# Supplementary material for: Multi-Omics Characterization of the 4T1 Murine Mammary Gland Tumor Model
Source: Front Oncol. 2020 Jul 23;10:1195. doi: 10.3389/fonc.2020.01195 (PMC7390911; doi:10.3389/fonc.2020.01195)
Supplement: Table S5 — Gene expression in 4T1 and BALB/c mammary gland in TPM. [file Table_5.XLSX]

## Sheet: Sheet1
Table S5: Gene expression in 4T1 and BALB/c Mammary gland in TPM.
gene	4T1_WT_1	4T1_WT_2	Balbc_Mamg_1	Balbc_Mamg_2
0610007C21Rik	63.278	62.5282	165.563	110.161
0610007L01Rik	56.5806	57.4827	34.2813	40.7932
0610007P08Rik	21.4127	21.8348	3.40331	1.37717
0610007P14Rik	41.0529	45.5922	35.8083	23.8551
0610007P22Rik	58.3043	61.9828	22.723	30.7687
0610008F07Rik	0	0	0.0753377	0.157496
0610009B22Rik	53.1359	53.5266	19.7053	7.94992
0610009D07Rik	110.143	108.232	30.4488	15.0852
0610009O20Rik	30.1167	32.4848	143.677	154.725
0610010B08Rik	3.77688	5.82297	1.40619	0.446934
0610010F05Rik	24.2152	23.4581	1.54656	0.779063
0610010K06Rik	2.11581	1.73625	1.25756	0.390382
0610010K14Rik	55.6569	57.422	73.9493	90.7344
0610010O12Rik	91.158	90.2799	144.858	98.0406
0610011F06Rik	39.3918	38.3552	93.5716	193.976
0610011L14Rik	17.8168	17.0411	22.9549	19.92
0610012G03Rik	25.7237	26.0584	79.4663	192.313
0610012H03Rik	0.0295263	0.0908098	0.202147	0.373035
0610030E20Rik	10.7789	11.79	16.1144	11.8361
0610031J06Rik	101.829	99.8553	173.364	163.807
0610037D15Rik	4.98531	6.22107	1.25479	0.556727
0610037L13Rik	19.3806	21.448	38.5952	15.9162
0610037P05Rik	48.1882	40.5461	64.3851	30.7198
0610038B21Rik	0.544743	0.429445	0.863361	4.66248
0610038F07Rik	2.36232	2.64771	1.32491	0.654263
0610039K10Rik	0.0515151	0.380552	1.67779	16.0681
0610040B10Rik	4.57442	3.64782	2.7595	2.36768
0610040J01Rik	0	0.0286349	4.21568	4.02263
0910001L09Rik	27.4734	27.4319	198.181	175.115
100039707	0.399463	0.962778	8.35875	5.00732
100042579	0	0	1.06126	1.16613
100043387	4.50636	4.4798	1.62634	0.607455
1100001G20Rik	0	0	200.126	100.335
1110001A07Rik	1.35537	2.56399	0	0
1110001A16Rik	27.7628	24.7823	3.3176	1.85309
1110001J03Rik	42.3816	33.1729	299.513	340.918
1110002B05Rik	98.8254	92.4499	61.1709	62.8979
1110002L01Rik	3.71566	3.84955	3.2838	1.68549
1110002N22Rik	36.1246	30.9984	6.19918	2.50843
1110003E01Rik	29.032	30.4927	75.6974	71.9981
1110004E09Rik	47.6694	49.6489	6.67377	14.8149
1110004F10Rik	197.383	185.76	45.3727	21.6479
1110005A03Rik	25.4803	28.9385	42.6436	45.5663
1110005A23Rik	7.27311	8.00783	2.7344	1.3274
1110006O24Rik	1.21052	0.908735	8.11012	10.3914
1110007A13Rik	21.7541	21.8707	31.0483	0.725655
1110007C09Rik	45.7355	46.3356	150.202	203.028
1110008F13Rik	143.188	137.665	111.496	150.603
1110008J03Rik	13.518	12.3982	14.2182	20.6943
1110008L16Rik	10.8948	10.6086	3.61525	1.74656
1110008P14Rik	37.2018	34.2085	296.399	401.913
1110012D08Rik	11.9343	12.2223	35.0586	30.7667
1110012J17Rik	18.8981	20.5162	1.58472	2.95779
1110012L19Rik	30.8011	29.661	8.94256	5.003
1110013L07Rik	0	0	2.04221	3.42232
1110014N23Rik	24.9742	26.1706	40.2429	60.3803
1110017D15Rik	1.54794e-06	0	8.73694e-06	0.450551
1110017F19Rik	1.24079	1.67788	0.873971	0.703746
1110018G07Rik	23.128	23.0691	34.4432	25.2443
1110018H23Rik	0	0	0	0
1110018J18Rik	42.1035	44.1123	39.2011	54.6452
1110020A21Rik	0.70434	0.685251	1.28439	0.523802
1110020G09Rik	23.1908	23.557	6.52214	9.49881
1110021J02Rik	10.0887	13.2813	23.6549	15.8247
1110021L09Rik	9.54009	11.919	27.2137	18.3713
1110028C15Rik	6.68466	7.24117	4.35897	1.79056
1110031I02Rik	10.1519	10.8791	11.0455	8.38575
1110032A03Rik	10.2168	11.382	37.2473	18.4416
1110032A04Rik	0	0	0	0.0651678
1110032F04Rik	0	0	0.972502	5.04114
1110034A24Rik	20.503	20.4668	4.6638	19.7808
1110034B05Rik	16.7455	18.8654	3.6976	1.362
1110034G24Rik	4.07241	4.69873	19.448	10.1863
1110037F02Rik	22.851	23.7818	11.0981	6.44315
1110038B12Rik	529.717	552.003	45.3676	43.8535
1110038D17Rik	18.278	16.401	64.0966	69.2961
1110038F14Rik	24.5231	26.4328	14.0205	13.6006
1110049B09Rik	0	0	0.0158263	0.0681748
1110049F12Rik	29.3295	28.6127	34.5681	80.0132
1110051M20Rik	1.42006	2.13001	15.057	7.80092
1110054O05Rik	26.8733	26.0743	10.0769	7.54336
1110057K04Rik	43.8188	41.4561	37.8814	21.3257
1110058L19Rik	35.9257	34.1389	14.2133	3.70259
1110059E24Rik	68.1694	60.846	6.46617	1.8474
1110059G10Rik	9.76231	9.61366	0.97217	1.10629
1110059M19Rik	0.0418015	0.0257012	6.62412	1.87801
1110065P20Rik	27.4326	22.8804	41.903	79.2878
1110067D22Rik	49.8162	52.4267	9.85319	3.50318
1190002H23Rik	0.104697	0.386081	462.148	918.842
1190002N15Rik	12.4773	13.4307	9.62237	21.5408
1190003J15Rik	34.5655	33.6968	39.5722	55.7567
1190003K10Rik	0	0	0	0
1190005F20Rik	21.7873	26.5275	14.0512	18.5988
1190005I06Rik	7.74465	7.13471	14.4978	46.6586
1190007F08Rik	1.89709	2.30657	34.8445	31.8146
1190007I07Rik	13.2184	12.2499	30.1124	49.2286
1200002N14Rik	0	0.31379	0	0
1200009I06Rik	6.34418	6.39766	12.0006	18.5771
1200011I18Rik	22.4383	23.3623	6.73223	5.41821
1200011M11Rik	26.7339	27.9553	6.63456	3.27817
1200014J11Rik	17.9831	19.4334	4.63856	3.2542
1200016B10Rik	7.32105	8.44385	4.21456	2.07642
1300001I01Rik	70.0164	79.7155	170.663	113.801
1300002K09Rik	0	0	0.439069	1.22377
1300010F03Rik	16.0087	16.0627	23.7963	16.9577
1300014I06Rik	15.0662	15.9147	33.4196	59.0986
1300017J02Rik	0.0750469	0.0692702	0.232258	0.860837
1300018I17Rik	23.5733	25.42	81.084	179.698
1300018J18Rik	4.20433	4.99665	43.5495	74.1487
14-3-3 gamma	1.73688	2.4449	2.05781	1.53223
1500001A10Rik	0	0	0	0.0226485
1500001M20Rik	27.9918	28.8535	19.7062	29.4204
1500002O20Rik	24.0849	24.6504	45.843	54.5646
1500003O03Rik	47.3258	47.0033	337.531	160.409
1500004A13Rik	1.73156	2.92939	5.00309	3.50741
1500009C09Rik	0	0.0177874	0.231985	0.0504509
1500009L16Rik	0	0.047	1.02738	0.60433
1500010J02Rik	27.0607	28.7643	24.0839	19.2745
1500011B03Rik	12.4035	11.0263	10.5222	15.1365
1500011H22Rik	83.9524	83.0071	32.5313	22.7611
1500011K16Rik	35.193	30.2548	71.4214	133.77
1500012F01Rik	437.275	374.952	22.4117	14.4416
1500015A07Rik	2.14858	2.12655	2.57913	1.27813
1500015O10Rik	0.111546	0.308467	1.75939	2.92998
1500017E21Rik	1.48168	2.10312	6.01796	1.59
1500031L02Rik	9.77696	9.62672	9.19088	12.1787
1500032L24Rik	79.6763	77.891	209.393	243.363
1520402A15Rik	4.1907	4.43676	12.3498	11.3113
1600002H07Rik	15.371	17.9096	8.46441	7.33252
1600002K03Rik	19.2664	21.9456	13.8463	19.4528
1600012F09Rik	22.3986	23.1702	5.03709	2.89875
1600012H06Rik	21.2436	23.7313	19.4961	24.368
1600012P17Rik	0	0	0.0423594	0.0592222
1600014C10Rik	5.92521	5.78856	52.4581	38.0471
1600014C23Rik	0.117514	0	0	0
1600014K23Rik	0	0	0	0.0534677
1600015I10Rik	0	0	0.0630392	0.0734431
1600016N20Rik	3.86315	5.04375	6.21187	7.73449
1600021P15Rik	1.16486	1.22546	3.93829	3.16536
1600027N09Rik	24.4595	26.8537	26.8247	39.9457
1600029D21Rik	64.9873	67.7465	36.93	20.5091
1600029I14Rik	0	0	0.218813	0.205976
1600029O15Rik	0.811856	0.878095	2.64813	1.3766
1700001C02Rik	0	0	0.114149	0.0672072
1700001C19Rik	0.497123	0.355938	0.42792	0.577788
1700001F09Rik	0.484704	0.372754	0	0
1700001G17Rik	0.222776	0.102677	0.773001	0.545457
1700001J03Rik	0.125868	0.728745	2.2717	1.12695
1700001J11Rik	0.243905	0.297715	0.0744604	0
1700001K19Rik	2.09047	2.19368	0.802203	1.17604
1700001K23Rik	0.128971	0.395358	0.594181	0.366298
1700001L05Rik	0.411138	0.559729	2.61934	2.00254
1700001L19Rik	0.193279	0.118911	0	0.0210004
1700001O22Rik	3.96271	4.07898	2.31906	5.61654
1700001P01Rik	2.50407	2.27885	0.110731	0.314991
1700003E16Rik	0.302057	0.305154	0.318554	0.565631
1700003F12Rik	1.02816	1.05246	1.78494	5.17765
1700003G18Rik	0	0.165875	0.057899	0
1700003H04Rik	0	0	0	0
1700003M02Rik	0	0.0573511	0.031817	0
1700006A11Rik	0	0	0.0300662	0
1700006E09Rik	0	0	0	0
1700007B14Rik	0	0	0	0
1700007E06Rik	0	0	0	0
1700007G11Rik	0	0.0682576	0	0
1700007I08Rik	0.506524	0.568149	0.408037	0.858309
1700007K09Rik	0.23955	0.49021	0.204073	0
1700007K13Rik	0	0.0743528	0.0382684	0
1700008A04Rik	0	0	0	0
1700008F21Rik	45.4296	41.8626	0.472647	0.36763
1700008I05Rik	0.0246458	0	0	0
1700008J07Rik	0.753933	0.774257	2.25366	5.92286
1700008O03Rik	0	0.0651278	0.867884	1.27107
1700008P02Rik	0	0	0	0
1700008P20Rik	0	0	0	0.0996167
1700009J07Rik	0	0	0.677957	1.00414
1700009N14Rik	0	0	0	0
1700009P17Rik	1.06221	1.10723	6.95818	3.51051
1700010B08Rik	0.275728	0.203336	0.139122	0.0490782
1700010D01Rik	0	0	0	0
1700010H22Rik	0	0	0	0
1700010I14Rik	0	0.0337079	0.502888	0.45718
1700010M22Rik	0	0	0.308658	0.187331
1700011A15Rik	0	0.100679	0.103296	0.0485796
1700011E24Rik	0.0592269	0	0.149737	0.0528766
1700011F03Rik	0	0	0	0
1700011F14Rik	0	0	0	0
1700011H14Rik	0	0.0245513	0.0499701	0
1700011I03Rik	0	0	0.220786	0.10797
1700011L22Rik	0	0	0.124369	0
1700011M02Rik	0	0	0	0
1700012A03Rik	0	0	0	0
1700012A16Rik	0.295142	0.272401	0.117579	0.3108
1700012B07Rik	0	0	0.0327437	0.0461678
1700012B09Rik	0.497328	0.518191	0	0
1700012B15Rik	18.6813	21.4604	47.8565	35.6569
1700012D14Rik	0.470935	0.685552	0.686144	0.319768
1700012L04Rik	0.345332	0.282401	0.67576	0.107592
1700012P22Rik	0	0	0	0
1700013B16Rik	0	0	0.00645537	0
1700013D24Rik	0	0	0	0
1700013F07Rik	0.0963055	0.118147	0.186257	0.265608
1700013G24Rik	0	0	0.086768	0
1700013H16Rik	0	0	0	0
1700014N06Rik	0	0	0	0
1700015E13Rik	0	0	0.267508	0.126301
1700015F17Rik	0.0746796	0	0	0.0674781
1700015G11Rik	0	0	0	0
1700016C15Rik	0.834197	1.06734	0.1767	0
1700016D06Rik	0.747115	1.15807	1.73466	1.15409
1700016H13Rik	0.065129	0.120018	0.123876	0
1700016K19Rik	0.259318	0.0637522	0.0653094	0.276245
1700016M24Rik	0	0	0.00813795	0.022734
1700017B05Rik	20.7569	20.4136	9.24438	18.4198
1700017D01Rik	0	0	0	0.0683124
1700017N19Rik	0	0	0	0
1700018A04Rik	0	0	0	0
1700018A14Rik	0	0	0.047491	0.202027
1700018B08Rik	0	0	0	0
1700018B24Rik	0	0	0	0.177072
1700018C11Rik	0	0	0.0515653	0.14647
1700018F24Rik	0	0	0.0788903	0
1700018L02Rik	1.24778	1.80256	19.0518	110.699
1700018L24Rik	0	0.0776947	0.120161	0.113267
1700019A02Rik	0	0	0	0
1700019B03Rik	0.0275539	0.0169501	0.136576	0.144072
1700019D03Rik	0	0	5.00754	4.58873
1700019E19Rik	59.251	62.7611	24.0362	16.2149
1700019G17Rik	7.05884	7.40279	2.92995	1.55724
1700019L03Rik	3.73428	3.21156	2.16186	1.78713
1700019M22Rik	0	0	0	0
1700019N12Rik	0.263138	0.404075	1.41017	0.872138
1700019N19Rik	0	0	0.234312	0.424885
1700019O17Rik	0	0	0.0155484	0
1700020A23Rik	0	0.13268	0.575157	0.100496
1700020C07Rik	0.0655646	0.120818	0.249465	0.647051
1700020D05Rik	0.0869394	0.293977	1.03553	1.76373
1700020I14Rik	44.8964	49.3148	28.4164	9.74076
1700020L24Rik	2.15491	1.51822	16.2873	39.0735
1700020N01Rik	0	0	0.0842345	0
1700020N18Rik	0	0	0	0.100799
1700020O03Rik	6.16181	4.671	6.34792	5.76367
1700021C14Rik	15.6678	15.347	16.168	7.73801
1700021F05Rik	44.6527	51.3338	5.7916	5.04027
1700021F07Rik	0	0	0	0
1700021K19Rik	22.0425	21.623	47.2165	54.5109
1700022A21Rik	0	0	0	0
1700022I11Rik	0.0110739	0.0204487	0.0136551	0.0190638
1700022P22Rik	0	0.195985	8.61584	3.43791
1700023A16Rik	0	0.0222649	0.0452233	0
1700023D19Rik	0	0	0	0
1700023E05Rik	0	0	0.0334784	0.0234578
1700023F06Rik	0.815975	0.950535	1.0766	2.72628
1700023I07Rik	0	0	0	0
1700024G13Rik	0	0	0	0
1700024P04Rik	0	0	0.443192	0
1700024P16Rik	0.450677	0.551614	0.134299	0.263498
1700025C18Rik	0	0	0	0
1700025E21Rik	0.135794	0.0835151	0	0
1700025F22Rik	0	0	0	0
1700025G04Rik	7.39767	7.0077	5.01111	2.22269
1700025K23Rik	9.56579	10.3435	5.44714	1.68584
1700026D08Rik	0	0	0	0
1700026D11Rik	0.118454	0	0.449211	0.211506
1700026J04Rik	0.017743	0.0545929	1.36402	0.598239
1700026L06Rik	0.231581	0.284034	2.11532	2.38233
1700027A23Rik	0	0	0.576945	0.268211
1700027D21Rik	0.0362388	0.0668563	0.106734	0.218485
1700028B04Rik	0	0	0.0692377	0
1700028J19Rik	0.781839	0.613562	2.78398	1.27287
1700028K03Rik	0	0	0.237341	0.473509
1700028M03Rik	0	0	0.182665	0
1700028P14Rik	0	0	0	0
1700029F09Rik	46.9079	45.8331	2.58099	1.71606
1700029F12Rik	0.0414919	0.104153	0.356575	0.20133
1700029G01Rik	8.31494	9.26486	2.97996	3.56661
1700029H14Rik	0	0	0.199807	0.364455
1700029I01Rik	0.0201642	0.0507581	0.784026	0.416664
1700029I15Rik	2.30892	1.61934	23.3455	26.7846
1700029J07Rik	1.96979	1.58665	1.03286	0.952757
1700029J11Rik	0.506921	0.829735	1.1365	1.53876
1700029M20Rik	0	0	0	0.0127769
1700029P11Rik	0	0	0	0
1700030C10Rik	0.255882	0.302648	3.54982	7.8808
1700030F18Rik	0	0	0.11552	0.328918
1700030J22Rik	0.6344	0.696657	0.314348	0.265202
1700030K09Rik	18.2235	18.046	11.7622	10.0238
1700031F05Rik	0	0	0	0
1700031F10Rik	0	0	0.054762	0
1700031M16Rik	0	0	0	0
1700034E13Rik	0	0	0	0
1700034F02Rik	0.378762	0.404791	0.0123464	0
1700034H14Rik	26.6493	28.5957	8.20702	3.49633
1700034H15Rik	1.11327	1.87715	2.03135	1.72223
1700034I23Rik	0.0181537	0	0.134631	0.0471261
1700034J05Rik	0	0	0.117171	0
1700034O15Rik	0	0	0	0
1700037C18Rik	3.9514	4.46889	3.70029	7.91804
1700037H04Rik	35.3617	35.0334	359.355	564.689
1700039E15Rik	0	0	0.0944509	0.154362
1700040F15Rik	0	0	0	0
1700040I03Rik	12.0321	13.7373	27.2669	24.0696
1700040L02Rik	0	0	0.0930727	0.0326887
1700041B01Rik	0	0	0	0
1700041C02Rik	0.218773	0.195961	0.124906	0.109064
1700041C23Rik	0	0	0	0
1700042B14Rik	0	0	0.0546873	0
1700042G07Rik	0	0	0	0
1700044K03Rik	0	0	0	0
1700045I19Rik	0	0	0.0244018	0
1700047M11Rik	0	0	0.54954	0.0709083
1700048O20Rik	0.380876	0.33728	2.89697	0.898826
1700049E15Rik	0	0	0.0335666	0
1700049E17Rik1	16.0532	14.6298	0.0153303	0
1700049G17Rik	12.4079	16.5052	3.65114	0.734029
1700049L16Rik	0	0	0.199935	0
1700052I22Rik	0	0	0	0
1700052K11Rik	7.76895	7.52612	2.70366	8.42147
1700052N19Rik	19.2117	19.8789	10.5167	6.0322
1700054K19Rik	0	0	0	0
1700054N08Rik	10.5365	10.5249	0.939548	2.54658
1700054O13Rik	0	0	0	0
1700056E22Rik	1.25349	1.47928	2.99638	15.5135
1700057G04Rik	0.921612	0.891998	0.519605	0.256327
1700057K13Rik	0	0.0677786	0.104342	0
1700058C13Rik	0	0	0	0.0379939
1700058G18Rik	0	0	0	0
1700060C20Rik	0	0	0.0624079	0
1700061G19Rik	0.915525	1.1268	0.288467	0.38838
1700061J05Rik	0	0	0.0554441	0.0780245
1700065D16Rik	0.114322	0.0791957	0.114725	0.258928
1700065I17Rik	0	0	0	0
1700066B19Rik	0.135273	0.135274	0.836502	0.701668
1700066M21Rik	9.43154	9.81418	1.9897	4.19345
1700066O22Rik	0	0	0.0318332	0
1700067K01Rik	0.96552	1.43632	1.32012	3.3798
1700067P10Rik	0	0	0.0408014	0
1700069L16Rik	0	0	0.0963139	0
1700071K01Rik	0	0.0565154	0.144541	0.121865
1700072E05Rik	0	0	0	0
1700073E17Rik	0	0.0164057	0.0549988	0.00763426
1700074P13Rik	0	0	0	0
1700080E11Rik	0	0	0	0
1700080O16Rik	0	0	0	0
1700081L11Rik	34.7931	35.0096	57.7375	57.7844
1700084C01Rik	0	0	0.0409832	0.0287575
1700084E18Rik	0.936169	1.14841	5.24395	10.4888
1700084J12Rik	0	0.0445637	0.138332	0.197218
1700086L19Rik	0	0	0.0391407	0
1700086O06Rik	8.26745	7.96347	4.79326	7.2636
1700088E04Rik	5.33369	7.63253	0.978013	0.586686
1700090G07Rik	0	0	0.0825838	0
1700092M07Rik	1.76953	2.0525	2.60679	3.82601
1700093K21Rik	0.0340074	0.0418299	0.106075	0.0893423
1700094C09Rik	0	0	0	0
1700094D03Rik	3.68635	5.32761	7.60844	3.86697
1700096J18Rik	0.434378	0.533009	0	0.13937
1700096K18Rik	0.497227	0.656707	9.81068	24.4482
1700101E01Rik	0.0525588	0.0969076	0.264835	0.746925
1700102P08Rik	0.929542	0.545531	0.211765	0.260633
1700106J16Rik	0.0379209	0	0	0
1700106N22Rik	3.65843	2.80686	2.67422	2.37109
1700108F19Rik	0.082539	0.253308	0.211246	0.051179
1700108J01Rik	0	0.0845162	0	0
1700108M19Rik	0	0	0	0
1700109F18Rik	1.6717	1.93501	12.5088	42.7463
1700109G14Rik	0	0	0	0
1700109H08Rik	3.05115	3.75729	1.45633	0.378188
1700110M21Rik	0	0	0.0863126	0.0604237
1700111N16Rik	0	0.0254573	0	0
1700112E06Rik	0.517746	0.196354	7.03773	4.31321
1700113H08Rik	0	0	0.359069	0.112317
1700113I22Rik	2.07097	2.37162	8.20271	2.06632
1700120K04Rik	1.20337	1.94523	2.41672	1.42405
1700121N20Rik	0	0	0	0
1700123I01Rik	0	0	0.443873	0.334982
1700123K08Rik	0.0909733	0.0279632	0	0
1700123L14Rik	0.0551524	0.0476867	1.20977	1.69506
1700123O20Rik	31.0609	28.5579	32.5694	39.055
1700125D06Rik	0	0	0.446497	1.65122
1700125H20Rik	0.15345	0.329758	0	0
1700128F08Rik	1.48727	1.29175	3.92479	2.6047
1700129C05Rik	0	0	0.0278828	0
1810006K21Rik	247.517	254.08	279.09	122.552
1810008A18Rik	34.3796	34.7798	20	27.5228
1810009A15Rik	178.587	164.994	12.1817	12.352
1810009J06Rik	0	0	0	0
1810010D01Rik	0.0522785	0.0321306	18.3052	25.3939
1810010H24Rik	0.59993	0.684999	8.13706	10.276
1810011H11Rik	0	0	2.86245	2.10043
1810011O10Rik	79.2765	89.5149	29.7787	22.3257
1810012P15Rik	6.82075	7.37888	6.7198	4.71116
1810013D10Rik	60.9296	55.2625	63.1122	40.638
1810013L24Rik	33.0017	35.7744	12.1411	15.758
1810014B01Rik	11.0687	11.7974	6.19717	3.32145
1810014F10Rik	10.1525	12.2756	44.8415	47.7643
1810019J16Rik	29.7041	29.6933	6.41611	15.7773
1810020D17Rik	9.43016	10.7176	54.0174	26.1775
1810022C23Rik	0.136747	0.315407	4.0229	1.8667
1810022K09Rik	304.2	308.993	4.45096	2.0436
1810024B03Rik	0.60456	0.603924	2.195	1.80664
1810026J23Rik	39.8441	41.0969	35.0078	37.5369
1810027O10Rik	184.526	153.414	279.596	205.275
1810029B16Rik	89.4514	93.7466	1.62644	0.842559
1810030J14Rik	0	0	0	0
1810030N24Rik	45.045	39.9503	4.53186	1.79874
1810030O07Rik	27.6032	30.1952	19.1619	15.309
1810031K17Rik	59.732	62.6776	54.8187	61.2891
1810032O08Rik	57.4201	59.7417	11.6637	15.1708
1810033B17Rik	0	0	4.01887	2.51593
1810035L17Rik	159.538	161.342	33.2329	10.5887
1810037I17Rik	86.737	82.0222	37.1523	33.3859
1810041L15Rik	0.0207579	0.0390336	0.554986	0.284793
1810043G02Rik	14.99	19.246	41.9325	80.3008
1810043H04Rik	48.1919	46.1411	40.6467	97.7385
1810046J19Rik	47.0217	39.1887	59.7119	52.1593
1810046K07Rik	0	0	0.92863	3.1533
1810048J11Rik	21.2814	22.7626	7.73211	4.10252
1810049H13Rik	11.9192	10.2134	40.1232	45.8624
1810053B01Rik	1.92311	1.44518	1.05874	0.633142
1810055G02Rik	53.0288	54.3215	36.1248	35.5942
1810058I24Rik	48.8819	49.6556	161.335	154.537
1810062O18Rik	1.21716	1.04821	1.65094	3.20932
1810063B05Rik	55.2043	50.1908	27.1016	76.6157
1810063B07Rik	10.4897	10.3142	7.99169	14.7254
1810064F22Rik	0.614727	0.994947	0.436299	0.217361
1810065E05Rik	0	0	0.133521	0.14123
1810074P20Rik	11.3308	11.2981	2.41378	1.8672
2010000I03Rik	1.66516	2.28057	3.31588	1.56767
2010001E11Rik	1.35114	1.54046	0.494542	0.343052
2010001M06Rik	1.52605	1.34566	12.3333	23.0008
2010001M09Rik	0.158313	0.0324327	12.2662	17.2983
2010002M12Rik	0.188169	0.231619	0.240466	0.0446934
2010002N04Rik	20.5845	18.6739	20.3719	17.0173
2010003K11Rik	0	0	13.8254	12.3593
2010003K15Rik	0	0	0	0.0727576
2010005H15Rik	0	0.0699864	0.21663	0
2010007H12Rik	19.0324	17.9298	16.5355	53.924
2010011I20Rik	7.92499	7.52133	35.5511	50.2583
2010012O05Rik	2.93659	2.9851	7.95307	4.73279
2010015L04Rik	10.6759	12.0026	2.01612	1.30856
2010016I18Rik	0.5643	0.627711	14.498	54.9733
2010106E10Rik	0	0	0.022848	0
2010106G01Rik	22.7451	23.5589	18.1743	9.77507
2010107E04Rik	535.277	471.925	64.3616	27.4373
2010107G12Rik	0.258021	0.536129	0.651785	0.572399
2010107G23Rik	8.10429	6.9442	2.90671	2.79212
2010107H07Rik	31.9942	33.3242	127.124	143.406
2010109I03Rik	1.16404	1.49793	1.36231	0.856718
2010109K11Rik	4.39539	4.22898	7.51202	27.9293
2010110P09Rik	0	0	29.3354	28.4363
2010111I01Rik	3.85668	4.49913	7.90255	4.75172
2010209O12Rik	6.06876	7.77181	29.0836	27.6063
2010300C02Rik	0.160353	0.129065	1.86145	2.21859
2010305A19Rik	6.52811	6.39422	5.01355	3.49595
2010315B03Rik	27.9053	31.0994	3.46737	2.67366
2010317E24Rik	4.50678	5.01283	0.267167	0.59322
2010320M18Rik	12.1122	14.6623	8.76692	9.32864
2010321M09Rik	26.9282	26.7813	14.3593	9.5341
2200002D01Rik	38.0917	34.327	7.72693	22.1624
2200002J24Rik	0	0	0.118656	0.169026
2200002K05Rik	1.26139	1.29798	1.03811	0.717049
2210009G21Rik	5.28162	4.75136	1.54254	0.619486
2210010C04Rik	0.100184	0.0369871	0.70738	0.0347252
2210010C17Rik	0.134917	0.188864	1.35514	2.22368
2210012G02Rik	6.82149	8.07516	5.171	4.55892
2210013O21Rik	43.7076	44.2708	34.0374	30.4471
2210015D19Rik	12.7429	11.8218	43.9421	18.2105
2210016F16Rik	0.134989	0.185367	20.0262	45.6683
2210016L21Rik	31.6714	33.1818	15.1987	21.8639
2210018M11Rik	22.6028	23.6307	15.2697	9.75306
2210020M01Rik	1.50715	1.76626	4.66171	6.05272
2210021J22Rik	12.0893	12.4508	28.0184	25.3618
2210023G05Rik	0	0	1.49297	1.63903
2210403K04Rik	3.67065	4.25709	22.5287	17.7726
2210404J11Rik	24.988	26.89	32.3496	16.2789
2210404O07Rik	0.502251	0.67787	22.1433	18.17
2210407C18Rik	0	0	1.88426	0.90327
2210408I21Rik	2.79809	2.99631	0.569476	0.360492
2210409E12Rik	0.490601	0.0891586	0.430985	0.661842
2210411K11Rik	45.8652	45.7873	33.6942	162.323
2210415F13Rik	0	0	0.761669	0.0397063
2210417A02Rik	0	0	0	0.0995992
2210418O10Rik	17.4961	18.1802	2.47487	0.783255
2300002M23Rik	0	0	0	0
2300003K06Rik	0	0	0	0
2300005B03Rik	0	0	1.48387	0
2300009A05Rik	28.2474	26.4497	121.608	266.237
2310001A20Rik	17.5204	18.1598	90.8295	46.2775
2310001K24Rik	0	0.0872475	3.97571	3.9593
2310002J15Rik	0.0657846	0.0808151	29.8311	24.2024
2310002L09Rik	0	0	16.0228	0
2310002L13Rik	26.4914	25.3148	0	0
2310003C23Rik	53.4492	53.4658	47.5456	28.1567
2310003F16Rik	216.913	211.601	13.6642	11.3756
2310003H01Rik	10.8688	11.397	39.5259	56.7469
2310003L22Rik	8.12172	7.74115	3.90462	1.72828
2310004I24Rik	21.7107	21.6844	12.4259	5.59396
2310004N24Rik	37.1258	34.1258	21.6558	21.3664
2310005E10Rik	2.05611	1.62437	4.15014	1.69574
2310005G13Rik	0.0272996	0	0.0253519	0
2310005N01Rik	22.5947	29.5879	11.7764	5.94957
2310007B03Rik	2.33383	3.17063	0.656211	0.193214
2310007F21Rik	0.791415	0	6.60386	0.424938
2310007L24Rik	0	0.0398737	8.56915	1.9462
2310008H04Rik	18.5031	17.1772	0.714063	0.631568
2310008H09Rik	36.8373	38.1582	14.0404	5.71261
2310009B15Rik	37.902	34.7892	31.1274	54.866
2310010M20Rik	2.94704	4.36941	12.804	1.33298
2310011J03Rik	42.2439	40.4376	53.7952	66.4159
2310014H01Rik	73.2154	72.746	49.4106	83.766
2310014L17Rik	2.10614	2.51403	1.52019	2.06817
2310015A10Rik	1.46625	1.18622	11.0475	10.8298
2310016C08Rik	24.2607	22.3838	18.2623	14.5027
2310016M24Rik	67.8368	64.2233	243.09	320.47
2310021H06Rik	0	0	0	0
2310021P13Rik	33.9922	35.3363	72.2347	103.008
2310022A10Rik	21.4833	20.9812	42.4639	30.278
2310022B05Rik	49.6292	49.4565	22.5564	29.4626
2310022K01Rik	0	0.287685	0	0.545423
2310028H24Rik	3.19865	3.61339	26.344	56.7135
2310028O11Rik	32.6084	31.6876	25.7502	14.4284
2310030G06Rik	19.2699	21.9216	7.60085	3.49584
2310030N02Rik	23.1528	20.6694	11.6777	9.42848
2310033E01Rik	0.0719395	0.0441779	0.411958	0.454043
2310033P09Rik	16.455	17.708	17.9691	23.6818
2310034C09Rik	0	0	0	0
2310035C23Rik	14.7667	17.1022	12.3653	44.1273
2310035K24Rik	11.3946	11.0479	62.7521	58.126
2310036O22Rik	164.478	177.758	59.2438	105.482
2310037I24Rik	92.3751	93.5566	44.4572	50.8313
2310039D24Rik	0	0	0	0
2310039H08Rik	24.0593	23.1466	93.5478	207.037
2310042D19Rik	3.27486	4.49268	24.561	2.60625
2310042E22Rik	0	0	3.1574	0.499603
2310043J07Rik	0.637553	1.07758	0	0.0407701
2310044G17Rik	14.5668	14.3401	13.9273	12.6055
2310044H10Rik	58.7958	57.7671	240.603	343.188
2310045N01Rik	55.8328	61.0607	172.991	172.512
2310046A06Rik	0	0	13.9311	0.557179
2310046K01Rik	0.81256	0.749025	9.83486	12.2258
2310046O06Rik	16.0409	21.115	44.7637	35.1696
2310047B19Rik	8.61662	7.36374	6.82615	13.4555
2310047M10Rik	7.56585	6.71354	14.9466	35.7512
2310050B05Rik	0.824547	1.21627	83.255	2.91325
2310050C09Rik	0	0	8.11389	0.235445
2310057J16Rik	11.2084	11.5983	11.3528	10.5223
2310057J18Rik	0	0	0	0
2310057M21Rik	12.3317	14.0012	2.99902	2.82283
2310057N15Rik	0	0.0803119	0	0
2310061C15Rik	16.5822	16.273	7.66252	4.97366
2310061F22Rik	2.5963	3.8589	1.54572	4.99235
2310061I04Rik	53.4483	51.5882	62.4616	75.3863
2310061J03Rik	1.28275	0.930442	15.5745	63.3981
2310061N02Rik	0	0	0	0
2310067B10Rik	22.339	23.6966	78.0036	88.8298
2310068J16Rik	0.338544	0.181102	0.975882	4.6255
2310079F23Rik	9.33769	10.1026	7.82915	6.43499
2310079G19Rik	0	0	0	0
2400001E08Rik	86.2546	80.1395	299.362	292.339
2400003C14Rik	87.0488	85.6571	55.2668	30.2598
2410001C21Rik	51.1567	50.2679	67.3355	42.0741
2410002F23Rik	104.564	114.31	55.0964	87.9985
2410002I01Rik	10.7169	13.6139	30.4522	46.7507
2410002O22Rik	29.7875	30.52	7.46368	3.61693
2410003K15Rik	57.3107	45.2735	38.8639	161.688
2410004A20Rik	0	0.0160708	0.454409	1.00823
2410004B18Rik	34.807	35.426	9.38054	24.2135
2410004P03Rik	0.451078	0.460613	3.18855	1.83428
2410006H16Rik	1488.75	1426.84	95.0725	124.683
2410012M07Rik	0	0	0	0.0418884
2410015M20Rik	101.065	83.2986	138.974	134.305
2410016O06Rik	17.3832	15.3532	7.343	27.917
2410017I17Rik	0.077432	0.0664301	0.129435	0.103235
2410017P07Rik	0.896115	0.822014	0.0759175	0.0743981
2410018L13Rik	1.44335	1.07712	1.89542	2.91458
2410022L05Rik	59.0341	55.5479	10.748	13.1491
2410022M11Rik	0.999601	1.13219	6.66473	26.1368
2410025L10Rik	0.89105	0.435534	3.32949	37.0547
2410042D21Rik	29.8529	32.1075	1.99482	1.03635
2410066E13Rik	2.05699	2.15127	8.40121	10.4048
2410075B13Rik	0.19351	0.285082	3.38262	7.746
2410076I21Rik	0.624463	0.56925	3.2168	3.85244
2410089E03Rik	19.7422	20.9754	3.79106	3.84067
2410091C18Rik	29.956	30.3688	14.1238	6.19428
2410127L17Rik	50.8518	52.411	22.0155	23.4088
2410129H14Rik	5.00024e-09	5.2983e-07	3.86447e-10	0
2410131K14Rik	15.7954	15.6153	17.671	13.9845
2410137F16Rik	0.061791	0.106489	0.0533705	0.0319426
2410137M14Rik	0.0576593	0.0354308	0.182068	0
2500003M10Rik	125.78	134.347	23.9601	38.01
2510002D24Rik	24.6786	26.0341	51.4524	64.5513
2510003E04Rik	35.9223	34.2344	24.8382	59.3657
2510006D16Rik	100.293	101.856	152.083	183.047
2510009E07Rik	0.590676	0.683598	12.6722	11.267
2510012J08Rik	52.525	53.4729	17.6834	33.8356
2510039O18Rik	43.8569	43.2782	60.0259	129.15
2510049J12Rik	0.530057	0.52646	0.44119	0.26738
2610001J05Rik	18.4107	18.004	18.4522	6.22087
2610002D18Rik	23.8153	22.4017	0.27083	0.348681
2610002I17Rik	9.30508	10.2836	3.35637	5.07776
2610002J02Rik	38.6718	38.3866	72.2186	81.4374
2610002M06Rik	10.2729	10.792	4.11122	1.59411
2610008E11Rik	6.60335	8.22491	1.21275	0.675359
2610015P09Rik	7.6971	8.44384	1.93648	0.956496
2610017I09Rik	0.0956106	0	0.123217	0
2610018G03Rik	0.406894	0.401775	2.03817	5.25201
2610019F03Rik	0	0	39.3153	30.0072
2610020H08Rik	4.62842	5.01575	1.7438	1.27518
2610021K21Rik	6.29066	6.63195	0.59388	0.445125
2610024G14Rik	37.0903	38.4019	12.8034	25.7196
2610027L16Rik	24.5513	24.0206	11.1331	13.598
2610028E06Rik	0.0710419	0.0433983	0.151595	0.0502793
2610028H24Rik	0	0	1.01156	0.0260905
2610029G23Rik	39.0206	37.9517	9.74417	7.7099
2610029I01Rik	8.84362	8.68777	3.46537	2.16823
2610034B18Rik	48.6469	48.51	15.0777	10.8389
2610034M16Rik	0	0	0.226707	0.0642409
2610035D17Rik	0.68334	0.724337	10.2777	5.0243
2610039C10Rik	29.8914	31.4886	5.29019	7.82897
2610042L04Rik	3.46374	4.19395	2.78959	1.17163
2610044O15Rik	30.5065	37.8117	7.29575	3.43849
2610100L16Rik	0	0	0.186813	0.0291329
2610101N10Rik	136.489	138.723	3.11104	2.8269
2610109H07Rik	0.0474	0.024248	0.956424	1.38488
2610110G12Rik	3.22439	5.43169	12.2786	22.1736
2610203C20Rik	117.93	172.033	18.1062	5.46736
2610203C22Rik	2.91976	2.33867	3.96821	1.88848
2610204G22Rik	0.555555	0.327391	2.04005	1.13966
2610301B20Rik	19.002	19.6689	7.44346	2.91315
2610301G19Rik	27.4823	29.6148	32.7491	38.4432
2610305D13Rik	17.9657	20.0575	0.325726	0.0149774
2610306M01Rik	2.58625	3.29331	4.00095	1.95935
2610318N02Rik	0.230967	0.43692	1.44211	2.0937
2610507B11Rik	83.9447	85.9847	98.4033	57.0744
2610524H06Rik	10.4752	10.5524	22.8425	26.1911
2610528E23Rik	54.2617	54.285	9.55127	8.40461
2610528J11Rik	0.483395	0.297082	8.46253	10.6956
2700007P21Rik	51.8324	56.8225	3.79256	2.79146
2700023E23Rik	43.0276	49.3107	11.8766	10.2445
2700029M09Rik	135.393	148.859	3.90524	2.23433
2700046A07Rik	0	0	0	0.017444
2700046G09Rik	0.996439	1.10999	4.56981	5.98175
2700049A03Rik	4.81996	4.72716	2.31787	1.58428
2700050L05Rik	9.63431	10.6648	4.3791	3.16862
2700060E02Rik	171.67	164.046	24.5015	18.5797
2700062C07Rik	31.9008	34.6754	7.14721	7.16973
2700078E11Rik	33.8871	33.9752	7.47632	7.36917
2700078K21Rik	27.8832	26.531	36.4552	28.7457
2700081O15Rik	29.8961	33.2204	20.5732	38.5239
2700086A05Rik	9.52255	10.7284	1.64354	3.64583
2700089E24Rik	71.6077	75.1338	37.2061	83.0832
2700094K13Rik	77.483	69.4417	20.8523	55.2996
2700097O09Rik	14.435	18.617	9.71216	3.57804
2700099C18Rik	33.0226	36.8994	0.83662	0.292572
2810001G20Rik	2.24519	1.85092	2.96965	4.04385
2810002D19Rik	4.02086	4.36996	2.71052	0.607178
2810002N01Rik	72.2479	69.8864	47.1041	109.552
2810004N23Rik	140.385	143.095	17.7111	15.2975
2810006K23Rik	5.68041	6.79266	9.8726	6.32086
2810007J24Rik	0	0	0	0.106665
2810008D09Rik	73.7726	86.3385	71.0481	99.6203
2810008M24Rik	78.3998	80.4353	11.4757	4.88934
2810021B07Rik	7.93457	8.54381	7.78389	21.0102
2810021J22Rik	6.55355	8.15938	2.43389	1.5955
2810025M15Rik	54.5885	54.758	10.616	9.50263
2810026P18Rik	194.602	209.552	12.123	5.15283
2810030E01Rik	2.20586	2.50826	1.35161	2.81002
2810032G03Rik	0	0	0.388048	0.12825
2810046L04Rik	22.6274	23.5332	9.3826	19.8826
2810047C21Rik1	0	0	1.97261	0.58571
2810055F11Rik	24.9251	27.1958	26.0691	62.7904
2810055G20Rik	0.469815	0.573678	2.19223	1.23097
2810403A07Rik	92.1275	113.495	54.2765	48.5747
2810403D21Rik	3.74482	1.90974	0.18098	0.253897
2810405F15Rik	0.488701	0.583544	0.0536546	0.125371
2810405K02Rik	0	0	81.1697	42.0869
2810407C02Rik	101.806	104.556	49.1247	25.3292
2810408A11Rik	3.86635	4.01804	1.47823	1.3367
2810408M09Rik	15.7034	16.4703	16.9782	29.5477
2810410L24Rik	2.42172	2.83702	2.70464	6.79355
2810417H13Rik	59.2908	57.9594	1.2415	0.999441
2810422J05Rik	52.5664	54.028	106.891	77.4601
2810422O20Rik	13.3725	10.9606	0.546289	0.192818
2810428I15Rik	102.999	97.9374	222.11	368.603
2810429I04Rik	61.3864	73.9886	1.36611	1.94907
2810432D09Rik	37.0499	36.5414	40.5599	68.1733
2810432L12Rik	0	0.00862528	11.2063	5.91174
2810433D01Rik	0.354676	0.29066	2.75704	1.63809
2810433K01Rik	0	0	0	0.070106
2810442I21Rik	1.03661	1.04568	0.0705452	0.136427
2810453I06Rik	33.4336	33.87	23.7373	18.925
2810454H06Rik	0.089119	0.118835	0.220207	0.307704
2810459M11Rik	0.0124062	0.00763598	0.458917	0.897895
2810474O19Rik	29.0717	30.8083	5.21773	4.70596
2900002K06Rik	1.97925	2.32227	1.90035	1.87137
2900005J15Rik	0.170312	0.237697	9.72329	15.2749
2900006K08Rik	1.17342	1.26778	0.363479	0.169467
2900010J23Rik	263.9	242.983	147.215	140.073
2900010M23Rik	278.716	230.937	146.186	131.878
2900011O08Rik	0	0	0.290702	0.315632
2900024O10Rik	2.63893e-08	0.476543	0.0156516	0.0387197
2900026A02Rik	24.1669	25.4531	18.1698	18.3707
2900041M22Rik	0	0	0.823024	0.562831
2900052N01Rik	0	0	1.01345	0.455457
2900053A13Rik	12.5398	11.048	5.83379	2.45145
2900060B14Rik	0.28544	0.0583655	0.122588	0
2900062L11Rik	0	0	33.2193	89.8158
2900064A13Rik	105.971	98.3431	34.3753	24.9288
2900073G15Rik	352.773	340.889	123.74	106.953
2900079G21Rik	0	0	0.281622	0
2900083I11Rik	0	0	0.0383447	0.0714176
2900092C05Rik	0.0564963	0	0	0
2900092D14Rik	0.180465	0.4162	0.470515	0.271013
2900092E17Rik	23.5948	23.1247	24.5204	30.7613
2900097C17Rik	83.9035	86.8581	36.6317	55.8199
2b4	0	0	0	0
3000002C10Rik	3.4376	3.17768	8.47618	5.47398
3010026O09Rik	15.3569	16.0403	7.08839	7.15774
3110001D03Rik	40.7516	38.2666	54.1989	83.8257
3110001I22Rik	5.86859	6.54984	1.1467	0.434815
3110001K24Rik	0.69691	0.495704	0	0.638235
3110002H16Rik	21.2299	21.7911	47.3405	30.59
3110003A17Rik	158.607	157.077	5.81103	4.26587
3110007F17Rik	0	0	5.55249	2.21463
3110009E18Rik	7.12834	8.20546	2.76597	2.48761
3110021A11Rik	0.552225	0.414687	1.04827	2.74349
3110035E14Rik	0.0261243	0.0643156	0.169292	0.168899
3110039M20Rik	0	0	0	0
3110040N11Rik	18.1455	17.0295	14.2649	11.2958
3110043O21Rik	28.513	29.9279	25.2444	9.3316
3110047P20Rik	0	0.0028899	0.00288465	0.0321697
3110052M02Rik	7.42804	8.11474	1.97961	1.48238
3110056O03Rik	7.04889	7.44414	34.4304	50.2524
3110057O12Rik	2.53026	2.64227	13.0981	10.2299
3110062M04Rik	4.76956	4.51997	8.11916	9.95601
3110070M22Rik	0.873178	1.35658	2.35377	2.16072
3110079O15Rik	0	0	93.1746	203.778
3110082D06Rik	0	0.00360047	0.390507	0.804415
3110082I17Rik	21.793	22.8501	9.15269	11.36
3110099E03Rik	0.84516	0.8636	0.157906	0
3200002M19Rik	32.7999	34.9649	32.8195	22.1364
3230401D17Rik	54.1607	57.2409	19.7331	8.93476
3300002A11Rik	0	0	0.537562	0.458467
3300002I08Rik	0.504139	0.704707	0.987988	1.59258
3425401B19Rik	0	0	10.0047	0.0567049
3632451O06Rik	0	0	1.84335	0.832265
3830403N18Rik	0.493228	0.40412	0.0884709	0
3830406C13Rik	4.90695	5.22652	5.16208	1.36321
3830408C21Rik	1.13344	1.00214	2.01279	1.64989
3830417A13Rik	0	0	0.149818	0.55985
3830431G21Rik	0.207671	0.325283	1.77631	1.27493
3930401K13Rik	0.306596	4.09362	1.50947	1.98559
3930402G23Rik	0.839634	0.915634	0.218373	0.203422
4430402I18Rik	0.048201	0.153274	2.15639	1.0671
4631405J19Rik	0.241788	0.262604	0.377673	0.466303
4632411B12Rik	49.7705	49.9469	30.1748	33.4559
4632415K11Rik	13.4906	13.0769	9.85308	11.6563
4632415L05Rik	17.0555	16.3812	6.60834	6.41378
4632419I22Rik	76.9545	80.8456	10.3899	6.01834
4632427E13Rik	0.705742	0.301751	0.474004	1.26808
4632428C04Rik	0.0743592	0.0776886	2.49505	2.22945
4632428N05Rik	2.36405	2.68312	57.995	81.7749
4632434I11Rik	10.5332	11.3911	0.129123	0.0848564
4731419I09Rik	1.54354	2.05437	1.63189	1.34099
4732415M23Rik	1.29265	0.288272	0.997791	0.660407
4732416N19Rik	0.478363	0.335188	2.44684	0.497107
4732418C07Rik	34.5258	38.3781	25.1611	14.7014
4732456N10Rik	0	0	0.0309648	0.0288581
4732471D19Rik	21.1908	22.6836	6.05984	4.48583
4732471J01Rik	0.741788	0.640414	29.0025	19.8186
4831426I19Rik	20.191	20.3345	5.56835	10.6021
4831440E17Rik	0.262862	0.3895	1.77502	0.900185
4832428D23Rik	0.245703	0.161744	0.612763	3.2787
4833403I15Rik	0.258487	0.221776	2.22433	2.93065
4833409A17Rik	0.257155	0.489825	0.503236	0.621712
4833413D08Rik	0	0	0	0
4833418N02Rik	0.808849	0.847414	2.28944	2.8773
4833420G17Rik	34.1989	40.7565	26.981	20.072
4833422C13Rik	0.141177	0.115272	0.628394	0.996274
4833422F24Rik	0	0	1.57875	2.15223
4833423E24Rik	0	0	0.503491	0
4833424O15Rik	0	0	0.0125235	0.0696512
4833427G06Rik	0	0	0.240322	0
4833439L19Rik	54.4426	54.4398	141.072	73.5563
4833442J19Rik	12.1737	14.788	11.9327	5.12021
4921501E09Rik	0	0	0	0
4921504E06Rik	0	0	0	0
4921506M07Rik	0.0296603	0.0182443	2.89849	12.4007
4921507P07Rik	2.84648	3.43586	0.654884	0.552657
4921509C19Rik	0.0157174	0.00972327	0	0
4921510H08Rik	0	0	0	0
4921511C04Rik	0	0	0.729423	0.271237
4921511C20Rik	0	0	0	0
4921511H03Rik	0	0	0.0857365	0
4921511M17Rik	0	0.0301639	0	0
4921513D11Rik	0	0.083084	0.126397	0.0295703
4921513D23Rik	32.7524	37.4663	16.5999	11.1391
4921515J06Rik	0.0298409	0.037388	0.100369	0.182348
4921517D21Rik	0	0	0.0126927	0
4921517D22Rik	0	0.0163239	0	0
4921517L17Rik	1.32535	1.6232	1.13685	1.50257
4921521F21Rik	0.286988	0.22747	0.536629	0.552899
4921523A10Rik	0.121611	0.172635	0.10707	0.0296771
4921524J17Rik	24.8609	26.0242	3.96012	2.54511
4921524L21Rik	0	0	0	0
4921528I01Rik	0	0	0	0
4921528O07Rik	0	0	0	0
4921530D09Rik	0.0254619	0.129434	0.340196	0.337621
4921530L21Rik	0	0	0	0
4921531C22Rik	0.866303	0.92574	2.44623	3.68203
4921533I20Rik	0	0	0	0
4921536K21Rik	2.83969	2.97783	1.52642	2.16827
4921539E11Rik	0	0.0222292	0	0
4922501C03Rik	13.7668	14.3278	1.53971	1.0344
4922501L14Rik	0	0.0132273	0	0
4922502D21Rik	0	0	0.138245	0
4922505E12Rik	0	0	0.0129937	0
4922505G16Rik	0.192378	0.153802	0.29376	0.960164
4930402F06Rik	0	0	0.0443883	0
4930402H24Rik	7.97348	8.07316	35.1851	19.908
4930403L05Rik	0	0	0	0
4930403N07Rik	1.65189	1.7963	0.0693912	0.055423
4930404A10Rik	0	0	0	0
4930404H21Rik	0	0	0.19487	0.0457889
4930404I05Rik	2.57109	3.43426	1.08822	0.569549
4930404N11Rik	9.869	9.64913	28.0684	94.8618
4930407I10Rik	0	0	0.00538051	0
4930408F14Rik	0	0	0	0
4930408O21Rik	0	0.153803	0.551665	0
4930412C18Rik	0	0.00689998	0.598316	0.274545
4930412F15Rik	0.0831052	0.178446	1.26664	0.704396
4930412O13Rik	2.62138	3.38882	5.13277	4.33266
4930415F15Rik	0	0	0.0877055	0.0620961
4930415L06Rik	0	0	0	0
4930415O20Rik	0.205621	0.819952	2.79528	1.61625
4930417G10Rik	0.0296166	0	0.1738	0.102255
4930417O13Rik	0.382253	0.413027	2.35348	1.26557
4930420K17Rik	19.5842	21.3956	47.0354	46.3086
4930422G04Rik	8.25499	9.75407	0.672879	0.582688
4930426L09Rik	0.271252	0.222461	0.806864	1.10527
4930427A07Rik	20.8669	22.149	3.05952	4.8128
4930428D18Rik	0	0	0	0
4930428E23Rik	0	0	0	0
4930429B21Rik	0.472703	0.343725	0.567263	0.756155
4930429F11Rik	0	0	0	0
4930430A15Rik	0	0	0	0
4930430D24Rik	0	0	0	0
4930430F08Rik	21.929	22.3723	5.27252	3.03478
4930431A04Rik	0	0	0	0.0776518
4930432E11Rik	0	0	0	0
4930432F04Rik	0	2.4432	16.7875	17.5618
4930432K09Rik	0	0	0	0
4930432K21Rik	4.667	4.64613	1.06766	1.20049
4930433I11Rik	0	0	0	0
4930433N12Rik	0.0655149	0.0452863	22.6684	5.61717
4930434E21Rik	0	0	0.115112	0
4930435E12Rik	0	0	0	0
4930441O14Rik	0.0576017	0.0197881	0.284594	0.198816
4930442L01Rik	0	0	0.0651094	0
4930443G12Rik	0	0	0	0
4930444A02Rik	15.3945	15.25	7.91741	4.43661
4930444G20Rik	0.127362	0.106194	0.0459908	0.0747399
4930447C04Rik	0.087771	0.0810055	0.274009	0.209456
4930448K20Rik	0	0.0386496	0.137018	0.0549202
4930449A18Rik	0	0	0	0
4930449E01Rik	0	0	0	0
4930449I24Rik	0.0398881	0.0628014	0	0
4930451C15Rik	0.351995	0.670823	2.83779	1.32752
4930451I11Rik	0	0	0	0
4930452B06Rik	0.183378	0.103451	0.0352301	0.197929
4930453N24Rik	56.2636	54.6435	13.2189	17.2982
4930455C21Rik	23.3962	22.9185	10.1838	16.9166
4930455F23Rik	17.2683	17.7537	1.73386	1.20385
4930458L03Rik	0	0	0	0
4930465K10Rik	0.410797	0.209682	0.02274	0.0332585
4930467E23Rik	0.0527556	0.176911	0	0.100073
4930468A15Rik	0	0	0	0
4930469G21Rik	0.101974	0	0	0.0452321
4930470P17Rik	0	0	0.100995	0
4930471G03Rik	0	0	0	0
4930471M23Rik	17.6718	18.3421	46.9305	45.7939
4930473A06Rik	1.5693	1.80816	2.57391	1.28066
4930474M22Rik	0	0	1.17784	0.335511
4930474N05Rik	0.141606	0.137455	0.156985	0.0282359
4930479M11Rik	0	0	0.133478	0.0690082
4930480E11Rik	0	0	0	0
4930481A15Rik	0.0760692	0.0251198	7.83686	6.30243
4930483J18Rik	0.508367	0.320726	0.290116	0
4930485B16Rik	0.069231	0.0683152	0.554347	0.702792
4930486L24Rik	4.3929	4.1428	0.669377	0.341569
4930488L21Rik	0	0	0.0290139	0.0406247
4930502E18Rik	0	0.0947377	0.048168	0.0338454
4930503B20Rik	0	0.517169	0.149097	0.0401347
4930503E14Rik	2.34787	2.3254	0	0
4930503E24Rik	0	0	0.0426482	0
4930503H13Rik	0	0	0	0
4930503L19Rik	24.9316	28.9333	6.78694	4.89851
4930504O13Rik	0	0	0	0.0871531
4930505A04Rik	0.0516586	0.0317504	0.130089	0.0458516
4930506M07Rik	57.444	61.0075	4.26372	1.92774
4930507D05Rik	0.581203	0.543032	1.22329	4.67714
4930511I11Rik	0	0.0262602	0.0802958	0.263564
4930511M06Rik	4.90004	6.02671	5.60722	2.46031
4930511M11Rik	0.313198	0.329842	0.727306	0.187983
4930512B01Rik	0.255077	0.294845	0.160571	0.138665
4930512M02Rik	8.62974	10.1884	0.908053	0.135283
4930513N10Rik	0.524551	0.54407	0.379526	0.919601
4930515G01Rik	0.183913	0.226195	0.712351	0.871532
4930515G16Rik	0	0	0	0
4930519F09Rik	5.53103	7.59384	9.16431	4.29111
4930519F16Rik	0	0.0262032	0	0
4930519G04Rik	0.0297187	0.264464	0.350951	0.628059
4930521A18Rik	0	0	0	0
4930522H14Rik	0	0	0	0
4930523C07Rik	9.25922	10.1252	27.799	25.0235
4930524B15Rik	0	0	0.0137048	0.0191833
4930524E20Rik	0	0	0	0
4930524L23Rik	0.242781	0.234094	0.448201	0.398628
4930525F21Rik	0.0341258	0.0341171	0	0
4930526D03Rik	0.221508	0.226696	0.705398	0.73339
4930526I15Rik	3.0965	3.25629	11.8018	52.8955
4930528A17Rik	0.406682	0.462256	0.240004	0.211698
4930528F23Rik	0.335942	0.286038	0.272791	0.127432
4930529C04Rik	0	0.0587713	0.0251057	0.0119387
4930529F22Rik	0	0	0.0304105	0
4930529M08Rik	0.0759948	0.283097	0.455136	0.484766
4930534B04Rik	7.23143	7.75297	5.98578	3.03868
4930538K18Rik	0.208095	0.146286	1.7209	0.570875
4930539E08Rik	0.170675	0.267967	0.746272	0.887039
4930539J05Rik	1.59749	1.5277	1.76489	1.9652
4930542N07Rik	0	0	0	0
4930544D05Rik	0	0	6.48999	0.686134
4930544G11Rik	0	0	0	0.026715
4930544O15Rik	0	0.0380553	0.666477	0.166245
4930546H06Rik	3.75171	5.22259	7.86796	7.35289
4930547C10Rik	0	0	0	0
4930547N16Rik	12.963	14.0371	0.200345	0.127471
4930548H24Rik	0.0315707	0.0388361	0	0
4930549C01Rik	0	0	0	0
4930550C14Rik	0.149088	0.18336	0.232907	0.196324
4930550L24Rik	0	0	0.0344129	0
4930555G01Rik	0.0439848	0.0173855	0.0130497	0
4930555I21Rik	0.14641	0.0416363	0.252641	0.181036
4930557A04Rik	0	0	0	0
4930558C23Rik	0	0	0.136281	0
4930562C15Rik	1.28722	1.39547	4.09256	4.30675
4930562F07Rik	0.264482	0.225405	0.776621	0.312435
4930563D23Rik	0	0.009676	0.00971671	0.0135803
4930563E22Rik	0.20792	0.346244	0.315939	0.0745517
4930564B18Rik	0	0	0	0
4930567H12Rik	0	0.0312977	0	0.1226
4930567H17Rik	0	0	0	0
4930568D16Rik	0	0	0	0
4930571K23Rik	0	0	0.0246802	0.0172641
4930572J05Rik	2.57713	2.74448	18.7991	44.6323
4930578C19Rik	0	0	8.19141	6.86448
4930578G10Rik	0	0	0.835408	0.773248
4930578I06Rik	0	0	0.0837455	0
4930578N16Rik	2.94923	3.08949	0.0320716	0.0661988
4930579C15Rik	0.292342	0.261354	0.563773	0.12825
4930579F01Rik	0.0277503	0	0	0
4930579G22Rik	2.64186	2.14462	7.04482	20.966
4930579G24Rik	13.0602	12.9394	2.75312	3.21947
4930579J09Rik	1.82182	2.12656	0.848366	0.478138
4930579K19Rik	0	0.139337	0.2774	0.157717
4930581F22Rik	7.34767	10.0154	6.9615	4.20225
4930583H14Rik	0.36066	0.234686	0.161781	0.259734
4930583K01Rik	0.0561726	0	0.0708945	0.150095
4930584F24Rik	0	0	0	0
4930588N13Rik	0	0	0	0
4930590J08Rik	0.0610788	0.06015	0.0979672	0.0736659
4930592I03Rik	0.408688	0.150256	0.574991	1.02536
4930594C11Rik	0.251947	0.330594	0.377884	0.329975
4930595M18Rik	0	0	0	0
4930596D02Rik	0	0	0	0
4931406B18Rik	0.106648	0.111214	0.243556	0.0686499
4931406C07Rik	24.6331	25.905	29.9212	16.1177
4931406H21Rik	0.319431	0.681575	0.930282	0.749084
4931406P16Rik	39.6185	41.4095	30.8787	36.5187
4931407G18Rik	0	0	0	0
4931408A02Rik	6.61144	5.83603	1.7128	3.20011
4931408C20Rik	0	0	0	0
4931409K22Rik	0	0	0	0.0272602
4931414P19Rik	6.79678	6.72662	3.23214	4.77212
4931417E11Rik	0	0	0	0
4931417G12Rik	1.63795	1.66526	0	0.0585204
4931423N10Rik	0.0473283	0.0436775	0	0
4931428F04Rik	6.85982	8.46787	3.55704	7.04427
4931428L18Rik	0.905835	0.628354	2.37918	1.027
4931429I11Rik	0	0	0.126105	0.0117294
4931429L15Rik	0.17523	0.342518	0.174143	0.112963
4931431F19Rik	0	0	0.0140903	0.0197259
4931432M23Rik	0	0	0.0380263	0.0537251
4931440F15Rik	0.0266971	0.0164843	0.134581	0.281231
4931440L10Rik	0	0.0205238	0	0
4931440P22Rik	1.4984	1.23512	2.69103	9.34986
4932411E22Rik	0.0158114	0.0194612	0.283388	0.368763
4932411G14Rik	0	0.00662728	0	0.00926544
4932411N23Rik	0	0.0349898	0.259397	0.11746
4932412H11Rik	0.0567063	0.15705	0.411453	1.00292
4932414J04Rik	0	0	0	0
4932414N04Rik	0.068156	0.111676	0.302714	0.22066
4932415G12Rik	5.7479	6.52625	3.62129	2.14295
4932415M13Rik	0	0	0	0
4932416H05Rik	0.780652	0.679625	2.11978	3.13949
4932417I16Rik	0.705683	0.657283	8.01843	9.97015
4932418E24Rik	0	0	0.35953	0.330991
4932425I24Rik	0.167184	0.121597	0.0361343	0.0524901
4932429P05Rik	0	0	0	0
4932435O22Rik	0	0	0.143185	0.0315134
4932438A13Rik	13.8718	14.7977	8.93263	4.92197
4932438H23Rik	0.0784559	0.11588	0.271519	0.0948699
4932441B19Rik	0	0	0.0301911	0
4932441J04Rik	0	0	0	0.13074
4932442L08Rik	0	0.00958763	0	0
4932443I19Rik	0.206382	0.300698	0.401716	0.285924
4933400A11Rik	0	0	0.0257339	0.0361869
4933400C05Rik	0.0422975	0.0780169	0.0264998	0
4933400F21Rik	0.0114456	0.0211348	0.635761	0.386465
4933401B06Rik	0	0	0	0
4933402E13Rik	0	0	0.0139271	0
4933402J07Rik	0	0	0	0
4933402N03Rik	0	0	0	0
4933402N22Rik	0	0	0	0
4933402P03Rik	0	0	0.0170478	0
4933403F05Rik	17.8412	17.9441	6.18039	2.88562
4933403G14Rik	0	0	1.07147	2.37966
4933403O08Rik	0	0	0	0
4933404M02Rik	0.0250712	0.0154241	0.0923233	0
4933404O12Rik	14.041	14.4299	2.10277	1.17839
4933405L10Rik	0.128979	0.449355	0.0808358	0.677657
4933405O20Rik	0	0	0	0
4933406F09Rik	0	0	0	0
4933406I18Rik	0	0	1.12865	7.54244
4933406J08Rik	0.0203592	0.0125273	0	0
4933406K04Rik	0	0	0.0839404	0
4933406M09Rik	0.346347	0.273958	0.0153596	0.0215132
4933407C03Rik	43.0577	43.518	33.5976	55.1001
4933407H18Rik	6.34717	7.69267	8.35146	6.8566
4933407K13Rik	5.2666	5.24552	8.61167	9.90749
4933407L21Rik	0	0	0.433302	0.215029
4933407P14Rik	0	0	0.0833022	0.049938
4933408B17Rik	0.108072	0.23058	0.355892	0.264935
4933409G03Rik	0	0	0	0
4933409K07Rik	0	0	0	1.68925e-09
4933411G11Rik	0.0198742	0.0167276	0	0
4933411K16Rik	2.16046	2.45925	0.8441	0.761409
4933411K20Rik	21.5352	21.2453	6.31076	3.72509
4933412E24Rik	0.0250073	0	0	0
4933413G19Rik	0.130375	0.106712	0.0541942	0.0381237
4933415F23Rik	0	0	0.061126	0.0427514
4933416C03Rik	0.0189521	0	0	0
4933416I08Rik	0	0	0	0
4933417A18Rik	0	0	0.115248	0.0402796
4933417G07Rik	0	0	0.413607	0
4933421E11Rik	19.1331	22.2216	3.25837	3.54693
4933421I07Rik	0	0	0.0411586	0
4933421O10Rik	1.82283	2.26128	4.00077	6.98819
4933422H20Rik	0	0.0138098	0.403652	0.623512
4933424B01Rik	24.8237	27.9723	9.75501	12.1155
4933425L06Rik	0	0	0	0
4933425O20Rik	0.0969675	0.0852478	0.0878911	0.621394
4933426I21Rik	3.8654	4.71956	0.738606	0.558652
4933426M11Rik	20.2279	20.6437	37.9281	39.7515
4933427D06Rik	0.147785	0.206406	0.663148	0.0289492
4933427D14Rik	9.426	9.5503	1.39993	1.99652
4933427E11Rik	0.0762103	0.117158	0.047643	0.502097
4933427G17Rik	0.0461856	0.0568318	0.65897	0.461306
4933429O19Rik	0.144052	0.0708883	0.957387	0.150784
4933430H15Rik	0.265122	0.360364	1.05442	1.43112
4933430I17Rik	0.425124	0.600005	0.228497	0.04267
4933431E20Rik	1.05271	1.29853	4.00207	1.83714
4933432B09Rik	1.27426	1.74178	1.15887	0.548569
4933432I09Rik	0.0150433	0.018529	0.291267	0.142356
4933433C11Rik	0.0314946	0.0193713	0.183071	0.371306
4933433P14Rik	30.7049	27.5901	14.3573	6.24496
4933434E20Rik	85.9018	91.2559	33.7074	17.0384
4933434I20Rik	0	0	0	0
4933436C20Rik	0.0372367	0	3.62983	5.52439
4933436I01Rik	0	0	0	0
4933437F05Rik	0.511306	0.550343	1.17496	0.838242
4933439C10Rik	13.9272	18.2582	17.1748	17.0865
4933439F18Rik	32.5469	32.0106	38.9845	53.0008
4F2 lc	0	0	0	0
5031410I06Rik	0.113866	0.17634	0	0
5031414D18Rik	0.0159012	0.107644	6.98766	6.71708
5031425F14Rik	0	0.033248	1.39421	1.97739
5031426D15Rik	0.141412	0.263193	0.566855	0.204589
5031434O11Rik	0.221091	0.31678	5.81991	3.59312
5031439G07Rik	22.7819	22.8293	32.3624	35.9915
5033404E19Rik	0	0.0459431	0.0953588	0
5033406O09Rik	4.57646	4.87943	1.76457	1.28048
5033411D12Rik	0.635722	0.690648	2.79097	1.30807
5033414D02Rik	68.8145	76.5834	34.3998	54.8445
5033414K04Rik	0	0	0.0537581	0.0373925
5033421C21Rik	0	0	0.131392	0.0366001
5133401N09Rik	17.7509	17.9559	13.7884	12.0085
5330413P13Rik	0.0113792	0	0.0280674	0.0489867
5330417C22Rik	0.0124841	0.0307354	1.79469	2.05459
5330426P16Rik	10.9876	12.3209	6.52158	6.28778
5330429B09Rik	2.67868	3.11566	1.43062	1.68742
5330434G04Rik	0.012023	0.0147888	0.0666945	0.0310441
5330437I02Rik	0.0562752	0.211297	0.492123	0.439132
5330439B14Rik	0	0	0.164296	0.0284158
53BP1	3.24335	2.94984	1.64706	3.17131
5430401F13Rik	0.0940062	0	0	0
5430402E10Rik	0	0	0	0
5430402O13Rik	0.207729	0.319182	1.37336	1.79807
5430405G05Rik	1.18405	1.55759	0.314772	0.269955
5430405H02Rik	5.7058	4.6616	6.88084	7.79044
5430407P10Rik	12.6616	12.0532	2.43489	4.6109
5430411K18Rik	12.2845	12.7162	11.5855	8.60031
5430413K10Rik	0	0	0.0768001	0.0179106
5430416N02Rik	123.074	136.971	8.35923	9.40359
5430416O09Rik	0.124108	0.130882	6.58851	5.40576
5430417L22Rik	13.0754	13.0243	11.7193	26.7026
5430419D17Rik	0.0142954	0	1.67105	2.1867
5430421N21Rik	0	0	0.11541	0.206159
5430427O19Rik	0.0982775	0.0873777	0.574626	0.420252
5430435G22Rik	0.359515	0.305277	9.77945	8.07837
5430437P03Rik	72.319	73.0648	82.3718	107.71
544988	0	0	0	0
547127	0	0	8.83708e-05	0
5530400C23Rik	0	0	0	0
5530601H04Rik	7.03994	8.15344	5.62182	2.55905
5730403B10Rik	14.5218	16.033	77.2545	55.4407
5730409E04Rik	12.836	13.062	20.1668	19.6644
5730416F02Rik	0.125126	0	0.0791838	0.111941
5730419I09Rik	8.55255	9.30438	6.53637	5.00499
5730422E09Rik	0.100865	0.0930795	0.485453	0.197425
5730437N04Rik	88.8304	85.2861	6.9216	4.61531
5730446D14Rik	5.00263	5.85672	0.300025	0.69274
5730455O13Rik	39.3722	38.9862	3.52709	3.06449
5730455P16Rik	21.8599	22.1173	5.46944	2.76765
5730469M10Rik	56.7883	61.0908	53.4408	58.631
5730494M16Rik	3.6903	4.18873	8.91316	4.13765
5730494N06Rik	28.4469	28.5536	33.8265	39.875
5730507C01Rik	6.75767	7.37991	0.859585	0.84021
5730508B09Rik	7.80983	9.03889	3.79991	10.8025
5730522E02Rik	0	0	0.250111	0
5730528L13Rik	23.5167	26.6956	6.39895	2.91549
5730559C18Rik	29.6902	29.5794	2.89904	4.85001
5730577I03Rik	4.39594	4.24224	3.92174	2.06867
5730590G19Rik	12.2276	12.4021	0.411447	0.660979
5830403L16Rik	0.149499	0.198963	0.450132	0.142384
5830405F06Rik	0	0	0.0979455	0.0938901
5830405N20Rik	0	0	7.04195	7.29042
5830411N06Rik	0	0	2.54968	4.24211
5830415F09Rik	2.07187	1.96295	6.19173	6.66539
5830416P10Rik	21.8567	26.195	3.04498	3.02942
5830417I10Rik	1.0859	1.35515	0.968438	0.606912
5830418K08Rik	21.0177	23.746	3.30082	1.39577
5830427D03Rik	0.116873	0.251618	1.30914	1.50417
5830432E09Rik	0.473051	0.446821	3.19941	3.65449
5830433M19Rik	20.3607	21.1939	1.38887	6.48346
5930403L14Rik	0.0401151	0.0295303	5.24236	7.01373
5930412G12Rik	0.141554	0.130579	18.0307	8.59979
5930416I19Rik	43.0089	43.6048	6.98953	9.98986
5930434B04Rik	26.8731	29.2767	75.8506	63.9897
6030405A18Rik	0	0	0.0584089	0.0349677
6030408B16Rik	0.442649	0.636405	7.94003	3.45635
6030419C18Rik	9.47476	10.0709	11.7323	20.9484
6030422M02Rik	0.444827	0.72627	1.44301	0.362366
6030429G01Rik	0	0.0240802	9.78351	16.6958
6030446N20Rik	4.416	4.66108	6.56214	4.46403
6030458C11Rik	31.8964	39.9215	10.2418	7.29507
6030468B19Rik	0.570801	0.836817	1.59683	5.03638
6030498E09Rik	0	0	0	0
6230400D17Rik	0.998942	0.996556	1.11601	2.60427
6230409E13Rik	20.0374	20.0393	1.46075	0.849031
6230427J02Rik	0.615398	0.513462	30.8983	40.5316
6330403A02Rik	0	0	0.637144	0.941309
6330403K07Rik	0.380955	0.385003	0.913458	1.09052
6330406I15Rik	0.547123	0.525161	20.9513	29.2992
6330407A03Rik	0.165549	0.145504	0.880513	0.815179
6330407J23Rik	0	0	0.0193229	0.0359638
6330408A02Rik	6.08173	6.55831	2.66675	4.12693
6330409N04Rik	35.02	35.2191	11.7883	16.9789
6330416G13Rik	8.60548	8.09462	13.6999	15.2135
6330439K17Rik	0.780893	0.758787	1.77774	0.772516
6330503K22Rik	8.41141	9.31652	0.295029	0.398493
6330512M04Rik	0.040298	0.0991124	13.2943	30.4132
6330527O06Rik	0	0.013554	0.163897	0
6330545A04Rik	0.92136	1.22697	1.15982	1.08999
6330549D23Rik	0.595731	0.769995	0.953297	0.316444
6330577E15Rik	185.481	191.929	88.7882	67.2908
6330578E17Rik	62.3607	62.5487	106.14	45.3554
6430411K18Rik	0	0	0	0
6430526N21Rik	2.34645	3.42108	0	9.17547
6430527G18Rik	58.4547	56.6215	31.0975	106.904
6430531B16Rik	0	0.0542917	0.360761	0.356134
6430548M08Rik	2.74855	2.41691	12.143	53.4303
6430550D23Rik	0.813667	1.19587	2.3788	1.57695
6430562O15Rik	0.381015	0.437419	1.09264	0.641992
6430571L13Rik	0.513203	0.316018	10.2135	2.13338
6430573F11Rik	0.0525268	0.0601881	0.218596	0.137569
6430598A04Rik	7.41342	8.12372	1.56386	3.7829
6430704M03Rik	0	0	0.00674518	0
6530401D17Rik	0	0	5.05292	24.8767
6530401N04Rik	22.5687	20.5788	4.5203	7.03231
6530411M01Rik	0	0	0.0237041	0.0333066
6530418L21Rik	0.248632	0.423896	3.29894	1.91479
6620401K05Rik	0.21462	0.977088	1.04192	0.698358
6720401G13Rik	62.0913	83.2806	34.4169	18.5444
6720456B07Rik	129.456	123.246	244.044	127.988
6720456H20Rik	3.94549	4.4484	9.07641	16.7175
6720463M24Rik	15.7828	18.9165	2.44288	1.46025
6720489N17Rik	15.0462	14.3454	0.453566	0.211334
6820408C15Rik	0	0.0707326	0.256631	0.120093
6820431F20Rik	483.529	564.449	124.042	64.6968
6D	0	0	0	0
7420426K07Rik	0	0	0	0
7420461P10Rik	0	0.0395472	0.326411	0
7530420F21Rik	12.2826	12.1457	0.0538302	0.189325
8030411F24Rik	0	0	0	0
8030462N17Rik	26.6369	26.8489	12.6125	6.16015
8430406I07Rik	14.1141	14.1526	4.93919	2.57878
8430408G22Rik	0.243086	0.234927	34.4778	61.4941
8430410A17Rik	47.7869	48.1029	16.7346	19.2402
8430410K20Rik	59.6585	62.9459	4.01272	1.12664
8430419L09Rik	14.2583	15.0262	12.3848	11.4926
8430427H17Rik	2.73684	3.0421	7.51189	7.28996
8430429K09Rik	1.34809	1.21435	0.361551	0.678775
8430431K14Rik	0.016105	0	0.180684	0.0272593
9030025P20Rik	15.9906	21.7601	7.69059	4.06591
9030224M15Rik	0.145874	0.197406	2.92295	6.18571
9030409G11Rik	1.17488	0.883186	4.17956	8.23753
9030418K01Rik	0	0	4.62238	3.84009
9030425E11Rik	0.14897	0.0713036	15.5355	29.6104
9030612E09Rik	0.167357	0.101418	0.871996	0.284891
9030617O03Rik	12.1642	13.1016	20.998	11.742
9030619P08Rik	0	0	0.95048	0.430963
9030624J02Rik	33.6723	34.766	22.9377	15.7547
9030625A04Rik	12.2729	12.3099	12.1939	8.78311
9130008F23Rik	6.35654	6.75929	3.71527	2.2202
9130011E15Rik	9.32939	10.2772	12.4154	7.57858
9130011J15Rik	41.0819	38.6264	47.4118	22.1125
9130014G24Rik	0.0219618	0.00675899	0.273972	0.237314
9130017N09Rik	35.0439	33.6265	0.658331	0.676814
9130019O22Rik	1.45727	1.5346	3.08058	3.46266
9130019P16Rik	0.00941659	0.00575044	0.12197	0.0734957
9130023H24Rik	1.68991	1.64816	2.79827	1.91142
9130024F11Rik	1.74788	1.31306	0.0231784	0.130246
9130204L05Rik	0	0	0	0
9130206I24Rik	15.0215	16.5051	1.48585	3.22704
9130208E07Rik	1.4923	3.13803	3.51682	1.49548
9130209A04Rik	0.320292	0.2458	0.0513612	0
9130221H12Rik	10.1276	11.1395	12.2222	10.6925
9130230L23Rik	1.67392	2.15056	2.05986	1.01639
9130401M01Rik	106.876	109.57	24.9956	49.4303
9130404H23Rik	0	0	0.0452691	0
9130409I23Rik	0.0228906	0.0281698	0.0852075	0.178903
9230019H11Rik	0.0149894	0.046125	0.467113	0.297618
9230102K24Rik	0	0	0	0
9230104L09Rik	0.663104	0.356125	0.477401	0.301515
9230105E10Rik	13.1952	15.0463	11.0452	7.55093
9230107M04Rik	0	0	0	0
9230109A22Rik	0.023494	0.0144706	0	0.0204114
9230110C19Rik	11.5	11.3131	5.12142	4.70981
9230110F15Rik	0	0	0	0
9230112D13Rik	0	0	0.0419402	0
9230113P08Rik	0.285112	0.315454	0.310979	0.0378418
9230114K14Rik	1.61676	1.7285	1.42484	0.601628
9230115E21Rik	0.2241	0.335837	0.227062	0.0948486
9230116N13Rik	0.635756	0.606501	0.792255	1.14064
9330020H09Rik	0.612838	0.935575	1.06136	1.16768
9330101J02Rik	0.0195089	0.0776485	0.338461	0.28059
9330111N05Rik	0.0641747	0.0394709	0.466203	0.744122
9330129D05Rik	3.29849	3.80477	19.3464	11.1088
9330133O14Rik	0.354044	0.361759	1.71648	1.59729
9330151L19Rik	2.3175	2.98675	14.5112	11.4827
9330158H04Rik	0.775945	0.833336	0.92408	0.826384
9330159F19Rik	0.178207	0.250657	1.31724	0.469504
9330171B17Rik	0.373745	0.723215	0.386338	0.189402
9330175E14Rik	1.85477	2.78097	5.55399	4.65199
9330176C04Rik	0.847503	0.704158	1.12104	1.09252
9330182L06Rik	0.315303	0.535776	0.0356139	0.0755624
9430007A20Rik	0	0	0	0
9430008C03Rik	32.9126	40.4305	12.2277	10.4862
9430015G10Rik	56.4089	67.7827	23.3224	19.7644
9430016H08Rik	30.14	29.7331	15.7913	31.7562
9430020K01Rik	22.8406	22.9121	13.1658	7.16768
9430021M05Rik	0	0.0767162	0.0772525	0.0180167
9430023L20Rik	42.9249	43.6548	29.7812	29.8162
9430031J16Rik	0.0400963	0.0275	0.0627164	0.0887077
9430038I01Rik	5.76245	6.00722	8.92464	10.8684
9430041J12Rik	0.0368707	0.0226887	0.289608	0.0319116
9430060I03Rik	0.0848123	0.103234	0.21577	0.373448
9430069I07Rik	0	0	0.336663	0.28335
9430070O13Rik	0.0408882	0.201273	0.0126652	0
9430076C15Rik	1.14321	0.991969	0.408544	0.669179
9430083A17Rik	0.651521	0.775637	0.645966	0.484398
9530002B09Rik	0	0	0	0
9530003J23Rik	0.0448109	0	0	0
9530008L14Rik	0.169517	0.162517	12.3557	3.74438
9530009M10Rik	6.98367	7.16224	1.51056	0.51902
9530026P05Rik	1.4704	1.93094	3.936	1.98244
9530036O11Rik	0.0145408	0.0202358	0.216754	0.202243
9530053A07Rik	0.0441034	0.0918724	0.814043	0.4475
9530059O14Rik	0	0	0.205146	0.152304
9530068E07Rik	198.744	212.018	107.939	229.474
9530077C05Rik	4.97037	5.35305	0.889866	0.749444
9530082P21Rik	6.69892	7.46605	16.5381	8.43538
9530091C08Rik	0.0645347	0.146849	1.91996	0.507781
9630013A20Rik	0	0	0	0
9630014M24Rik	0.0958498	0.0868464	0.170683	0.119132
9630028B13Rik	0.654024	0.837024	0.447053	0.204747
9630028H03Rik	0	0.0114737	0.0923234	0
9630033F20Rik	10.2566	10.3315	8.40915	2.47249
9830001H06Rik	7.50251	7.48875	7.58338	10.7963
9830107B12Rik	0.0833952	0.0698315	0.298473	0.169656
9930012K11Rik	6.92414	7.0885	3.20958	2.97528
9930013L23Rik	0	0	0.16333	0.175457
9930014A18Rik	5.20319	4.84233	1.1498	1.75721
9930021D14Rik	0	0	1.23887	1.99884
9930021J03Rik	12.9127	13.3441	6.0094	3.42394
9930022D16Rik	0.0155543	0	0	0
9930023K05Rik	2.51313	2.9614	0.6947	0.323806
9930032O22Rik	0.0615482	0.0818066	0.0901864	0.0378084
9930104L06Rik	10.7312	12.9567	7.83774	6.97153
9930111J21Rik1	6.98808	6.6618	18.0155	15.6447
9930111J21Rik2	2.46232	2.53336	3.68234	1.3769
A030009H04Rik	0.0983976	0.136206	1.40501	0.42779
A130010J15Rik	6.93283	7.4076	4.65318	2.2803
A130022J15Rik	17.8557	18.5221	12.8204	6.63963
A130040M12Rik	72.8366	78.5157	400.76	449.567
A130049A11Rik	0.817381	1.21054	0.218703	0.287952
A1bg	0	0	0.51998	0.145632
A1cf	0	0	0	0.184484
A230020J21Rik	0.651016	0.48954	1.38973	22.2955
A230046K03Rik	26.7381	30.1859	2.97747	1.96733
A230050P20Rik	13.8914	15.8079	48.1425	99.0008
A230051G13Rik	1.74089	1.67665	5.97587	8.1087
A230056P14Rik	5.86957	6.38935	4.33439	2.59695
A230057D06Rik	0.0256619	0	0.828886	0.312637
A230065H16Rik	0	0	1.54169	3.7019
A230072C01Rik	3.68613	5.41647	11.4595	4.95908
A230072E10Rik	0.834812	0.950809	0.767644	2.17764
A230073K19Rik	0.11128	0.0676705	0.0414316	0.0193275
A230083G16Rik	1.02158	1.1961	4.80075	8.70186
A230107C01Rik	0.013069	0.0756339	2.12675	0.832548
A2ld1	19.3382	21.7291	25.7033	26.9509
A2m	0	0	0.0536371	0.0374203
A330008L17Rik	0	0	0	0
A330021E22Rik	5.87376	8.61359	0.334526	0.487687
A330023F24Rik	0.322111	0.340345	2.62818	0.826915
A330035P11Rik	1.00395	1.04641	0.908323	0.816649
A330040F15Rik	1.27719	0.994641	1.65392	3.03956
A330049M08Rik	0.676142	0.700792	9.62012	7.24696
A330050B17Rik	0.357159	0.535929	0.769946	0.76067
A330050F15Rik	0	0	0	0
A330069E16Rik	6.23328	7.94124	0.991211	0.499585
A330070K13Rik	0	0	0	0
A330076H08Rik	0	0	0.239289	0.207636
A3galt2	0.367045	0.497012	0.528344	0.41107
A430005L14Rik	56.9372	52.0048	24.3011	32.2366
A430033K04Rik	5.23919	5.40359	2.7138	8.33235
A430078G23Rik	9.1059	9.40021	8.66335	11.7862
A430084P05Rik	0	0	5.9663	4.73629
A430089I19Rik	0	0	0	0
A430093F15Rik	0.0964557	0.118582	3.45514	3.86352
A430105I19Rik	20.5083	24.0016	7.49643	3.79253
A430107O13Rik	0.765456	0.809237	17.4372	10.1915
A430110N23Rik	0.317552	0.272474	16.831	18.0867
A4galt	0.0884617	0.0275881	18.172	19.0635
A4gnt	0.0152458	0	0.103617	0
A530013C23Rik	0.66477	0.63318	2.19537	0.645257
A530016L24Rik	0.0639939	0.0886108	168.976	224.253
A530021J07Rik	0	0	0.714257	0.79687
A530023O14Rik	0.289414	0.626392	1.75552	0.936694
A530032D15Rik	0.0501492	0.0161305	0.621097	0.419862
A530053G22Rik	0	0.0377139	1.80868	0.261379
A530054K11Rik	6.33912	6.91556	1.9989	0.706333
A530058N18Rik	0	0	0	0
A530064D06Rik	0.122747	0.448711	2.85042	0.889755
A530088E08Rik	0.0243549	0.0599352	1.08022	2.20884
A530095I07Rik	0.0592269	0.036392	0	0
A530098C11Rik	0.223275	0.211727	5.68247	0.1181
A530099J19Rik	0.121213	0.0869366	4.56518	2.70787
A630001G21Rik	4.65793	5.82157	6.66263	7.65599
A630005I04Rik	0.014095	0	0.452588	0.316152
A630007B06Rik	35.0893	34.7709	2.96158	3.14848
A630010A05Rik	0.888093	1.44622	2.8911	1.52305
A630012P03Rik	0	0	0.163248	0.0190414
A630033H20Rik	0.0865793	0.0817493	3.99058	2.04642
A630036L10Rik	0	0	0	0.833252
A630042L21Rik	0.0527973	0.0842018	0.397692	0.308778
A630052C17Rik	1.76969	2.26727	3.7521	2.45665
A630055G03Rik	6.08915	6.40773	2.94056	5.80185
A630066F11Rik	1.77006	1.53864	1.70125	2.63959
A630072M18Rik	1.67887	1.9003	2.91069	3.76636
A630073D07Rik	0.572041	0.959027	1.05982	0.610238
A630075F10Rik	0.408547	0.519145	1.97747	1.53982
A630089N07Rik	27.3536	31.56	4.0129	1.9702
A630091E08Rik	0	0	0.193498	0.109381
A630095E13Rik	0.711135	1.03641	0	0
A730008H23Rik	31.3908	33.7719	15.4128	6.12487
A730011L01Rik	12.3429	13.3664	9.76529	11.3527
A730017C20Rik	0	0	0.118633	0.0622978
A730017L22Rik	8.2093	10.2126	46.9343	54.9167
A730018C14Rik	0	0	0	0
A730020M07Rik	0	0.0110384	0.939621	0.386383
A730037C10Rik	0.290025	0.445587	2.5144	0.650703
A730069N07Rik	0	0	2.74822	1.44035
A730085E03Rik	0	0	0	0.136608
A830007P12Rik	18.9389	18.4423	29.7927	49.6799
A830010M20Rik	3.9736	4.78963	1.01928	0.543313
A830018L16Rik	0.19252	0.25044	2.11654	2.19236
A830019P07Rik	0.0246303	0	0.0764563	0
A830080D01Rik	16.2317	18.4893	1.03541	0.488544
A830082N09Rik	1.80117	2.82582	3.08534	1.28268
A830093I24Rik	0	0	0.287031	0.721545
A930001N09Rik	17.1357	18.7048	8.02235	3.84253
A930003A15Rik	0	0	0.308052	0
A930003O13Rik	0.0906348	0.0832415	0.165776	0.389922
A930004D18Rik	7.14275	6.85653	1.12672	1.45924
A930005H10Rik	14.5614	15.0701	27.8367	46.976
A930005I04Rik	0	0.0185066	0.882429	1.11629
A930007I19Rik	0.858238	1.3581	3.03852	2.98899
A930011G23Rik	0.0127175	0.036676	0.128292	0.0813114
A930012L18Rik	0.282221	0.335205	0.836087	1.54594
A930013B10Rik	0	0	0.238556	0.167991
A930013F10Rik	5.37416	6.88359	3.0211	3.07349
A930015D03Rik	8.79772	9.26503	27.7431	15.4572
A930017M01Rik	0.01254	0.00771823	0.145231	0.0972506
A930018M24Rik	3.1628	3.11656	13.8718	0.986897
A930018P22Rik	0	0	0.469688	2.15761
A930038C07Rik	0	0	0.869502	2.70356
AA387883	0	0	0.0489232	0
AA388235	1.07896	1.15696	1.23747	0.645309
AA408296	15.9543	17.1588	6.35852	4.26566
AA415398	1.696	1.62785	2.65065	1.49213
AA465934	11.6383	12.6991	20.749	17.7656
AA467197	3.93433	4.48403	0.223753	0.292301
AA474331	11.4476	12.1748	4.5563	6.79982
AA543186	0.576007	0.54846	0.762818	0.693116
AA545190	0	0	0	0
AA619741	0	0	0	0
AA792892	0.0311733	0.0989147	0.0245596	0
AA881470	14.3948	15.4126	32.6427	54.876
AA960436	36.2314	36.1012	31.6547	30.2783
AA986860	0.23364	0.350569	2.10652	1.47455
AA987161	6.46164	7.22002	0.760237	0.245816
AASDH	1.54914	2.35656	2.65372	1.49097
AB013468	0	0	5.40362	36.8109
AB033515	5.12377	11.7328	0	0
AB033524	1538.94	1477.98	8.13875	0.910044
AB056442	0	0	0.0163194	0
AB099516	0	0	0	0
AB124611	0.0379944	0.0700908	18.8193	32.2037
AB251060	0	0	0	0
AB251100	0	0	0	0
AB251138	0	0	0	0
AB251164	0	0	0	0
AB251181	0	0	0	0
AB251235	0	0	0	0
AB251236	0	0	0	0
AB335823	0	0	1.33563	0
AB336517	0	0	0	0
AB336562	0	0	0	0
AB336647	0	0	0	0
AB336678	0	0	0	0
AB336697	0	0	0	0
AB336723	0	0	3.43448	2.47979
AB336785	0	0	0	0
AB336794	0	0	2.00345	0
AB336801	0	0	0	0
AB336819	0	0	0	0
AB336885	0	0	0	0
AB336927	0	0	3.43448	0
AB337358	0	0	0	0
AB337665	0	0	0	0
AB337734	0	0	0	0
AB338584	0	0	0	0
AB338586	0	0	0	0
AB338600	0	0	0	0
AB339176	0	0	0	0
AB339387	0	0	0	0
AB339827	0	0	0	0
AB339850	0	0	0	0
AB339928	0	0	0	0
AB339929	0	0	0	0
AB339931	0	0	0	0
AB340012	0	0	0	0
AB340047	0	0	0	0
AB340065	0	0	0	0
AB340534	0	0	0	0
AB340928	0	0	0	0
AB340940	0	0	0	0
AB340976	0	0	0	0
AB340990	0	0	0	0
AB341001	0	0	0	0
AB341018	0	0	0	0
AB341028	0	0	0	0
AB341074	0	0	0	0
AB341098	0	0	0	0
AB341100	0	0	0	0
AB341111	0	0	0	0
AB341135	0	0	0	0
AB341138	0	0	0	0
AB341166	0	0	0	0
AB341180	0	0	0	0
AB341191	0	0	0	0
AB341556	6.58876	6.69025	11.427	10.0048
AB341580	0	0	0	0
AB341590	0	0	0	0
AB341597	0	0	0	0
AB341654	18.4753	19.6078	10.2613	5.13127
AB341946	0	0	0	0
AB341979	0	0	0	0
AB341994	0	0	0	0
AB341998	0	0	0	0
AB342013	0	0	0	0
AB342034	0	0	0	0
AB342727	0	0	0	0
AB342860	0	0	0	0
AB342872	0	0	0	0
AB342896	0	0	0	0
AB342953	0	0	0	0
AB343394	1.03792	0.505541	3.42093	15.7293
AB345949	0	0	0	0
AB345950	0	0	0	0
AB346227	5.73959	7.34264	3.55982	1.73862
AB347565	0	0	0	0
AB349192	0	0	0	0
AB349505	0	0	0	0
AB349556	0	0	0	0
AB349586	0	0	0	0
AB349695	38.0835	44.9674	40.1142	18.8521
AB349790	0	0	0	0
AB349855	0	0	0	0
AB349959	8.9245	53.1225	120.207	14.0956
AB350188	0	0	0	0
AB350257	0	0	0	0
AB350538	13.8487	35.6037	78.993	13.3908
AB350566	18.3124	19.4278	27.0608	10.4128
AB350908	0	0	0	0
AB350970	0	0	0	0
AB351078	0	0	0	0
AB351165	0	0	0	0
AB351921	0	0	0	0
AB352058	0	0	0	0
AB352175	0.137918	0.254392	0.639844	0.433332
AB352403	0	0	0	0
AB352479	22.9654	46.1935	65.7131	10.5026
AB352701	0	0	0	0
AB352881	0	0	0	0
AB352963	13.4814	15.6027	11.2193	0.892723
AB352980	0	0	0	0
ABCR	0	0.0224753	0.243189	0.215225
ABLIM2	0	0	0.408681	3.39237e-05
ACRP	1.90402	2.22494	0.476	0.253604
ADAM22	0.287058	0.375919	0.85569	0.120409
ADD1	18.3055	25.3306	14.8249	10.8935
AF032968	0.787351	1.0893	0.123134	0.207692
AF067063	0.0559323	0.0343717	0.105873	0
AF217545	0.257976	0.264968	1.13446	0.812323
AF251705	0	0	5.37367	7.31232
AF332090	0	0	0	0
AF357355	0	0	0	0
AF357359	0	0	0	0
AF357374	92.2072	128.967	26.2579	2.8424
AF357376	69.0829	132.376	3.43448	5.50309
AF357425	0.175273	0.207512	0.643278	0.391617
AF365933	0	0	0.034681	0
AF366264	0.0926143	0.0489849	0.161699	0.0376554
AF401983	0	0	0	0
AF479018	0	0	25.4745	25.6101
AF529169	0	0	0.0356588	0.00829438
AI118078	16.4758	15.9796	1.02979	0.837493
AI182371	0.382046	0.832528	0.690895	2.75431
AI314180	42.9395	43.3385	18.3746	39.7034
AI314831	0.0508923	0.0234977	0.0550803	0.0219298
AI314976	28.7674	30.2133	12.0386	6.74341
AI316807	44.4956	42.6472	19.5209	15.3348
AI317395	0.0908155	0.278521	2.31772	1.19203
AI324046	0	0	0.573301	1.00841
AI413582	43.5621	45.6105	77.7711	101.09
AI414108	0.00839032	0.0258594	0.296442	0.209987
AI427809	0.0213748	0.0401542	4.66358	3.22052
AI428936	21.3327	23.4346	20.6685	26.1917
AI429214	4.95352	5.2367	1.65781	0.627654
AI462493	37.7868	37.7385	22.0113	24.429
AI464131	1.44002	1.36994	28.1708	27.899
AI467606	17.0377	16.7194	45.0452	94.3738
AI480653	20.9598	20.307	16.0401	23.9657
AI481877	0.0182127	0	0.0225399	0
AI504432	0	0	0.733953	0.395687
AI506816	23.5501	30.5638	0.0112964	0.0315953
AI507597	0	0	0	0.250652
AI593442	0.0791892	0.0487495	0.0265786	0.00617874
AI597468	14.6724	16.6552	3.21759	11.7962
AI597479	34.0772	35.8989	6.0485	2.65796
AI606181	8.84426	11.4622	6.54994	4.63812
AI607873	3.30697	3.39243	115.284	40.7737
AI646023	1.31552	1.55084	5.30591	7.43688
AI661453	19.9655	19.6708	1.42936	2.52703
AI662270	0.0961833	0.177474	7.39286	5.80325
AI747448	0	0	0	0
AI747699	0	0	0.0372275	0
AI836003	0	0	0.224662	0.424135
AI837181	60.9377	54.9356	63.2913	84.94
AI846148	20.3022	20.0524	14.3625	24.616
AI848100	22.1651	24.251	2.94252	2.52145
AI854703	0.163785	0.156726	2.1778	2.38969
AI894139	4.56429	4.59119	6.71266	4.16291
AI987944	8.31113	9.8345	4.3755	2.61896
AIGP-2	2.85451	4.0987	1.95669	1.0364
AJ308964	0	0	0.0343637	0
AJ311366	0	0	0.27833	0.382055
AK002250	0.335648	1.47539	0.383737	0.521258
AK002390	12.7808	15.5904	5.09813	3.0983
AK002417	1.05554	1.2827	0.219344	0.145449
AK002663	0	0	0.609491	1.41769
AK002708	0.218246	0.44757	3.5372	4.65862
AK002723	7.32752	8.84427	52.9011	30.5308
AK002733	0	0	0	0
AK002748	0	0.0262888	0.348336	0.263861
AK002805	0.0338008	0.228119	0.546864	0.530859
AK002838	0	0	0.732369	0.454043
AK002860	0	0	1.83846	3.16574
AK002866	0.654551	0.763908	0.539575	0.469757
AK002929	0.543202	0.388822	1.16358	0.24852
AK003103	0.863007	0.767814	14.3092	11.6682
AK003136	0	0	0.130898	0
AK003327	0	0	2.06318	0
AK003663	0	0	0	0
AK003793	0.38925	0.215376	1.35286	0.582102
AK003812	1.43904	1.63222	2.18684	0.773085
AK003943	0.0604131	0.148477	0.0764152	0.0539851
AK004186	12.0548	10.959	5.78143	0.855395
AK004221	5.77142	8.20115	1.8746	2.63266
AK004226	0	0	7.63634	109.223
AK004252	1.10896	0.742708	9.57252	6.24105
AK004434	0.180486	0.170696	0.428244	1.22493
AK004585	0.146031	0.292295	3.3305	46.5803
AK004850	0.256557	0.235042	3.0293	1.20218
AK005115	0.141359	0.23901	0.615554	0.801668
AK005214	0	0	0.113816	0
AK005305	8.52569	8.59125	4.53215	1.81629
AK005306	1.99479	1.38849	1.81065	1.47399
AK005363	0	0	0.514466	0.674609
AK005410	1.80216	2.193	5.13709	3.8281
AK005414	1.01199	1.56852	19.453	11.7468
AK005418	2.69347	3.03672	5.72946	3.61512
AK005477	0.533511	0.129054	0.763747	0.0997955
AK005481	0	0	0.207461	0
AK005503	7.60745	7.0542	15.7749	0
AK005538	2.40009	2.43283	1.90337	0.169719
AK005539	0	0	0	0
AK005576	0	0	0	0
AK005578	0	0	0	0.0880703
AK005580	0	0	0.266956	0.0953443
AK005589	0	0	0	0
AK005591	0.0920208	0.282275	0.828544	0.1686
AK005608	0	0	0	0.28986
AK005616	0	0	0.475408	1.49215
AK005629	0	0	0	0
AK005634	0	0	0.222255	0.310556
AK005635	0	0	0.0961213	0.204495
AK005641	0	0	0.153018	0.219414
AK005643	0	0	0	0
AK005649	0	0	0	0
AK005651	0	0	0.0669248	0
AK005653	14.1125	10.5673	33.2145	12.0289
AK005657	0	0	0	0
AK005667	0	0	0.806352	0.909972
AK005677	0	0.0549198	0	0
AK005678	0.204375	0.869557	0.994286	0.159178
AK005686	2.38425	3.70478	0.502122	0.660191
AK005707	0.0269123	0.0331112	0	0
AK005712	0	0	0.146824	0
AK005722	2.51397	2.62299	1.55923	1.30121
AK005744	1.65927	2.15219	1.20551	0.5496
AK005754	0.297057	0.0923579	0.401003	0.143538
AK005780	0	0	0.0383294	0
AK005792	0	0	0	0
AK005793	0.996516	0.853789	0.533488	4.59509
AK005807	0	0	0	0
AK005828	2.2632	1.96258	20.9086	8.11906
AK005833	0	0	0	0
AK005834	0	0	0	0
AK005838	0	0	0	0
AK005839	1.20422	0.369574	6.6147	8.97607
AK005849	0	0	0.0376461	0
AK005856	0	0	0	0.0771152
AK005895	0.124877	0.076572	0.163976	0
AK005897	2.76032	2.67935	1.58303	2.79112
AK005905	0	0	0.713559	0.796668
AK005912	0	0	0	0
AK005951	2.29449	1.6116	2.47873	2.98866
AK005956	0.164386	0.1009	0.0525805	0.149412
AK005958	0	0	0	0
AK005967	1.21161	1.85822	29.6412	45.8644
AK005987	0	0	1.53415	0
AK006001	0.0546878	0.134567	0.574634	0.249918
AK006015	0	0	0.0609832	0
AK006022	0.140496	0.346993	0.305529	0.00485336
AK006024	0	0	0	0
AK006029	0.0602275	0.074011	0.11426	0
AK006031	0.192139	0.825094	0	0
AK006037	0	0.860613	0	0.924391
AK006039	0	0	0	0
AK006045	0	0	0.0340901	0.0480911
AK006051	0.964661	1.88573	0.0927885	0.220967
AK006052	0	0	0	0
AK006070	0	0	0	0
AK006071	0	0	0	0
AK006087	0	0	0.132657	0.194355
AK006108	0	0	0	0
AK006114	0.174229	0.213864	1.00585	0.238487
AK006119	0	0	0	0
AK006121	0	0	0	0
AK006131	0	0	0	0
AK006138	0.124099	0.0760895	0.732895	1.1536
AK006139	0	0	0	0
AK006160	0	0	0.139984	0
AK006167	0	0	1.10378	0.607763
AK006173	0.0855236	0.426512	0.417765	1.40346
AK006186	0	0	0	0
AK006189	0	0	1.37267	1.11105
AK006202	0	0	0	0
AK006231	0	0	0	0
AK006239	0.190176	0.467212	0.659645	0.193233
AK006240	0	0	0	0
AK006245	2.26047	2.08085	32.2825	77.6065
AK006250	2.61877	2.6647	1.33502	0.676144
AK006264	0	0	0	0
AK006272	0	0	0	0
AK006282	0	0	0	0.944666
AK006293	0	0	0	0
AK006304	0	0	0	0
AK006308	0	0	0	0
AK006310	0.0986393	0.0606307	0	0
AK006321	0	0	0.152532	0.218698
AK006331	0	0	0	0
AK006334	0	0	0.0284436	0
AK006343	0	0	0	0
AK006348	0	0	0	0.160902
AK006355	0	0	0	0
AK006359	0	0	0.0663705	0
AK006362	0	0	0	0
AK006380	0	0	0	0
AK006389	0	0	0	0
AK006397	0	0	0.930522	0.327165
AK006409	0	0	0	0
AK006412	0	0	0	0
AK006413	0	0	0	0
AK006426	0.306901	0.141325	0	0
AK006434	0.392646	0.137879	0	0
AK006451	0.405022	0.54695	0.725027	0.588456
AK006454	0.104279	0.160227	1.47749	4.80966
AK006455	0	0	1.13457	0.228387
AK006457	0	0	0	0
AK006461	0	0	0.197702	0
AK006470	0.118222	0.362504	0.926957	0.443186
AK006474	0	0	0	0
AK006485	0.547631	0.783339	2.47602	1.54097
AK006486	0	0	0	0
AK006507	0	0.408665	0	0
AK006512	0	0	0.066739	0
AK006531	0.345008	0.466711	0.0438584	0.496151
AK006540	0	0	0	0
AK006560	0	0	0.0963139	0
AK006561	0	0	0.126662	0
AK006563	0.835582	1.45202	1.47816	0.6664
AK006568	0	0	0	0
AK006570	0	0	0	0.176141
AK006572	0.119995	0	0	0.225321
AK006576	0.555505	0.426863	0.726563	0.531956
AK006581	0	0	0	0
AK006587	0	0	0	0
AK006593	0	0	0	0
AK006607	0.605746	0.618759	0.485452	0.92253
AK006610	0.779201	0.142023	0	0
AK006623	0	0	0	0
AK006633	0	0	0	0
AK006637	0.416098	0.32813	1.14294	1.93469
AK006644	0	0.0691912	0	0
AK006651	0	0	0.397515	0.258471
AK006653	0	0	0	0
AK006659	0	0	0	0
AK006664	0	0.229251	2.05144	2.72446
AK006677	0	0	0	0
AK006690	0	0	0	0
AK006701	0	0	0	0
AK006702	0.0901175	0.110583	0.289495	0.0967394
AK006706	0	0	0	0
AK006709	9.06875	14.2391	21.6019	13.9741
AK006712	0	0	0.0751158	0
AK006725	0	0	0.0282763	0
AK006730	3.36723	7.39105	7.94045	2.89284
AK006738	0	0	0	0
AK006748	0	0	4.72746	2.89322
AK006752	0.0543557	0.110083	0.179784	0.185504
AK006766	0	0	0	0
AK006768	0	0	0	0
AK006812	0	0	0	0
AK006824	0	0	0	0
AK006844	0	0	0	0
AK006852	0	0	0	0
AK006859	0	0	0	0
AK006870	0	0	0	0
AK006884	0	0	0	0.324927
AK006889	0	0	0	0
AK006894	0	0	0	0
AK006895	0	0	0	0
AK006896	0	0	0	0
AK006899	0.410943	0	0	0
AK006909	0	0	0	0
AK006921	0	0	0	0
AK006930	0	0	0.607692	1.12116
AK006933	0.108801	0.466944	0.353311	0.30331
AK006934	0	0	0	0
AK006937	0.325499	0.399135	0	0
AK006942	0	0	0	0
AK006943	0	0	0	0
AK006947	0	0	0	0
AK006958	0	0	0	0
AK006961	0	0	0	0
AK006968	0	0	0	0
AK006971	0	0	0	0
AK006973	0.242891	0.521337	0.159093	0.228396
AK006980	2.57857	3.36205	3.34306	2.43148
AK006991	0	0	0	0
AK006996	0	0	0	0
AK006997	0	0	0	0
AK007006	0	0	0	0
AK007011	0.045752	0.0876257	0.155474	0.10415
AK007025	0	0	0	0
AK007038	0	0	0	0
AK007041	0	0	0	0
AK007042	0	0	0	0
AK007067	0	0	0.123657	0.129414
AK007073	0	0	0	0
AK007082	0	0	0.0748845	0.125844
AK007083	0	0	0	0
AK007084	0	0	0.045171	0.447967
AK007095	0	0	0	0
AK007100	0	0.151634	0.365515	0
AK007102	0	0	0	0
AK007110	0	0	0	0
AK007112	0.274177	0.210492	2.35089	0.678026
AK007116	0	0	0	0
AK007118	0.08627	0.0265197	1.73032	0.570556
AK007137	0.135497	0.166142	0.454069	0
AK007151	0	0	0	0
AK007154	2.33958	2.55713	1.73813	0.343897
AK007159	0.0461022	0	0.388823	0.292173
AK007162	0	0	0.243818	0.276934
AK007174	1.20332	1.72132	0.441564	0.254406
AK007185	0	0	0	0
AK007191	0.168115	0.466318	0.75547	0.401645
AK007204	0	0	0.163272	0
AK007205	0	0	0	0
AK007210	0.571779	1.40308	13.6789	3.33387
AK007214	0	0	0	0.0194848
AK007216	0	0.281212	0.814086	0.199828
AK007223	3.44143	4.39238	4.28537	2.77886
AK007237	0.993615	1.21913	2.80556	1.30497
AK007238	0	0	0.223402	0.162331
AK007249	0.0204655	0	0.025357	0
AK007255	2.80284	2.27376	1.09227	0.370809
AK007260	0	0.125491	0.0661878	0
AK007274	0	0	0.30163	0.356809
AK007280	0.393144	0.32652	4.75246	0.99494
AK007290	0.352612	0.324605	0	0
AK007305	0	0	0	0
AK007349	0	0	0.275735	0.409056
AK007376	0.852315	0.856302	0.346111	0.982313
AK007436	0.948916	1.20888	2.34657	4.3029
AK007459	24.4721	27.8638	224.572	654.077
AK007460	0.329109	0.403583	1.06936	0.204055
AK007531	0.0621408	0.0955533	0.11612	0
AK007545	1.5462	2.51092	10.9884	9.55375
AK007571	3.26019	2.7193	10.5428	9.73618
AK007605	1.32455	1.63062	0.582765	1.1597
AK007719	0	0	20.2913	8.96805
AK007770	8.98497	9.50097	12.9545	9.99947
AK007818	0	0	0	0
AK007819	0.270993	0.332283	13.2592	38.0989
AK007836	5.18601	5.8161	0.41561	0.358454
AK007845	0	0	0	0
AK007854	0	0	0	0
AK007898	1.07906	2.46921	3.3157	3.19405
AK007899	0.136426	0.250914	0.0903031	0.13017
AK007907	0.854003	1.90595	3.11595	5.84726
AK007947	0	0	0	0
AK007998	10.3323	12.1095	6.7592	3.61978
AK008044	1.14299	1.26204	10.8015	47.8216
AK008077	4.95655	6.0247	27.1184	26.3425
AK008166	0.410166	0.440362	1.32741	0.189609
AK008222	0	0	0.133014	0.0627949
AK008288	0.346323	0.637072	1.87689	0.860733
AK008306	3.26035	3.11628	4.72352	1.92124
AK008334	0	0	0.22072	0.460283
AK008384	0.791584	0.607007	0	0
AK008417	19.5096	20.5439	16.5269	14.1622
AK008432	0	0	0	0
AK008482	0.186565	0.71386	0.826129	0.562628
AK008488	0.386347	0	0	2.25268
AK008491	10.1494	10.0352	0.45121	0.254219
AK008496	0	0	0.0571929	0.483436
AK008545	0	0	0	0
AK008560	0.179033	0.366683	0.264096	0
AK008572	0.355137	0.523431	0	0.127991
AK008665	75.4582	101.773	0	0
AK008705	10.4655	8.8168	1.3096	0.729317
AK008755	0	0	0	0
AK008767	0	0	0	0.110068
AK008826	0	0	0	0
AK008833	2.06498	2.07984	0.587154	0.743796
AK008852	2.1915	2.67955	5.11184	5.94092
AK008857	0.34822	0	0.126751	0
AK008866	44.5835	46.6595	8.47042	4.25913
AK008921	0	0	0	0
AK008969	1.74951	1.28547	2.95676	3.31669
AK009064	4.73686	3.26616	30.9488	9.5037
AK009067	29.8748	38.0961	0	0
AK009121	3.0597	3.36589	0.786728	1.96661
AK009188	0.517951	0.382009	0.0652208	0.0459776
AK009335	0.512191	0.455096	2.30107	0.918121
AK009351	0	0	32.4988	0.320007
AK009383	0	0	5.26071	0
AK009395	12.7157	15.4643	3.32035	1.70651
AK009597	0.148851	0.445202	2.13686	6.59556
AK009639	0.139547	0.0841349	1.8417	1.51853
AK009699	0.164893	0.207979	0.475219	0.625161
AK009724	0	0	15.979	1.01424
AK009784	0	0	0	0
AK009785	0.14481	0.35695	1.02073	0.724982
AK009813	0.373526	1.14632	1.42005	0.440829
AK009869	0	0.0708073	3.84084	0.647631
AK009977	0.379621	0.400046	0.592892	0.434555
AK010044	0	0	10.8159	0
AK010122	0.0939199	0.216689	0.742993	0.163192
AK010129	0	0	1.02347	0.589086
AK010245	0	0	0.043378	0
AK010368	0	0.0563234	0.413255	0.252265
AK010390	0	0	0.162391	0.137367
AK010403	97.4998	98.8576	20.7053	53.6356
AK010638	0	0.0307067	0.0871391	0
AK010767	0.652166	1.20839	0.727275	0.430092
AK010770	0.490712	0.749952	0.237235	0.324279
AK010774	0	0	0	0
AK010793	2.58124	2.97616	8.94238	33.2343
AK010804	0	0	0	0
AK010824	1.41184	1.49122	2.95822	1.21385
AK010870	1.27593	1.71778	2.34604	0.766591
AK010878	34.3379	34.9683	5.41575	5.97896
AK010894	1.47095	1.53139	1.02107	0.424351
AK010897	0	0	0	0
AK011205	111.8	130.332	7.61701	3.8417
AK011326	0.367478	0.71799	0.456806	1.16921
AK011408	0	0	12.4618	9.11193
AK011444	3.92497	5.30711	0.905324	0.772017
AK011460	49.1445	57.5891	25.5783	9.1593
AK011479	1.9756	2.24823	0.35352	0.185221
AK011482	2.1578	2.45817	0.575423	0.443376
AK011498	16.2346	17.0837	3.48541	2.78079
AK011568	0	0.064355	1.83982	2.85459
AK011684	0.854158	1.22544	0	0.0357999
AK011877	0	0	0.062104	0.218771
AK011885	11.6894	13.6346	13.3203	7.46939
AK011897	0.128208	0.126012	0.349912	0.312373
AK011913	0	0	0.030972	0
AK012007	1.29533	0.968351	1.28921	0.548141
AK012035	0	0	0.134266	0
AK012142	3.45624	3.91862	1.3329	1.28707
AK012157	0	0.246115	5.09621	4.10596
AK012214	0.762083	1.91114	2.19038	1.31559
AK012238	0.15714	0.0482376	0.953167	0.56968
AK012325	4.06728	5.0893	3.47101	5.28136
AK012387	57.5744	53.6882	1.15367	0.912068
AK012506	2.27078	1.57147	0.937861	1.31887
AK012547	0.146904	0.450717	0.392145	0.141715
AK012595	0.0984624	0.0603975	0.254252	0.0906948
AK012713	0	0	0	0
AK012841	1.38853	1.81956	0.545015	0.42172
AK012972	1.38012	2.20606	0.125317	0
AK013046	21.8395	23.3879	0.332437	0.269369
AK013187	0.866837	0.922472	1.73161	2.56921
AK013290	0	0.389064	0	0
AK013293	0	0	0.100982	0.142432
AK013372	15.8851	15.9481	3.2042	1.22984
AK013453	0	0	0.330335	0.467298
AK013480	0	0.04026	0.181731	1.12662
AK013506	0.380351	1.05123	0.395787	0.193233
AK013593	15.1658	12.223	7.89619	20.3933
AK013627	0.163112	0.324778	2.68922	1.79997
AK013668	1.00685	2.01291	8.63262	13.164
AK013680	0.287344	0	0.211818	0
AK013712	0	0	0.0296357	0.166944
AK013794	9.01392	11.6103	18.2446	8.73112
AK013876	0	0	0.751036	0.504844
AK013883	10.34	14.4916	3.65614	1.00912
AK014028	0.0667817	0.078345	0.0761036	0.056165
[truncated: 27,957 more rows]
