# Supplementary material for: Multi-Omics Characterization of the 4T1 Murine Mammary Gland Tumor Model
Source: Front Oncol. 2020 Jul 23;10:1195. doi: 10.3389/fonc.2020.01195 (PMC7390911; doi:10.3389/fonc.2020.01195)
Supplement: Table S6 — Differential gene expression in 4T1 vs. BALB/c mammary gland, showing log fold change, FDR, and baseline expression values. [file Table_6.XLSX]

## Sheet: Tabelle1
Table S6: Differential gene expression in 4T1 vs. BALB/c mammary gland, showing log fold change, FDR and baseline expression values.
genes	logFC	logCPM	PValue	FDR	mean_cpms_treatment (4T1)	mean_cpms_reference (Balbc mammary gland)
Cfd	-20.362	12.8847	5.57633e-91	1.67039e-86	0.00723636	15125.6
BC114417	-20.0455	10.2371	2.34091e-80	1.40244e-76	0	2413.71
Cidec	-19.0638	9.25541	1.73455e-80	1.40244e-76	0	1222.25
Adipoq	-18.6012	8.79289	7.2452e-69	1.20572e-65	0	886.969
Myh4	-18.5233	8.71508	3.48971e-09	2.65855e-08	0	840.367
Fabp4	-17.8901	8.08187	1.07493e-61	5.85445e-59	0	541.802
Cxcl12	-17.6224	7.81417	2.25352e-70	4.82173e-67	0	450.046
Ly6d	-17.3992	7.59107	1.659e-70	3.91011e-67	0	385.554
Gas6	-17.3949	7.5868	1.68894e-68	2.66274e-65	0	384.417
Ces1d	-17.18	7.37192	6.22493e-61	3.16047e-58	0	331.192
Acta1	-17.0786	11.4495	2.28034e-10	2.03115e-09	0.03904	5593.09
Retn	-16.9898	7.18177	9.45695e-66	9.76838e-63	0	290.286
Cd36	-16.9876	7.17959	8.39947e-50	1.52489e-47	0	289.839
Col3a1	-16.9139	9.47001	1.96277e-80	1.40244e-76	0.0122504	1418.27
Ckm	-16.871	10.5436	8.47509e-09	6.11149e-08	0.0253658	2985
C1qc	-16.732	6.92401	5.04238e-65	4.08228e-62	0	242.791
LOC100048884	-16.6931	6.88513	2.14251e-68	3.20895e-65	0	236.325
Myl1	-16.6903	6.88257	3.28419e-12	3.71658e-11	0	235.872
Pvalb	-16.633	6.82527	7.43487e-08	4.70153e-07	0	226.683
Plin1	-16.6292	9.19034	9.37823e-64	6.68869e-61	0.0122504	1168.34
Beta-s	-16.6257	6.81774	1.0674e-63	7.2668e-61	0	225.545
Mrap	-16.5712	6.76332	8.79372e-67	1.03659e-63	0	217.187
Mup10	-16.5162	6.70833	1.42895e-52	3.14983e-50	0	209.047
G0s2	-16.4883	6.68037	2.16585e-65	1.966e-62	0	205.05
Adamts2	-16.4742	6.6663	3.06608e-54	7.78343e-52	0	203.068
Lep	-16.438	6.63015	1.60451e-60	8.01051e-58	0	198.021
Lum	-16.4134	6.60555	1.32367e-49	2.36015e-47	0	194.665
Dpt	-16.3891	6.58122	1.64319e-56	5.59337e-54	0	191.412
C1qb	-16.3646	6.55677	1.8818e-65	1.76154e-62	0	188.203
Glycam1	-16.3645	6.55669	4.59286e-63	2.99085e-60	0	188.189
Sfrp2	-16.2564	6.44859	6.56383e-54	1.6385e-51	0	174.615
Rbp4	-16.2371	6.42935	1.01055e-64	7.96605e-62	0	172.286
Adrb3	-16.1941	9.03888	1.85524e-71	6.17484e-68	0.0155328	1051.88
Efemp1	-16.1261	6.31838	9.76841e-62	5.41875e-59	0	159.522
Wbscr14	-16.117	6.30997	3.91499e-62	2.25526e-59	1.1573e-06	158.604
Fxyd1	-16.1036	6.2959	9.02111e-58	3.50945e-55	0	157.05
AK215842	-16.0224	6.21472	2.29387e-61	1.22702e-58	0	148.465
Slco2b1	-16.0196	6.21197	4.25964e-63	2.8355e-60	0	148.178
Gm10167	-16.0185	6.21334	5.17547e-63	3.29854e-60	5.17661e-06	148.318
Ccl19	-15.9867	6.17902	8.54887e-50	1.54266e-47	0	144.844
C1qa	-15.8954	6.08777	1.96057e-57	7.43402e-55	0	135.957
Paqr9	-15.8768	6.06912	4.92468e-49	8.57668e-47	0	134.216
Pparg	-15.8516	6.04399	2.57308e-55	7.55652e-53	0	131.874
Eef1a2	-15.8451	6.03789	3.31326e-08	2.20455e-07	0	131.29
M34473	-15.8296	6.02199	3.12271e-61	1.64106e-58	0	129.883
abParts	-15.7382	9.13263	1.67118e-78	8.34336e-75	0.0194868	1122.5
Serping1	-15.7317	8.25586	3.53245e-70	7.05431e-67	0.00723636	611.259
Klf15	-15.7035	5.89605	3.53736e-56	1.14593e-53	0	119.029
Gpr81	-15.6468	5.83934	1.1609e-59	5.51982e-57	0	114.429
Laptm5	-15.5821	8.13958	1.13662e-67	1.48033e-64	0.0122504	563.927
AK171116	-15.5291	5.72165	4.5259e-46	6.51795e-44	0	105.475
Gm1987	-15.5099	5.7025	4.50928e-51	9.12671e-49	0	104.08
Lama2	-15.503	5.69564	1.67918e-54	4.33619e-52	0	103.566
Cd79b	-15.4852	5.67781	2.25103e-57	8.32462e-55	0	102.306
Hba-a2	-15.4722	8.03601	1.43007e-52	3.14983e-50	0.0122504	524.862
Cd209f	-15.4596	5.65228	5.81093e-57	2.09719e-54	0	100.501
Mup19	-15.4337	5.62645	5.51622e-43	6.60954e-41	0	98.7047
Cyp4b1	-15.4328	5.62547	3.03967e-55	8.75514e-53	0	98.6469
Cxcl14	-15.409	5.60168	2.76384e-49	4.87005e-47	0	97.05
Spon2	-15.4041	5.59679	3.80943e-58	1.6072e-55	0	96.711
Kit	-15.345	5.53778	8.13179e-57	2.89985e-54	0	92.8276
Gpihbp1	-15.3429	5.53569	4.29512e-55	1.20243e-52	0	92.6911
Cxx1b	-15.3348	5.52759	1.06643e-56	3.71453e-54	0	92.1743
Fcgbp	-15.3276	5.52037	6.19685e-56	1.93361e-53	0	91.7209
Gdf10	-15.2776	5.47035	8.71312e-48	1.39573e-45	0	88.5997
Tyrobp	-15.2409	5.43377	5.5592e-55	1.54191e-52	0	86.3652
Ppp1r1a	-15.2207	5.41354	1.19804e-45	1.66145e-43	0	85.1777
Lyz2	-15.2161	7.77426	7.86442e-64	5.74582e-61	0.0122504	437.74
Lilrb3	-15.1685	5.3614	1.38239e-52	3.09027e-50	0	82.1326
Thrsp	-15.0931	9.03748	1.39687e-75	5.97759e-72	0.0317372	1050.84
Pgr	-15.0823	5.27517	1.12925e-38	9.86201e-37	0	77.3855
H2-Ob	-15.0672	5.26023	4.96135e-53	1.16107e-50	0	76.5706
Tpsb2	-15.0576	5.25068	9.86864e-53	2.2566e-50	0	76.0647
Cyp2d22	-15.0491	5.24218	1.50056e-52	3.28096e-50	0	75.617
Hfe2	-15.0365	5.23015	3.32751e-10	2.8925e-09	0	74.9535
Krt5	-15.0337	5.22679	1.25249e-47	1.98509e-45	0	74.8056
Ckmt2	-15.0257	5.2194	1.46539e-07	8.86784e-07	0	74.3958
Tox2	-15.0166	5.20947	4.50309e-32	2.71956e-30	0	73.9421
Cldn5	-15.015	5.208	3.41545e-42	3.9655e-40	0	73.8591
V00821	-14.9852	5.17834	7.42879e-51	1.49349e-48	0	72.3373
Myot	-14.9829	5.17667	3.65565e-06	1.77883e-05	0	72.2211
Pou2af1	-14.975	5.16797	2.0717e-37	1.69095e-35	0	71.8396
Ntrk3	-14.9328	5.12604	1.21422e-44	1.60228e-42	0	69.7521
Itm2a	-14.832	5.02531	1.57182e-42	1.83921e-40	0	65.0414
Dock2	-14.8061	4.99943	5.42653e-48	8.98076e-46	0	63.8978
Fndc1	-14.8003	4.9936	2.92416e-48	4.86628e-46	0	63.635
Mfap4	-14.7976	4.99106	2.13838e-36	1.65946e-34	0	63.5084
Eln	-14.7968	7.32416	7.14968e-68	1.01923e-64	0.00725105	320.403
Ccl22	-14.7774	4.97075	2.25751e-47	3.54051e-45	0	62.6381
Fam190b	14.7476	4.94062	1.54032e-46	2.27292e-44	61.3507	0
Slc36a2	-14.7437	8.17177	2.55304e-69	4.49861e-66	0.0245362	576.63
Gnai1	-14.7144	4.90776	1.2516e-42	1.48189e-40	0	59.9654
Cd6	-14.6962	4.88959	1.09166e-39	1.05827e-37	0	59.2167
Irs3	-14.6535	4.84695	4.98094e-42	5.73862e-40	0	57.4868
Tlr9	-14.6337	4.82719	2.56346e-39	2.41473e-37	0	56.7068
Cd209b	-14.6321	4.82586	8.10432e-35	5.75563e-33	0	56.627
Rian	-14.6212	4.81494	4.45658e-33	2.88954e-31	0	56.1977
Gypc	-14.6163	4.80989	3.57839e-44	4.5613e-42	0	56.0145
Syn2	-14.5967	4.79028	5.21188e-41	5.57578e-39	0	55.2698
Sox17	-14.5924	4.78577	1.50935e-30	8.14639e-29	0	55.108
Lyz1	-14.5904	4.78406	1.84838e-39	1.75772e-37	0	55.0124
Rarres2	-14.5453	4.739	1.52673e-42	1.79719e-40	0	53.3231
Car3	-14.5425	11.729	1.98648e-75	7.43811e-72	0.271093	6788.61
Emr1	-14.4979	4.69182	4.60306e-35	3.33055e-33	0	51.5955
2900062L11Rik	-14.4893	4.68288	7.91166e-33	5.02105e-31	0	51.3076
Plin4	-14.4653	10.0486	8.00883e-82	1.19952e-77	0.09242	2118
Ctsf	-14.4552	4.64896	9.70643e-42	1.09719e-39	0	50.1014
Thy1	-14.4551	6.98039	4.01364e-66	4.29387e-63	0.00723636	252.461
Slc7a10	-14.4489	7.00524	2.25976e-65	1.99092e-62	0.0122531	256.835
Fxyd6	-14.4312	4.62513	6.06451e-40	5.95614e-38	0	49.2682
Ppp1r3c	-14.4263	4.6204	3.96158e-31	2.21811e-29	0	49.096
Scn7a	-14.41	4.60406	1.44437e-33	9.65761e-32	0	48.5446
Igfbp5	-14.4091	8.32409	1.00254e-70	3.00311e-67	0.0267232	640.847
Il10ra	-14.4064	4.60025	1.1369e-41	1.2755e-39	0	48.43
2610019F03Rik	-14.4036	4.59749	1.00496e-40	1.05257e-38	0	48.3343
Gm11711	-14.3907	4.58463	3.40238e-40	3.40864e-38	0	47.9038
Myh2	-14.3543	4.54928	4.79461e-08	3.12427e-07	0	46.7114
Fxyd2	-14.3373	4.53129	2.81067e-39	2.63105e-37	0	46.1726
Plxna2	-14.336	4.53012	5.47582e-38	4.60754e-36	0	46.1216
Serpina3n	-14.3113	6.83431	2.9131e-55	8.47203e-53	0.00723636	228.125
Dmbt1	-14.3102	7.706	3.18414e-61	1.6445e-58	0.0194868	417.495
Dmrt2	-14.3008	4.49474	3.34113e-34	2.30607e-32	0	45.0227
Cdh5	-14.2938	6.8194	1.57636e-66	1.74888e-63	0.00723636	225.791
Clec10a	-14.2904	4.48458	1.15883e-36	9.15901e-35	0	44.6851
Snx20	-14.2828	4.47641	3.27485e-22	9.85911e-21	0	44.466
AK147796	-14.2808	4.47488	6.69248e-39	6.00658e-37	0	44.3972
Ly6c2	-14.2663	4.46039	5.31686e-39	4.81168e-37	0	43.9517
Tcrb	-14.2588	4.45292	1.3528e-38	1.17458e-36	0	43.7256
Pamr1	-14.2496	4.44379	2.62968e-37	2.13475e-35	0	43.4386
Adcyap1r1	-14.2378	4.43194	4.24861e-39	3.89196e-37	0	43.0891
Alb	-14.2101	4.40376	4.81214e-22	1.43288e-20	0	42.2796
Trim29	-14.2089	4.40321	8.38771e-38	7.01826e-36	0	42.2334
Card11	-14.1979	4.39182	1.71986e-29	8.54369e-28	0	41.9227
Mup2	-14.1918	4.38549	1.36667e-21	3.93262e-20	0	41.7472
Hcls1	-14.1868	4.38093	5.83229e-36	4.38961e-34	0	41.5982
Cd52	-14.1831	4.37736	4.54423e-38	3.83443e-36	0	41.4896
Mybph	-14.1827	4.37803	2.87814e-09	2.21631e-08	0	41.4708
Adcy4	-14.164	4.35833	1.02125e-37	8.47414e-36	0	40.9391
Serpina3c	-14.1572	4.35168	1.94835e-33	1.28553e-31	0	40.7419
Plin	-14.1485	4.34291	8.03045e-37	6.41472e-35	0	40.5007
Nfam1	-14.141	4.33533	1.1718e-37	9.6432e-36	0	40.2915
Mybpc1	-14.1374	4.33288	1.93503e-07	1.15259e-06	0	40.1889
Bmac	-14.1321	4.32624	3.67581e-32	2.23345e-30	0	40.0528
Agtr1a	-14.1057	4.3001	2.34182e-37	1.90623e-35	0	39.3174
Smyd1	-14.0878	4.28335	6.61053e-10	5.5297e-09	0	38.8293
BC020535	-14.0708	4.26522	2.5922e-36	1.99101e-34	0	38.3829
Hs3st3b1	-14.0684	4.26256	2.50553e-29	1.2324e-27	0	38.3235
Ndn	-14.0178	4.21223	7.62226e-34	5.17744e-32	0	37.0002
Fam84a	-14.0086	4.20301	3.2745e-32	2.00179e-30	0	36.7666
Acta2	-13.9807	7.89646	1.54089e-65	1.48894e-62	0.0267388	476.427
Irf4	-13.9561	4.15082	2.55282e-35	1.87426e-33	0	35.4441
Ppp1r3d	-13.9527	4.14728	1.68761e-33	1.11841e-31	0	35.3674
Gpr120	-13.9483	4.143	2.38225e-34	1.65186e-32	0	35.2602
AK208554	-13.9464	4.14142	4.17573e-29	2.02729e-27	0	35.201
AK209715	13.9366	4.13056	6.21135e-35	4.43002e-33	34.9736	0
Xirp2	-13.9229	4.11904	8.15877e-06	3.72215e-05	0	34.6365
AK020764	-13.9209	4.11512	7.72226e-23	2.44009e-21	0	34.6005
Scn4b	-13.9117	4.10759	2.80071e-13	3.57458e-12	0	34.365
H2-Eb1	-13.9082	7.82337	4.66329e-70	8.73056e-67	0.0267232	452.895
Slc28a2	-13.9002	4.09524	7.81678e-32	4.6551e-30	0	34.0939
Apol7c	-13.8998	4.09462	1.61361e-34	1.12934e-32	0	34.0921
Gm4980	-13.8796	4.0747	1.00307e-30	5.46306e-29	0	33.6092
Cyp4f18	-13.8514	4.04621	8.85814e-33	5.59801e-31	0	32.9678
Unc45b	-13.8509	4.04683	8.39253e-17	1.56051e-15	0	32.9469
Galntl4	-13.8429	4.03778	2.08671e-32	1.28881e-30	0	32.7759
Cxx1c	-13.8412	4.0361	1.51589e-33	1.00907e-31	0	32.7335
Darc	-13.8268	4.02188	7.50927e-33	4.78596e-31	0	32.4045
Cd83	-13.8259	4.02067	4.44205e-30	2.33851e-28	0	32.3928
Arsi	-13.8168	4.01176	2.08142e-32	1.2882e-30	0	32.1878
PINK1	-13.8143	4.00781	1.52953e-05	6.67984e-05	0	32.1298
Chi3l1	-13.8138	4.0089	2.43137e-33	1.59369e-31	0	32.1177
Dcn	-13.8126	8.69946	9.71664e-59	4.28032e-56	0.0584604	831.281
Retnla	-13.7868	7.14666	1.43455e-53	3.49366e-51	0.0144727	283.285
Ppapdc3	-13.7863	3.9823	5.26856e-18	1.11062e-16	0	31.5027
Ms4a4b	-13.7824	3.97768	2.93459e-31	1.66488e-29	0	31.4208
Plxdc2	-13.7775	3.97279	1.13692e-31	6.70404e-30	0	31.3154
Adora2a	-13.7452	3.9401	2.33726e-28	1.07381e-26	0	30.6312
Islr	-13.7203	7.69325	2.81555e-65	2.40971e-62	0.0322087	413.825
Ptgir	-13.7073	3.9024	2.42917e-30	1.29939e-28	0	29.8349
Niacr1	-13.6792	3.87485	2.30986e-29	1.1399e-27	0	29.2518
mKIAA4145	13.675	3.86964	1.82013e-31	1.0485e-29	29.1694	2.56854e-10
Lrg1	-13.6645	7.06072	7.25359e-56	2.24001e-53	0.0194868	266.917
Vtn	-13.6639	3.85931	1.75346e-31	1.01595e-29	0	28.9477
Rai2	-13.6586	3.85411	2.06395e-31	1.1844e-29	0	28.8417
Lrrc25	-13.6499	3.84513	3.43492e-29	1.67306e-27	0	28.6721
Cd3e	-13.6477	3.84306	1.69802e-30	9.11547e-29	0	28.6272
Ms4a6b	-13.6414	3.83709	1.50138e-29	7.53333e-28	0	28.4952
Ptger3	-13.641	6.1615	1.77427e-43	2.18717e-41	0.00723636	143.091
Alox5ap	-13.6395	3.83504	5.43728e-31	3.00505e-29	0	28.46
Fcgr2b	-13.635	3.83069	5.62202e-30	2.92374e-28	0	28.37
Gata6	-13.6218	3.81687	2.66878e-24	9.50574e-23	0	28.1225
Fcrls	-13.6215	3.81736	1.12018e-27	4.9711e-26	0	28.1032
Agt	-13.6155	3.81117	8.96531e-30	4.57506e-28	0	27.9875
Fgl2	-13.6022	3.79756	4.77041e-29	2.3048e-27	0	27.7391
Tnfrsf13b	-13.6008	3.79565	4.95462e-21	1.34678e-19	0	27.7156
Zfp521	-13.569	3.76486	1.67287e-29	8.33793e-28	0	27.1007
Grrp1	-13.5675	3.76269	1.17255e-24	4.30965e-23	0	27.0827
Ccr7	-13.5605	6.12185	2.65092e-48	4.43623e-46	0.0122504	139.201
Aldh3b2	-13.5432	3.73897	2.40564e-30	1.2891e-28	0	26.6246
Flg2	-13.5392	3.73617	8.07046e-15	1.21544e-13	0	26.5423
Pde1b	-13.5291	3.72492	2.8964e-30	1.54106e-28	0	26.3653
Kcnj8	-13.5194	3.71537	9.11682e-30	4.64446e-28	0	26.1868
Nkg7	-13.5065	3.70235	6.44803e-30	3.34171e-28	0	25.9542
AK199495	-13.4846	3.68095	5.34278e-26	2.15691e-24	0	25.5585
Fat4	-13.4805	3.67654	2.4057e-29	1.18524e-27	0	25.4896
Nat8l	-13.4787	7.46141	7.27186e-58	2.90438e-55	0.0367853	352.375
Rcn3	-13.4746	6.03485	4.10652e-50	7.64041e-48	0.0122504	131.049
Eltd1	-13.4726	3.66905	1.37119e-24	5.02128e-23	0	25.3454
Ncf4	-13.4591	3.6549	3.63146e-28	1.65824e-26	0	25.1194
Fcrla	-13.4575	3.65335	1.52237e-28	7.14773e-27	0	25.0909
Rbm24	-13.4539	3.65137	2.90774e-13	3.70172e-12	0	25.0194
Lyve1	-13.4531	3.64942	7.78829e-27	3.29984e-25	0	25.0063
Hbb-b1	-13.4364	3.63248	3.16989e-29	1.55154e-27	0	24.7239
Hs3st6	-13.4355	3.63108	4.98622e-24	1.74082e-22	0	24.7153
Aldh1a7	-13.4112	3.60778	1.15506e-25	4.54067e-24	0	24.2906
Pygl	-13.4039	6.76883	2.57538e-62	1.51266e-59	0.0144727	218.008
Cacng1	-13.3961	3.59421	1.16256e-07	7.14057e-07	0	24.0389
Ablim2	-13.39	3.58658	2.76343e-26	1.1324e-24	0	23.9366
Fzd8	-13.3813	3.57709	5.26258e-24	1.83303e-22	0	23.8044
Ms4a4d	-13.378	3.57439	5.15203e-28	2.33478e-26	0	23.7399
Dmkn	-13.3721	3.57002	2.72453e-11	2.79115e-10	0	23.6397
Ccl21a	-13.359	3.55671	2.06512e-14	2.95701e-13	0	23.4251
3110079O15Rik	-13.3534	3.54937	9.82887e-25	3.63038e-23	0	23.3482
Atp2a1	-13.3486	10.7469	1.45514e-08	1.01938e-07	0.328192	3436.39
Igh-A (1g2)	-13.337	3.53328	6.84847e-28	3.07565e-26	0	23.0787
Pde7b	-13.332	3.52842	4.46953e-28	2.03164e-26	0	22.9977
1100001G20Rik	-13.3278	3.52465	8.3342e-25	3.09741e-23	0	22.9252
H2-Aa	-13.3251	8.56505	1.39482e-70	3.79834e-67	0.0679191	757.32
Mcpt4	-13.3246	3.52144	8.58002e-25	3.18481e-23	0	22.8741
mKIAA0268	-13.3217	3.51857	9.37073e-25	3.46544e-23	0	22.8283
Hp	-13.3092	7.57441	8.15062e-67	1.0173e-63	0.0289455	381.092
Cd48	-13.2992	3.49607	2.4235e-25	9.33109e-24	0	22.4751
Adrb1	-13.2938	3.49001	8.82733e-26	3.49922e-24	0	22.401
2810405K02Rik	-13.2831	3.48013	5.36611e-25	2.01937e-23	0	22.2265
Irx5	-13.2692	3.4653	2.72397e-23	8.94699e-22	0	22.0245
Cacna1s	-13.2397	5.90381	3.62372e-09	2.75364e-08	0.0122504	119.615
Hoxc9	-13.2386	3.43392	4.24423e-15	6.56017e-14	0	21.5627
Cd19	-13.2247	5.75069	3.15855e-58	1.35163e-55	0.00723636	107.601
Trim54	-13.2073	3.40639	6.83192e-07	3.74063e-06	0	21.0904
Fam20a	-13.1966	3.39343	8.52643e-27	3.59731e-25	0	20.9396
C1qtnf9	-13.1573	3.35477	7.1549e-24	2.45504e-22	0	20.3684
Ldoc1l	-13.1343	3.33123	5.86575e-26	2.36167e-24	0	20.0556
Ear2	-13.1294	3.32723	4.29222e-22	1.28379e-20	0	19.978
H2-DMb1	-13.1191	5.67601	5.26998e-56	1.67939e-53	0.0122504	102.164
Timd4	-13.1149	3.31238	3.89473e-25	1.48431e-23	0	19.7798
Olfml1	-13.1004	3.29801	7.52702e-25	2.80089e-23	0	19.5826
Sspo	-13.0991	3.29575	5.61061e-22	1.65582e-20	0	19.576
Igfals	-13.0924	5.65167	2.30384e-50	4.39563e-48	0.0122504	100.46
Kcna3	-13.0861	3.2826	3.54758e-20	8.97531e-19	0	19.4011
Gpx7	-13.0833	3.28036	4.38639e-25	1.66112e-23	0	19.3597
Casq1	-13.0621	7.1892	1.47686e-08	1.03315e-07	0.0289455	291.728
Fcrl1	-13.0482	3.24563	7.45364e-26	2.97302e-24	0	18.8912
Chrdl1	-13.044	3.24183	2.17783e-24	7.82216e-23	0	18.8313
Mfsd7a	-13.0438	3.24165	1.12302e-24	4.13268e-23	0	18.8299
Klhl6	-13.0395	3.23709	9.97516e-26	3.94724e-24	0	18.7758
Igfbp2	-13.0318	3.22839	4.41952e-19	1.0252e-17	0	18.6848
Fmod	-13.0303	3.22769	1.37478e-25	5.36918e-24	0	18.6588
Sbk2	-13.0044	3.20403	7.53125e-12	8.17386e-11	0	18.3193
Wscd2	-12.9975	3.19477	1.19666e-23	4.01861e-22	0	18.2427
Myo1g	-12.9719	6.33246	7.68344e-50	1.4034e-47	0.0144727	161.091
Hoxb2	-12.9692	3.16616	2.0291e-20	5.26247e-19	0	17.8904
Msc	-12.955	3.15276	4.16125e-25	1.58185e-23	0	17.7094
Rnase6	-12.9508	3.14884	7.15461e-25	2.66563e-23	0	17.655
C1qtnf5	-12.9502	3.14772	1.71818e-23	5.71868e-22	0	17.6547
Tmem233	-12.9297	3.1303	5.81438e-07	3.21703e-06	0	17.3971
2010110P09Rik	-12.929	3.12697	4.89086e-25	1.84516e-23	0	17.3916
Gli2	-12.928	3.1257	5.79141e-24	2.00557e-22	0	17.3843
Folr4	-12.9253	3.12283	3.94424e-23	1.27591e-21	0	17.3521
AK182887	12.9176	3.11419	5.69124e-25	2.13636e-23	17.2555	0
Kcns3	-12.9134	3.1115	6.28437e-25	2.35017e-23	0	17.2049
Baiap3	-12.9003	3.09759	2.28551e-20	5.89684e-19	0	17.0564
Lamc3	-12.896	5.4211	3.6788e-51	7.59988e-49	0.00723637	85.6123
Krt77	-12.8874	3.08761	3.14615e-12	3.5671e-11	0	16.8913
Clec14a	-12.8841	3.08232	1.00574e-24	3.7102e-23	0	16.86
3425401B19Rik	-12.8749	3.07585	1.78465e-07	1.06724e-06	0	16.7487
Ror2	-12.8616	3.05938	1.43396e-22	4.46047e-21	0	16.603
2310002L13Rik	12.8565	3.05322	1.93613e-24	6.98756e-23	16.5409	0
Itgal	-12.8499	5.37497	1.23319e-50	2.43027e-48	0.00723636	82.9154
Ahsg	-12.8475	3.04318	8.68644e-08	5.4356e-07	0	16.4414
Mypn	-12.8407	3.04193	5.52283e-06	2.60161e-05	0	16.3565
Kcnj11	-12.8349	3.03534	1.20373e-12	1.42577e-11	0	16.287
Atp1a2	-12.8313	8.45175	1.50515e-54	3.95499e-52	0.0979916	700.069
Serpina1b	-12.8295	3.02706	5.9709e-20	1.47573e-18	0	16.2396
Erg	-12.8108	3.00938	4.08168e-24	1.43674e-22	0	16.0238
Fer1l4	-12.793	2.99151	7.28827e-24	2.49224e-22	0	15.8294
Ccr6	-12.7898	2.98842	5.09036e-24	1.77511e-22	0	15.7925
Trdn	-12.7838	2.98542	5.83066e-06	2.73672e-05	0	15.7238
Abp1	-12.7829	2.98174	8.26386e-24	2.8162e-22	0	15.7158
AK193394	12.7789	2.97636	1.36548e-23	4.58038e-22	15.6696	0
Cd7	-12.7781	2.97638	1.69249e-22	5.23203e-21	0	15.6696
Myh1	-12.7773	6.20946	6.00306e-08	3.85305e-07	0.0194868	147.865
Ighg1	-12.7653	2.96265	1.02512e-16	1.88969e-15	0	15.5339
Grem2	-12.7626	2.96148	8.51198e-24	2.89417e-22	0	15.4965
BC055004	-12.7573	2.95645	5.73317e-23	1.82699e-21	0	15.4372
Ubash3a	-12.7547	2.95287	1.90152e-21	5.42477e-20	0	15.4178
Heyl	-12.7537	2.95276	2.36796e-23	7.80331e-22	0	15.4
Shisa3	-12.7427	2.94084	1.30273e-20	3.42609e-19	0	15.2912
Ldb2	-12.7382	2.93729	3.28568e-23	1.06868e-21	0	15.2347
Hoxb6	-12.7326	2.93088	4.48692e-21	1.2295e-19	0	15.1841
Dtx1	-12.7171	5.29331	9.19137e-29	4.37028e-27	0.0122504	78.3592
Dkkl1	-12.6813	2.8802	9.14179e-23	2.87348e-21	0	14.6506
Wnt2	-12.6795	2.87822	4.41492e-22	1.31853e-20	0	14.6335
Mstn	-12.6718	2.87423	6.48464e-06	3.01627e-05	0	14.549
Fbxo40	-12.6716	2.87394	7.3743e-07	4.01704e-06	0	14.5463
Cd2	-12.6656	2.86422	2.9809e-21	8.36075e-20	0	14.4939
Atoh8	-12.6615	2.8601	4.73221e-21	1.29101e-19	0	14.453
Clec3b	-12.6611	6.60993	1.31798e-51	2.8e-49	0.0317372	195.251
Mgll	-12.6455	8.82877	8.99731e-67	1.03659e-63	0.130824	909.19
Mfap5	-12.634	6.02976	7.61398e-56	2.32731e-53	0.0194868	130.561
Ccl8	-12.6313	2.83135	2.46871e-21	6.96329e-20	0	14.1451
Ch25h	-12.6298	2.82873	3.12168e-21	8.71481e-20	0	14.1393
Slfn1	-12.6276	2.82694	1.11182e-22	3.46921e-21	0	14.1148
Expi	-12.6169	2.81699	3.67355e-21	1.01514e-19	0	14.0039
Dhrs7c	-12.6166	2.81946	6.82902e-06	3.16319e-05	0	14.0028
Obscn	-12.5952	6.95038	5.06024e-13	6.25329e-12	0.0389736	247.192
Lctl	-12.5854	2.78578	8.23327e-21	2.20203e-19	0	13.7017
Creb3l1	-12.5731	2.77206	5.08814e-20	1.26591e-18	0	13.5947
Lmx1b	-12.5716	2.77011	1.12071e-17	2.2884e-16	0	13.5822
Smpdl3a	-12.5706	5.99646	1.23047e-56	4.23664e-54	0.0245009	127.585
Stab2	-12.5566	2.75632	2.52282e-22	7.6722e-21	0	13.4356
Cnrip1	-12.5338	2.73362	3.88597e-22	1.16754e-20	0	13.2254
Ccdc80	-12.5334	7.4162	2.98856e-65	2.48673e-62	0.0584604	341.468
Cxcl13	-12.5208	2.7207	5.41328e-22	1.60074e-20	0	13.1075
Des	-12.5078	7.06655	3.79522e-22	1.14142e-20	0.0411959	267.934
H1fx	-12.5028	2.70139	1.89087e-16	3.35749e-15	0	12.9497
Ttr	-12.5005	2.69713	1.38204e-06	7.21489e-06	0	12.9258
Sypl2	-12.4988	5.18563	4.87776e-07	2.73007e-06	0.0122504	72.6599
6530401D17Rik	-12.4931	2.69147	3.5868e-15	5.58144e-14	0	12.8633
Clca1	-12.4878	2.6888	2.61502e-20	6.70085e-19	0	12.8051
Mmd2	-12.4779	2.67857	1.34992e-21	3.88816e-20	0	12.7195
Slc43a1	-12.4758	5.00535	7.46066e-45	9.93262e-43	0.00726878	64.1438
Crhr2	-12.4567	2.66054	1.57675e-08	1.09892e-07	0	12.5317
Il1rl2	-12.4556	2.65671	2.00593e-20	5.21142e-19	0	12.5222
Fbxo27	-12.4489	2.64898	3.04246e-21	8.50158e-20	0	12.4711
Atp1b2	-12.4479	5.023	3.1055e-29	1.52251e-27	0.0122504	64.9154
Ptprc	-12.4367	6.75804	7.95229e-58	3.13435e-55	0.0389736	216.362
Duoxa1	-12.4344	2.63533	2.15789e-21	6.1096e-20	0	12.3414
Atp2a3	-12.4326	6.69032	2.22615e-51	4.66324e-49	0.0289455	206.449
Lrp3	-12.4266	4.94993	1.68419e-40	1.71599e-38	0.00723933	61.7404
Marco	-12.4265	2.62762	6.86457e-21	1.84751e-19	0	12.2728
Rem1	-12.4178	2.6177	7.56426e-20	1.85423e-18	0	12.2069
Cox8b	-12.408	4.92945	8.65663e-37	6.89652e-35	0.00723636	60.844
Fam26f	-12.4056	2.60487	8.20656e-17	1.52878e-15	0	12.1063
H2-DMb2	-12.4056	5.76658	9.64965e-47	1.46729e-44	0.0144727	108.797
Fmo1	-12.3945	4.91523	2.3943e-35	1.76219e-33	0.00723636	60.2454
Foxs1	-12.3782	2.57854	2.16338e-20	5.60103e-19	0	11.8756
Wfdc1	-12.3776	2.58021	2.62661e-16	4.60118e-15	0	11.8605
Dpep1	-12.368	6.68913	1.66046e-58	7.20858e-56	0.0389736	206.251
Tmprss11e	12.3676	5.6898	4.21077e-57	1.53821e-54	103.158	0.014965
Sh3bgr	-12.3545	2.5594	3.60475e-07	2.06345e-06	0	11.6747
AK007719	-12.3513	2.5534	8.84014e-19	1.99703e-17	0	11.647
C4b	-12.3264	8.12348	1.51062e-65	1.48894e-62	0.110657	557.564
Hephl1	-12.3227	2.52475	1.01528e-19	2.47056e-18	0	11.4196
Sncg	-12.3206	5.6865	8.87744e-56	2.6861e-53	0.0144727	102.901
AK081497	-12.3169	2.51827	4.1231e-21	1.1331e-19	0	11.3786
Rasgrf2	-12.3033	2.50506	8.8248e-21	2.35813e-19	0	11.2694
Kcna5	-12.3032	2.50472	4.85743e-21	1.32277e-19	0	11.2707
Wbscr17	-12.303	2.50516	7.25873e-20	1.7808e-18	0	11.2653
Wdfy4	-12.2988	5.69487	6.53354e-53	1.51715e-50	0.0194868	103.508
AK008665	12.2902	2.49011	1.18682e-20	3.13526e-19	11.1659	0
Inha	-12.2855	2.4864	1.07449e-19	2.60407e-18	0	11.1373
Tem8	12.2839	2.48427	4.30801e-20	1.0817e-18	11.1155	2.85779e-09
Actn3	-12.2836	7.87008	6.81577e-08	4.33198e-07	0.0896282	467.702
Ggt5	-12.2824	5.64853	5.42042e-56	1.70914e-53	0.0144727	100.23
Cpa3	-12.2771	2.48029	1.02015e-16	1.88168e-15	0	11.0622
Fox1	-12.267	2.47289	3.24164e-05	0.000134028	0	10.9882
Fgg	-12.2554	2.45736	1.12724e-20	2.98555e-19	0	10.9017
B230315N10Rik	12.2401	2.43978	1.18114e-20	3.12553e-19	10.7881	0
Upk3a	-12.2391	2.44196	9.17509e-19	2.07114e-17	0	10.7759
Prdm16	-12.2331	2.43454	6.26206e-20	1.54514e-18	0	10.7392
Rtn1	-12.2322	2.43369	3.60332e-20	9.0933e-19	0	10.7314
TCR-beta chain	-12.2293	4.78439	7.81338e-40	7.62377e-38	0.0121625	55.0305
Sult5a1	-12.2239	2.42713	1.14192e-17	2.33012e-16	0	10.6616
AK189601	12.2054	2.40594	4.40852e-20	1.10508e-18	10.5276	0
Ppap2b	-12.2013	7.08396	7.2551e-64	5.43316e-61	0.0584604	271.205
Actg2	-12.1991	2.40145	2.06127e-20	5.34128e-19	0	10.4851
Slc27a2	-12.1957	2.39775	2.17866e-20	5.63573e-19	0	10.4619
P2ry10	-12.1955	2.3982	8.43187e-20	2.06017e-18	0	10.4564
Slc2a13	-12.1944	2.39603	1.58961e-19	3.80021e-18	0	10.4555
Ifi27l2a	-12.1851	8.5639	7.48559e-68	1.01923e-64	0.155349	756.63
Kcnc4	-12.1798	2.38655	9.59333e-06	4.32653e-05	0	10.3433
Zap70	-12.1684	4.684	2.15365e-27	9.33613e-26	0.00723636	51.3442
Ntrk1	-12.1613	2.3624	2.7212e-17	5.32072e-16	0	10.2202
Nctc1	-12.1573	2.36437	3.543e-05	0.000145664	0	10.1837
Col15a1	-12.1377	7.5588	2.6986e-64	2.07273e-61	0.0801695	376.944
Barx2	-12.1273	2.33031	5.68777e-20	1.40924e-18	0	9.9754
Kcnn3	-12.1272	2.3297	5.75727e-20	1.4241e-18	0	9.97738
AK196959	-12.1245	2.32729	4.44401e-20	1.11305e-18	0	9.95686
Ntsr2	-12.1182	2.32095	5.06114e-20	1.26024e-18	0	9.91438
Ikzf1	-12.118	6.03279	3.5016e-42	4.04982e-40	0.0267232	130.853
Sucnr1	-12.1179	2.32185	8.91165e-18	1.83596e-16	0	9.90639
Cyp2f2	-12.117	4.64099	2.04578e-40	2.06335e-38	0.00723636	49.8179
Myct1	-12.1154	2.31839	5.54842e-20	1.37699e-18	0	9.89407
Gm16914	-12.1077	2.3115	1.89587e-18	4.1544e-17	0	9.83732
Htra3	-12.1071	8.15561	7.1625e-63	4.46985e-60	0.126379	570.115
Nos1	-12.0981	2.30198	1.80697e-18	3.96831e-17	0	9.7723
AK170106	-12.0885	2.29189	1.32452e-19	3.18939e-18	0	9.7096
AK004226	-12.0856	2.28495	2.26108e-10	2.0152e-09	0	9.69789
Asb11	-12.055	2.26296	1.76775e-06	9.06109e-06	0	9.48508
Cidea	-12.0532	5.45429	1.49006e-33	9.94096e-32	0.0194868	87.5673
Gpd1	-12.0526	9.53664	1.69693e-70	3.91011e-67	0.342387	1484.98
Trpv1	-12.0433	2.24701	1.40664e-19	3.37358e-18	0	9.41089
Fam70b	-12.0415	2.24453	1.87124e-19	4.45362e-18	0	9.40246
Lrmp	-12.0413	4.56499	6.69738e-39	6.00658e-37	0.00723636	47.2572
Tmem100	-12.0331	2.23729	6.85627e-19	1.56182e-17	0	9.34268
Negr1	-12.0304	2.23452	6.20215e-19	1.41605e-17	0	9.32499
Rnls	-12.0158	2.21813	1.87562e-17	3.72822e-16	0	9.23937
Adig	-12.0063	5.89225	1.58416e-53	3.79629e-51	0.0217091	118.68
Ugt1a6b	-12.0059	4.57317	5.77301e-35	4.13709e-33	0.0122504	47.5072
Cldn11	-12.0021	2.205	1.6694e-18	3.67968e-17	0	9.15066
4930578C19Rik	-11.9948	2.19908	4.74208e-19	1.0969e-17	0	9.09843
Car4	-11.9921	2.19689	5.55873e-18	1.1685e-16	0	9.07922
Prelp	-11.9834	6.33402	9.28273e-56	2.78064e-53	0.0439877	161.216
Tshz2	-11.9832	4.50671	4.10347e-38	3.48214e-36	0.00723636	45.3821
AK079954	-11.9795	2.18444	5.37353e-18	1.13116e-16	0	9.00076
Sec14l4	-11.9763	2.18086	9.87656e-19	2.22278e-17	0	8.98183
Dchs1	-11.975	5.33894	1.02834e-48	1.75022e-46	0.0144727	80.8616
Chst1	-11.9739	6.42481	3.62938e-59	1.69872e-56	0.0436226	171.707
Spdef	-11.9653	2.1686	1.78233e-18	3.91707e-17	0	8.92046
Rftn1	-11.9642	5.40899	2.46388e-36	1.89731e-34	0.0245009	84.8891
R3hdml	-11.9498	2.15382	2.91705e-19	6.84263e-18	0	8.82205
Tal1	-11.9468	2.15092	2.80445e-19	6.5888e-18	0	8.80337
Phkg1	-11.9348	4.54575	2.15685e-17	4.25615e-16	0.00795248	46.5957
Cav3	-11.9241	2.13361	1.96326e-06	9.98462e-06	0	8.66201
Ffar1	-11.9057	2.10846	7.22777e-16	1.2177e-14	0	8.56177
Sctr	-11.8987	2.10386	1.5786e-18	3.49239e-17	0	8.51147
Cd209d	-11.8985	2.10475	2.98704e-16	5.2173e-15	0	8.50734
AK010044	-11.8934	2.1035	4.32563e-05	0.000175077	0	8.48045
Mirg	-11.8857	2.09174	4.64938e-17	8.85955e-16	0	8.4331
Cd86	-11.8843	2.09012	1.18146e-17	2.40752e-16	0	8.4259
Vat1l	-11.8832	2.08956	2.27433e-16	4.01222e-15	0	8.41788
Cacna1g	-11.8662	5.22959	7.88506e-47	1.21127e-44	0.0144728	74.9531
Mc2r	-11.8578	2.06362	6.53708e-18	1.36174e-16	0	8.2728
Serpina1e	-11.8504	2.05552	1.05579e-18	2.37078e-17	0	8.23357
Ucp3	-11.8377	4.40334	3.06723e-36	2.34984e-34	0.0122504	42.2276
P2ry13	-11.8313	2.03709	3.11965e-18	6.69885e-17	0	8.12342
Kcna1	-11.8285	2.03527	1.44197e-16	2.59892e-15	0	8.10514
Ces1f	-11.8276	4.34937	5.38829e-33	3.47858e-31	0.00723636	40.6704
AK188430	11.8269	2.02973	1.83606e-18	4.02924e-17	8.09929	0
Tusc1	-11.8234	2.02592	1.32328e-13	1.74697e-12	0	8.08758
Kbtbd13	-11.8214	2.02905	1.08858e-14	1.61508e-13	0	8.06397
Meox1	-11.8202	2.02587	2.17578e-18	4.73659e-17	0	8.06181
2010003K11Rik	-11.8143	2.01994	1.87158e-18	4.10418e-17	0	8.0298
Hhatl	-11.809	4.26851	5.95705e-07	3.29231e-06	0.00723636	38.423
Orm1	-11.8076	4.32928	1.03914e-32	6.53936e-31	0.00723636	40.1064
Slc13a3	-11.8061	2.01145	2.00997e-18	4.38838e-17	0	7.98583
Glt25d2	-11.8049	2.01058	2.28699e-18	4.96426e-17	0	7.9771
Ly6c1	-11.7976	6.85863	6.8034e-53	1.56766e-50	0.0606828	231.952
Jph2	-11.7958	5.26859	5.59847e-24	1.941e-22	0.0245009	76.9668
Cyp3a57	-11.7922	1.99963	8.58501e-16	1.43667e-14	0	7.90299
Ar	-11.7875	1.99163	2.00699e-16	3.55946e-15	0	7.88722
Glb1l2	-11.785	6.04246	1.35055e-46	2.00276e-44	0.0289539	131.702
Dsc3	-11.7798	1.98711	3.76356e-16	6.50534e-15	0	7.83529
Smpx	-11.7777	1.98934	4.84696e-05	0.000194412	0	7.82668
Apoc1	-11.7698	1.97508	6.17302e-18	1.28859e-16	0	7.78849
AW551984	-11.7683	1.97552	1.68168e-16	3.00566e-15	0	7.77334
Gucy1b3	-11.7678	1.97487	6.18772e-17	1.16501e-15	0	7.77159
Prr16	-11.7596	1.96476	1.19618e-17	2.43421e-16	0	7.73404
Alox5	-11.7353	1.94184	6.43979e-18	1.34241e-16	0	7.60133
Cd5	-11.7341	4.25569	2.06126e-32	1.27837e-30	0.00723636	38.128
Sidt1	-11.7288	4.25214	2.65771e-35	1.94649e-33	0.00723636	38.0271
Robo4	-11.724	5.64038	3.17838e-55	9.06746e-53	0.0267232	99.6544
Zfp366	-11.7224	1.92683	1.562e-15	2.53878e-14	0	7.53996
Foxi1	-11.722	1.92843	6.01421e-18	1.25807e-16	0	7.53192
Irx4	-11.719	1.92357	8.64499e-16	1.4459e-14	0	7.52187
Slit3	-11.7142	6.751	4.72881e-58	1.96738e-55	0.0556686	215.288
Fitm1	-11.709	4.36539	8.04246e-09	5.81913e-08	0.0122504	41.0959
BC021614	-11.7077	1.91324	3.71023e-17	7.17494e-16	0	7.4616
Lgi3	-11.7059	1.91224	7.2015e-18	1.49806e-16	0	7.44955
Il24	11.6996	1.90304	7.69609e-18	1.59541e-16	7.41577	0
Msl3l2	-11.6938	1.89819	6.86763e-15	1.04109e-13	0	7.39233
Lilra6	-11.6907	1.89819	3.09839e-17	6.02286e-16	2.27819e-10	7.36817
Csf2ra	-11.6873	6.55786	1.13348e-46	1.71481e-44	0.0539932	188.306
Gimap3	-11.6793	5.35536	8.89572e-51	1.77647e-48	0.025167	81.7747
Cytl1	-11.6757	1.88364	1.09937e-16	2.01663e-15	0	7.29069
Mgmt	-11.6731	1.88026	1.29539e-17	2.62186e-16	0	7.27997
Gsc	-11.6715	1.87625	4.9615e-15	7.63337e-14	0	7.27912
Cyp2j9	-11.6639	1.87178	7.13478e-17	1.33493e-15	0	7.23149
AK009067	11.6628	1.86718	1.58531e-17	3.17859e-16	7.22737	0
Gm2506	-11.6514	1.85953	9.50714e-17	1.75794e-15	0	7.16927
Pth1r	-11.6491	6.20742	1.66001e-52	3.6033e-50	0.0361818	147.683
Dscaml1	-11.6446	1.84986	1.89003e-15	3.04714e-14	0	7.14417
Slc16a7	-11.644	1.85278	1.00441e-15	1.66872e-14	0	7.13095
Wnt7a	11.6388	5.48283	2.03575e-53	4.80164e-51	89.3544	0.0224475
Cd3g	-11.6376	1.84503	1.55975e-17	3.12943e-16	0	7.10378
Capn8	-11.6368	1.84477	4.35416e-17	8.32347e-16	0	7.09778
Pdzk1ip1	-11.6351	1.84411	1.57643e-15	2.55946e-14	0	7.08709
Asb12	-11.6225	1.83555	9.23816e-08	5.75919e-07	0	7.02569
Cst7	-11.6201	1.82776	1.85754e-17	3.70334e-16	0	7.01809
Dpyd	-11.6197	1.82839	2.48411e-16	4.36943e-15	0	7.01286
Tlr12	-11.6123	1.81869	1.10863e-16	2.03113e-15	0	6.98415
Lrrc30	-11.6121	1.82596	1.58647e-05	6.90537e-05	0	6.97675
Pcdhgb4	-11.5994	1.80633	3.99867e-17	7.70291e-16	0	6.9207
Apoc3	-11.5905	1.79625	2.51592e-15	4.00448e-14	0	6.88097
AK041310	-11.5894	1.79788	5.62463e-17	1.063e-15	0	6.86856
Pm20d1	-11.586	1.79577	3.79192e-15	5.89144e-14	0	6.84973
Pecam1	-11.5822	6.19824	7.62882e-55	2.09653e-52	0.04621	146.721
Emx2	-11.5699	1.77459	4.38549e-13	5.46e-12	0	6.78456
Olfr78	-11.5661	1.77593	2.55728e-15	4.06384e-14	0	6.75584
Kif19a	-11.5642	1.77138	9.00648e-17	1.67156e-15	0	6.75466
Btk	-11.5522	1.76084	5.10486e-17	9.67823e-16	0	6.69405
Mets1	11.5465	1.74856	1.07226e-15	1.77653e-14	6.67701	0
Cldn22	-11.545	1.75288	4.07133e-17	7.8328e-16	0	6.66387
Hpgd	-11.5387	1.74797	1.54326e-16	2.77314e-15	0	6.63054
Hcn4	-11.5385	1.74546	4.26401e-16	7.30711e-15	0	6.63657
Olfr558	-11.5318	1.74204	2.96661e-15	4.67777e-14	0	6.59702
TCRBVbeta5.1/Jbeta1.5	-11.5263	1.77557	3.48363e-17	6.75419e-16	8.72242e-05	6.7707
Ctss	-11.5231	4.04568	6.08113e-32	3.63593e-30	0.00723637	32.9371
Epb41l4a	11.5226	1.73057	2.85849e-15	4.51615e-14	6.55204	0
Sec14l5	-11.522	1.73619	2.16705e-08	1.48206e-07	0	6.55188
Kctd12	-11.5181	6.85391	1.11025e-40	1.15478e-38	0.0730667	231.211
Trhde	-11.5132	1.7212	7.50912e-17	1.40234e-15	0	6.51905
Srgap1	-11.5074	1.71601	4.88669e-17	9.28813e-16	0	6.49092
Gm16844	-11.5004	1.71021	3.10888e-16	5.41434e-15	0	6.45614
St8sia6	-11.4971	1.703	1.04538e-13	1.39361e-12	0	6.45069
Treml2	-11.4896	4.05896	1.81018e-31	1.04679e-29	0.0122504	33.2465
Tmem132e	-11.4817	1.68884	2.81381e-15	4.45024e-14	0	6.38112
GLUTX1	-11.4792	1.6866	1.30155e-15	2.12931e-14	5.59865e-09	6.36955
C5ar1	-11.474	3.9963	3.76269e-31	2.1107e-29	0.00723636	31.8251
Il17b	-11.4602	1.66748	3.70994e-15	5.76707e-14	0	6.28659
Gm14085	-11.4599	1.67005	2.91203e-16	5.09222e-15	0	6.2779
Pck1	-11.4461	6.31469	4.40036e-59	1.99716e-56	0.0538507	159.068
Dusp26	-11.4442	1.65402	1.19225e-16	2.17635e-15	0	6.21146
Cacna1e	-11.4438	1.65245	1.94054e-16	3.44365e-15	0	6.2133
Clic6	-11.441	1.65094	1.2863e-16	2.3324e-15	0	6.19786
Lama1	-11.439	1.64866	1.02791e-16	1.8925e-15	0	6.18999
Lce1m	-11.4368	1.64953	4.61374e-13	5.72751e-12	0	6.17512
Cpz	-11.4334	4.0045	8.47476e-30	4.33951e-28	0.0122504	32.0148
Col6a6	-11.4311	1.64127	1.72661e-16	3.08043e-15	0	6.15468
Ccnb1ip1	11.4287	1.63499	1.10854e-16	2.03113e-15	6.14468	0
Prkaa2	-11.427	3.93177	6.11063e-16	1.03415e-14	0.00723636	30.4064
Znf451	-11.4236	1.63339	1.03239e-16	1.89959e-15	0	6.12452
Stk32c	-11.4194	1.62767	9.77688e-16	1.62613e-14	0	6.11051
Anpep	-11.4102	5.73194	1.10626e-52	2.51045e-50	0.0389736	106.171
Fam57b	-11.4071	4.77134	6.51954e-42	7.48249e-40	0.014491	54.5255
tagL	-11.3994	1.60533	5.50919e-12	6.08285e-11	0	6.02889
5830411N06Rik	-11.3979	1.6066	7.61694e-16	1.28039e-14	0	6.01974
Larp6	-11.3959	1.60416	2.583e-15	4.10181e-14	0	6.0122
Krt36	-11.3929	1.60287	1.41066e-16	2.5471e-15	0	5.99577
Aoc3	-11.3898	8.40478	1.04897e-63	7.2668e-61	0.250578	677.494
Meox2	-11.3882	3.91067	7.78307e-31	4.27e-29	0.00723636	29.9933
Chst4	-11.3843	1.59268	3.3442e-15	5.23657e-14	0	5.96424
Penk	-11.3779	3.89992	3.91084e-30	2.06977e-28	0.00723636	29.7735
Col5a2	-11.3775	5.99343	9.98393e-57	3.51846e-54	0.04621	127.29
Col5a3	-11.3774	7.22362	2.08938e-62	1.2773e-59	0.111907	298.731
Prox1	-11.3596	1.56868	1.41012e-15	2.30192e-14	0	5.86227
Col13a1	-11.3543	1.56176	2.29183e-13	2.95531e-12	0	5.84303
Gpr27	-11.3537	1.56012	6.29647e-12	6.89367e-11	0	5.8409
Smoc1	-11.3492	6.18158	2.13581e-56	7.18855e-54	0.0484322	145.043
Unc5a	-11.3401	5.29569	4.28917e-37	3.45382e-35	0.0317372	78.4618
Prdm6	-11.3392	1.54722	7.23389e-14	9.81836e-13	0	5.78187
Stat4	-11.3387	1.55001	3.97488e-16	6.84297e-15	0	5.77279
Rgs5	-11.3373	3.85724	1.31403e-26	5.48979e-25	0.00723636	28.8857
Csf1r	-11.3309	6.72893	6.61525e-58	2.67784e-55	0.0751554	211.989
Sox18	-11.3308	5.94767	3.78448e-45	5.10649e-43	0.04621	123.328
Icos	-11.3255	1.53682	3.62776e-16	6.27785e-15	0	5.72106
Gabra3	-11.3252	1.53857	4.45331e-14	6.16731e-13	0	5.71546
Rasal1	-11.3228	3.84111	1.82688e-25	7.0703e-24	0.00723636	28.5897
E130203B14Rik	-11.3207	1.53163	3.21405e-16	5.57804e-15	0	5.70298
Col6a3	-11.3155	7.32341	7.59518e-60	3.66957e-57	0.116351	320.136
1190002H23Rik	-11.3144	7.2919	1.13195e-48	1.91568e-46	0.111337	313.229
Nova1	-11.3076	3.82755	2.19166e-26	9.00564e-25	0.00723636	28.2954
Ccl11	-11.3066	3.82593	1.23262e-25	4.82654e-24	0.00723636	28.2622
mDj10	-11.2977	1.50898	4.12745e-16	7.09339e-15	0	5.6127
Tcap	-11.2966	5.92351	4.49283e-08	2.93849e-07	0.04621	121.228
Slc6a13	-11.2956	1.50805	1.60994e-15	2.60962e-14	0	5.60145
A530016L24Rik	-11.2934	7.22436	1.71155e-60	8.40483e-58	0.114129	298.886
Tmem26	-11.2822	1.49397	5.38839e-16	9.17099e-15	0	5.5517
Actc1	-11.2811	3.76933	1.74815e-10	1.58396e-09	0.00723636	27.1508
Tspan6	-11.2764	1.48977	9.01754e-15	1.34993e-13	0	5.52604
9030418K01Rik	-11.2645	1.47669	7.23407e-16	1.21808e-14	0	5.4837
Lrrc38	-11.2632	1.48307	7.62544e-05	0.00029466	0	5.47719
Ptafr	-11.2582	4.65732	2.26708e-39	2.14229e-37	0.0194868	50.3637
Trfr2	-11.2368	1.44657	2.98319e-14	4.19144e-13	0	5.38509
Lmod2	-11.2303	1.45062	2.24216e-05	9.51195e-05	0	5.35305
BC141885	-11.2264	1.43711	5.77399e-15	8.83349e-14	0	5.34572
Mogat1	-11.2234	1.43686	2.42828e-15	3.87529e-14	0	5.32811
Ccl21c	-11.2197	1.43251	9.71202e-16	1.61714e-14	0	5.31618
Adamtsl1	-11.2114	3.73383	3.98286e-29	1.93679e-27	0.00723636	26.5199
Tmem45a	-11.2108	1.42727	3.82646e-12	4.29133e-11	0	5.27864
Igfbp3	-11.2086	5.46154	1.35794e-39	1.29959e-37	0.0289455	88.0343
Magix	-11.2056	1.42403	1.02493e-09	8.40918e-09	7.73756e-09	5.2598
Cd163l1	-11.1978	1.40889	5.98919e-15	9.14405e-14	0	5.24031
BC054394	-11.1968	1.41129	1.18236e-14	1.74557e-13	0	5.22947
Cacna1d	-11.1965	1.40872	1.18932e-15	1.9564e-14	0	5.23334
Lipo1	-11.1962	1.40784	2.40114e-15	3.83401e-14	0	5.23362
Radil	-11.1933	3.76709	3.30938e-27	1.42432e-25	0.0122504	27.1444
Fsd2	-11.1912	3.78312	2.41679e-19	5.70364e-18	0.0122504	27.4187
Krt1	-11.1903	1.40942	4.47664e-09	3.35917e-08	0	5.20432
Ccr1	-11.183	1.39795	2.1602e-14	3.08578e-13	0	5.1795
Muc15	-11.1822	1.39841	5.93925e-13	7.2914e-12	0	5.17519
Batf	-11.179	1.38894	2.45142e-13	3.1516e-12	0	5.17454
Lmod3	-11.1766	1.39786	6.46613e-06	3.00952e-05	0	5.15714
Zic5	11.1707	1.37902	1.26691e-15	2.07605e-14	5.14042	0
Fgd5	-11.1673	3.74013	5.23661e-28	2.36953e-26	0.0122504	26.6364
Gpr132	-11.1648	5.04958	2.33385e-45	3.19225e-43	0.0217091	66.1395
Ehhadh	-11.1581	3.67931	6.76486e-27	2.87028e-25	0.00723636	25.5265
Clec1a	-11.1554	1.37007	6.08352e-15	9.26917e-14	0	5.08217
Gpr171	-11.1546	1.36861	2.05976e-15	3.30831e-14	0	5.08107
Vgll2	-11.1525	1.37433	1.14745e-05	5.10878e-05	0	5.07177
Pcdhga7	-11.1515	1.36652	1.06974e-14	1.59027e-13	0	5.06806
Scg3	-11.1496	3.66928	1.2253e-25	4.80417e-24	0.00723637	25.3683
Ikzf3	-11.1494	4.59012	1.81615e-31	1.04822e-29	0.0200879	48.0867
Ky	-11.1426	4.42074	4.31654e-08	2.83184e-07	0.0144727	42.7057
A930038C07Rik	-11.1344	1.34454	9.00032e-13	1.08231e-11	0	5.01741
Aldh1l1	-11.1319	5.74807	2.17236e-55	6.44288e-53	0.04621	107.366
Slc2a12	-11.1316	1.34881	1.09331e-12	1.30116e-11	0	4.99665
Mag	-11.1272	1.3408	1.96625e-15	3.16825e-14	0	4.98712
H2-Oa	-11.1269	4.57462	9.11559e-32	5.40708e-30	0.0245009	47.5654
Serpina3k	-11.1254	1.33188	2.70258e-08	1.82119e-07	0	4.9858
Cd209a	-11.1224	1.33877	9.56943e-14	1.28199e-12	0	4.96563
Fgb	-11.119	1.3321	3.12314e-15	4.9058e-14	0	4.96019
mKIAA0602	11.1126	1.32077	3.26439e-15	5.11427e-14	4.93929	0
Gpr88	-11.1104	1.31977	1.63083e-11	1.70215e-10	0	4.93504
Fcgr3	-11.107	3.68701	1.50557e-23	5.03903e-22	0.0122504	25.6532
5830405N20Rik	-11.1053	1.31918	2.47792e-15	3.95029e-14	0	4.9123
Myo18b	-11.1032	3.76682	6.71465e-08	4.27134e-07	0.0122504	27.0968
Cyp2d9	-11.1004	1.30543	2.60801e-05	0.000109692	0	4.89806
Krt79	-11.0966	1.31568	4.52565e-11	4.49191e-10	0	4.87601
Heph	-11.0961	3.67502	3.83641e-24	1.35359e-22	0.0122504	25.4414
Gm11428	-11.0935	1.31146	1.90277e-12	2.21521e-11	0	4.86606
Myoz1	-11.0907	5.71882	1.1425e-06	6.04336e-06	0.04621	105.171
Clec12a	-11.09	1.30638	3.95423e-14	5.49902e-13	0	4.85573
IAN5	-11.0861	1.29862	2.07858e-14	2.97344e-13	0	4.8501
Nid2	-11.0845	5.34748	8.28878e-48	1.33489e-45	0.0289491	81.3267
AK183458	-11.0822	1.30571	8.97438e-05	0.000342586	1.12025e-10	4.83077
Serpina3b	-11.0794	1.30262	7.14817e-06	3.29928e-05	0	4.82066
C6	-11.076	1.29328	2.27607e-13	2.93718e-12	0	4.80784
mKIAA0970	11.0748	1.29096	3.05724e-12	3.47024e-11	4.79954	0
Myom3	-11.0715	1.29303	1.01871e-08	7.28814e-08	0	4.79245
Pla2g2f	-11.0703	1.29316	6.89032e-07	3.77054e-06	0	4.78946
Cd79a	-11.0691	6.99846	1.80735e-51	3.81261e-49	0.114129	255.544
Cldn8	-11.0668	1.28278	1.14384e-14	1.69204e-13	0	4.77948
smoc2	-11.0635	3.57419	1.67525e-18	3.68986e-17	0.00723636	23.7568
Ppp1r3a	-11.056	1.28012	9.31973e-05	0.00035455	0	4.74391
Enpep	-11.0546	4.41036	3.1965e-31	1.80322e-29	0.0144727	42.4213
Bmp6	-11.0546	3.62928	2.0864e-26	8.63235e-25	0.0122504	24.6621
Hhex	-11.0522	4.49687	1.97991e-18	4.32592e-17	0.0158574	45.0884
Tbx21	-11.0479	1.25951	6.33326e-13	7.74655e-12	0	4.725
1110013L07Rik	-11.0419	1.25523	2.23121e-14	3.17963e-13	0	4.70354
Msln	11.0393	8.11386	3.55773e-56	1.14593e-53	553.726	0.253366
2310046A06Rik	-11.0313	1.25455	1.5287e-07	9.22489e-07	0	4.66121
C1qtnf4	-11.0229	1.23704	1.17664e-14	1.73798e-13	0	4.64117
Rab7b	-11.0219	1.24406	3.90244e-09	2.94932e-08	0	4.63016
Gfra3	-11.0219	1.23724	5.44222e-15	8.36008e-14	0	4.6355
Thbd	-11.0211	6.44298	2.08089e-57	7.79162e-55	0.0801695	173.848
Srpx2	-11.017	3.5936	2.32842e-25	8.97657e-24	0.0122504	24.0443
Hrasls	-11.0139	1.23792	7.19894e-07	3.93153e-06	0	4.60551
Vwf	-11.0126	5.81753	5.08289e-52	1.09538e-49	0.0434182	112.67
Krtdap	-11.0099	1.23429	1.66863e-06	8.58531e-06	0	4.59322
Igh	-11.0099	6.57185	5.5151e-58	2.26308e-55	0.0874059	190.092
B3gnt5	-11.0011	1.2177	1.01316e-14	1.50985e-13	0	4.56756
H4	-10.9953	1.21034	9.56483e-15	1.42687e-13	0	4.55263
Sod3	-10.9951	7.35198	1.27092e-52	2.86244e-50	0.150311	326.515
Zim1	-10.9871	1.20574	2.51276e-13	3.22493e-12	0	4.52044
Arhgap20	-10.9787	1.1959	1.64833e-14	2.38876e-13	0	4.49651
Adamts3	-10.9758	1.19344	2.89015e-14	4.0741e-13	0	4.48668
Cpxm2	-10.9728	1.18981	1.24336e-14	1.83201e-13	0	4.47861
Avpr1a	-10.9697	1.18421	3.53259e-14	4.94018e-13	0	4.47383
1110032F04Rik	-10.9678	1.17853	1.11566e-10	1.04176e-09	0	4.47086
Tmem182	-10.9662	3.5604	2.35689e-18	5.10858e-17	0.0122504	23.4803
AK155516	-10.9645	1.18335	1.90062e-13	2.46999e-12	0	4.45037
mKIAA1805	10.9633	1.16791	4.11132e-12	4.60047e-11	4.46001	0
AK194036	-10.9613	1.17671	1.59354e-14	2.31272e-13	0	4.44687
Gm684	-10.9602	1.17849	5.81248e-14	7.95035e-13	0	4.43808
Pcdhga12	-10.9591	1.17511	1.06078e-14	1.57775e-13	0	4.43888
Ugt1a7c	-10.958	1.17562	2.17055e-14	3.09908e-13	0	4.43231
Trpc3	-10.9515	1.16841	1.10303e-14	1.63409e-13	0	4.41415
Prrx2	-10.9471	3.46467	1.76835e-22	5.44968e-21	0.00723636	22.0072
Mmrn1	-10.9357	1.15367	2.333e-14	3.31996e-13	0	4.36456
Gpc3	-10.9355	5.55212	6.38812e-52	1.36683e-49	0.04621	93.7175
P2rx1	-10.9303	1.14822	2.24465e-14	3.19726e-13	0	4.34823
Mrgprf	-10.9285	4.28869	5.18709e-35	3.72613e-33	0.0144727	38.9955
Cmklr1	-10.9283	6.37959	1.49241e-57	5.73142e-55	0.081943	166.366
AK216824	10.9256	1.13943	2.97027e-14	4.17525e-13	4.33213	0
En1	-10.9214	1.13417	6.96731e-12	7.58286e-11	0	4.32914
BC013712	-10.9099	4.31057	9.8169e-35	6.91919e-33	0.0194868	39.5917
Acsm5	-10.9087	1.12711	2.8447e-14	4.01191e-13	0	4.28362
Muc20	-10.9087	1.12777	7.3619e-14	9.95602e-13	0	4.2823
Lhx8	-10.9066	1.12619	1.57572e-13	2.06296e-12	0	4.27554
BC043934	-10.9037	1.11993	2.9503e-14	4.15106e-13	0	4.2729
AK014974	-10.9004	1.11588	8.7946e-14	1.1803e-12	0	4.2644
Parm1	-10.9	4.7823	2.16047e-40	2.1717e-38	0.0217091	54.9311
Trf	-10.8957	8.8488	4.92011e-62	2.78079e-59	0.487374	921.546
Rcsd1	-10.8957	4.88349	3.60968e-40	3.60426e-38	0.0367513	58.9144
Sdk1	-10.891	3.41125	1.96125e-24	7.06972e-23	0.00723636	21.1993
Coro1a	-10.8907	8.02772	1.15175e-43	1.43156e-41	0.272245	521.597
D130017N08Rik	-10.8868	1.10655	1.32536e-13	1.74895e-12	0	4.21737
Twist2	-10.8788	3.98321	1.16074e-27	5.1435e-26	0.0118468	31.5507
Ido1	-10.8784	3.40009	2.69847e-25	1.03367e-23	0.00723636	21.0205
Fam20c	-10.876	4.27782	2.81063e-31	1.60062e-29	0.0194868	38.7073
Btla	-10.8731	3.39506	1.17823e-25	4.62566e-24	0.00723636	20.949
Abca9	-10.8643	3.44941	8.09009e-21	2.16761e-19	0.0122504	21.7399
mKIAA0053	-10.8624	1.08012	2.67563e-14	3.78237e-13	0	4.15106
Cck	-10.8553	1.07153	1.3402e-13	1.76698e-12	0	4.13307
qbrick	-10.8517	1.07304	8.12029e-13	9.82405e-12	0	4.11514
AK142678	-10.8294	1.05005	1.39924e-13	1.83915e-12	0	4.05327
Tlr11	-10.8148	1.03597	2.31537e-13	2.98264e-12	0	4.01196
N28178	-10.8147	1.03304	4.08425e-14	5.66668e-13	0	4.0162
Wdr86	-10.8113	3.39138	1.04835e-22	3.28143e-21	0.0122504	20.905
Akr1c18	-10.8071	1.0296	1.80276e-12	2.10944e-11	0	3.98924
Gjb1	-10.8061	1.01893	4.03924e-10	3.47489e-09	0	3.99717
Hspa12a	-10.8033	4.75495	3.63286e-40	3.61536e-38	0.0317372	53.8893
Msr1	-10.8001	1.02243	1.11366e-12	1.32327e-11	0	3.97018
Icam2	-10.7922	4.19316	3.71763e-34	2.55417e-32	0.0194868	36.4875
Crkr	-10.7901	1.00962	4.58802e-14	6.34506e-13	0	3.94716
Casr	-10.7882	1.01841	3.57545e-05	0.000146877	0	3.93886
Ccbp2	-10.7872	3.30841	6.9175e-24	2.37978e-22	0.00723636	19.7176
Ms4a6d	-10.7816	1.00499	4.32765e-12	4.82632e-11	0	3.91895
Atp6v1b1	-10.7799	4.66181	3.52368e-39	3.25777e-37	0.0217091	50.5246
AK156636	-10.7705	0.985076	4.81083e-11	4.75606e-10	0	3.89963
Tmem195	-10.7705	3.28775	3.58595e-20	9.05709e-19	0.00723636	19.4277
Srpx	-10.7694	5.35913	3.70307e-50	6.93283e-48	0.0411959	81.966
Timp4	-10.7693	4.64932	3.25352e-37	2.62693e-35	0.0217091	50.0816
Ablim3	-10.7668	4.71942	6.73992e-39	6.0267e-37	0.0317372	52.5727
AK207899	10.762	0.974638	8.17364e-14	1.10091e-12	3.87361	0
Mfap2	-10.7597	5.59163	2.51682e-50	4.77161e-48	0.0484323	96.322
LOC100048885	-10.7597	0.98051	7.575e-14	1.02396e-12	0	3.86348
2310002L09Rik	-10.7593	0.990449	0.000123745	0.000460127	0	3.86097
Gm1673	-10.7549	0.969465	8.53997e-11	8.14697e-10	0	3.85779
Fcamr	-10.7486	0.968516	6.71153e-14	9.13421e-13	0	3.83597
Svep1	-10.7453	5.86275	1.62479e-54	4.23222e-52	0.0627592	116.239
Arhgap15	-10.7425	0.964949	3.24028e-13	4.09202e-12	0	3.81572
Lrrn2	-10.7374	3.2572	6.34659e-23	2.01603e-21	0.00723636	19.0456
Dsg1a	-10.7287	0.958803	2.36388e-07	1.38979e-06	0	3.77786
Emcn	-10.7286	3.24671	1.65415e-20	4.32373e-19	0.00723636	18.8811
Sln	-10.7282	0.960225	0.000127348	0.000472411	0	3.77866
Plcl2	-10.7274	3.24959	7.10685e-25	2.65113e-23	0.00723636	18.9361
Cap2	-10.7208	3.22822	3.3018e-12	3.7351e-11	0.00727884	18.6249
Shank3	-10.7206	6.25146	1.5299e-42	1.79719e-40	0.0823918	152.224
Kcnc2	-10.7075	0.929074	1.01677e-13	1.35788e-12	0	3.72653
Myod1	-10.7066	0.93892	3.8602e-05	0.000157559	0	3.72186
AK080982	-10.6973	0.922936	1.30981e-11	1.38299e-10	0	3.69612
Stard8	-10.6949	5.06639	9.47463e-46	1.32623e-43	0.0406049	66.8929
AF251705	-10.6931	0.913203	1.74708e-13	2.27935e-12	0	3.69247
Npal2	-10.6849	0.897345	4.00723e-08	2.64049e-07	0	3.67476
art3	-10.6794	0.90473	4.96256e-12	5.50569e-11	0	3.65077
Aldob	-10.6738	0.88532	3.80454e-07	2.16746e-06	0	3.64615
Lax1	-10.6719	3.19404	2.47266e-24	8.83872e-23	0.00723636	18.2184
Rassf4	-10.6676	5.54278	1.66289e-46	2.42985e-44	0.050033	93.0949
4933403G14Rik	-10.6608	0.879433	2.68127e-12	3.06906e-11	0	3.61307
F630028O10Rik	-10.6585	0.886255	1.166e-10	1.0847e-09	0	3.59754
Tnni3	-10.6578	0.87903	1.72829e-13	2.2568e-12	0	3.60232
Col1a1	-10.6572	9.27312	2.33936e-62	1.40151e-59	0.763291	1236.58
Thbs4	-10.6567	3.16766	1.11753e-15	1.84541e-14	0.00723636	17.8604
AK040640	-10.648	0.87458	1.22841e-11	1.30025e-10	0	3.57198
Lrrn1	-10.6417	0.869684	1.06757e-10	1.0006e-09	0	3.5557
Hrct1	-10.6373	3.15924	6.24281e-24	2.15939e-22	0.00723636	17.7838
Traf3ip3	-10.6322	3.27907	4.36223e-23	1.40657e-21	0.01296	19.3295
Itgax	-10.6256	3.14785	4.5576e-24	1.59676e-22	0.00723636	17.6408
Tnnt3	-10.6234	6.27368	1.20127e-07	7.35868e-07	0.0946422	154.527
Fgr	-10.6227	3.14493	5.44289e-24	1.89144e-22	0.00723636	17.606
Kcng4	-10.6206	0.842002	3.64561e-13	4.58456e-12	0	3.51149
Aox3	-10.6183	0.843216	6.59473e-13	8.04664e-12	0	3.50113
Cd248	-10.6167	6.62467	3.90586e-54	9.83195e-52	0.116351	197.167
Igsf10	-10.6062	3.60519	3.9105e-26	1.5894e-24	0.0108521	24.2397
mKIAA4187	10.5956	0.807515	2.49137e-12	2.86374e-11	3.45557	0
Aplnr	-10.5944	5.21223	1.05904e-41	1.19261e-39	0.04621	74.0056
RIE2	10.5898	0.805629	3.0372e-13	3.85179e-12	3.43723	0
Mst1r	-10.5881	4.58147	6.03522e-36	4.53095e-34	0.0367514	47.7658
Sgcd	-10.5859	0.812247	1.87194e-12	2.18442e-11	0	3.42227
Mme	-10.5848	3.99031	2.47805e-25	9.52887e-24	0.0194868	31.6708
Rgl3	-10.5763	3.97903	7.69314e-30	3.95959e-28	0.0194868	31.4459
Myo1f	-10.5734	3.93117	4.68886e-30	2.4555e-28	0.0144728	30.4137
Tfpi2	-10.5693	0.794176	3.762e-13	4.71905e-12	0	3.38545
Tril	-10.5661	5.17326	3.82122e-39	3.51118e-37	0.0418733	72.0572
AK087736	-10.566	0.789548	3.06834e-13	3.88799e-12	0	3.3796
Bpil1	-10.561	0.788604	5.07764e-12	5.62503e-11	0	3.36312
Mageh1	-10.5607	0.782627	1.04539e-12	1.24859e-11	0	3.36965
Ttpa	-10.559	0.783067	3.06812e-13	3.88799e-12	0	3.36261
AF479018	-10.5551	0.779443	3.20203e-13	4.04713e-12	0	3.35344
Hpn	-10.552	3.07365	5.18153e-23	1.66181e-21	0.00723636	16.7566
Myh11	-10.5507	4.4686	1.30311e-36	1.02185e-34	0.0267342	44.1721
AK079929	-10.5465	0.769565	5.72419e-13	7.03315e-12	0	3.33568
Pira1	-10.5454	0.772712	2.46451e-12	2.83504e-11	0	3.32743
AK015956	-10.5436	0.770967	2.49951e-12	2.87089e-11	0	3.3233
Zcchc5	-10.5363	0.761647	4.24271e-13	5.29323e-12	0	3.30926
Myadml2	-10.5343	3.1821	6.12579e-09	4.51187e-08	0.0122504	18.0266
Kcnb1	-10.5283	3.93266	3.28443e-26	1.33857e-24	0.0194868	30.4545
Ces2e	-10.5263	0.751857	4.7638e-13	5.904e-12	0	3.28616
Fam189a2	-10.5219	3.04245	3.87224e-21	1.06611e-19	0.00723636	16.3791
Ctnnd2	-10.5145	0.73502	2.38058e-11	2.45305e-10	0	3.26516
Slamf1	-10.5078	0.732361	5.49522e-13	6.76847e-12	0	3.24628
Kcna6	-10.5059	0.731978	5.58608e-13	6.87191e-12	0	3.24008
Slc6a19	-10.5058	0.730979	5.05548e-13	6.24997e-12	0	3.2412
Pld4	-10.5009	6.47425	1.15133e-54	3.0793e-52	0.124157	177.617
AK018014	-10.4991	0.718991	1.02708e-10	9.6506e-10	0	3.23108
Ltf	-10.4951	4.41243	9.95924e-35	6.98663e-33	0.0267232	42.4761
Iffo1	-10.4937	5.11176	2.23342e-39	2.11716e-37	0.0462099	69.0406
C1qtnf7	-10.4933	0.72255	8.13008e-12	8.77609e-11	0	3.20872
AK194371	10.4923	0.712321	6.36204e-13	7.77539e-12	3.20894	0
Kbtbd12	-10.4899	0.726559	4.96534e-07	2.77701e-06	0	3.20043
Art1	-10.482	3.91462	1.51864e-07	9.16967e-07	0.0194868	30.0262
Gas7	-10.4793	6.0698	6.53077e-50	1.20759e-47	0.0927317	134.164
Bves	-10.478	0.716924	4.94603e-05	0.000197967	0	3.17564
Cma1	-10.4773	2.99717	3.44394e-20	8.74266e-19	0.00723636	15.8684
Cnn1	-10.4754	4.83781	2.76692e-37	2.24009e-35	0.0439877	57.0789
Kcnq5	-10.4696	0.699303	7.96346e-12	8.61175e-11	0	3.15634
AK045814	-10.469	0.708483	0.00016592	0.000602879	0	3.15627
Cd53	-10.4681	4.75944	1.10032e-36	8.71959e-35	0.0339595	54.0469
Slco3a1	-10.465	4.82525	3.35174e-39	3.1084e-37	0.0439999	56.5794
Cyp2g1	-10.4593	0.699127	0.000167304	0.000607393	0	3.13517
Rasal3	-10.455	6.21963	7.05996e-41	7.44652e-39	0.109684	148.873
Cabc1	-10.4522	0.668595	6.65541e-08	4.23726e-07	0	3.12785
Msx1	-10.4493	3.03476	9.79203e-20	2.38666e-18	0.0122504	16.311
AK041600	-10.4463	0.673151	7.70672e-13	9.33879e-12	0	3.10956
Wasf3	-10.4442	0.669095	1.6931e-12	1.985e-11	0	3.10782
Adora3	-10.4398	0.667978	1.17676e-12	1.39438e-11	0	3.09402
Cdh13	-10.4341	4.44711	2.55938e-33	1.67394e-31	0.024104	43.5137
Fam167b	-10.4317	0.657326	1.3128e-12	1.55066e-11	0	3.0803
J00476	-10.4317	0.656957	1.64738e-12	1.93367e-11	0	3.08063
Cyp8b1	-10.4306	0.651178	3.48372e-10	3.02215e-09	0	3.08149
1700049E17Rik1	10.4251	2.90687	2.87608e-22	8.70233e-21	14.9333	0.0074825
Kprp	-10.4241	0.661882	1.26661e-07	7.73048e-07	0	3.05723
TCRB	-10.4239	0.650275	1.15523e-12	1.36995e-11	7.19878e-07	3.06409
Hide1	-10.4214	0.645477	6.22072e-12	6.81571e-11	0	3.06017
Kcna2	-10.4166	0.645834	1.8238e-12	2.13157e-11	0	3.04404
Lcp2	-10.4165	3.79381	8.06331e-28	3.59965e-26	0.0147209	27.6493
U89428	-10.4145	0.635322	4.31892e-10	3.69849e-09	0	3.04743
Semcap3	-10.4139	0.627067	0.000263029	0.00092271	0	3.04331
AK009724	-10.4041	0.642896	2.81427e-07	1.63375e-06	0	3.01506
AK088959	10.4023	0.625487	1.62888e-12	1.91271e-11	3.01332	0
AK050859	-10.4001	0.622731	7.01743e-11	6.76342e-10	0	3.01671
St8sia5	-10.399	0.63811	3.46417e-07	1.9864e-06	0	3.00452
Tnfsf14	-10.3969	0.619189	1.11433e-10	1.04084e-09	0	3.01011
Mpz	-10.3934	6.12865	1.22033e-46	1.83693e-44	0.10467	139.743
Kcne1l	-10.3929	0.6222	1.49645e-12	1.76204e-11	0	2.99505
Frem2	-10.3923	0.622893	3.92957e-12	4.40532e-11	0	2.99238
Gpr37l1	-10.3915	0.622029	3.38008e-12	3.82077e-11	0	2.99101
Mb	-10.3912	5.65916	1.23788e-08	8.75784e-08	0.0729331	100.878
Raet1c	10.3895	0.610371	1.07003e-12	1.27649e-11	2.98966	0
Hgf	-10.3836	0.614458	4.26836e-12	4.76374e-11	0	2.97435
Sparcl1	-10.3834	6.23161	4.80069e-49	8.40962e-47	0.111907	150.089
Hs3st3a1	-10.3822	0.604079	3.00231e-10	2.62659e-09	0	2.97992
2810432L12Rik	-10.3803	2.90132	1.82625e-20	4.76113e-19	0.00723636	14.8443
Eps8R1	-10.3777	0.600389	1.24931e-10	1.15539e-09	0	2.97036
Gpr133	-10.3746	4.9627	3.66232e-43	4.45955e-41	0.0411959	62.2455
Clec4b1	-10.3709	0.602952	1.05501e-11	1.12385e-10	0	2.94745
AK039780	-10.3679	0.607817	2.90177e-07	1.68128e-06	0	2.94024
Srgn	-10.3654	2.94715	9.95283e-22	2.89173e-20	0.0122504	15.3314
Faim3	-10.3653	5.39462	4.26414e-39	3.89428e-37	0.0556686	84.0121
Asb10	-10.3637	2.8571	2.15681e-09	1.6904e-08	0.00723636	14.3714
Arhgef10	-10.359	5.24517	1.5841e-46	2.32606e-44	0.0584604	75.7199
AK138412	-10.3513	0.581601	1.84595e-12	2.15493e-11	0	2.91002
Osm	-10.3462	0.573833	2.24717e-12	2.59699e-11	0	2.90312
Lrrc3b	-10.3379	0.565555	2.68311e-12	3.07e-11	0	2.88679
TCRA	-10.335	0.564123	1.51136e-12	1.77819e-11	0	2.87926
Hpd	-10.3325	0.551215	8.24677e-08	5.18104e-07	0	2.87907
Mybpc2	-10.3314	7.08557	1.31132e-07	7.97899e-07	0.209341	271.317
Tgfbi	-10.331	6.15734	3.8251e-55	1.08095e-52	0.106893	142.561
Cox6b2	-10.329	0.557173	2.17402e-12	2.51925e-11	0	2.86844
Kcng2	-10.3282	0.552338	9.81526e-11	9.25161e-10	0	2.87002
Irak3	-10.3269	2.90967	3.02129e-21	8.45525e-20	0.0122504	14.9332
Ffar2	-10.3236	3.82107	1.81402e-28	8.43772e-27	0.0208126	28.1682
Tnxb	-10.3221	8.34688	1.1317e-54	3.05406e-52	0.50831	650.583
Plcb2	-10.3201	4.27752	1.28918e-32	8.04529e-31	0.0317372	38.6812
Myf6	-10.3186	0.563072	0.000190106	0.000684368	0	2.84335
Pcdhga10	-10.3159	0.548249	4.64296e-12	5.16641e-11	0	2.83813
A430084P05Rik	-10.3127	0.543908	2.2236e-12	2.57372e-11	0	2.83317
Sorcs1	-10.3091	0.542374	9.37351e-12	1.00351e-10	0	2.82406
Gm14548	-10.3088	0.543734	5.28806e-11	5.20723e-10	0	2.82229
Gpr18	-10.3048	4.22246	3.17144e-33	2.06523e-31	0.0267232	37.233
Lalba	-10.3042	0.541239	5.38206e-10	4.55938e-09	0	2.81259
Klk1	-10.3036	0.531067	6.93195e-12	7.54881e-11	0	2.81972
Hoxb7	-10.2975	0.523441	3.6473e-11	3.674e-10	0	2.80918
Rbms3	-10.2855	4.16234	2.05833e-31	1.18344e-29	0.0217091	35.7037
Klhl14	-10.2852	0.510519	1.02293e-10	9.61648e-10	0	2.78569
Fzd10	-10.2849	2.87352	2.51499e-18	5.43947e-17	0.0122504	14.5791
Trim55	-10.2777	0.522732	1.70015e-05	7.35849e-05	0	2.76274
Gm16809	-10.2761	0.506514	2.46831e-12	2.83831e-11	0	2.76407
Gpx3	-10.2748	8.71403	7.87407e-55	2.14425e-52	0.684261	839.113
AI506816	10.2634	4.1534	2.6482e-32	1.62222e-30	35.4922	0.0285642
Krt23	-10.2605	0.492474	2.62164e-12	3.0031e-11	0	2.73316
Sgca	-10.2588	5.10587	9.56042e-09	6.8611e-08	0.0534463	68.7042
Grb10	-10.2573	5.6541	2.91253e-46	4.23518e-44	0.0751554	100.548
Art3	-10.2554	3.66224	6.91966e-24	2.37978e-22	0.0194868	25.208
BC100303	-10.2512	0.479827	1.12507e-11	1.19552e-10	0	2.71937
Rarres1	-10.2481	0.477358	7.57611e-12	8.2166e-11	0	2.713
Scamp5	-10.2463	4.1225	9.94715e-31	5.42745e-29	0.0217091	34.7283
Art4	-10.2462	0.47882	3.14854e-12	3.56847e-11	0	2.70597
St6galnac5	-10.2432	2.76398	4.72107e-20	1.18047e-18	0.00723658	13.5077
Gkn3	-10.2426	0.477834	1.5915e-11	1.66457e-10	0	2.69652
MAIR-IIa	-10.2426	0.483114	4.89925e-09	3.65978e-08	0	2.6945
Hoxc5	-10.2411	2.7639	4.88216e-21	1.32829e-19	0.00723636	13.4929
Adamtsl2	-10.2329	0.468021	1.17243e-11	1.24276e-10	0	2.67883
Entpd1	-10.2307	4.10594	2.04461e-28	9.45158e-27	0.021751	34.3262
Col1a2	-10.227	9.33599	4.14783e-59	1.91151e-56	1.06789	1291.39
Lox	-10.2255	5.49207	1.27523e-40	1.31723e-38	0.0729331	89.8737
Elane	-10.2214	0.450528	1.77403e-11	1.84517e-10	0	2.66401
Ifitm1	-10.2186	4.09752	5.23935e-31	2.90101e-29	0.0217446	34.1323
Loxl1	-10.215	8.13794	1.08201e-50	2.14647e-48	0.47435	562.825
Pdcd1	-10.2125	0.443019	8.13411e-12	8.77728e-11	0	2.6467
Asb18	-10.2125	0.460727	0.00021443	0.000765035	0	2.64132
Cd37	-10.2106	7.23942	1.17147e-45	1.63216e-43	0.255133	301.891
AK163103	-10.2071	0.441325	5.12798e-12	5.6766e-11	0	2.63298
Slc22a3	-10.2038	4.56898	1.75761e-34	1.22726e-32	0.0439877	47.3534
Khdrbs3	-10.2015	0.434184	4.19284e-12	4.68469e-11	0	2.62448
Fhl1	-10.2008	7.26822	1.56907e-16	2.81446e-15	0.255664	307.939
Gys2	-10.1961	2.7818	6.36068e-20	1.56689e-18	0.0122504	13.6555
B3galnt1	-10.1959	2.78073	2.86852e-20	7.32537e-19	0.0122504	13.6473
Ptprcap	-10.1958	6.40971	6.00793e-29	2.88873e-27	0.133046	169.846
BC034902	-10.1924	2.70985	1.62982e-16	2.91471e-15	0.00723636	12.9794
Dpp4	-10.1917	4.48396	3.42551e-32	2.08559e-30	0.0340003	44.6298
Cd300lh	-10.1899	2.81215	9.2622e-12	9.91953e-11	0.0122504	13.9257
Mup3	-10.1891	0.418637	3.08333e-11	3.1394e-10	0	2.60522
Kcne3	-10.1887	0.427671	1.69261e-10	1.5376e-09	0	2.59625
Scnn1b	-10.1858	2.70904	5.05691e-21	1.37334e-19	0.00723637	12.9891
Pygm	-10.1845	8.44546	6.08437e-09	4.48247e-08	0.595597	696.503
Pax5	-10.1819	3.59153	9.89789e-19	2.22591e-17	0.0194868	24.0316
Epas1	-10.1797	6.91708	2.17036e-50	4.1675e-48	0.194249	241.432
S1pr3	-10.1659	4.08392	3.76966e-32	2.28583e-30	0.0267232	33.8098
AK034221	-10.1654	0.390987	3.23286e-09	2.47357e-08	0	2.56457
Gm10136	10.1638	6.72549	5.52884e-48	9.0998e-46	211.41	0.172995
Notch3	-10.1633	7.45974	4.29417e-51	8.75046e-49	0.301191	351.703
Slc6a7	-10.161	0.399521	5.43457e-11	5.33746e-10	0	2.54759
Pcdh20	-10.1605	0.395096	5.80735e-12	6.38616e-11	0	2.5502
Pde9a	-10.16	2.74443	2.36103e-20	6.07079e-19	0.0122504	13.3094
Pik3r6	-10.1568	3.5126	1.00235e-25	3.96112e-24	0.0144727	22.7295
Ugt1a6	-10.1558	0.397154	7.69031e-10	6.37595e-09	0	2.53724
Auts2	-10.1547	3.3003	1.76294e-23	5.86112e-22	0.0122365	19.6172
Cd226	-10.1534	0.390935	2.22994e-11	2.30178e-10	0	2.53487
Ankrd2	-10.1484	0.397438	5.99898e-06	2.81115e-05	0	2.52499
AK214332	10.1441	0.370122	6.65717e-12	7.26468e-11	2.52222	0
Abcc8	-10.1416	2.7273	6.61906e-20	1.6292e-18	0.0122504	13.1474
Wif1	-10.1376	0.369034	3.04648e-11	3.10294e-10	0	2.51371
Bank1	-10.1363	2.67111	2.93395e-20	7.47971e-19	0.00731227	12.6446
Fam101a	-10.1341	0.364694	6.49501e-11	6.29842e-10	0	2.50824
Crct1	-10.1295	0.377174	3.67966e-07	2.10111e-06	0	2.49129
Asgr2	-10.123	0.360028	1.09314e-11	1.16365e-10	0	2.48324
Ly6k	-10.1203	0.356766	8.88365e-12	9.54825e-11	0	2.47914
Prom1	-10.1199	2.64096	2.25383e-18	4.89583e-17	0.00723636	12.3747
AK040873	-10.1185	0.355177	9.18689e-12	9.84591e-11	0	2.47609
Slc8a2	-10.1176	0.349224	4.47236e-11	4.44196e-10	0	2.47935
Cyp27a1	-10.1137	3.51933	6.36331e-26	2.5483e-24	0.0194868	22.8296
AK180697	10.1131	0.342234	9.80938e-12	1.04868e-10	2.46589	0
AK020768	-10.1099	0.344273	1.04975e-11	1.11905e-10	0	2.46388
Clstn3	-10.1089	4.69513	1.38573e-37	1.13414e-35	0.0411959	51.6813
C2cd4d	-10.1072	0.33591	8.18375e-10	6.76633e-09	0	2.46296
Slc18a2	-10.1065	0.34654	4.12519e-11	4.12725e-10	7.98365e-07	2.45445
Plbd1	-10.0997	4.71852	9.52798e-39	8.36981e-37	0.04621	52.5248
AK083203	-10.0983	0.330253	5.85229e-11	5.72332e-10	0	2.44636
Ampd1	-10.0961	5.80518	1.41589e-08	9.9421e-08	0.0996563	111.616
Mycn	-10.0956	0.326885	1.09437e-10	1.02347e-09	0	2.44227
Slc29a4	-10.0831	0.314813	1.17679e-10	1.09367e-09	0	2.42119
Cd209c	-10.083	0.326852	1.26343e-09	1.02121e-08	0	2.41203
AB013468	-10.082	0.307653	3.61303e-08	2.39231e-07	0	2.42068
Degs2	-10.0714	3.53931	2.05763e-26	8.52509e-25	0.0202305	23.154
Pf4	-10.0706	3.42639	3.96977e-25	1.51099e-23	0.0144727	21.4052
Tnfsf12	-10.0683	4.61689	1.84427e-34	1.28477e-32	0.0361818	48.9656
Gm6484	-10.068	5.43473	8.21069e-41	8.62987e-39	0.0701414	86.3668
Cyp4f39	-10.0664	0.309818	5.42979e-10	4.59721e-09	0	2.38472
Cd5l	-10.0657	0.302186	1.32019e-11	1.39297e-10	0	2.38864
AK080070	-10.0628	0.304014	7.65171e-11	7.34873e-10	0	2.37991
Gm13298	-10.0617	0.304214	2.15643e-10	1.92997e-09	0	2.37737
Il9r	-10.0591	2.64589	4.42157e-19	1.0252e-17	0.0122504	12.4333
Lzts1	-10.0585	0.295581	1.3225e-11	1.39442e-10	0	2.37641
Fam25c	-10.0542	0.292416	1.55137e-11	1.62431e-10	0	2.36827
Lrrc36	-10.051	0.293652	1.94493e-10	1.7543e-09	0	2.35987
Slc6a12	-10.05	0.290555	4.23723e-11	4.22384e-10	0	2.35948
Prf1	-10.0442	2.6476	1.96794e-18	4.3029e-17	0.0124058	12.4507
Mmp2	-10.0423	8.70848	7.11053e-59	3.17904e-56	0.790014	835.782
Rtn4rl2	-10.0411	3.45114	1.55413e-18	3.44335e-17	0.0194868	21.7952
Frem1	-10.0395	3.40389	5.1372e-25	1.93566e-23	0.0145726	21.0747
Tox3	-10.0371	0.273439	2.10775e-11	2.18017e-10	0	2.34271
F12	-10.0366	0.260167	1.07557e-06	5.70746e-06	0	2.3452
Tpsg1	-10.03	0.268058	1.61184e-11	1.68408e-10	0	2.32982
Cd69	-10.0219	0.26077	1.8092e-11	1.88045e-10	0	2.31611
Serpina3j	-10.02	0.273966	7.38941e-06	3.40067e-05	0	2.30947
Hmgcs2	-10.0138	3.93202	7.32285e-30	3.77549e-28	0.0267232	30.4213
Cd244	-10.0082	0.25051	6.80654e-11	6.56861e-10	0	2.29181
Chst7	-10.0076	2.5253	6.39655e-17	1.20282e-15	0.00723636	11.4427
2210023G05Rik	-10.0063	0.244564	2.11938e-11	2.19068e-10	0	2.29242
A730069N07Rik	-9.99906	0.241924	9.04306e-11	8.57774e-10	0	2.27707
Pir	-9.99859	0.239901	3.70439e-11	3.72616e-10	0	2.2775
Oit1	-9.99744	0.234285	3.84795e-11	3.86149e-10	0	2.27981
Thrb	-9.99497	2.61317	1.94281e-17	3.85665e-16	0.0125142	12.1316
AK078239	-9.98982	0.23274	8.01045e-11	7.67604e-10	0	2.26268
AK178429	9.98116	0.208993	3.59378e-11	3.62464e-10	2.25465	0
Cmya5	-9.97911	4.90336	1.41309e-10	1.29844e-09	0.0584604	59.6803
2310050C09Rik	-9.97652	0.232194	7.85871e-06	3.59841e-05	0	2.24065
mKIAA1110	-9.97526	0.213018	4.26972e-11	4.2548e-10	0	2.24484
Clec4g	-9.97217	0.211904	2.76766e-11	2.83094e-10	0	2.23834
Rya3	-9.97069	0.212365	3.64763e-11	3.674e-10	0	2.2343
Ccl27a	-9.96988	2.55754	4.75407e-19	1.09883e-17	0.0122504	11.6771
AK009351	-9.96824	0.225371	4.52796e-05	0.000182452	0	2.22842
Sema4a	-9.96628	6.32868	3.1402e-51	6.53227e-49	0.163131	160.513
Il12a	-9.96588	0.203687	5.02778e-11	4.96234e-10	0	2.23047
S60130	9.96058	0.191067	3.19446e-11	3.24483e-10	2.22082	0
6330403A02Rik	-9.95805	0.195886	6.01664e-11	5.86109e-10	0	2.21856
Mrvi1	-9.95524	3.36172	4.65426e-25	1.75811e-23	0.0194868	20.4571
Igsf21	-9.95499	0.192095	9.52698e-11	9.00544e-10	0	2.21447
Cxcr4	-9.95418	5.07196	8.37699e-44	1.05434e-41	0.0707109	67.123
Cygb	-9.95368	5.77974	3.40087e-47	5.2784e-45	0.106893	109.698
Tbx3	-9.95349	4.81095	1.33948e-31	7.80628e-30	0.0534463	56.0215
Pnpla3	-9.95069	8.86951	2.20501e-56	7.33901e-54	0.935021	934.426
Hoxc10	-9.94932	2.46509	1.03437e-15	1.71659e-14	0.00723636	10.9747
Galnt6	-9.949	3.35682	5.64755e-22	1.66508e-20	0.0194868	20.4033
Mup12	-9.94722	2.46519	1.13519e-16	2.07599e-15	0.00723636	10.9729
Hmga1-rs1	9.94421	8.53923	1.77298e-48	2.98369e-46	743.214	0.761811
Cd40lg	-9.94206	0.183493	3.61449e-11	3.64307e-10	0	2.19142
Egflam	-9.94154	3.90304	1.51577e-28	7.12793e-27	0.0317372	29.8094
Dcaf12l1	-9.94014	0.176807	1.85005e-10	1.67174e-09	0	2.19235
H2-Ab1	-9.93586	9.9109	1.297e-54	3.43821e-52	1.96196	1923.3
Gm10584	-9.9326	0.165073	5.32688e-09	3.96144e-08	0	2.18251
mKIAA4222	-9.93	0.170815	3.99322e-11	3.99922e-10	0	2.17408
Pik3cg	-9.92531	3.93397	1.34247e-27	5.9225e-26	0.0367513	30.4507
Hck	-9.92063	3.38075	1.56622e-23	5.23619e-22	0.0245009	20.7318
AK028012	-9.91394	0.161911	7.24163e-10	6.03066e-09	0	2.14528
Hnmt	-9.91392	0.162699	1.34396e-09	1.08222e-08	0	2.14496
Mup11	-9.90989	0.151754	4.61588e-11	4.57389e-10	0	2.14363
Apoc4	-9.90815	0.13152	0.000103183	0.000389526	0	2.14421
Gria1	-9.90738	0.150191	4.8578e-11	4.8009e-10	0	2.13912
Tmem108	-9.90402	0.140163	7.13392e-10	5.94592e-09	0	2.13893
AK034149	-9.90394	0.163025	4.39315e-07	2.47595e-06	6.90124e-06	2.13465
3632451O06Rik	-9.89876	0.146414	4.18023e-10	3.5869e-09	0	2.12316
Wtip	-9.89693	3.2495	2.08201e-22	6.37772e-21	0.0144727	18.9352
Maneal	-9.89542	0.136436	5.96031e-11	5.81947e-10	0	2.12337
Cyp2d26	-9.8914	0.117456	4.84236e-06	2.30279e-05	0	2.12061
Gm13907	-9.88622	0.12815	5.34217e-11	5.2536e-10	0	2.10934
Ankrd1	9.88391	6.5131	2.48061e-45	3.37757e-43	182.426	0.181273
Aldh1a1	-9.88101	3.29406	1.07294e-17	2.19836e-16	0.0194868	19.4973
Treml4	-9.87797	0.119523	6.64738e-11	6.43367e-10	0	2.09787
Cd300c	-9.87628	0.119358	5.35908e-11	5.26677e-10	0	2.09415
E430016F16Rik	-9.8708	0.117188	1.22697e-10	1.13665e-09	0	2.08367
Asb5	-9.86759	3.63209	4.8327e-06	2.29856e-05	0.0217091	24.6596
Nos3	-9.86482	5.96432	6.0942e-46	8.69294e-44	0.123752	124.678
Ctla4	-9.86272	0.106	5.86204e-11	5.73099e-10	0	2.07476
Adamts19	-9.8598	0.0989179	3.12153e-10	2.72372e-09	0	2.07366
Tro	-9.85429	0.102353	2.34392e-10	2.08221e-09	0	2.05921
Prtn3	-9.85423	2.37372	8.18099e-17	1.52496e-15	0.00723636	10.2927
BC018465	-9.84211	0.0832913	1.55336e-10	1.42079e-09	0	2.04751
Gfi1b	-9.84129	0.0836819	9.66069e-11	9.11165e-10	0	2.04549
4833422F24Rik	-9.83807	0.0803876	1.08053e-10	1.01211e-09	0	2.04106
Lmcd1	-9.83561	2.35505	3.49359e-15	5.44488e-14	0.00723636	10.1266
Ccr8	-9.83346	0.0738704	2.84652e-10	2.50345e-09	0	2.03593
Fbp1	-9.83294	0.0651259	1.00899e-07	6.25892e-07	0	2.03717
Shag1	-9.83075	3.53552	5.19448e-09	3.8697e-08	0.0240842	23.1216
Il22ra2	-9.83063	0.0732714	1.06341e-10	9.97009e-10	0	2.03052
Klhdc7a	-9.82837	6.73781	2.54406e-50	4.79292e-48	0.228258	213.158
4933406I18Rik	-9.82545	0.0578735	1.01842e-07	6.30953e-07	0	2.02663
Ttc12	-9.82465	0.0734511	2.34349e-10	2.08221e-09	0	2.01746
Klhl34	-9.823	0.084064	2.98288e-06	1.47178e-05	0	2.01345
AK200207	-9.81648	0.0585097	1.80349e-10	1.63262e-09	0	2.01146
Axin2	-9.81286	3.73154	1.53529e-27	6.74333e-26	0.0267232	26.4638
Obsl1	-9.80563	4.6963	1.64908e-36	1.28977e-34	0.0584604	51.7194
Pdlim4	-9.80471	4.83101	6.85105e-33	4.37576e-31	0.0556686	56.8031
Tusc5	-9.79857	5.36148	8.51348e-47	1.30113e-44	0.0874059	82.061
Bche	-9.79454	3.20581	1.32315e-19	3.18866e-18	0.0194868	18.338
Serpina10	-9.79232	0.0385767	9.52704e-11	9.00544e-10	0	1.97547
1810011H11Rik	-9.78408	0.0326931	1.42799e-10	1.31092e-09	0	1.96258
AK205332	9.78242	0.0183069	1.0451e-10	9.80452e-10	1.96245	0
Htr7	-9.78037	0.0229912	3.14276e-10	2.74145e-09	0	1.96214
Myl3	-9.77868	0.0368816	5.7367e-08	3.69396e-07	0	1.95184
mKIAA0878	9.77727	3.22012	3.31745e-21	9.22695e-20	18.539	0.0166011
Mir142	-9.77584	0.0131031	1.01683e-08	7.27646e-08	0	1.95798
Cd207	-9.76863	0.0180145	1.63667e-10	1.4888e-09	0	1.9415
Cyp4a10	-9.76803	0.0123846	1.91155e-10	1.72628e-09	0	1.94461
Lce1b	-9.76599	0.0237645	2.85818e-08	1.91837e-07	0	1.93474
Vstm2b	-9.76483	0.00812547	3.14667e-10	2.74406e-09	0	1.94106
Cpxm1	-9.76426	5.59139	1.35111e-50	2.64526e-48	0.106893	96.2417
Emb	-9.76238	3.63139	4.43904e-24	1.55704e-22	0.0217091	24.6927
Chst13	-9.75675	-0.00240391	1.55663e-09	1.24343e-08	0	1.9315
Zfp618	-9.7567	0.00184695	1.73016e-10	1.56861e-09	0	1.92912
Lce1a2	-9.74778	0.0079035	9.93731e-08	6.16937e-07	0	1.91031
Rims4	-9.74443	-0.0171206	1.06627e-08	7.61203e-08	0	1.91582
Fmo2	-9.74119	2.34341	2.00976e-15	3.23148e-14	0.0122504	10.0405
Gfpt2	-9.74059	4.97866	1.21656e-36	9.58999e-35	0.0679191	62.9015
Bmp3	-9.73806	3.16624	1.31709e-21	3.8009e-20	0.0153802	17.8683
Ltb	-9.73458	6.46372	1.85863e-33	1.22903e-31	0.201535	176.262
Hamp2	-9.73433	-0.00948929	3.94954e-09	2.98306e-08	0	1.89311
Klf14	-9.73242	-0.021512	2.07171e-10	1.86193e-09	0	1.89688
1810033B17Rik	-9.72823	-0.0198162	3.14844e-10	2.74481e-09	0	1.88711
M6B	-9.7282	-0.0152704	4.40915e-09	3.31018e-08	0	1.88505
AK021127	-9.72633	-0.0300784	6.86496e-10	5.73133e-09	0	1.89051
AI504432	-9.72611	-0.020795	5.41279e-10	4.58411e-09	0	1.88372
Pdk4	-9.72199	5.25751	4.93288e-32	2.96121e-30	0.0885911	76.32
Ldlrad1	-9.72012	-0.0321616	1.56767e-10	1.43126e-09	0	1.87989
Tat	-9.71885	-0.0530851	0.000129237	0.000479	0	1.88069
1700019D03Rik	-9.71869	-0.031743	1.52523e-10	1.39634e-09	0	1.87664
Peg3	-9.71833	4.6492	4.43184e-31	2.463e-29	0.0634744	50.0301
Trim17	-9.71173	-0.0472037	4.35768e-09	3.27482e-08	0	1.87262
Lgi4	-9.71084	3.62991	8.97873e-27	3.78281e-25	0.0267232	24.6544
EG434510	-9.70846	-0.03966	2.39672e-10	2.12785e-09	0	1.86193
Hes5	-9.70554	-0.056412	3.85274e-08	2.54373e-07	0	1.86513
etoile	-9.70074	-0.0422961	3.03363e-09	2.32887e-08	0	1.84959
F7	-9.69606	-0.0542266	1.59469e-10	1.45415e-09	0	1.84794
6030429G01Rik	-9.69343	3.04526	7.01992e-21	1.88594e-19	0.0144727	16.425
Ano5	-9.69275	2.15483	0.000105821	0.000398425	0.00723636	8.78446
Kdr	-9.69069	5.30525	2.29633e-44	2.97778e-42	0.0976709	78.8968
Sfrp5	-9.6891	3.98051	2.11722e-29	1.04829e-27	0.0339595	31.4611
D630042P16Rik	-9.68375	-0.0639528	2.28856e-10	2.03726e-09	0	1.83063
Sgo1	9.68283	-0.0760114	1.8358e-10	1.65987e-09	1.82983	0
AK172315	-9.68016	-0.0836103	2.57512e-07	1.50513e-06	0	1.83268
Colec11	-9.67471	-0.075137	1.81415e-10	1.64128e-09	0	1.82107
Npl	-9.67356	-0.0716257	5.31825e-10	4.51042e-09	0	1.81638
Meg3	-9.67226	7.59532	3.00977e-56	9.90744e-54	0.468758	386.22
Ntn5	-9.66322	-0.0939733	5.21496e-09	3.88206e-08	0	1.81074
1300002K09Rik	-9.65551	-0.100766	3.81732e-09	2.89195e-08	0	1.80091
Bcl2a1d	-9.65015	-0.0953091	3.63506e-10	3.14433e-09	0	1.78783
Ednrb	-9.64743	3.11041	2.51809e-22	7.6656e-21	0.0157761	17.1717
Gimap7	-9.64516	-0.102053	2.36187e-10	2.09753e-09	0	1.783
Klhl13	-9.64465	3.05635	1.30376e-19	3.14446e-18	0.0194868	16.5239
Tmem28	-9.6422	-0.114363	6.42074e-09	4.71405e-08	0	1.78458
AK011408	-9.63587	-0.109388	3.5959e-10	3.11349e-09	0	1.77044
Podxl2	-9.62846	3.54868	6.08002e-26	2.44466e-24	0.0267401	23.2979
Apoa2	-9.6229	2.10039	1.04949e-06	5.58293e-06	0.00723636	8.52383
Psca	-9.62245	-0.126088	2.79908e-10	2.4639e-09	0	1.75679
Dpysl3	-9.62092	3.91231	1.19218e-28	5.65058e-27	0.0339595	30.0027
Jph1	-9.62047	2.94749	3.09482e-12	3.51157e-11	0.0144727	15.3061
Atp2b4	-9.61897	4.4783	6.6346e-34	4.51681e-32	0.0534464	44.44
Lgals12	-9.61883	5.57984	6.90343e-50	1.26866e-47	0.116386	95.4617
Fyb	-9.61264	4.46776	2.26186e-20	5.84591e-19	0.0534463	44.1451
BC071238	9.6114	0.520832	2.1769e-12	2.52162e-11	2.80906	0.0012724
Emid2	-9.6076	-0.140333	3.05869e-10	2.67278e-09	0	1.73876
Rab42-ps	-9.60438	-0.146251	7.08655e-10	5.90809e-09	0	1.73668
AK144724	9.60367	2.08924	7.95105e-18	1.64371e-16	8.43677	0.0074825
Ugt1a6a	-9.60288	3.84663	2.96713e-25	1.13513e-23	0.0289455	28.6537
Selenbp1	-9.60277	5.59386	3.28027e-47	5.11774e-45	0.11793	96.3901
Inpp5d	-9.60213	5.36247	5.4626e-43	6.57158e-41	0.109684	82.0979
Gata1	-9.60057	-0.145636	2.89797e-10	2.54496e-09	0	1.72926
Zfp940	9.59782	-0.148132	3.26277e-09	2.49455e-08	1.71951	0
Fosl1	9.59778	4.51212	1.75097e-32	1.08818e-30	45.5152	0.0620684
Bgn	-9.59493	7.33796	3.93542e-51	8.07435e-49	0.417849	323.07
AK213775	9.59255	-0.162915	3.27466e-10	2.84904e-09	1.71851	0
Rpl3l	-9.59135	3.85081	3.31954e-07	1.90675e-06	0.0339595	28.7069
Yipf7	-9.58622	2.30292	0.000107336	0.000403721	0.0122504	9.74222
AK185910	9.58575	-0.176617	5.93786e-10	5.00474e-09	1.71528	0
Adm2	-9.58385	-0.170337	7.31721e-09	5.32266e-08	0	1.71385
Aqp4	-9.58167	2.25469	8.73019e-07	4.70093e-06	0.0122504	9.41863
Cdkn2b	-9.57926	2.92118	1.21063e-16	2.20318e-15	0.0144727	15.0736
Plvap	-9.57878	7.71076	3.56764e-39	3.28827e-37	0.547283	418.375
Foxd3	-9.57573	-0.172301	5.09065e-10	4.32597e-09	0	1.70168
Acr	-9.57503	-0.166788	6.68352e-10	5.58919e-09	0	1.69666
Bmper	-9.56957	3.03503	2.82279e-21	7.92471e-20	0.0245009	16.289
Vpreb3	-9.56932	2.92049	6.92246e-20	1.69969e-18	0.0144727	15.0578
Ccl12	-9.56917	-0.175082	3.70949e-10	3.20593e-09	0	1.69152
Snta1	-9.56731	4.45973	1.10948e-33	7.46845e-32	0.0584604	43.8666
Tcrg-C	-9.56446	-0.178228	4.72022e-10	4.02603e-09	0	1.68508
Cdh22	-9.55702	-0.197322	1.64948e-08	1.14641e-07	0	1.68256
Pdgfrb	-9.55511	6.80359	1.7849e-53	4.24338e-51	0.296747	223.036
Msy2	-9.55437	-0.178141	7.00938e-08	4.44749e-07	0	1.66987
Ly86	-9.55097	3.02676	3.48259e-21	9.6683e-20	0.0159521	16.1961
TCRB13-3-3	-9.54979	-0.195251	4.13218e-10	3.54805e-09	0	1.67006
AK218399	9.54918	-0.207814	4.36815e-10	3.73958e-09	1.66971	0
Cebpe	-9.54831	-0.200539	1.22838e-09	9.95031e-09	0	1.67071
Itih3	-9.54013	-0.212857	1.19672e-08	8.47265e-08	0	1.66284
Npas2	-9.53931	3.00665	1.22697e-20	3.23253e-19	0.0245009	15.9745
BC027576	-9.5379	-0.201057	1.38066e-09	1.11027e-08	0	1.6528
Sell	-9.53772	4.63064	4.88247e-37	3.91055e-35	0.0656968	49.3959
Prima1	-9.53708	-0.205103	4.97257e-10	4.23404e-09	0	1.65378
Mylpf	-9.53636	7.11561	2.48296e-07	1.45438e-06	0.368541	276.874
Sntg2	-9.53529	-0.208272	4.39403e-10	3.76066e-09	0	1.65274
Ccr3	-9.53431	-0.199741	1.65277e-08	1.14843e-07	0	1.64707
Igfbp6	-9.53368	6.50831	6.92667e-46	9.83357e-44	0.248314	181.746
Fam55b	-9.5334	-0.207819	5.93754e-10	5.00474e-09	0	1.64903
Lce1c	-9.53193	-0.197905	2.06976e-07	1.22772e-06	0	1.64394
Prkd1	-9.52724	2.87978	3.24362e-20	8.25511e-19	0.0144727	14.6345
Kbtbd11	-9.52674	6.76926	2.00655e-35	1.49147e-33	0.291482	217.809
3110007F17Rik	-9.52643	-0.209172	5.88176e-09	4.34925e-08	0	1.63855
Ckmt1	-9.52371	2.0506	1.50954e-17	3.03071e-16	0.00723636	8.19546
Cd96	-9.52303	2.11822	1.57572e-16	2.8247e-15	0.0122504	8.58395
Ppp2r2c	-9.5225	-0.211883	1.07251e-08	7.65297e-08	0	1.6338
Mpo	-9.52228	-0.224776	1.10898e-09	9.04427e-09	0	1.64045
Cnfn	-9.52189	-0.206475	3.94009e-07	2.23829e-06	0	1.6325
Myh6	-9.52003	-0.219032	1.08419e-09	8.86216e-09	0	1.63287
Defb6	-9.51836	-0.202915	7.80949e-05	0.000301111	0	1.62982
Fhit	-9.51554	-0.222352	1.67553e-09	1.33379e-08	0	1.6273
Asb2	-9.50605	5.21796	1.24837e-26	5.22277e-25	0.0996563	74.2366
Cacna1i	-9.50504	3.84328	4.54157e-21	1.2424e-19	0.0389736	28.6055
Kcnj12	-9.50148	1.99948	1.01529e-07	6.29408e-07	0.00723636	7.87766
Cldn10	-9.50079	2.09471	7.26429e-17	1.35831e-15	0.0122504	8.4468
Hspa1a	-9.50055	4.74617	4.48985e-25	1.69815e-23	0.0620845	53.5491
Acvr1c	-9.49952	3.83309	6.06915e-27	2.58241e-25	0.0389736	28.3782
Kcng1	-9.49774	-0.252874	9.95224e-09	7.13034e-08	0	1.61456
Dusp15	-9.49564	2.0224	1.73976e-17	3.48127e-16	0.00723636	8.03957
Ism1	-9.49191	3.41101	7.37195e-23	2.33186e-21	0.0267232	21.1775
Armcx6	-9.4909	-0.249717	6.22079e-10	5.2241e-09	0	1.60192
Plekhb1	-9.48842	4.58209	8.66737e-35	6.13785e-33	0.0656968	47.7524
TCRB13-1-1	-9.48754	-0.254271	5.94406e-10	5.00856e-09	0	1.59909
Tnfsf11	-9.48566	-0.267214	4.45597e-08	2.91629e-07	0	1.60161
Ptgis	-9.4823	3.45151	6.16894e-23	1.96168e-21	0.0317372	21.7761
Ptprg	-9.47982	5.04212	1.31998e-40	1.35411e-38	0.0874059	65.7354
Sulf1	-9.47885	3.34815	2.08226e-22	6.37772e-21	0.0217091	20.2569
Pdcd1lg2	-9.47743	-0.260231	1.11164e-09	9.06096e-09	0	1.58554
Mical1	-9.47603	5.43048	7.8064e-42	8.89128e-40	0.119143	86.0624
4930503E14Rik	9.4702	-0.283208	6.82633e-10	5.70384e-09	1.58025	0
Mylk2	-9.46662	4.79042	1.28387e-06	6.74944e-06	0.0770393	55.1535
Tspyl5	-9.46581	-0.268694	3.40488e-09	2.59789e-08	0	1.57153
Chst15	-9.46324	3.77449	1.82955e-27	7.96571e-26	0.0344556	27.2525
Tshr	-9.46194	4.91147	4.45072e-40	4.40005e-38	0.0851836	60.0275
M13680	-9.46184	-0.273965	1.82997e-09	1.44673e-08	0	1.56788
Eid2	-9.45106	1.96233	7.01662e-12	7.63191e-11	0.00723636	7.73083
Nynrin	-9.45098	3.78395	1.44329e-27	6.35789e-26	0.0389736	27.4326
Bcl2a1b	-9.44903	-0.287816	1.19608e-09	9.70442e-09	0	1.55485
Pcp4l1	-9.44546	1.97082	2.1092e-15	3.38455e-14	0.00723636	7.74003
Ppp2r2b	-9.44298	-0.293633	1.19949e-09	9.72945e-09	0	1.54838
Fkbp10	-9.44274	5.17316	1.46678e-43	1.8156e-41	0.100739	71.9856
Mcoln2	-9.44221	1.96847	5.47362e-16	9.30547e-15	0.00723636	7.72975
Slitrk1	-9.44106	-0.29714	8.95313e-10	7.37802e-09	0	1.54733
Steap4	-9.43997	6.76552	5.80626e-45	7.79939e-43	0.311219	217.195
Clca5	-9.43958	-0.290406	1.96773e-08	1.35626e-07	0	1.54215
Zpbp	-9.43312	-0.316145	2.65691e-08	1.79373e-07	0	1.54416
E030010A14Rik	-9.43217	0.201564	5.72319e-11	5.60255e-10	0.00130155	2.21364
BC134356	-9.43212	3.72114	3.61123e-23	1.16945e-21	0.0339595	26.2482
AK142847	-9.42638	-0.318251	3.50589e-09	2.6702e-08	0	1.5357
Col6a2	-9.42011	8.41517	2.02158e-54	5.17576e-52	0.988758	681.664
Cacna2d1	-9.41841	3.62497	3.99658e-14	5.55277e-13	0.0289455	24.5391
Ucp1	-9.41409	7.69024	1.0183e-20	2.7114e-19	0.606313	412.356
Arhgap25	-9.40474	1.93118	1.05782e-16	1.94398e-15	0.00723636	7.54549
Hnf4a	-9.40466	-0.352942	4.85756e-06	2.30965e-05	0	1.51417
Slc10a6	-9.40028	1.92694	7.46026e-16	1.25476e-14	0.00723636	7.50801
Klrb1c	-9.39726	-0.336152	2.16616e-09	1.69684e-08	0	1.49942
Rasgrp2	-9.39312	6.19921	1.92918e-41	2.14031e-39	0.221591	146.663
Gpr183	-9.39307	3.26414	9.62422e-23	3.02195e-21	0.0217091	19.1092
Ugt1a1	-9.38889	-0.339925	1.26224e-08	8.91333e-08	0	1.48906
Tmem179	-9.38071	5.35755	4.22741e-43	5.10613e-41	0.124157	81.8031
Kcnk3	-9.3785	6.34643	1.34364e-46	2.00242e-44	0.237156	162.433
Gm5622	9.37792	-0.372091	1.30899e-09	1.05491e-08	1.48237	0
Upk2	-9.37603	2.78702	1.05568e-20	2.80345e-19	0.0194868	13.7087
Zfp640	9.37174	-0.375369	1.41434e-09	1.13613e-08	1.47441	0
Tpsab1	-9.37128	-0.362634	1.62994e-09	1.29854e-08	0	1.47356
Gm5148	9.36624	-0.365721	1.48963e-09	1.19405e-08	1.48205	2.58022e-05
Havcr1	-9.36201	-0.367124	6.92827e-09	5.0631e-08	0	1.46203
Pnpla5	-9.3577	-0.364923	1.40458e-07	8.51876e-07	0	1.4563
Wnt4	-9.35617	2.76747	3.01561e-20	7.68135e-19	0.0194868	13.525
Kcng3	-9.35534	-0.394083	2.05557e-07	1.22009e-06	0	1.46354
Armcx2	-9.35112	3.9346	4.54928e-28	2.06475e-26	0.0411959	30.465
Clec4a1	-9.34698	1.95357	1.84834e-14	2.65676e-13	0.0122504	7.6391
Muc16	-9.34578	-0.381721	1.05983e-08	7.56969e-08	0	1.44537
BC038474	-9.34196	-0.389473	2.56439e-09	1.99057e-08	0	1.44329
Oxtr	-9.34122	6.396	1.44615e-47	2.27998e-45	0.263779	168.092
mKIAA0866	-9.33946	-0.382183	1.54675e-07	9.32628e-07	0	1.43794
Dgat2	-9.33782	10.2441	1.16094e-53	2.87404e-51	3.74244	2421.66
Lor	-9.33715	1.86442	1.32901e-15	2.17188e-14	0.00723636	7.18561
Serpinb9c	9.33691	-0.41786	3.72972e-09	2.8306e-08	1.44425	0
Tnfsf8	-9.33384	-0.403468	2.45558e-09	1.91031e-08	0	1.43881
Ms4a3	-9.32888	-0.39892	7.30248e-09	5.31324e-08	0	1.42889
Mir126	-9.32796	-0.408607	2.23886e-09	1.75105e-08	0	1.43269
Lrfn2	-9.32376	-0.41156	1.96277e-09	1.54561e-08	0	1.42794
AK158619	-9.32296	-0.409109	2.08775e-09	1.64057e-08	0	1.42524
Mrgprg	-9.31854	2.6684	2.24907e-17	4.42937e-16	0.0144727	12.6064
1810046K07Rik	-9.30992	-0.43499	7.13897e-08	4.52684e-07	0	1.41799
Rbmxl2	-9.30888	-0.441085	8.27549e-07	4.47298e-06	0	1.41728
Prlr	-9.3073	6.60586	1.8642e-40	1.89295e-38	0.299658	194.408
Vnn3	-9.2994	1.90025	4.65313e-15	7.17736e-14	0.0122504	7.36448
AK045786	-9.29795	-0.431141	3.34379e-09	2.55388e-08	0	1.39976
Tlx3	9.29641	-0.449062	2.12825e-09	1.66977e-08	1.4002	0
Lpar5	-9.29598	3.21582	2.13305e-21	6.05644e-20	0.0267232	18.4859
Gm10394	-9.2932	-0.433643	6.13706e-09	4.51907e-08	0	1.39423
AK181631	9.28629	-0.469413	8.74181e-09	6.30079e-08	1.39566	0
Msx1as	-9.27717	-0.454558	2.31774e-09	1.80849e-08	0	1.38176
Klb	-9.2751	4.54398	1.63269e-35	1.2166e-33	0.0729331	46.5017
Bace2	-9.27476	2.62925	1.87333e-19	4.45362e-18	0.0144727	12.2845
Grip2	-9.2744	1.79823	4.86385e-13	6.0255e-12	0.00723636	6.85017
Il2rb	-9.27048	5.27161	1.4307e-40	1.46268e-38	0.129171	77.0565
Fbn1	-9.26741	7.07351	1.47453e-53	3.56205e-51	0.432585	268.867
BC049352	-9.26581	-0.458306	1.11633e-08	7.93539e-08	0	1.36743
Lce1a1	-9.26494	-0.454464	8.14483e-08	5.12129e-07	0	1.36545
Col14a1	-9.26435	5.85447	9.65436e-49	1.65255e-46	0.189854	115.445
Gm16460	-9.25982	-0.470052	2.74342e-09	2.11857e-08	0	1.36466
Tmeff2	-9.25959	4.04404	1.45857e-27	6.41578e-26	0.0434182	32.8716
Fgf2	-9.2571	1.77228	4.86647e-12	5.40309e-11	0.00723636	6.76686
Mmp27	-9.25679	-0.461627	1.08297e-07	6.68049e-07	0	1.35766
Fam105a	-9.25654	2.61213	1.06824e-19	2.59103e-18	0.0144727	12.134
Sykb	-9.25175	5.35262	2.49728e-44	3.21056e-42	0.123588	81.5197
Ttn	-9.2495	8.15623	3.89483e-07	2.21427e-06	0.933088	569.508
Htr5b	9.24847	3.86201	1.22988e-26	5.15261e-25	28.9708	0.0496459
Ccl3	-9.24754	-0.480149	3.4693e-09	2.64435e-08	0	1.35221
Cebpa	-9.24699	9.097	7.3198e-24	2.49732e-22	1.79547	1093.36
Fcer1g	-9.24655	4.93527	1.1649e-39	1.12563e-37	0.0946422	61.0144
Car11	-9.24418	2.59984	1.35389e-19	3.25748e-18	0.0144727	12.0284
AK020496	-9.24275	-0.484049	3.87807e-09	2.93575e-08	0	1.34739
Rhox4a	9.23936	2.2358	1.37959e-18	3.07026e-17	9.34667	0.0115538
Smoc2	-9.23743	4.81275	6.28613e-24	2.17187e-22	0.0796	56.0342
Slc43a3	-9.22904	5.76064	7.02308e-41	7.43379e-39	0.180204	108.16
AI324046	-9.22114	-0.512649	7.58294e-09	5.50526e-08	0	1.33156
Gzmb	-9.22072	-0.502899	7.41065e-09	5.38801e-08	0	1.32598
Tmem119	-9.21941	4.24521	8.80872e-29	4.19499e-27	0.0556686	37.8026
Ppfibp2	-9.21824	3.50919	1.08381e-23	3.65602e-22	0.0339595	22.6503
Gm8267	9.2163	-0.528112	3.69434e-09	2.80517e-08	1.32584	0
Rec8	-9.21434	-0.518154	5.94722e-09	4.38898e-08	0	1.32488
Mfng	-9.21142	6.4116	6.76554e-42	7.73518e-40	0.273899	169.917
Aff3	-9.21103	4.51258	2.78331e-30	1.48352e-28	0.0779472	45.5038
Serpina1c	-9.21026	1.88573	1.13487e-15	1.87301e-14	0.0082517	7.31306
Klrb1a	-9.20747	-0.514291	1.11864e-08	7.94799e-08	0	1.31336
Htra4	-9.20288	-0.526576	3.98463e-09	3.0073e-08	0	1.31318
Aspg	-9.20118	4.93892	2.70607e-39	2.54108e-37	0.10467	61.159
Rnf144a	-9.19966	5.16178	5.67378e-43	6.77124e-41	0.116511	71.4019
Zfp423	-9.19466	5.0688	1.09546e-40	1.14336e-38	0.116921	66.9337
AK048672	-9.1874	-0.536482	5.39628e-09	4.01006e-08	0	1.29659
Gm10790	-9.18528	-0.528631	1.69908e-07	1.01832e-06	0	1.29168
Lbx1	-9.18354	-0.520228	2.1878e-05	9.2998e-05	0	1.29038
Lrrc10b	-9.17854	-0.559548	9.98982e-08	6.19812e-07	0	1.29456
Cacna1h	-9.17769	1.70612	1.0007e-15	1.66348e-14	0.00723636	6.44388
Hmcn1	-9.17716	3.75837	1.93274e-24	6.98373e-23	0.0411959	26.9339
Asb15	-9.17566	1.90124	4.80294e-05	0.00019278	0.0124262	7.34423
Cyp1a1	-9.17092	-0.550457	8.97254e-09	6.45467e-08	0	1.28108
AK043564	-9.1694	-0.548199	2.91987e-08	1.95846e-07	0	1.2784
AK219036	-9.16253	-0.562821	4.8979e-09	3.65968e-08	0	1.27586
Setbp1	-9.1586	2.59064	8.18834e-20	2.0023e-18	0.019776	11.9452
C86695	-9.15807	-0.559405	2.59908e-08	1.75666e-07	0	1.26852
AK145464	-9.15605	-0.568367	5.27649e-09	3.92591e-08	0	1.26983
Elovl3	-9.15242	1.67249	9.36979e-11	8.8736e-10	0.00723636	6.26399
B230307C23Rik	9.15155	-0.586522	5.42832e-09	4.03187e-08	1.26583	0
Myoz3	-9.15106	3.42223	4.7839e-06	2.27644e-05	0.0320526	21.2926
Enpp3	-9.15005	1.67844	2.79883e-14	3.9528e-13	0.00723636	6.30214
Nudt16	-9.14748	3.1217	3.55076e-20	8.97578e-19	0.0317372	17.3066
Gm13308	-9.14512	-0.605527	5.96584e-05	0.000235326	0	1.26462
AK087181	-9.137	-0.591846	1.07583e-08	7.67482e-08	0	1.25584
Fam196b	-9.13216	-0.59057	5.90047e-09	4.35986e-08	0	1.24875
Tmprss13	-9.12593	3.47108	8.4902e-24	2.89004e-22	0.0392491	22.0633
Lair1	-9.12562	1.65505	1.08736e-14	1.61407e-13	0.00723636	6.20142
Tmem163	-9.12519	1.74144	1.5476e-11	1.62093e-10	0.0122504	6.61857
C2cd4a	-9.12429	-0.616533	1.06873e-06	5.67618e-06	0	1.24727
Xist	-9.12408	7.35485	9.2996e-44	1.16556e-41	0.577792	326.716
Fbln7	-9.11824	3.43182	2.74975e-23	9.02177e-22	0.0347122	21.4761
2310042E22Rik	-9.11664	-0.588589	1.60254e-06	8.27373e-06	0	1.23117
Adam23	-9.11491	4.38825	4.9094e-32	2.95304e-30	0.0658573	41.7386
Tcerg1l	-9.10986	-0.627032	3.09131e-07	1.78352e-06	0	1.2347
Adprhl1	-9.10984	-0.596562	7.98652e-07	4.33007e-06	0	1.22538
Lypd6	-9.10823	-0.603837	7.99258e-08	5.03295e-07	0	1.22467
Nt5c1a	-9.10269	-0.602249	1.27571e-06	6.70889e-06	0	1.21926
Hoxb5	-9.10111	1.62705	2.36084e-14	3.35638e-13	0.00723636	6.10264
Mir145	-9.09877	-0.616987	1.91915e-08	1.32522e-07	0	1.21784
Gpr4	-9.09767	4.26709	1.897e-28	8.81002e-27	0.0578909	38.3716
syt XV-a	-9.09756	-0.644829	3.84884e-06	1.86345e-05	0	1.22435
Cyp2a5	-9.09476	-0.654726	0.000120802	0.000450078	0	1.22104
AK210533	9.09108	6.4867	3.08318e-26	1.2617e-24	178.981	0.314742
Ptch2	-9.08994	4.67938	1.54747e-33	1.02782e-31	0.0924199	51.0833
AK138453	-9.08713	-0.638958	1.50312e-08	1.05102e-07	0	1.21313
Kcnf1	-9.08525	-0.633278	9.80111e-09	7.02542e-08	0	1.20795
AK086245	-9.0778	-0.63443	4.50097e-08	2.94317e-07	0	1.19949
Mrc1	-9.07229	3.65248	7.08456e-23	2.24569e-21	0.0411959	25.0173
Itih5	-9.07114	6.81317	3.34373e-45	4.53219e-43	0.404738	224.412
Myl9	-9.06285	4.598	5.98266e-35	4.2771e-33	0.0823918	48.272
Cd33	-9.06108	3.53104	2.7487e-21	7.72396e-20	0.0465868	22.982
AK021299	-9.06001	-0.664152	1.56341e-08	1.09089e-07	0	1.19035
Slc7a8	-9.05956	4.01016	1.43076e-25	5.57325e-24	0.0668423	32.0754
mKIAA4074	-9.05767	4.77009	1.07617e-09	8.80545e-09	0.101292	54.4253
Gm4934	-9.05728	-0.664833	1.13143e-08	8.03318e-08	0	1.18727
Apoa4	-9.05684	-0.690943	0.000123523	0.000459472	0	1.18942
Dysf	-9.05641	4.85877	1.26054e-36	9.91066e-35	0.101879	57.8432
Hpcal4	-9.05572	-0.657083	2.77281e-08	1.86651e-07	0	1.18179
F930015N05Rik	-9.05365	-0.666264	9.77353e-09	7.00732e-08	0	1.18332
Parvg	-9.05217	4.11496	4.97981e-30	2.59879e-28	0.0606827	34.5171
Tmem52	-9.05135	2.97016	1.08123e-09	8.84201e-09	0.0267232	15.5341
Gjb5	-9.04881	-0.652877	1.41259e-06	7.36795e-06	0	1.17437
Tmprss2	-9.04555	6.37179	1.29544e-44	1.70197e-42	0.311219	165.226
Cyp2r1	-9.04506	-0.68645	1.85415e-07	1.1064e-06	0	1.18031
Selplg	-9.04369	6.91046	4.22459e-38	3.57479e-36	0.448659	240.081
Ccr5	-9.04235	1.65103	3.82592e-14	5.32305e-13	0.0122504	6.17696
Mup13	-9.03379	-0.697185	1.97761e-07	1.17655e-06	0	1.17115
Ncr1	-9.03166	-0.680362	2.48067e-08	1.68233e-07	0	1.1624
Sfpi1	-9.03042	4.68318	1.70287e-28	7.94538e-27	0.0896282	51.2266
Pira6	-9.02963	-0.681846	2.89281e-08	1.94074e-07	0	1.16061
Bcl2a1a	-9.02823	-0.688203	1.08796e-08	7.75025e-08	0	1.16164
Wdr9	9.02747	-0.718056	4.02847e-08	2.65332e-07	1.16701	0
cml3	-9.02717	-0.683156	3.76337e-08	2.48636e-07	0	1.15829
Ppp1r3b	-9.02402	5.61939	7.35725e-46	1.03468e-43	0.190426	98.043
Gm16979	-9.01736	-0.705006	2.08177e-08	1.42731e-07	0	1.15594
AK083547	-9.01593	-0.697786	1.46645e-08	1.02635e-07	0	1.15082
Fgd2	-9.01275	5.49499	1.11699e-37	9.21751e-36	0.180395	89.9462
Ccdc3	-9.00558	4.8231	1.58304e-28	7.42096e-27	0.0941885	56.4465
Scd1	-9.00474	13.1765	1.39678e-53	3.42956e-51	35.9755	18480.6
Tex15	-8.9988	-0.704889	2.10152e-07	1.24508e-06	0	1.13455
Nrxn3	-8.99703	2.86738	3.45127e-20	8.75383e-19	0.0217091	14.4917
Mlxipl	-8.99451	5.94023	6.38368e-48	1.03926e-45	0.244336	122.482
Lcn4	-8.99168	-0.724483	1.25171e-08	8.84735e-08	0	1.13345
Sepp1	-8.99124	7.88924	7.06785e-49	1.21677e-46	0.92306	473.154
Tpm2	-8.99059	7.68911	3.2087e-11	3.25709e-10	0.806742	411.825
Zfp831	-8.98856	3.2776	6.28519e-20	1.54957e-18	0.0339728	19.2951
Alpk2	-8.98702	1.65422	3.42678e-07	1.96571e-06	0.0122504	6.17131
Il23a	8.98561	4.03802	5.9793e-29	2.87958e-27	32.7275	0.0646109
Ptprb	-8.98464	5.09335	6.04014e-40	5.95173e-38	0.134352	68.0572
Fam115c	-8.98285	1.58561	1.27051e-14	1.86651e-13	0.0122504	5.90878
Irak-M	-8.98272	-0.725095	4.30218e-08	2.82366e-07	0	1.1231
Hcst	-8.9826	3.84294	4.38157e-26	1.77605e-24	0.0534463	28.5733
Scarf1	-8.97853	4.78005	8.10842e-35	5.75563e-33	0.101879	54.7761
Wscd1	-8.9774	1.58259	1.30867e-14	1.92068e-13	0.0122743	5.8961
Pnmal2	-8.97396	-0.748476	5.17096e-08	3.35393e-07	0	1.12252
Pcsk5	-8.97334	3.26573	3.28578e-23	1.06868e-21	0.0339595	19.1223
Slc38a4	-8.97311	3.19926	9.83193e-17	1.81464e-15	0.0289455	18.2419
Lmod1	-8.97099	3.54947	6.21874e-21	1.68125e-19	0.0411959	23.2817
TRB	-8.9649	-0.749222	1.44211e-08	1.01096e-07	0	1.11237
Lrrc9	-8.96421	-0.738018	1.82408e-07	1.08972e-06	0	1.10768
Unc5cl	-8.96381	1.494	1.0722e-14	1.59314e-13	0.00723636	5.55288
Psapl1	-8.96301	1.47288	1.35895e-07	8.24705e-07	0.00723636	5.43393
mKIAA1555	-8.96075	2.46229	3.87545e-13	4.85729e-12	0.0245009	10.9386
Ntrk2	-8.96005	6.771	2.03675e-50	3.93618e-48	0.431154	217.913
Pcx	-8.95798	9.67295	6.82401e-48	1.10494e-45	3.27025	1629.25
Fam13a	-8.95724	5.00944	2.21238e-36	1.71245e-34	0.126379	64.2038
Smarca1	-8.95524	-0.752851	2.9701e-08	1.98859e-07	0	1.10254
Ascl2	-8.95442	-0.76737	6.33638e-08	4.05223e-07	0	1.10756
Mup15	-8.95267	-0.771198	1.21702e-07	7.4491e-07	0	1.10672
P2ry6	-8.95226	5.13308	2.3445e-36	1.81004e-34	0.130824	69.9829
Xlr4b	-8.95223	-0.757846	1.95347e-08	1.34675e-07	0	1.10111
AK029023	-8.95214	-0.758353	1.84801e-08	1.27904e-07	0	1.10123
Kbtbd5	-8.95133	3.20907	2.11245e-05	9.00377e-05	0.0339595	18.3457
BV12S11J2S3	-8.94602	-0.759254	5.4919e-08	3.5493e-07	0	1.09473
Flt4	-8.93648	4.10457	4.44942e-27	1.90132e-25	0.0757249	34.2544
Prcd	-8.93156	-0.785	2.80361e-08	1.88428e-07	0	1.0889
Ppic	-8.93129	4.20157	2.74685e-30	1.4667e-28	0.0729331	36.6396
Spaca1	-8.92903	-0.789855	4.96324e-08	3.22853e-07	0	1.08784
Akr1c14	-8.92871	1.45902	5.81657e-13	7.14373e-12	0.00723636	5.39688
Sprn	-8.92852	-0.780862	1.97314e-08	1.35968e-07	0	1.08348
Cd300lg	-8.92803	6.19254	5.9849e-48	9.7966e-46	0.292454	145.898
Hsd11b1	-8.92609	5.06813	1.01205e-37	8.42106e-36	0.133616	66.8725
Arhgap30	-8.9233	5.46018	2.9028e-41	3.16194e-39	0.174833	87.7994
H2-M9	-8.92226	-0.781216	6.4648e-08	4.12819e-07	0	1.07671
Eif4e3	-8.9203	4.07514	1.3414e-27	5.9225e-26	0.0718703	33.5521
Evl	-8.92014	4.89142	1.07017e-33	7.22004e-32	0.123413	59.167
AK081964	-8.91995	-0.778423	3.00859e-07	1.73746e-06	0	1.07391
Susd3	-8.91207	2.89277	2.269e-17	4.46276e-16	0.0317372	14.7566
Cd200	-8.90979	4.62441	1.5492e-30	8.33145e-29	0.0997046	49.1391
AK044491	8.9095	-0.813568	2.2465e-08	1.53359e-07	1.06893	0
1810010D01Rik	-8.9092	2.32474	4.87111e-18	1.03047e-16	0.0194868	9.92611
BC026585	-8.90792	3.15089	2.61182e-21	7.35311e-20	0.0289455	17.65
Rasgef1c	-8.90777	1.43936	1.10106e-14	1.63197e-13	0.00723636	5.34174
Hist3h2ba	-8.90436	-0.815809	1.20218e-07	7.36256e-07	0	1.07011
Cyyr1	-8.90227	3.80094	7.35038e-26	2.93574e-24	0.0584627	27.742
Tcrd	-8.90204	-0.806445	2.15682e-08	1.47607e-07	0	1.06409
Cybb	-8.9003	2.82339	4.03988e-19	9.43217e-18	0.0267232	14.04
Jakmip3	-8.89814	-0.8097	2.36986e-08	1.61339e-07	0	1.06103
Ugt3a2	-8.89461	-0.81027	3.48874e-08	2.3136e-07	0	1.05729
Slc34a2	-8.89012	-0.809978	1.04999e-07	6.49041e-07	0	1.05257
Igdcc4	-8.88888	4.28336	2.06904e-31	1.18505e-29	0.0751555	38.7867
Gm572	-8.8862	-0.794657	0.00011317	0.0004237	0	1.04924
AK084494	-8.88474	-0.797764	4.89652e-05	0.000196142	0	1.04788
Aebp1	-8.88399	7.65282	1.70921e-50	3.32464e-48	0.845683	401.571
Mefv	-8.88147	-0.825973	2.47224e-08	1.67737e-07	0	1.04912
sco-spondin	-8.87927	2.29521	1.01789e-17	2.09128e-16	0.0194868	9.72419
Rab3il1	-8.8773	4.90757	2.60761e-38	2.23174e-36	0.121365	59.8246
Cacna1f	-8.87646	-0.833111	2.48458e-08	1.68422e-07	0	1.04658
Esr2	8.87615	-0.850033	2.4961e-08	1.69126e-07	1.04669	0
Adcy5	-8.87512	6.32103	3.1675e-46	4.5837e-44	0.337943	159.49
Ptpro	-8.87256	2.29049	3.93639e-17	7.58781e-16	0.0194868	9.67568
mKIAA1539	-8.86754	-0.84001	2.41312e-08	1.63912e-07	9.54165e-11	1.03947
Pcdhac2	-8.8596	-0.853754	5.29316e-08	3.42751e-07	0	1.03633
Unc79	-8.85029	-0.849141	7.37607e-08	4.66533e-07	0	1.02433
Vipr1	-8.84955	3.94751	5.36223e-26	2.16185e-24	0.0656968	30.7203
Tbxa2r	-8.84797	3.9482	6.50465e-21	1.7526e-19	0.0656968	30.7441
AK190465	-8.84086	-0.849367	9.35378e-07	5.00881e-06	0	1.01605
Cyp4f14	-8.84037	-0.879908	5.04129e-07	2.81529e-06	0	1.02439
Csf2rb	-8.83835	6.61426	1.35552e-49	2.40264e-47	0.422126	195.439
B3galt2	-8.83639	3.41399	1.80903e-19	4.31445e-18	0.0411959	21.1814
Kera	-8.8348	-0.865831	4.8657e-08	3.16852e-07	0	1.01412
AB124611	-8.83452	3.12542	1.18711e-20	3.13526e-19	0.0339595	17.3488
Ano7	-8.8338	-0.86245	1.35876e-07	8.24705e-07	0	1.0121
Dio3os	-8.83174	-0.876085	3.31886e-08	2.20778e-07	0	1.0151
Fbp2	-8.83169	1.52413	9.14733e-06	4.14411e-05	0.0122504	5.62717
Csf2rb2	-8.82947	6.22711	6.36746e-49	1.10253e-46	0.325415	149.42
Slc2a4	-8.82635	7.72787	6.75821e-47	1.04352e-44	0.927079	422.97
mKIAA4190	-8.81926	2.81073	1.38472e-19	3.32634e-18	0.0321287	13.9196
4930544D05Rik	-8.8185	-0.862387	1.42485e-05	6.25185e-05	0	1.00025
Lrtm2	-8.81706	-0.881175	6.62787e-08	4.22405e-07	0	1.00127
AK014513	-8.81702	-0.875842	2.65558e-07	1.54883e-06	0	0.999865
Slc5a7	-8.81653	2.23699	1.20953e-15	1.98528e-14	0.0194868	9.31468
Snord47	8.81575	1.30854	2.96893e-14	4.17525e-13	4.87809	0.0074825
2810047C21Rik1	-8.81155	-0.8782	6.40981e-07	3.52046e-06	0	0.99566
Klhl29	-8.8069	2.72961	7.27276e-19	1.65167e-17	0.0267232	13.1681
Fhl5	-8.80641	-0.882534	7.37704e-07	4.0178e-06	0	0.992056
Lat	-8.80557	5.68369	1.55892e-29	7.80892e-28	0.215438	102.52
mKIAA1401	8.80301	1.15206	1.13817e-13	1.51326e-12	4.37122	0.00889984
AK014969	-8.80137	-0.899949	3.79079e-08	2.50393e-07	0	0.991996
Rac2	-8.8002	8.34015	6.56652e-41	6.97518e-39	1.44118	646.627
Spic	-8.79981	-0.89989	4.45697e-08	2.91631e-07	0	0.990304
Necab2	-8.79141	-0.917771	8.03012e-08	5.05553e-07	0	0.988552
Cul9	-8.79115	5.63915	3.89269e-43	4.72087e-41	0.216326	99.3848
Dab1	-8.78716	-0.921268	7.27167e-08	4.60611e-07	0	0.985494
Evi2b	-8.78233	4.41604	2.93166e-31	1.66488e-29	0.100306	42.5126
Tmem45b	-8.77927	6.54741	6.46326e-38	5.42316e-36	0.429184	186.545
AK205379	8.77902	6.60093	1.43659e-31	8.35593e-30	193.648	0.426975
AK192194	-8.77828	4.67114	1.07954e-25	4.25494e-24	0.100114	50.7818
Pde3b	-8.77821	6.05336	9.51231e-38	7.93709e-36	0.298969	132.458
Gprin2	-8.77703	-0.928179	5.1463e-08	3.33963e-07	0	0.977685
Krt75	-8.7756	-0.895491	0.000217883	0.000775785	0	0.971562
Cux2	-8.77237	-0.927878	4.43932e-08	2.90666e-07	0	0.972607
Esrrb	-8.76955	1.30146	9.15932e-14	1.22814e-12	0.00723636	4.85063
Cd4	-8.76668	4.77215	4.01414e-35	2.91147e-33	0.123151	54.4531
Igf1	-8.7656	5.38106	5.51374e-41	5.87772e-39	0.190511	83.0686
2900052N01Rik	-8.76252	-0.928207	2.07179e-07	1.22868e-06	0	0.962993
Il1r2	-8.76172	2.11413	5.60718e-15	8.59145e-14	0.0144727	8.55048
Erbb4	-8.76115	-0.938491	4.4663e-08	2.92178e-07	0	0.965125
AK217986	-8.7581	-0.930409	3.65085e-07	2.08745e-06	0	0.959655
Mgat5b	-8.75725	-0.945908	5.45997e-08	3.53094e-07	0	0.964086
Chrna10	-8.75639	-0.914196	0.000135972	0.000501913	0	0.958428
Tcte1	-8.74713	-0.959062	9.79035e-08	6.08318e-07	0	0.958652
Slitrk6	-8.74437	-0.941172	6.66379e-07	3.65192e-06	0	0.950219
AK036422	-8.74186	-0.981639	1.17519e-05	5.21985e-05	0	0.957197
Mogat2	-8.74106	1.34857	2.08726e-13	2.70408e-12	0.0122504	5.00743
Abcc6	-8.74105	-0.972171	6.13157e-07	3.38315e-06	0	0.956217
AK163121	-8.73984	-0.940936	2.50364e-06	1.25057e-05	0	0.946834
Sprr1a	-8.73902	2.15642	1.45112e-17	2.92323e-16	0.0194868	8.8203
Serpina1d	-8.73856	-0.979306	2.38988e-06	1.19754e-05	0	0.954971
Dpysl4	-8.73699	-0.959705	5.53166e-08	3.57422e-07	0	0.948547
Adra2c	-8.73409	-0.963528	5.04358e-08	3.27866e-07	0	0.947101
Enho	-8.73244	4.44671	4.21565e-28	1.92207e-26	0.0996563	43.4465
Fmn2	-8.72815	-0.966938	6.16218e-08	3.9501e-07	0	0.942349
Mybpc3	-8.72729	-0.974931	6.97212e-08	4.42572e-07	0	0.944696
AK020556	-8.72567	1.26121	6.34193e-14	8.64297e-13	0.00723636	4.70258
Nphp4	-8.72082	1.25058	7.50007e-13	9.09574e-12	0.00723636	4.68426
Fibin	-8.71755	1.32555	1.35365e-13	1.78392e-12	0.0122504	4.92049
Mir23b	-8.71659	-0.97783	6.62121e-08	4.22176e-07	0	0.934868
BC048393	-8.71434	-0.983985	5.73966e-08	3.69507e-07	0	0.935079
Kif26a	-8.71223	4.72391	4.56723e-29	2.21378e-27	0.129171	52.6568
AK146183	-8.70208	-0.992623	6.19898e-08	3.97114e-07	0	0.92602
Scn4a	-8.70122	5.02912	2.03982e-13	2.64399e-12	0.150311	65.0437
Gbgt1	-8.70119	1.2371	8.19491e-14	1.10327e-12	0.00723636	4.623
Gpr64	-8.70107	2.19563	1.52693e-14	2.22359e-13	0.0245191	9.04424
Rasl10b	-8.69845	-1.00484	1.32685e-07	8.06533e-07	0	0.927
Pdgfd	-8.69807	1.23344	4.04024e-13	5.0596e-12	0.00723636	4.60575
Inmt	-8.69793	2.99088	1.20993e-20	3.19045e-19	0.0339595	15.7796
Olig1	-8.69716	-1.01735	2.24642e-06	1.13114e-05	0	0.92798
Bcl11b	-8.69693	5.05659	1.29033e-21	3.73088e-20	0.161767	66.3417
Stra6	-8.69496	3.03512	2.27178e-21	6.41992e-20	0.0389736	16.2722
Mup17	-8.69434	-1.01441	4.98601e-07	2.78753e-06	0	0.925618
Cd177	-8.68985	-0.999456	1.0959e-07	6.75552e-07	0	0.916518
Apoa5	-8.6897	1.16389	5.39372e-05	0.000214311	0.00723637	4.42852
Defb1	-8.68646	-0.98709	7.35714e-06	3.38686e-05	0	0.912153
Sez6l	-8.68447	-1.0115	6.26809e-08	4.01284e-07	0	0.915805
Ret	-8.68434	2.10248	2.65485e-17	5.19779e-16	0.0194868	8.4925
Gng4	-8.6829	-1.01127	6.23537e-08	3.99359e-07	0	0.914113
okadin type I	-8.68103	-1.01033	7.75352e-08	4.89168e-07	0	0.911866
Klk1b27	-8.67913	-1.02554	2.53106e-07	1.48082e-06	0	0.915355
AK076344	-8.67861	-1.02805	4.15359e-07	2.34756e-06	0	0.91542
Accn1	-8.6747	-1.02752	1.68889e-07	1.01263e-06	0	0.912035
BC021891	-8.67299	1.20527	3.67499e-13	4.6157e-12	0.00723636	4.53434
Retnlg	-8.67232	-1.00985	4.71626e-07	2.64511e-06	0	0.903983
Rab36	-8.66671	2.02468	1.50235e-16	2.70613e-15	0.0144727	8.04138
Aspdh	-8.66018	-1.06074	3.09811e-05	0.000128537	0	0.904493
Ccdc129	-8.65992	2.01644	8.41608e-16	1.40998e-14	0.0144727	7.98918
Cd55	-8.65989	4.74848	1.92794e-36	1.50394e-34	0.129281	53.5528
Crip3	-8.65646	1.19188	1.59843e-12	1.87769e-11	0.00723636	4.46976
Lrrc15	-8.65631	2.94966	1.05466e-20	2.80323e-19	0.0339595	15.334
Cd34	-8.65212	6.47781	2.02889e-38	1.74642e-36	0.444799	177.719
Adamts20	-8.64698	1.18368	2.1097e-13	2.72867e-12	0.00723636	4.4496
Gna14	-8.64667	2.51731	2.99495e-18	6.44495e-17	0.0217091	11.3482
Mup7	-8.64199	-1.02516	1.88106e-05	8.08657e-05	0	0.884323
Tnfrsf17	-8.64181	-1.04449	1.29034e-07	7.85933e-07	0	0.886588
Ighg	-8.63864	-1.06823	1.06647e-06	5.66622e-06	0	0.890839
Tek	-8.63299	3.82813	4.67842e-22	1.39584e-20	0.062905	28.2506
Itgbl1	-8.6312	1.98932	2.10127e-16	3.72445e-15	0.0144727	7.84579
Cacng8	-8.62609	-1.0925	3.21891e-05	0.000133217	0	0.883411
Nid1	-8.62215	8.5829	1.03599e-49	1.85827e-47	1.93689	764.885
Pi16	-8.62175	7.08987	1.26986e-46	1.90194e-44	0.682041	271.698
Fbln5	-8.61465	5.35124	1.33758e-39	1.2842e-37	0.201535	81.3518
Ehd3	-8.61424	4.03454	2.1255e-26	8.76988e-25	0.0887713	32.6069
AK214371	8.61312	-1.09571	9.59864e-08	5.97025e-07	0.871684	0
Hic1	-8.61267	5.12411	8.43057e-30	4.32427e-28	0.169798	69.5154
Lgi1	-8.60615	-1.05723	2.52799e-05	0.000106506	0	0.862508
Asxl3	-8.60488	-1.08413	9.30824e-08	5.80046e-07	0	0.86616
Xlr4a	-8.59985	-1.08326	1.58798e-07	9.56524e-07	0	0.861105
Ptprm	-8.59979	4.315	2.45042e-31	1.39814e-29	0.0996564	39.6272
Olfml2a	-8.59807	2.89125	2.78624e-20	7.12132e-19	0.0339595	14.7286
Hc	-8.59666	2.83256	1.50669e-17	3.02701e-16	0.0289455	14.1258
Myocd	-8.59648	-1.10084	2.90653e-07	1.68372e-06	0	0.864085
Dpep3	-8.59517	-1.09263	1.01862e-07	6.30953e-07	0	0.860153
Lass4	-8.59471	4.60802	1.27935e-30	6.91749e-29	0.129474	48.555
Gzma	-8.59325	-1.08648	2.67659e-07	1.56048e-06	0	0.856331
Gja5	-8.58685	2.42094	2.00707e-17	3.97118e-16	0.0273145	10.5953
Klk5	-8.58511	-1.07206	0.000110241	0.000413558	0	0.850274
Serpina12	-8.58317	-1.07612	5.15614e-05	0.000205771	0	0.848908
HELG	8.5785	-1.1337	1.40662e-07	8.52942e-07	0.853074	0
C2	-8.57324	5.23571	4.75336e-41	5.10347e-39	0.189284	75.0866
AK048995	-8.5704	-1.12492	3.08253e-07	1.77879e-06	0	0.848598
AK219638	8.57026	-1.14895	3.26663e-07	1.8778e-06	0.850359	0
mKIAA0897	-8.56994	2.91976	2.41817e-19	5.70364e-18	0.0314286	15.0263
E230029C05Rik	-8.56822	-1.11533	1.32916e-07	8.07604e-07	0	0.843386
Igsf5	-8.56691	-1.11455	1.63553e-07	9.82202e-07	0	0.841915
Col11a1	-8.56342	-1.12443	1.25935e-07	7.68779e-07	0	0.842346
Aldh1a2	-8.56096	1.09904	2.27679e-13	2.93718e-12	0.00723636	4.19448
C030019I05Rik	-8.55928	-1.11245	1.01187e-06	5.3924e-06	0	0.835284
Prss34	-8.5553	-1.13274	1.29307e-07	7.87273e-07	0	0.837922
Tm4sf5	-8.55274	-1.14256	4.53053e-07	2.54858e-06	0	0.838575
Dysfip1	-8.54986	3.67127	0.000151795	0.000554651	0.0656968	25.2983
BC051142	-8.54385	-1.14015	1.24903e-07	7.62634e-07	0	0.830113
Pira7	-8.53847	-1.13922	2.09743e-07	1.24314e-06	0	0.82493
Cd209e	-8.53799	-1.12391	8.78119e-06	3.9897e-05	0	0.822363
Ndufa4l2	-8.53751	3.12052	3.61862e-21	1.00181e-19	0.0411959	17.2773
Haao	-8.53658	3.16355	4.03035e-20	1.01453e-18	0.04621	17.8054
Scn1b	-8.53241	6.19505	4.6889e-36	3.54687e-34	0.388597	146.047
C1qtnf2	-8.53135	1.06984	2.94136e-13	3.74133e-12	0.00723636	4.10911
Cthrc1	-8.52698	1.05945	3.59421e-12	4.04906e-11	0.00723636	4.09359
Gpr114	-8.52668	4.29904	1.40069e-28	6.60752e-27	0.0968645	39.1997
Lyzl4	-8.52557	-1.15102	2.3144e-07	1.36231e-06	0	0.817553
Fibcd1	-8.52066	-1.17689	1.47516e-06	7.67157e-06	0	0.820879
Cdo1	-8.51964	8.21206	5.7859e-36	4.36566e-34	1.60225	591.401
Cacng6	-8.51928	2.15685	0.000158394	0.000577211	0.0245009	8.78004
Hopx	-8.51764	2.86231	3.68575e-18	7.86373e-17	0.0390046	14.4371
Slc16a5	-8.51753	1.87387	2.38973e-15	3.81783e-14	0.0144727	7.24298
AK172386	-8.51735	-1.16499	1.52569e-07	9.21041e-07	0	0.815148
Lilra5	-8.51571	-1.16446	1.58955e-07	9.5728e-07	0	0.813455
Flg	-8.51413	-1.1437	1.54305e-05	6.73496e-05	0	0.808764
AY672066	-8.51412	-1.16905	1.56942e-07	9.45723e-07	0	0.81372
Mchr1	-8.51134	-1.1579	8.42679e-07	4.54901e-06	0	0.808051
Abca1	-8.5095	6.29511	2.55528e-41	2.80379e-39	0.435946	156.53
Gpr65	-8.50916	1.04808	9.69723e-13	1.16192e-11	0.00723636	4.04118
Raver2	-8.50804	1.92889	2.17196e-16	3.84295e-15	0.0194868	7.51629
Taf7l	8.50233	-1.18778	2.56829e-07	1.50143e-06	0.803348	0
Adamts15	-8.49904	4.74805	2.31053e-35	1.70473e-33	0.145866	53.5226
Sh2d1a	-8.49782	-1.17832	2.14896e-07	1.27117e-06	0	0.802508
Integrin Alpha-4	-8.49665	-1.19207	3.83371e-07	2.18242e-06	0	0.806095
Dsg1b	-8.49614	-1.15118	0.00022487	0.000798291	0	0.799273
Sash3	-8.49579	5.12956	1.05493e-36	8.38205e-35	0.199882	69.7395
Glrp1	8.49481	5.22651	2.22331e-34	1.54522e-32	74.5996	0.213874
Pmp2	-8.49288	-1.16423	1.18596e-05	5.26223e-05	0	0.796857
Adra1d	-8.49226	2.78382	3.85209e-18	8.20692e-17	0.0339595	13.6705
Apobec2	-8.49204	4.98274	4.42989e-07	2.49525e-06	0.172589	62.9509
Ushbp1	-8.49189	5.40598	9.78034e-44	1.22071e-41	0.23134	84.4882
Npas4	-8.49045	-1.19615	2.96766e-07	1.71581e-06	0	0.802202
1110001A07Rik	8.48929	-1.19581	4.09949e-07	2.31874e-06	0.794948	0
Ptgs2	8.4881	7.72033	4.35174e-40	4.31644e-38	420.549	1.15902
Arhgap9	-8.48662	4.93317	3.90041e-30	2.06791e-28	0.162561	60.8742
Xylt1	-8.48614	2.71847	1.43097e-16	2.58066e-15	0.0289455	13.0681
Duoxa2	-8.48319	-1.21102	1.527e-06	7.91783e-06	0	0.799797
AK052711	-8.48026	-1.18839	6.27203e-07	3.45111e-06	0	0.791126
Kcna7	-8.47294	4.02	2.27138e-09	1.77463e-08	0.0874059	32.2459
AK213636	8.47154	-1.23226	2.44299e-07	1.43349e-06	0.791844	0
Gstm1	-8.46939	7.41337	1.71263e-45	2.36415e-43	0.958981	339.892
Pde2a	-8.46913	5.75693	1.82291e-45	2.50482e-43	0.296177	107.778
Old35	8.46843	-1.22705	1.98228e-07	1.1791e-06	0.787306	0
mKIAA2037	-8.46693	-1.18031	0.00010025	0.000379453	2.68021e-09	0.782834
Sox6	-8.46486	3.15285	4.95441e-15	7.62638e-14	0.051224	17.6363
Cbfa2t3	-8.45267	4.61954	4.51752e-30	2.37407e-28	0.13863	48.9567
AK131834	8.4524	-1.23789	2.45635e-07	1.44105e-06	0.777194	0
Rgs6	-8.44902	-1.223	2.754e-07	1.60031e-06	0	0.775716
Colq	-8.44879	2.56554	2.44876e-18	5.30387e-17	0.0262642	11.7331
AK043365	-8.4472	-1.22234	3.72778e-07	2.12575e-06	0	0.774024
Crtac1	-8.44531	-1.23399	2.43465e-07	1.42916e-06	0	0.77637
AK042927	-8.44526	-1.20048	8.80721e-05	0.000336849	0	0.771025
Lama4	-8.4427	5.97357	3.8525e-44	4.88991e-42	0.365235	125.227
Ascl1	-8.44126	0.97629	3.61867e-12	4.07049e-11	0.00723636	3.85863
Rgs18	-8.441	-1.21502	5.62173e-06	2.64487e-05	0	0.76862
Gm16603	-8.43511	-1.23336	3.98972e-07	2.26349e-06	0	0.76753
Fgf14	-8.42779	-1.23952	4.33768e-07	2.44699e-06	0	0.763483
Th	-8.42534	-1.21716	0.000133688	0.000494338	0	0.760484
IHABP	8.42383	-1.26738	2.62377e-07	1.53117e-06	0.762987	0
Ndc80	8.42283	4.8995	7.73765e-36	5.78008e-34	59.4534	0.175809
A4galt	-8.42209	3.48639	4.05894e-22	1.21707e-20	0.0689495	22.2673
AK080092	-8.41605	-1.24663	8.85001e-07	4.76126e-06	0	0.756427
Kif20b	8.41207	5.61288	1.56057e-44	2.04135e-42	97.5312	0.280564
Apoc2	-8.41179	-1.27149	7.27808e-07	3.97185e-06	0	0.760366
Igsf1	-8.41153	-1.25198	7.04685e-07	3.85338e-06	0	0.754308
Zfp536	-8.40787	-1.26991	3.41486e-07	1.95999e-06	0	0.756981
Olfml3	-8.40633	3.9368	1.41694e-25	5.52662e-24	0.0823918	30.4598
Ndrg2	-8.40229	7.63057	2.0458e-26	8.48781e-25	1.16176	395.069
Sgce	-8.40048	3.2637	3.67136e-21	1.01514e-19	0.0534463	19.0673
Gbx2	-8.39887	-1.28977	2.6823e-06	1.33292e-05	0	0.754575
Plekha4	-8.39863	4.50201	1.00661e-30	5.47241e-29	0.136408	45.1068
mKIAA1568	-8.39855	-1.27543	2.91925e-07	1.69011e-06	0	0.751123
Magel2	-8.39841	-1.26777	4.1437e-07	2.34241e-06	0	0.74843
Smtnl1	-8.39767	1.11784	0.000104904	0.000395269	0.0122504	4.21571
Sptlc3	-8.39714	-1.26527	7.33708e-07	4.00113e-06	0	0.746825
Ccl6	-8.39535	3.70606	5.04871e-22	1.49885e-20	0.0779472	25.9324
Rxfp3	-8.39526	-1.28437	5.41304e-07	3.00886e-06	0	0.75119
Gm266	-8.39426	0.920644	4.20854e-10	3.60912e-09	0.00723636	3.71907
Ebf1	-8.3895	5.94611	5.53779e-46	7.93706e-44	0.364007	122.86
Dhtkd1	-8.3871	1.81018	9.27256e-16	1.54741e-14	0.0194868	6.91193
AK147121	-8.38166	-1.30314	1.77482e-06	9.08843e-06	0	0.745349
Mup14	-8.36633	-1.28804	2.29096e-06	1.15182e-05	0	0.730031
Orm3	-8.36531	1.79065	8.85912e-15	1.32688e-13	0.0194868	6.81064
2310002J15Rik	-8.36246	2.29011	1.47348e-17	2.96627e-16	0.0267232	9.67173
Ctnna3	-8.35943	-1.27814	9.89102e-05	0.000374855	0	0.72613
A230065H16Rik	-8.35887	-1.32275	1.52663e-06	7.91729e-06	0	0.733494
Cyp2b10	-8.35879	-1.27872	9.89258e-05	0.000374867	0	0.725801
TCR BV10S1A2Dbeta1Jbeta2.1	-8.35482	-1.31877	4.55735e-07	2.56175e-06	0	0.729741
Gm94	-8.35087	-1.28731	6.99737e-05	0.000272216	0	0.721705
Asphd2	-8.34753	1.77046	2.54143e-15	4.04293e-14	0.0194868	6.73019
Rag1	-8.34282	-1.30247	1.09017e-05	4.87042e-05	0	0.717608
Myo7b	-8.33934	-1.31364	1.96891e-06	1.00066e-05	0	0.716569
Gpc2	-8.3379	1.76158	1.28541e-15	2.10522e-14	0.0194868	6.6804
Sim2	-8.33554	-1.0759	9.31631e-08	5.80428e-07	0.000381043	0.872276
Fcgrt	-8.33018	6.83085	9.37753e-48	1.49417e-45	0.701171	226.898
Gria4	-8.32735	-1.31402	1.98207e-05	8.48184e-05	0	0.709834
Chdh	-8.32552	5.33419	3.15075e-41	3.41959e-39	0.250537	80.357
Cdhr5	-8.32531	-1.36356	1.30048e-05	5.73553e-05	0	0.71749
9930021D14Rik	-8.32406	-1.35343	1.47458e-06	7.66991e-06	0	0.715824
AK076847	-8.32051	-1.34737	4.34792e-07	2.4523e-06	0	0.711759
Dnajb3	-8.3195	-1.36145	2.99916e-06	1.47933e-05	0	0.714105
Abca8a	-8.31792	4.63204	6.90293e-28	3.09547e-26	0.152334	49.3464
Gm4971	-8.31408	-1.35425	5.16915e-07	2.88293e-06	0	0.70891
Lims2	-8.31288	5.69443	2.13823e-43	2.62502e-41	0.331276	103.157
Cyp2c44	-8.31083	-1.35729	5.20921e-07	2.90418e-06	0	0.707334
Serpinb1a	-8.30749	2.29368	3.91803e-16	6.75674e-15	0.0317372	9.68681
Nppb	8.30701	-1.38051	4.74255e-07	2.65886e-06	0.7054	0
Gm5617	-8.30244	3.92954	2.05112e-23	6.7816e-22	0.097434	30.3083
St6galnac3	-8.30045	1.66072	1.41904e-14	2.07454e-13	0.0144727	6.22343
Dgki	-8.2967	0.92478	1.68839e-11	1.75793e-10	0.0122504	3.693
Ednra	-8.29631	4.18004	2.50485e-28	1.14905e-26	0.116921	36.0523
Slc38a11	-8.29587	-1.35662	1.29163e-06	6.78549e-06	0	0.695814
Alx3	-8.2825	-1.39557	3.74596e-06	1.81776e-05	0	0.696081
Gfra4	-8.28006	2.51082	2.3866e-15	3.81486e-14	0.0289455	11.3047
Fam196a	-8.27555	-1.39213	8.37486e-07	4.52261e-06	0	0.691004
AK171153	-8.27058	0.89327	2.83757e-12	3.23808e-11	0.0122504	3.61708
Scnn1g	-8.26845	-1.38763	6.33042e-07	3.48005e-06	0	0.684234
Ggt1	-8.26785	3.54148	2.90337e-23	9.50498e-22	0.0729331	23.1394
Akr1cl	-8.26709	-1.38369	1.19171e-06	6.28479e-06	0	0.682217
Fam19a5	-8.26337	0.882977	2.73477e-12	3.12553e-11	0.0122504	3.60331
Wnt3	-8.26291	-1.3777	7.15007e-06	3.29965e-05	0	0.67883
Mpeg1	-8.26265	4.45534	1.107e-28	5.25518e-27	0.143644	43.6433
Tnnc2	-8.25161	6.71195	3.11976e-05	0.000129382	0.683122	208.867
C2cd4b	-8.2495	-1.44544	0.000215005	0.000766308	0	0.680546
Pira2	-8.24883	0.792745	1.83272e-11	1.90225e-10	0.00723636	3.3677
Kcnn2	-8.24829	-1.40807	6.16743e-07	3.40168e-06	0	0.675386
S1pr1	-8.24772	6.7552	7.2515e-46	1.02462e-43	0.700335	215.269
Lrrc33	-8.24725	5.87583	2.23611e-44	2.9123e-42	0.379805	116.988
BC106170	8.24587	-1.42558	7.22328e-07	3.94338e-06	0.672675	0
Isoc2b	-8.24038	2.86983	4.8765e-20	1.21628e-18	0.04621	14.4935
Htr4	-8.24035	-1.38993	4.0641e-05	0.000165161	0	0.667962
Kcp	-8.23971	3.40858	2.28383e-19	5.39953e-18	0.0585631	21.1038
Blk	-8.23937	3.75869	1.86558e-23	6.1818e-22	0.0831202	26.9171
Ms4a1	-8.23937	2.55287	2.14418e-18	4.67459e-17	0.0344946	11.618
Prss2	-8.23782	-1.3992	1.0079e-05	4.52715e-05	0	0.666965
Ggt6	-8.23714	0.857329	2.56992e-12	2.94838e-11	0.0122504	3.53668
Tesc	-8.23253	2.15696	1.08998e-12	1.29822e-11	0.0267232	8.83435
Dntt	-8.2324	-1.41482	1.46221e-06	7.61217e-06	0	0.665884
Gm13960	-8.2318	-1.4109	3.05263e-06	1.50323e-05	0	0.664807
Ntf3	-8.22837	-1.42059	1.08581e-06	5.75674e-06	0	0.664518
4921506M07Rik	-8.22821	1.65561	2.61954e-11	2.68911e-10	0.0194868	6.22381
AK006748	-8.22772	-1.42079	1.1407e-06	6.03493e-06	0	0.664119
AK040671	-8.22383	-1.41818	3.00438e-06	1.48166e-05	0	0.661133
9930013L23Rik	-8.22246	-1.43783	8.10876e-07	4.39046e-06	0	0.665358
Hrc	-8.22242	4.12107	2.24057e-07	1.32249e-06	0.114037	34.5724
Kcnk16	-8.21915	-1.44074	8.77386e-07	4.7236e-06	0	0.663805
Susd5	-8.21812	-1.43101	1.03668e-06	5.52065e-06	0	0.660094
Prrg1	-8.2174	0.850349	6.11652e-11	5.95064e-10	0.0122504	3.50053
Slc46a2	-8.21338	-1.40777	0.00018454	0.000665931	0	0.655729
Mgl2	-8.20973	3.96912	3.40054e-23	1.10481e-21	0.10547	31.125
Slc34a1	-8.20955	-1.44282	7.61622e-07	4.13979e-06	0	0.657362
Pah	-8.2063	-1.48177	0.000119363	0.00044527	0	0.660688
1700028K03Rik	-8.20455	-1.46119	2.15396e-06	1.08751e-05	0	0.658779
Gxylt2	-8.20403	2.55404	1.67257e-14	2.41921e-13	0.0389736	11.6456
Gm525	-8.20041	-1.46361	1.77393e-06	9.08655e-06	0	0.65665
Car1	-8.19089	-1.4482	3.24635e-06	1.59221e-05	0	0.646168
mKIAA4048	-8.1823	-1.45936	1.88444e-06	9.61316e-06	0	0.642915
Hrasls5	-8.17215	-1.49829	9.32525e-06	4.21706e-05	0	0.645069
Fam184a	-8.17086	-1.48896	1.80072e-06	9.21118e-06	0	0.643051
CMAH	8.16785	6.92584	2.4911e-09	1.9372e-08	242.276	0.833955
Bpil3	-8.16594	-1.47559	1.66824e-06	8.58481e-06	0	0.635954
Gstm7	-8.16561	1.59662	5.00571e-13	6.19356e-12	0.0194868	5.93523
Slc22a2	-8.16545	-1.47352	2.38156e-06	1.19357e-05	0	0.635219
Itih1	-8.16536	-1.51118	3.0502e-05	0.000126655	0	0.642338
Xlr4c	-8.16142	-1.4818	1.30426e-06	6.84585e-06	0	0.634479
Sox10	-8.16124	5.40003	1.31665e-40	1.35411e-38	0.291733	84.0842
BC064103	8.1599	2.19153	2.1025e-16	3.72445e-15	9.04382	0.0261261
4932418E24Rik	-8.15893	-1.48937	9.28244e-07	4.97296e-06	0	0.634915
Serpina3m	-8.15861	-1.49088	9.18794e-07	4.92528e-06	0	0.63515
Gpr17	-8.1586	0.70497	9.1584e-12	9.82592e-11	0.00723636	3.16833
Acss1	-8.15639	4.71628	1.328e-32	8.27031e-31	0.180071	52.3071
Rab8B	-8.15532	4.09846	8.38868e-17	1.56051e-15	0.105902	34.0599
AK087024	-8.15524	-1.48647	1.57225e-06	8.12433e-06	0	0.63153
Ptpn5	-8.1527	3.54137	6.88156e-21	1.85042e-19	0.0751554	23.1419
Cd22	-8.15002	6.26043	2.09574e-42	2.44272e-40	0.530979	152.719
Btnl9	-8.14575	3.95722	7.31081e-24	2.4971e-22	0.11523	30.8742
Ldb3	-8.1405	7.09857	1.4688e-07	8.88669e-07	0.96317	273.024
6330512M04Rik	-8.13709	2.716	2.7941e-16	4.88885e-15	0.0411959	13.0339
Fam186b	-8.13699	-1.5116	1.14533e-06	6.05622e-06	0	0.626066
Olfr60	-8.13699	-1.5116	1.14393e-06	6.04989e-06	0	0.626066
AK087201	-8.13669	-1.47798	0.000140991	0.000518526	0	0.621375
dnam-1	-8.13436	-1.4979	4.96299e-06	2.3553e-05	0	0.621048
Syk	-8.13348	-1.52411	2.64146e-06	1.3135e-05	0	0.626876
Sema3g	-8.13163	3.8488	4.92903e-24	1.72487e-22	0.0996563	28.645
Lilrb4	-8.12887	3.09316	5.92887e-18	1.24195e-16	0.0582944	16.9157
Ramp2	-8.12445	5.13233	3.52575e-38	3.00894e-36	0.240949	69.8276
Zfp105	-8.12414	-1.52131	1.12926e-06	5.9786e-06	0	0.619949
Tcra-V8	-8.1236	-1.52187	1.13031e-06	5.98311e-06	0	0.619734
Them5	-8.11937	-1.4934	0.000140104	0.000515388	0	0.613892
Abca6	-8.11889	2.45678	2.40368e-14	3.41081e-13	0.0313989	10.8534
D0H4S114	-8.11538	4.40695	1.08293e-17	2.21428e-16	0.150321	42.1741
AK021232	-8.11487	-1.52353	1.75825e-06	9.02011e-06	0	0.614236
Tmem178	-8.1147	-1.5343	1.4166e-06	7.38759e-06	0	0.617218
C3ar1	-8.11374	3.69868	9.89506e-20	2.40981e-18	0.0888033	25.784
Hdrpa	-8.10891	-1.54899	4.24045e-06	2.03562e-05	0	0.616753
AK163153	-8.10416	-1.53481	1.49968e-06	7.7883e-06	0	0.610113
Hsd17b14	-8.0993	0.64714	1.02959e-11	1.09795e-10	0.00723636	3.04164
Myoc	-8.0961	2.38924	4.51882e-14	6.25515e-13	0.0339595	10.346
Kcns1	-8.09214	-1.55746	2.00633e-06	1.01812e-05	0	0.608369
Atp4b	-8.08951	-1.54406	2.41764e-06	1.21104e-05	0	0.602965
Cd94	-8.088	-1.53006	2.85756e-05	0.000119417	0	0.600523
Usp13	-8.08679	3.20092	1.11065e-10	1.03772e-09	0.0656968	18.2158
Ddo	-8.08558	3.63939	4.94114e-19	1.13855e-17	0.0845448	24.7423
Solt	8.08286	-1.59834	3.18628e-06	1.56519e-05	0.606998	0
Gm5134	-8.08166	-1.55239	2.08727e-06	1.05598e-05	0	0.59998
Stx1b	-8.07962	2.73677	8.60421e-19	1.9452e-17	0.0437233	13.2047
Sel1l3	-8.07532	1.41719	5.97538e-09	4.40651e-08	0.0144727	5.22156
Diap3	8.0724	5.24941	1.25231e-37	1.02775e-35	75.7325	0.285205
Ttc30a1	-8.07035	1.6311	2.8362e-14	4.0018e-13	0.0216095	6.09923
5430419D17Rik	-8.06976	0.694816	9.11921e-12	9.7909e-11	0.0122504	3.1507
Slc9a4	-8.06914	-1.55876	4.23378e-06	2.03274e-05	0	0.59379
Bmp5	-8.06618	-1.54073	0.000153808	0.000561733	0	0.591445
Pgc	-8.06361	-1.57568	1.53361e-06	7.94525e-06	0	0.594444
Bmx	-8.06332	-1.55537	1.6711e-05	7.24637e-05	0	0.590405
Xkr4	-8.06309	-1.58312	2.17506e-06	1.09724e-05	1.53307e-09	0.596141
Gm10897	-8.06222	-1.57317	1.73214e-06	8.89222e-06	0	0.59279
Hoxb3	-8.05725	3.33192	4.27057e-17	8.17933e-16	0.0729331	20.0044
Sstr4	-8.05564	-1.59126	2.49345e-06	1.24631e-05	0	0.593404
D10920	-8.05246	0.684205	2.75474e-11	2.81921e-10	0.0122504	3.11379
AK047145	8.05229	0.556086	1.36569e-11	1.43895e-10	2.87226	0.0074825
2210407C18Rik	-8.05085	-1.57531	4.11065e-06	1.97902e-05	0	0.586308
Ciita	-8.04922	5.85135	7.48672e-31	4.11495e-29	0.419667	114.981
Mxra8	-8.04412	7.28032	6.69834e-45	8.95753e-43	1.17514	309.651
Gm11818	-8.04337	-1.59073	1.83736e-06	9.38735e-06	0	0.585269
AK002860	-8.03704	-1.60848	2.94698e-06	1.45527e-05	0	0.585922
4930433N12Rik	-8.03645	2.39386	5.65053e-13	6.94549e-12	0.0389736	10.3716
Sct	-8.03425	-1.62683	2.85803e-05	0.00011942	0	0.586575
Cytip	-8.03305	4.58839	1.11083e-29	5.64938e-28	0.189295	47.8482
Qprt	-8.03172	1.46017	4.50474e-13	5.60147e-12	0.0194868	5.41606
Bbp	8.02924	-1.65498	8.02822e-06	3.66985e-05	0.586067	0
AK216857	8.0281	-1.6351	2.03019e-06	1.02971e-05	0.581576	0
Cenpe	8.02768	6.07954	8.97802e-45	1.18998e-42	134.676	0.51656
Gas1	-8.02407	6.50948	7.67929e-22	2.24422e-20	0.695372	181.461
Anks6	-8.01395	2.31008	1.19746e-16	2.18415e-15	0.0339595	9.8118
Lypd2	-8.00565	-1.62505	1.95783e-06	9.95871e-06	0	0.570304
Gda	-8.00495	3.7026	1.0109e-23	3.41777e-22	0.0953408	25.8598
AK080695	-8.00382	-1.62306	2.70102e-06	1.34155e-05	0	0.568611
Gm13918	-8.00168	-1.63633	2.50038e-06	1.24915e-05	0	0.570882
Agxt2	-7.99678	-1.62817	3.00795e-06	1.48318e-05	0	0.565553
Spock3	-7.99514	-1.63944	2.15986e-06	1.0903e-05	0	0.567572
Art5	-7.99469	0.681211	1.6447e-06	8.4782e-06	0.0122504	3.08683
Ltc4s	-7.99247	5.25447	3.37415e-30	1.79207e-28	0.29071	75.9892
AK133017	-7.99244	-1.62584	6.36762e-06	2.96782e-05	0	0.562657
Igf2bp1	7.98967	3.9461	6.00162e-25	2.24723e-23	30.6466	0.11393
Prkg2	7.98934	6.4133	3.37721e-44	4.32326e-42	169.736	0.661096
Lyl1	-7.98556	4.55988	1.46071e-24	5.32953e-23	0.177034	46.9303
X56719	-7.9823	-1.65181	2.45863e-06	1.23055e-05	0	0.562792
Esco2	7.97988	4.25607	1.47088e-24	5.36012e-23	38.0103	0.140802
4933436C20Rik	-7.97242	0.600613	2.64918e-11	2.71674e-10	0.0122504	2.94867
Apol6	-7.97225	5.90589	7.82984e-39	6.98045e-37	0.467243	119.361
Prrt1	-7.9706	2.88403	1.96727e-15	3.16825e-14	0.0584604	14.6429
Gzmc	-7.96792	-1.671	4.18664e-06	2.01108e-05	0	0.558687
Dnase1l3	-7.96776	4.44281	4.66823e-30	2.44898e-28	0.167914	43.2515
mKIAA0050	-7.96598	3.20707	5.29749e-20	1.31581e-18	0.0704243	18.3277
Il33	-7.96525	3.39188	4.3917e-18	9.31023e-17	0.0801696	20.8179
Lpl	-7.96386	9.19956	6.98256e-43	8.30011e-41	4.6844	1171.13
Gm13138	7.96324	1.40674	2.08798e-13	2.70408e-12	5.20893	0.0215592
Fam3b	-7.96306	-1.65597	4.08042e-06	1.96636e-05	0	0.551954
Cd8b1	-7.96082	3.66372	1.13427e-23	3.81764e-22	0.0996301	25.1703
BC096441	-7.9608	1.36288	4.70207e-12	5.22636e-11	0.0227016	5.05235
Ces2g	-7.9593	3.07105	6.73339e-20	1.65462e-18	0.0659819	16.6553
Plac8	-7.94526	4.19729	9.29493e-28	4.13714e-26	0.145866	36.4577
9030425E11Rik	-7.94494	4.27351	4.09608e-24	1.44012e-22	0.160909	38.4505
Hmcn2	-7.94307	4.97218	1.1659e-31	6.84797e-30	0.255551	62.4324
Cenpf	7.94275	6.0509	3.72603e-41	4.01487e-39	132.005	0.527441
AK079912	-7.94138	2.31685	1.0989e-12	1.30677e-11	0.032461	9.83396
Gpr141	-7.94093	-1.67156	7.21478e-06	3.32644e-05	0	0.542779
Fbxo41	-7.94026	-1.6981	6.23815e-06	2.91329e-05	0	0.548509
Gpr83	-7.93859	1.3026	2.24367e-13	2.89819e-12	0.0144727	4.84255
Folr2	-7.9384	5.1784	5.00391e-34	3.4222e-32	0.291733	72.0422
Tnfaip8l3	-7.93808	-1.68124	3.16036e-06	1.55347e-05	0	0.543105
mFLJ00251	-7.93807	-1.6903	2.58073e-06	1.28522e-05	0	0.545565
Pde10a	-7.93356	2.28326	6.08869e-17	1.14709e-15	0.0389736	9.61292
Filip1	-7.93304	1.79255	5.60085e-12	6.17495e-11	0.0217091	6.80802
Sstr1	-7.93084	-1.71378	1.81166e-05	7.80837e-05	0	0.545778
Steap1	7.92864	5.418	1.04414e-38	9.14538e-37	85.1072	0.340424
Ttk	7.92737	4.47341	7.24356e-30	3.74105e-28	44.1902	0.175483
Sgol1	7.92711	5.4164	2.02292e-41	2.23604e-39	85.0061	0.345175
mKIAA0294	-7.92419	-1.68508	9.26568e-06	4.19202e-05	0	0.536283
Cd70	-7.92315	-1.7065	3.41375e-06	1.66953e-05	0	0.5407
Adcy2	-7.92312	2.12334	6.58856e-09	4.83134e-08	0.0289455	8.57679
Chrne	-7.92205	0.460586	1.83702e-06	9.38723e-06	0.00723636	2.63788
AU021092	-7.9191	0.471332	2.66361e-11	2.73036e-10	0.00723636	2.68521
Capn3	-7.9186	3.61816	1.53617e-10	1.4055e-09	0.106753	24.3461
C1ql2	-7.91574	-1.71189	3.1622e-06	1.55412e-05	0	0.537642
Mc5r	-7.91208	1.26488	6.32268e-10	5.30818e-09	0.0144727	4.69097
Tfec	-7.91094	-1.7172	3.42017e-06	1.6724e-05	0	0.536115
Tspan32	-7.91069	4.15686	8.83129e-26	3.49922e-24	0.153672	35.4449
Glra1	-7.9102	-1.70956	3.14887e-06	1.54833e-05	0	0.533613
AK085305	-7.90934	-1.71882	3.84329e-06	1.86137e-05	0	0.535567
Pdlim3	-7.90607	4.82721	2.31062e-15	3.69737e-14	0.236043	56.4329
Adam18	7.90596	-1.72882	3.72088e-06	1.80676e-05	0.530123	0
Cited1	-7.89832	4.95268	3.54573e-35	2.57797e-33	0.249967	61.6052
Adh1	-7.89592	4.92116	4.88539e-35	3.51783e-33	0.247745	60.2653
LOC668917	-7.89294	-1.71298	9.65726e-06	4.3534e-05	0	0.524755
Slc5a5	-7.88873	7.38457	3.81121e-36	2.90496e-34	1.40299	332.73
H2-B2	7.88791	4.09375	3.63166e-27	1.55854e-25	33.9473	0.138361
AK137448	-7.88724	-1.71476	1.51829e-05	6.63752e-05	0	0.522278
Hrnr	-7.88651	0.583888	5.20203e-06	2.459e-05	0.0122504	2.87699
Plekha6	-7.88447	5.66827	1.17095e-41	1.30879e-39	0.423238	101.208
Aadac	-7.88243	-1.72855	4.90502e-06	2.33037e-05	0	0.522024
mSox5L	-7.87844	-1.73712	3.38639e-06	1.65723e-05	0	0.521812
LOC100302688	-7.87638	-1.75226	6.13347e-06	2.86672e-05	0	0.524369
Top2a	7.8744	8.37347	9.11229e-42	1.03393e-39	660.408	2.80532
Hoxc8	-7.8735	3.3135	1.192e-18	2.66068e-17	0.0809305	19.7364
A830093I24Rik	-7.87256	-1.74702	3.28532e-06	1.60988e-05	0	0.520984
Psg22	-7.87231	-1.73145	9.84368e-06	4.4301e-05	0	0.517273
Slc44a4	-7.87117	2.55215	2.69723e-17	5.2773e-16	0.0512241	11.5965
Rimkla	-7.86954	-1.77154	3.3899e-05	0.00013983	0	0.52333
AK017104	-7.86707	-1.73934	6.47124e-06	3.01143e-05	0	0.515907
Rgs1	-7.86442	-1.73682	1.20517e-05	5.34115e-05	0	0.514214
Gnn	7.86387	-1.77589	3.66701e-06	1.78378e-05	0.517346	0
Gm11968	7.86292	4.31889	2.69649e-25	1.03367e-23	39.6986	0.161508
S100a9	-7.86152	-1.74731	4.71349e-06	2.24578e-05	0	0.514541
LOC664987	7.86148	-1.78513	4.14898e-06	1.99523e-05	0.518363	0
Gh	-7.85529	-1.77164	7.43521e-06	3.41755e-05	0	0.516887
Serpinf1	-7.85449	6.96926	2.42223e-44	3.1275e-42	1.08009	249.446
Clec4a3	-7.85399	0.504227	1.76803e-09	1.40072e-08	0.0122504	2.72924
Tcf15	-7.85321	3.36903	5.335e-15	8.19959e-14	0.0823918	20.5227
2310007L24Rik	-7.85301	0.40224	6.1506e-08	3.94436e-07	0.00723636	2.53443
Ly6a	-7.84874	6.35929	1.05516e-32	6.62625e-31	0.710414	163.393
Chi3l3	-7.84867	-1.73718	9.55594e-05	0.000363029	0	0.507771
Anln	7.84618	7.72935	3.04732e-39	2.84369e-37	422.532	1.82523
Dgkb	-7.84452	-1.76488	4.28811e-06	2.05784e-05	0	0.509101
Folh1	-7.84334	-1.7556	1.27175e-05	5.62125e-05	0	0.506732
Lce1d	-7.84283	-1.73798	0.000189726	0.000683163	0	0.505729
AK178359	-7.83983	-1.77277	3.69039e-06	1.79282e-05	0	0.508428
Fam83g	-7.83913	1.77293	3.50529e-15	5.46027e-14	0.0267232	6.72795
Mmp10	7.83763	-1.79564	4.20566e-06	2.01957e-05	0.507043	0
Gpa33	7.83455	6.54666	4.38551e-44	5.54295e-42	186.098	0.810397
Tmem35	-7.83435	-1.77455	4.58717e-06	2.18978e-05	0	0.505693
Hai2	-7.83077	3.87514	1.08052e-06	5.73068e-06	0.124732	29.1773
Srpk3	-7.83009	3.94998	1.72388e-25	6.68032e-24	0.128602	30.7006
Wnt9b	-7.82825	-1.78286	4.14273e-06	1.99286e-05	0	0.504327
H2-Eb2	-7.82452	2.46273	1.27249e-17	2.57898e-16	0.046369	10.9021
Kcnt2	-7.82326	-1.76383	5.21734e-05	0.000208048	0	0.498923
Podn	-7.82089	5.34918	8.03266e-39	7.11889e-37	0.362826	81.0859
Bhlhe22	-7.81872	-1.81728	4.3464e-05	0.000175728	0	0.505307
Fmo4	-7.81871	-1.78564	5.51903e-06	2.60023e-05	0	0.499576
Il21r	-7.81863	5.73384	1.08627e-32	6.80735e-31	0.469802	105.9
Ebf2	-7.81838	3.13499	8.18901e-19	1.85413e-17	0.0779473	17.4026
Cox4i2	-7.81606	0.371453	6.41489e-11	6.22677e-10	0.00723636	2.49886
Efhd1	-7.81566	4.66116	3.30728e-31	1.86221e-29	0.216008	50.3122
Stac2	-7.8102	2.33851	4.44005e-15	6.85576e-14	0.0361818	10.0093
A930018P22Rik	-7.8057	-1.83195	7.19111e-05	0.000279209	0	0.500883
Adamts12	-7.80444	4.48563	3.26704e-29	1.59648e-27	0.194299	44.527
Ripk3	-7.80241	2.48448	9.04425e-17	1.67753e-15	0.051224	11.0664
2900041M22Rik	-7.79684	-1.80521	5.6534e-06	2.65935e-05	0	0.492094
Lrrtm1	-7.79447	0.341452	7.05584e-10	5.88412e-09	0.00723636	2.46029
Hoxd10	-7.78652	-1.80791	1.07015e-05	4.78453e-05	0	0.487343
AK041893	7.78456	1.33043	2.46332e-13	3.16554e-12	4.94156	0.0178381
Hspb7	-7.7843	3.5994	1.62772e-07	9.78099e-07	0.105008	24.0224
Slc22a14	-7.78422	-1.8224	4.31364e-06	2.06976e-05	0	0.489362
Galntl1	-7.78125	3.37908	2.15445e-21	6.10562e-20	0.09242	20.6412
AK043973	-7.7807	-1.81644	8.14826e-06	3.71907e-05	0	0.485977
AK134426	-7.7807	-1.81644	8.14919e-06	3.71907e-05	0	0.485977
Lrrc18	-7.77821	-1.81351	1.44704e-05	6.34364e-05	0	0.484284
Mfi2	-7.77567	0.329339	1.13269e-10	1.05601e-09	0.00723636	2.43146
Myrip	-7.77308	1.13978	8.80528e-13	1.06056e-11	0.0144727	4.31512
Hpse2	-7.77252	-1.82208	9.38773e-06	4.24147e-05	0	0.482919
Angptl4	-7.77012	6.37774	1.39163e-41	1.54968e-39	0.753263	165.484
lpr	7.76991	2.26715	1.16807e-15	1.9225e-14	9.5301	0.0372374
Slc38a3	-7.76907	4.34468	1.2181e-16	2.21544e-15	0.187632	40.3455
NrCAM	-7.76676	-1.02341	1.70622e-07	1.0224e-06	0.0025166	0.896249
Ebi3	-7.76459	3.19267	3.0345e-19	7.10699e-18	0.0801695	18.1357
0610040J01Rik	-7.76243	1.12997	9.11361e-13	1.09506e-11	0.0144727	4.28252
Gabrr2	-7.76211	0.317447	9.88821e-11	9.31451e-10	0.00723636	2.40836
AK088579	-7.7595	-1.83684	6.73724e-06	3.12476e-05	0	0.47922
Tmprss4	-7.75484	1.12191	2.87227e-12	3.27643e-11	0.0144727	4.25134
Rasip1	-7.75404	5.48011	4.68799e-35	3.38382e-33	0.407024	88.7937
Rimklb	-7.75357	-1.84836	5.44121e-06	2.56639e-05	0	0.478821
AK206655	7.75229	-1.88252	6.23895e-06	2.91329e-05	0.480782	0
Adrbk2	-7.75099	3.95553	2.65364e-24	9.46307e-23	0.135982	30.8068
Zmat4	-7.74997	-1.84211	9.97905e-06	4.4863e-05	0	0.475436
Atp8a2	-7.7486	-1.82736	7.79037e-05	0.00030049	0	0.473417
D730001G18Rik	-7.74859	-1.86056	7.09465e-06	3.2761e-05	0	0.479148
Gm13889	-7.74811	3.17218	3.48532e-13	4.39036e-12	0.0801695	17.8923
Pcdh9	-7.74731	-1.83903	1.87151e-05	8.05015e-05	0	0.473743
Cecr2	-7.74455	3.80204	1.43211e-22	4.45934e-21	0.126379	27.6816
Car6	7.73558	2.37064	3.76622e-16	6.50619e-15	10.2341	0.0496459
Bai1	-7.73205	-1.88245	1.44667e-05	6.3432e-05	0	0.47499
AK048257	-7.73022	-1.84822	3.91763e-05	0.000159707	0	0.467592
Cadm3	-7.72611	4.85456	6.6252e-32	3.95335e-30	0.267403	57.5085
Sla	-7.71968	3.28478	2.39917e-20	6.15301e-19	0.0874059	19.3178
Pbk	7.71935	5.34949	7.11398e-40	6.96403e-38	81.1002	0.381222
Gm16602	-7.71909	-1.8908	1.18043e-05	5.24005e-05	0	0.470299
Tceal3	-7.7177	-1.88195	6.06933e-06	2.83896e-05	0	0.467636
Pxt1	-7.71617	0.275134	2.21971e-10	1.98068e-09	0.00723636	2.32851
Cyfip2	-7.71523	4.56477	9.54474e-27	4.01e-25	0.223813	47.0404
Mup9	-7.71071	-1.87704	1.01103e-05	4.53987e-05	0	0.462715
Tbc1d10c	-7.7095	6.54704	5.64078e-30	2.92842e-28	0.887449	186.069
Srms	-7.70818	0.346868	8.61855e-11	8.21409e-10	0.0122504	2.45091
Btbd17	-7.70648	0.256181	1.17144e-09	9.52255e-09	0.00723636	2.31441
Dnaic1	-7.70627	2.007	1.15371e-15	1.89992e-14	0.0339595	7.9227
C79407	7.70578	3.98726	6.33427e-26	2.54007e-24	31.5061	0.148611
Uts2r	-7.70275	-1.86749	7.85969e-05	0.00030293	0	0.458452
Igj	-7.70034	2.76262	4.60127e-18	9.74759e-17	0.0571906	13.4328
Stox1	-7.70019	-1.8992	6.58601e-06	3.05914e-05	0	0.46249
Klrb1b	-7.69891	-1.8847	1.47185e-05	6.44391e-05	0	0.458472
Adamdec1	-7.69873	-1.89574	6.95546e-06	3.21628e-05	0	0.460798
Sncaip	-7.69873	0.257968	1.80294e-10	1.63262e-09	0.00723637	2.30197
Lynx1	-7.69649	5.2879	1.00403e-31	5.9438e-30	0.371902	77.6707
Ect2	7.69511	6.34533	2.52926e-43	3.0924e-41	161.773	0.780793
BC028808	-7.69078	-1.87937	6.83818e-05	0.000266451	0	0.454672
Tnfrsf8	-7.68947	-1.92191	2.35673e-05	9.96271e-05	0	0.461451
Cyp3a59	-7.68714	-1.88114	8.24831e-05	0.000317051	0	0.45346
Miat	-7.68414	0.244312	5.0264e-10	4.27501e-09	0.00723637	2.27477
Grap2	-7.68209	3.9727	1.64401e-18	3.62639e-17	0.144827	31.1933
Slc36a3	-7.68183	-1.90755	7.68071e-06	3.52013e-05	0	0.454681
Nol3	-7.67704	3.92086	2.86425e-23	9.38716e-22	0.151687	30.0571
Adarb2	-7.67609	-1.89594	4.14801e-05	0.000168434	0	0.45025
Fa2h	-7.67544	2.42843	3.56381e-12	4.01784e-11	0.0434182	10.6239
2210016F16Rik	-7.67504	4.75861	3.16932e-26	1.29518e-24	0.257783	53.8161
Krt71	-7.67417	-1.91636	7.11138e-06	3.28331e-05	0	0.452809
Thbs2	-7.67167	6.15064	1.10642e-30	6.00412e-29	0.673038	141.331
Fam109b	-7.67118	1.04033	2.77094e-12	3.16324e-11	0.0144727	4.01561
Rora	-7.66923	2.53834	1.03266e-17	2.12018e-16	0.0534463	11.4836
Tlr8	-7.66786	0.226876	1.29626e-08	9.14067e-08	0.00723636	2.23748
Plxdc1	-7.66345	2.25129	2.19468e-16	3.88085e-15	0.0411959	9.40388
Shcbp1	7.66329	4.5513	4.40674e-23	1.4194e-21	46.6115	0.218685
[truncated: 27,957 more rows]
