# Supplementary material for: Multi-Omics Characterization of the 4T1 Murine Mammary Gland Tumor Model
Source: Front Oncol. 2020 Jul 23;10:1195. doi: 10.3389/fonc.2020.01195 (PMC7390911; doi:10.3389/fonc.2020.01195)
Supplement: Table S7 — Gene set and pathway enrichment in differentially expressed genes of 4T1 cells for upregulated and downregulated genes in GO gene sets and KEGG pathways, respectively (sheets are labeled “up GO”, “up KEGG”, “down GO”, and “down KEGG”, respectively). [file Table_7.XLSX]

## Sheet: up GO
Table S7: Gene set and pathway enrichment in differentially expressed genes of 4T1 cells for upregulated and downregulated genes in GO gene sets and KEGG pathways, respectively (sheets are labelled “up GO”, “up KEGG”, “down GO” and “down KEGG”, respectively).
Term	Overlap	P-value	Adjusted P-value	Old P-value	Old Adjusted P-value	Odds Ratio	Combined Score	Genes
rRNA processing (GO:0006364)	153/202	3.43433e-50	1.75254e-46	0	0	2.93462	334.24	LTV1;RPL4;RPL5;RPL30;RPL3;RPL32;RPL31;RPL34;RPP30;RRP1;FCF1;THUMPD1;PWP2;RPL8;RPL9;RPL6;RPL7;RRP9;RPS15;RPS14;FBL;RPS17;RPS16;RPS19;RPS18;RPL35;RPL38;RPL37;RPS11;RPL39;RPS10;RPS13;RPP38;RPS9;RPL21;RPS7;RPS8;RPL23;RPL22;RPS6;WDR75;CSNK1D;EBNA1BP2;DKC1;XRN2;MRTO4;SBDS;NHP2;PIH1D2;RPL24;RPL27;SRFBP1;RPL26;RPL29;RPL28;NOP2;ISG20L2;NOLC1;RPF1;EMG1;PDCD11;ERI1;UTP20;LYAR;MDN1;RPL41;NOP14;PNO1;RPP40;WDR…
ncRNA processing (GO:0034470)	164/227	6.07821e-49	1.55086e-45	0	0	2.79917	310.77	LTV1;RPL4;RPL5;RPL30;RPL3;RPL32;POP1;RPL31;RPL34;RPP30;RRP1;FCF1;PWP2;RPL8;RPL9;RPL6;RPL7;RRP9;THG1L;RPS15;RPS14;FBL;RPS17;RPS16;RPS19;RPS18;RPL35;RPL38;RPL37;RPS11;RPL39;RPS10;RPS13;RPP38;RPS9;RPL21;RPS7;RPS8;RPL23;RPL22;RPS6;WDR75;SARS;CSNK1D;DICER1;EBNA1BP2;KARS;DKC1;XRN2;MRTO4;SBDS;PIH1D2;RPL24;RPL27;RPL26;RPL29;RPL28;ISG20L2;NOLC1;RPF1;EMG1;PDCD11;ERI1;UTP20;LYAR;MDN1;SMAD2;RPL41;NOP14;SMAD3…
ribosome biogenesis (GO:0042254)	163/226	1.73882e-48	2.95774e-45	0	0	2.79442	307.304	LTV1;RPL4;RPL5;RPL30;RPL3;RPL32;RPL31;RPL34;RPP30;RRP1;FCF1;PWP2;RPL8;RPL9;RPL6;RPL7;RRP9;RPS15;RPS14;FBL;RPS17;RPS16;RPS19;RPS18;RPL35;RPL38;RPL37;RPS11;RPL39;RPS10;RPS13;RPP38;EIF2A;NOM1;RPS9;RPL21;RPS7;RPS8;RPL23;RPL22;RPS6;WDR74;WDR75;CSNK1D;EBNA1BP2;DKC1;XRN2;MRTO4;SBDS;PIH1D2;RPL24;RPL27;RPL26;RPL29;RPL28;ISG20L2;NOLC1;RPF2;RPF1;EMG1;PDCD11;ERI1;RRS1;SURF6;UTP20;LYAR;MDN1;RPL41;NOP14;NOP16;…
rRNA metabolic process (GO:0016072)	144/200	8.13583e-43	1.03793e-39	0	0	2.78962	270.355	LTV1;RPL4;RPL5;RPL30;RPL3;RPL32;RPL31;RPL34;RPP30;RRP1;FCF1;PWP2;RPL8;RPL9;RPL6;RPL7;RRP9;RPS15;RPS14;FBL;RPS17;RPS16;RPS19;RPS18;RPL35;RPL38;RPL37;RPS11;RPL39;RPS10;RPS13;RPP38;RPS9;RPL21;RPS7;RPS8;RPL23;RPL22;RPS6;WDR75;CD3EAP;CSNK1D;EBNA1BP2;XRN1;DKC1;XRN2;MRTO4;SBDS;PIH1D2;RPL24;RPL27;RPL26;RPL29;RPL28;ISG20L2;NOLC1;RPF1;EMG1;PDCD11;ERI1;UTP20;LYAR;MDN1;RPL41;NOP14;PNO1;RPP40;WDR55;RPS26;RCL1…
mRNA splicing, via spliceosome (GO:0000398)	169/261	2.71749e-40	2.77347e-37	0	0	2.50875	228.557	DBR1;EIF4A3;HNRNPU;GPATCH1;HNRNPR;CWC25;CWC27;CCAR1;EFTUD2;PNN;SNRPD2;SNRPD1;RBMX2;MAGOH;CWC22;PAPOLA;SNRPD3;SNRNP35;AQR;SCAF11;PRPF4B;ZCRB1;GTF2F1;WBP11;CRNKL1;GTF2F2;CDC40;WDR77;SRRM1;DHX40;PRPF4;PRPF6;PSPC1;CLNS1A;PRPF3;SNRPG;GEMIN4;CD2BP2;SRSF3;SNRNP27;PPIE;GEMIN5;PPIH;SNRPE;GEMIN6;SNRPF;SRSF5;GEMIN8;SNRNP200;SRSF7;ZCCHC8;DDX5;DHX8;RBM8A;DHX9;CSTF3;DDX1;CSTF2;HTATSF1;RNPC3;PRPF8;ZMAT2;PCBP2;D…
cellular macromolecule biosynthetic process (GO:0034645)	209/367	3.23727e-37	2.7533e-34	0	0	2.20644	185.387	RPL4;RPL5;RPL30;RPL3;RPL32;RPL31;RPL34;SCX;RPL8;PWP1;RPL9;RPL6;RPL7;RPS15;RPS14;RPS17;RPS16;RPS19;RPS18;CHEK1;RPL35;RPL38;RPL37;RPS11;RPL39;RPS10;RPS13;TIPIN;RPL21;RPL23;RPL22;REV1;HUS1;MRPS18A;MRPS18C;THAP1;RRAGC;GRWD1;RPL24;RPL27;NUP98;RPL26;DNA2;RPL29;RPL28;PIF1;SET;MRPL18;BAZ2B;MRPL13;GSPT1;MRPL11;BRIP1;ST3GAL4;BARD1;RPL41;MRPL28;CDC7;CDC6;MRPL24;RPS26;FAM111A;RPS25;POLA1;RPS28;POLA2;RPS27;FU…
mRNA processing (GO:0006397)	173/283	2.06972e-36	1.50882e-33	0	0	2.36849	194.609	DBR1;CCNH;EIF4A3;HNRNPU;GPATCH1;HNRNPR;CWC25;CWC27;CCAR1;EFTUD2;PNN;SNRPD2;SNRPD1;RBMX2;MAGOH;CWC22;PAPOLA;SNRPD3;SNRNP35;SRRM4;AQR;SCAF11;THOC1;THOC3;PRPF4B;THOC2;ZCRB1;THOC5;GTF2F1;WBP11;CRNKL1;GTF2F2;CDC40;THOC7;SRRM1;DHX40;PRPF4;PRPF6;PSPC1;SARNP;ZC3H11A;PRPF3;SNRPG;CD2BP2;SRSF3;SNRNP27;PPIE;GEMIN5;PPIH;SNRPE;GEMIN6;SNRPF;SRSF5;SNRNP200;SRSF7;ZCCHC8;DDX5;DHX8;RBM8A;DHX9;CSTF3;CSTF2;SUPT4H1;HT…
RNA splicing, via transesterification reactions with bulged adenosine as nucleophile (GO:0000377)	152/236	5.98589e-36	3.81825e-33	0	0	2.49542	202.388	DBR1;EIF4A3;HNRNPU;GPATCH1;HNRNPR;CWC25;CWC27;CCAR1;EFTUD2;PNN;SNRPD2;SNRPD1;RBMX2;MAGOH;CWC22;PAPOLA;SNRPD3;SNRNP35;AQR;PRPF4B;ZCRB1;GTF2F1;WBP11;CRNKL1;GTF2F2;CDC40;SRRM1;DHX40;PRPF4;PRPF6;PSPC1;PRPF3;SNRPG;CD2BP2;SRSF3;SNRNP27;PPIE;GEMIN5;PPIH;SNRPE;GEMIN6;SNRPF;SRSF5;SNRNP200;SRSF7;ZCCHC8;DDX5;DHX8;RBM8A;DHX9;CSTF3;CSTF2;HTATSF1;RNPC3;PRPF8;ZMAT2;PCBP2;DHX38;ZRSR2;HSPA8;CPSF7;PRPF38A;FUS;CPSF…
gene expression (GO:0010467)	219/411	4.33507e-33	2.45798e-30	0	0	2.0645	153.843	RPL4;RPL5;RPL30;RPL3;NUP107;RPL32;RPL31;RPL34;EIF4A3;SCX;HNRNPU;RPL8;RPL9;PWP1;RPL6;RPL7;RPS15;RPS14;RPS17;RPS16;RPS19;RPS18;MAGOH;RPL35;RPL38;RPL37;RPS11;RPL39;RPS10;RPS13;RPL21;RPL23;RPL22;MRPS18A;CDC40;MRPS18C;SRRM1;THAP1;NUP93;DHX40;RRAGC;SARNP;ZC3H11A;XRN2;RPL24;RPL27;NUP98;RPL26;RPL29;RPL28;SLBP;NUP205;POM121;SEH1L;DHX8;DHX9;MRPL18;BAZ2B;MRPL13;GSPT1;MRPL11;NUP85;DHX36;DHX38;NUP88;RPL41;UPF…
DNA metabolic process (GO:0006259)	179/314	4.1781e-32	2.13209e-29	0	0	2.20869	159.584	DCLRE1B;NUDT1;PARK7;RBPJ;TATDN1;HELB;ALKBH1;CHEK1;LONP1;SMARCAD1;KPNA2;GEN1;WDHD1;TIPIN;USP7;LIG1;RECQL;REV1;HUS1;LIG4;LIG3;CHD1L;CDC25C;CDC25A;MSH6;EID3;MSH2;MSH3;FANCD2;GRWD1;PSME4;TIMELESS;UBE2V2;NUP98;DNA2;ASF1A;PIF1;RTEL1;DNMT1;BLM;VCP;SET;RNASEH2A;PRKDC;XPC;PDS5B;PDS5A;RAD51AP1;ORC5;ORC4;BRIP1;ORC6;ORC1;ERI1;ERI2;RAD21;ORC3;ORC2;CLSPN;ZRANB3;BARD1;XRCC6;UBE2B;XRCC5;GADD45A;FANCL;INTS3;XRCC2…
viral transcription (GO:0019083)	87/113	5.37526e-30	2.49363e-27	0	0	2.983	201.041	RPL4;RPL5;RPL30;RPL3;NUP107;RPL32;RPL31;RPL34;RPLP0;RPL8;RPL9;RPL6;RPL7;RPS15;RPS4X;RPS14;RPL7A;RPS17;RPS16;RPS19;RPS18;RPL35;RPLP2;RPL38;RPL37;RPS11;RPL39;RPS10;RPS13;RPS9;RPL21;RPS7;NUP133;RPS8;RPL23;RPL22;RPS6;RPL13A;RPS3A;NUP93;NUP50;RPL37A;RPL24;RPL27;NUP54;NUP98;RPL26;RPL29;RPL28;NUP205;POM121;SEH1L;RPL10;DHX9;RPL12;RPL11;RPL36A;NUP160;RPS15A;NUP85;TPR;RPL14;RPS3;NUP88;NUP43;RPL15;RPS2;RPS2…
mitotic cell cycle phase transition (GO:0044772)	137/221	5.53038e-30	2.35179e-27	0	0	2.40182	161.804	CCNH;PPP2R2A;EPS8;PPP1CB;CDC23;CCND1;CHEK2;MYC;CDC27;RCC1;CEP250;NEK2;CDK5RAP2;ACVR1;CEP135;CSNK1D;CDC25C;CDC25A;MELK;CCNE2;AKAP9;OPTN;ANAPC1;KHDRBS1;CUL5;MAX;CUL3;CUL2;CUL1;ARPP19;GSPT1;ORC5;CCNB2;ORC4;CCNB1;SPAST;ORC6;ORC1;ORC3;CEP70;ORC2;CEP192;CEP76;CEP78;PLK4;CDT1;UBE2C;PLK2;PLK1;CDC7;CDC6;INHBA;POLA1;POLA2;CDK6;NASP;UBE2S;CDK4;CDK2;SPDYA;CHMP2A;CDK1;FGFR1OP;MNAT1;CDK14;NES;CEP57;TRIM71;YWHA…
viral gene expression (GO:0019080)	85/110	1.53143e-29	6.01144e-27	0	0	2.99391	198.642	RPL4;RPL5;RPL30;RPL3;NUP107;RPL32;RPL31;RPL34;RPLP0;RPL8;RPL9;RPL6;RPL7;RPS15;RPS4X;RPS14;RPL7A;RPS17;RPS16;RPS19;RPS18;RPL35;RPLP2;RPL38;RPL37;RPS11;RPL39;RPS10;RPS13;RPS9;RPL21;RPS7;NUP133;RPS8;RPL23;RPL22;RPS6;RPL13A;RPS3A;NUP93;NUP50;RPL37A;RPL24;RPL27;NUP54;NUP98;RPL26;RPL29;RPL28;NUP205;POM121;SEH1L;RPL10;RPL12;RPL11;RPL36A;NUP160;RPS15A;NUP85;TPR;RPL14;RPS3;NUP88;NUP43;RPL15;RPS2;RPS27A;RP…
cotranslational protein targeting to membrane (GO:0006613)	75/93	2.00593e-28	7.3116e-26	0	0	3.12457	199.273	RPL4;RPL5;SRP19;TRAM1;RPL30;RPL3;RPL32;ARL6IP1;RPL31;RPL34;RPLP0;SRP14;RPL8;RPL9;RPL6;RPL7;RPS4X;RPS15;RPL7A;RPS14;RPS17;RPS16;RPS19;RPS18;RPL35;RPLP2;RPL38;RPL37;SEC62;RPS11;RPL39;RPS10;RPS13;SEC63;RPS9;RPL21;RPS7;RPS8;RPL23;RPL22;RPS6;RPL13A;RPS3A;SRP9;RPL37A;RPL24;RPL27;RPL26;RPL29;RPL28;RPL10;RPL12;RPL11;RPL36A;RPS15A;SRP72;RPL14;RPS3;SSR1;RPL15;RPS2;RPS27A;RPL17;RPL19;RPL41;RPL35A;RPL23A;SRP…
nuclear-transcribed mRNA catabolic process (GO:0000956)	112/174	8.524e-27	2.89987e-24	0	0	2.49391	149.702	RPL4;EIF4A2;RPL5;EIF4A1;RPL30;RPL3;RPL32;RPL31;RPL34;EIF4A3;PPP2R2A;RPL8;RPL9;RPL6;RPL7;RPS15;RPS14;RPS17;RPS16;RPS19;RPS18;MAGOH;RPL35;RPL38;RPL37;RPS11;MTPAP;RPL39;RPS10;RPS13;RPS9;RPL21;RPS7;RPS8;RPL23;RPL22;RPS6;RC3H1;XRN1;MRTO4;RPL24;RPL27;RPL26;RPL29;RPL28;ZCCHC6;DDX5;RBM8A;GSPT1;RPL41;LSM1;UPF3B;UPF3A;LSM5;MAGOHB;RPS26;RPS25;CNOT6;RPS28;CNOT7;RPS27;CNOT1;CNOT2;RPL27A;RNPS1;RPS20;ATM;RPS24;…
SRP-dependent cotranslational protein targeting to membrane (GO:0006614)	71/89	1.96566e-26	6.26921e-24	0	0	3.09087	182.953	RPL4;RPL5;SRP19;RPL30;RPL3;RPL32;RPL31;RPL34;RPLP0;SRP14;RPL8;RPL9;RPL6;RPL7;RPS4X;RPS15;RPL7A;RPS14;RPS17;RPS16;RPS19;RPS18;RPL35;RPLP2;RPL38;RPL37;RPS11;RPL39;RPS10;RPS13;SEC63;RPS9;RPL21;RPS7;RPS8;RPL23;RPL22;RPS6;RPL13A;RPS3A;SRP9;RPL37A;RPL24;RPL27;RPL26;RPL29;RPL28;RPL10;RPL12;RPL11;RPL36A;RPS15A;SRP72;RPL14;RPS3;RPL15;RPS2;RPS27A;RPL17;RPL19;RPL41;RPL35A;RPL23A;SRP68;RPS26;RPS25;RPS28;RPS2…
translation (GO:0006412)	136/232	2.53346e-26	7.60487e-24	0	0	2.27124	133.861	RPL4;CARS;RPL5;RPL30;RPL3;RPL32;RPL31;RPL34;EPRS;RPL8;RPL9;RPL6;RPL7;RPS15;EFTUD2;EEF1B2;NARS;RPS14;RPS17;MTRF1;RPS16;RPS19;RPS18;RPL35;RPL38;RPL37;RPS11;RPL39;RPS10;RPS13;RPS9;RPL21;RPS7;RPS8;RPL23;RPL22;RPS6;MRPS18A;SARS;MRPS18C;EEF1A1;LARS2;KARS;PPA1;RPL7L1;MRTO4;NHP2;RPL24;RPL27;TARS2;RPL26;RPL29;RPL28;TARSL2;MRPL18;MRPL16;TARS;MRPL13;GSPT1;MRPL11;LARS;ZC3H15;YARS;DARS;RPL41;MRPL28;MRPL24;RPS…
protein targeting to ER (GO:0045047)	75/97	2.97713e-26	8.44017e-24	0	0	2.99572	176.077	RPL4;RPL5;SRP19;RPL30;RPL3;RPL32;RPL31;RPL34;RPLP0;SRP14;RPL8;RPL9;RPL6;RPL7;RPS15;RPS4X;RPS14;RPL7A;RPS17;RPS16;RPS19;RPS18;SEC61G;RPL35;RPLP2;RPL38;RPL37;SEC62;RPS11;RPL39;RPS10;RPS13;SEC63;RPS9;RPL21;RPS7;RPS8;RPL23;RPL22;RPS6;RPL13A;RPS3A;SRP9;RPL37A;RPL24;RPL27;RPL26;RPL29;RPL28;RPL10;RPL12;RPL11;RPL36A;RPS15A;SRP72;RPL14;RPS3;RPL15;RPS2;RPS27A;RPL17;RPL19;RPL41;RPL35A;RPL23A;SRP68;RPS26;RPS…
nuclear-transcribed mRNA catabolic process, nonsense-mediated decay (GO:0000184)	81/112	7.23806e-25	1.94399e-22	0	0	2.80207	155.754	RPL4;RPL5;RPL30;RPL3;RPL32;RPL31;RPL34;EIF4A3;RPLP0;PPP2R2A;RPL8;RPL9;RPL6;RPL7;RPS15;RPS4X;RPS14;RPL7A;RPS17;RPS16;RPS19;RPS18;MAGOH;RPL35;RPLP2;RPL38;RPL37;RPS11;RPL39;RPS10;RPS13;UPF2;RPS9;RPL21;RPS7;NCBP1;RPS8;NCBP2;RPL23;RPL22;RPS6;RPL13A;RPS3A;RPL37A;RPL24;RPL27;ETF1;RPL26;PABPC1;RPL29;RPL28;RBM8A;RPL10;RPL12;RPL11;RPL36A;GSPT1;RPS15A;RPL14;RPS3;RPL15;RPS2;RPS27A;RPL17;RPL19;RPL41;UPF3B;RPL…
G1/S transition of mitotic cell cycle (GO:0000082)	74/105	9.87994e-22	2.52087e-19	0	0	2.73058	132.068	TRIM71;USP37;CDKN1B;MCM7;CCNH;MCM8;MCM10;CCND1;MYC;RCC1;FBXO5;POLE;ACVR1;CDC25A;LATS1;TFDP1;DBF4;CCNE2;TFDP2;MCM3;MCM4;MCM5;MCM6;MCM2;PRIM2;PCNA;CUL5;MAX;CUL3;PRIM1;CUL2;CUL1;TYMS;GSPT1;ORC5;NPAT;ORC4;ORC6;CDC45;ORC1;ORC3;ORC2;E2F1;EIF4E;BRD4;RANBP2;CDT1;RANBP1;RRM2;PLK2;RPA1;RPA2;CDC7;INHBA;CDC6;DHFR;POLE4;CUL4A;POLA1;POLA2;WEE1;CDK6;NASP;RPS6KB1;CDK4;POLE2;RPA3;CDK2;POLE3;SPDYA;MNAT1;CRLF3;CUL4…
viral process (GO:0016032)	123/220	1.77933e-21	4.32377e-19	0	0	2.16618	103.496	USP6NL;RPL4;RPL5;RPL30;RPL3;NUP107;RPL32;RPL31;RPL34;NUCKS1;RPL8;RPL9;RPL6;RPL7;RPS15;RPS14;RPS17;RPS16;RPS19;RPS18;AP1S2;AP1S1;RPL35;RCC1;DENR;RPL38;AP1S3;RPL37;RPS11;RPL39;RPS10;RPS13;RPS9;RPL21;RPS7;RPS8;RPL23;RPL22;RPS6;NUP93;RRAGA;CHMP4C;RPL24;RPL27;NUP98;RPL26;RPL29;RPL28;PPIA;PPID;NUP205;POM121;VCP;SEH1L;TSG101;HTATSF1;NUP160;NUP85;PCBP2;TPR;ATP6V1H;NUP88;MCTS1;RPL41;NUP155;NUP153;RPS26;RP…
ribonucleoprotein complex assembly (GO:0022618)	95/156	2.00317e-20	4.64645e-18	0	0	2.35945	107.018	ISY1;RPL5;RPL3;DDX3X;HSP90AB1;MRPS11;PWP2;BICD1;RPL6;CDC73;RPS15;RPS14;SART1;RPS17;SART3;SNRPD2;RPS19;SNRPD1;OGFOD1;LUC7L;DENR;RPL38;SNRPD3;RPS10;EIF2A;PRMT5;HSP90AA1;PRMT7;NCBP1;SCAF11;RC3H1;DICER1;MRPS7;CRNKL1;WDR77;SHQ1;PRPF6;PRPF18;CLNS1A;MRTO4;SNRPG;GEMIN4;RPL24;GEMIN5;LUC7L3;STRAP;SNRPE;GEMIN6;NAF1;SNRPF;SRSF5;GEMIN8;SNRNP200;LUC7L2;RBM22;DDX6;RPL10;DHX9;YTHDC1;DDX1;RPL12;NOP2;RPL11;SRSF1;D…
DNA repair (GO:0006281)	147/288	2.89985e-20	6.43388e-18	0	0	1.97759	88.966	DCLRE1B;DCLRE1A;NUDT1;NUCKS1;PARK7;EME1;CHEK2;ALKBH1;CHEK1;WDHD1;LIG1;RECQL;HUS1;LIG4;LIG3;CHD1L;MSH6;NEIL3;EID3;MSH2;MSH3;FANCD2;PSME4;TIMELESS;UBE2V2;DNA2;ASF1A;VCP;BLM;RNASEH2A;PRKDC;CDCA5;DDX1;XPC;BRCC3;PDS5B;PDS5A;RAD51AP1;ATXN3;BRIP1;RAD21;ZRANB3;BARD1;FANCI;XRCC4;UBE2B;FANCM;XRCC5;GADD45A;FANCL;INTS3;XRCC2;FANCA;HMGA1;HMGA2;UBE2A;FANCB;PALB2;SETX;POLA1;TDP2;ARTN;TDP1;UBE2T;UBE2N;CDK1;RAD17…
DNA replication (GO:0006260)	79/120	3.29981e-20	7.01622e-18	0	0	2.55069	114.418	FEN1;MCM7;MCM8;MCM10;BRCA1;POLB;ING5;HELB;EXO1;TOP1MT;CHEK1;REV3L;TOPBP1;POLK;POLE;RFC5;WDHD1;TIPIN;RFC3;RFC4;RFC1;RFC2;RMI1;REV1;HUS1;BAZ1A;CDC25C;SIRT1;CDC25A;KIN;DBF4;GRWD1;TIMELESS;MCM3;MCM4;MCM5;NUP98;DNA2;MCM6;TOP1;MCM2;PIF1;BLM;RNASEH2A;SET;ORC5;TBRG1;RECQL4;ORC4;BRIP1;WRN;ORC6;CDC45;ORC1;ORC3;ORC2;RBBP8;CLSPN;BARD1;DUT;RPA1;RPA2;CDC7;NAP1L1;CDC6;FAM111A;POLA1;POLA2;RAD50;NASP;ARTN;POLE2;R…
regulation of G2/M transition of mitotic cell cycle (GO:0010389)	91/149	9.57069e-20	1.95357e-17	0	0	2.36629	103.627	YWHAE;CEP57;CETN2;PINX1;CEP164;KIF14;MECP2;PSMD9;PSMD6;PSMD7;CCND1;PSMD5;PSMD2;PSMD1;CEP250;NEK2;CEP290;NINL;CDK5RAP2;OFD1;USP47;HSP90AA1;CEP135;HAUS4;HAUS3;CSNK1D;HAUS6;TUBG1;DYNLL1;CKAP5;HAUS2;RBX1;HAUS1;PSMA5;RINT1;PSMA6;PSMA3;RAD51C;PSMA4;PSMA1;PSMA2;AKAP9;PSME4;PSME1;PSME2;MAPRE1;DTL;PAFAH1B1;SDCCAG8;PSMD10;DYNC1I2;PSMD12;PSMD11;PSMD14;VPS4B;CUL1;HMMR;PSMA7;AURKA;CCNB1;HAUS8;CEP70;PSMB1;CEP1…
cell cycle G1/S phase transition (GO:0044843)	65/92	2.38199e-19	4.67511e-17	0	0	2.7374	117.383	TRIM71;USP37;CDKN1B;MCM7;CCNH;MCM8;MCM10;CCND1;MYC;RCC1;POLE;ACVR1;CDC25A;CCNA2;LATS1;DBF4;CCNE2;MCM3;MCM4;MCM5;MCM6;MCM2;PRIM2;CUL5;MAX;CUL3;PRIM1;CUL2;CUL1;GSPT1;ORC5;ORC4;ORC6;CDC45;ORC1;ORC3;ORC2;EIF4E;RANBP2;CDT1;RANBP1;PLK2;RPA1;RPA2;CDC7;CDC6;INHBA;CUL4A;POLE4;POLA1;POLA2;WEE1;CDK6;NASP;RPS6KB1;CDK4;POLE2;RPA3;POLE3;CDK2;SPDYA;CRLF3;MNAT1;CUL4B;CDKN3
RNA metabolic process (GO:0016070)	106/191	2.19923e-18	4.15655e-16	0	0	2.15023	87.4249	EIF4A2;EIF4A1;EIF4A3;HNRNPU;HNRNPR;HELB;PAPOLG;ALKBH1;PAPOLA;DDX18;LIG1;THOC1;LIG4;DDX10;LIG3;DICER1;GTF2F1;GTF2F2;DHX40;PRPF4;DKC1;XRN2;SNRPG;DDX6;RNASEH2B;DDX5;RNASEH2A;DHX8;DHX9;DDX1;YTHDC2;DHX36;PCBP2;DHX38;HELQ;PNPT1;LSM1;HNRNPL;SETX;HNRNPM;POLA1;HNRNPK;HNRNPF;HNRNPD;MPHOSPH10;HNRNPC;DHX29;DDX3X;FASTKD1;DDX46;DDX47;DDX42;BICD1;RBM3;SYNCRIP;PTBP1;METTL14;DHX15;POLE;RBM6;DDX59;NCBP1;PARP1;DIS3…
cellular response to DNA damage stimulus (GO:0006974)	158/329	2.26671e-18	4.13108e-16	0	0	1.86069	75.5963	ATF2;CCNK;FMR1;NUDT1;SMC5;SMC6;PARK7;ALKBH8;HELB;CCND1;CHEK2;MYC;ALKBH1;CHEK1;NEK1;WDHD1;LIG1;DDX11;ZBTB38;RECQL;HUS1;CHD1L;MSH6;EID3;MSH2;MSH3;FANCD2;DDIT3;PSME4;TIPRL;TIMELESS;ASF1A;EPHA2;RTEL1;VCP;BLM;CUL5;STXBP4;PRKDC;UBA6;HTRA2;XPC;FBXO45;PDS5B;PDS5A;CDKN2AIP;RAD51AP1;BRIP1;BCL2L11;UBR5;CLSPN;ZRANB3;BARD1;MOAP1;UBE2B;NEK4;GADD45A;FANCL;INTS3;XRCC2;FANCA;UBE2A;SETX;POLA1;ARTN;TDP1;UBE2T;SPDYA…
RNA processing (GO:0006396)	105/193	2.15894e-17	3.79899e-15	0	0	2.10787	80.8881	EIF4A3;HNRNPU;HNRNPR;TSEN2;EFTUD2;HELB;SNRPD2;SNRPD1;MAGOH;SNRPD3;SNRNP35;SRRM4;SCAF11;THOC1;PRPF4B;DICER1;ZCRB1;CDC40;SRRM1;DHX40;PRPF4;PRPF6;RRAGC;DKC1;PRPF3;XRN2;SNRPG;PPIG;SNRPF;SRSF5;SRSF7;ZCCHC6;DHX8;DHX9;CSTF3;YTHDC2;SUPT4H1;RNPC3;PRPF8;DHX36;DHX38;SRPK2;IVNS1ABP;ZRSR2;PNPT1;CPSF6;NONO;LSM1;MAGOHB;LSM5;LSM3;SRPK1;HNRNPL;SETX;SMU1;HNRNPK;LSM6;HNRNPF;HNRNPD;MPHOSPH10;RNPS1;CDK12;HNRNPC;DHX29…
peptide biosynthetic process (GO:0043043)	97/174	4.0315e-17	6.85759e-15	0	0	2.1599	81.536	RPL4;RPL5;RPL30;RPL3;RPL32;RPL31;RPL34;RPL8;RPL9;RPL6;RPL7;RPS15;RPS14;RPS17;RPS16;RPS19;RPS18;RPL35;RPL38;RPL37;RPS11;RPL39;RPS10;RPS13;RPS9;RPL21;RPS7;RPS8;RPL23;RPL22;RPS6;SARS;MRPS18A;MRPS18C;EEF1A1;NHP2;RPL24;RPL27;RPL26;RPL29;RPL28;MRPL18;TARS;MRPL13;GSPT1;MRPL11;DARS;RPL41;MRPL28;MRPL24;RPS26;RPS25;RPS28;COPS5;RPS27;RPL27A;RPS20;RSL24D1;RPS24;FARSB;MRPS17;HBS1L;MRPS14;MRPS11;RPLP0;MRPL32;R…
mitotic sister chromatid segregation (GO:0000070)	57/82	1.27841e-16	2.10443e-14	0	0	2.69323	98.5607	CEP57;PHF23;PINX1;KIF14;SMC4;SMC2;NIPBL;CDC23;CHMP1B;POGZ;NUSAP1;DLGAP5;KIF23;KIF22;SMC1A;TUBG1;ESPL1;CEP57L1;KIFC1;CHMP4C;KIF2C;KPNB1;CHMP5;BECN1;SEH1L;VPS4B;CDCA5;CUL3;MIS12;NCAPG;CDCA8;PDS5B;PDS5A;NCAPH;NSL1;HIRA;DSN1;CCNB1;CHTF8;RRS1;PIBF1;NAA50;SPAG5;PLK1;KLHL22;ZWINT;RAB11A;NDC80;CENPE;KIF18A;KIF18B;PRC1;CHMP2B;CHMP2A;NCAPD2;NCAPD3;RAN
regulation of mitotic cell cycle phase transition (GO:1901990)	99/184	4.71821e-16	7.52406e-14	0	0	2.08463	73.5665	BUB1B;CDC14B;CDC20;PSMD9;PSMD6;PSMD7;CDC23;PSMD5;PSMD2;CDC27;PSMD1;CEP250;KNTC1;NEK2;FBXO5;CDK5RAP2;CEP135;UBE2E1;CSNK1D;AKAP9;PSME4;PSME1;PSME2;ANAPC4;ANAPC1;PSMD10;PSMD12;PSMD11;PSMD14;CUL1;XPC;HMMR;ANAPC10;CCNB1;CEP70;CEP192;CEP76;CEP78;PLK4;UBE2C;PLK1;CDC6;TPX2;ANLN;CDK6;CDC16;CDK2;CDK1;FGFR1OP;YWHAE;CEP57;CETN2;CEP164;KIF14;RIOK2;CEP290;NINL;OFD1;HSP90AA1;HAUS4;HAUS3;HAUS6;TUBG1;DYNLL1;CKAP5…
DNA-templated transcription, termination (GO:0006353)	67/106	5.34303e-16	8.26227e-14	0	0	2.44896	86.1189	CCNH;EIF4A3;TTF2;TTF1;MED18;PCF11;MAGOH;PAPOLA;UBTF;SNRPD3;PRMT5;TBP;NCBP1;NCBP2;THOC1;CD3EAP;THOC3;THOC2;THOC5;CDC40;THOC7;SRRM1;WDR33;DMTF1;POLR1A;SARNP;ZC3H11A;POLR1B;POLR1C;SNRPG;SRSF3;POLR1E;SNRPE;SNRPF;SRSF5;SRSF7;SLU7;SLBP;RBM8A;CSTF3;CSTF2;SRSF1;CSTF2T;U2AF1;TAF1D;TAF1B;POLR2A;FIP1L1;TWISTNB;TAF1A;DHX38;POLR2F;SMN1;POLR2H;POLR2K;CPSF7;CPSF3;CPSF2;UPF3B;GTF2H1;GTF2H2;MAGOHB;GTF2H5;SETX;RNP…
regulation of translation (GO:0006417)	110/213	5.53854e-16	8.3127e-14	0	0	2.0009	70.2908	EIF4A2;CYFIP1;RPL5;NUP107;FMR1;EIF4A3;LTN1;EPRS;RPS6KA3;IPO8;MTRF1;OGFOD1;ALKBH1;EIF2A;LARP4B;PASK;NUP93;ILF3;NCL;GEMIN5;NUP98;RPL26;DDX6;NUP205;POM121;SEH1L;DHX9;SHMT1;DDX1;NOLC1;GIGYF2;NUP160;FXR1;LARP1;NUP85;TPR;NUP88;NUP155;H3F3A;UPF3B;EIF2AK2;UPF3A;NUP153;LARP4;MEX3C;PUM2;EIF1;DHFR;MEX3A;EIF5;CNOT7;CNOT1;CNOT2;CAPRIN1;HNRNPD;CALR;EIF4G2;TRIM71;DDX3X;ELAVL1;RPS4X;RBM3;SYNCRIP;EIF5B;NCBP1;NUP1…
RNA splicing (GO:0008380)	65/106	1.23976e-14	1.80756e-12	0	0	2.37585	76.0778	DBR1;DDX47;EIF4A3;USP39;EFTUD2;SYNCRIP;PTBP1;SNRPD2;SNRPD1;RSRC1;MAGOH;DHX15;SNRPD3;SNRNP35;BCAS2;NCBP1;SCAF11;NCBP2;PRPF4B;ZCRB1;CDC40;SRRM1;PRPF4;DDX19A;DDX19B;PRPF6;PRPF18;RRAGC;PRPF3;SNRPG;LUC7L3;SNRPA1;PPIG;SNRPF;HNRNPH3;SRSF7;SLU7;SF3B2;SF3B3;DHX8;DDX23;U2AF1;RNPC3;PRPF8;TRA2B;SF3B1;SRSF10;SMNDC1;IVNS1ABP;SRPK2;SF3A3;ZRSR2;NONO;LSM1;MAGOHB;SRPK1;SMU1;SNRNP40;LSM6;MPHOSPH10;RNPS1;SNRNP48;CDK…
maturation of SSU-rRNA (GO:0030490)	36/46	1.40605e-13	1.99307e-11	0	0	3.03219	89.7311	WDR3;MRPS11;UTP23;HEATR1;FCF1;PWP2;WDR46;RPS14;EMG1;RPS16;NOB1;RPS19;PDCD11;BMS1;RIOK2;UTP20;RIOK1;UTP14A;DCAF13;NOP14;UTP6;RPS8;UTP3;KRR1;NGDN;UTP18;MRPS9;RPS28;LSM6;TSR2;TSR1;MPHOSPH10;NOL10;SRFBP1;NOL11;RPS24
cell cycle G2/M phase transition (GO:0044839)	71/127	5.32256e-13	7.34081e-11	0	0	2.16604	61.2159	YWHAE;CEP57;CCNH;CETN2;CEP164;PPP2R2A;FOXM1;PPP1CB;CHEK2;ENSA;CEP250;NEK2;CEP290;NINL;CDK5RAP2;OFD1;HSP90AA1;CEP135;PPP1R12A;HAUS4;HAUS3;CSNK1D;HAUS6;CDC25C;MASTL;TUBG1;DYNLL1;CKAP5;CDC25A;HAUS2;HAUS1;CCNA2;LATS1;MELK;AKAP9;PPP1R12B;MAPRE1;OPTN;PAFAH1B1;SDCCAG8;KHDRBS1;DYNC1I2;CUL1;AKAP8;ARPP19;AURKA;CCNB2;CCNB1;HAUS8;CEP70;CEP192;RPS27A;CEP76;CLASP1;CEP78;PLK4;NDE1;CEP152;PLK1;TPD52L1;NEDD1;WEE1…
G2/M transition of mitotic cell cycle (GO:0000086)	70/126	1.16729e-12	1.56755e-10	0	0	2.15248	59.1423	YWHAE;CEP57;CCNH;CETN2;CEP164;PPP2R2A;FOXM1;PPP1CB;CHEK2;ENSA;CEP250;NEK2;CEP290;NINL;CDK5RAP2;OFD1;HSP90AA1;CEP135;PPP1R12A;HAUS4;HAUS3;CSNK1D;HAUS6;CDC25C;MASTL;TUBG1;DYNLL1;CKAP5;CDC25A;HAUS2;HAUS1;CCNA2;LATS1;MELK;AKAP9;PPP1R12B;MAPRE1;OPTN;PAFAH1B1;SDCCAG8;KHDRBS1;DYNC1I2;CUL1;ARPP19;AURKA;CCNB2;CCNB1;HAUS8;CEP70;CEP192;RPS27A;CEP76;CLASP1;CEP78;PLK4;NDE1;CEP152;PLK1;TPD52L1;NEDD1;WEE1;CENPJ…
cytoplasmic translation (GO:0002181)	39/54	1.19388e-12	1.56215e-10	0	0	2.79823	76.822	RPL4;RPL30;RPL32;RPL31;RPLP0;RPL11;RPL36A;RPL8;HSPA14;RPL9;RPL6;GSPT1;RPL7;RPS3;RPLP2;RPL38;RPL15;RPL39;RPL17;EIF4B;ZC3H15;RPL19;RWDD1;RPL41;RPS7;RPL22;RPL35A;RPS3A;RPS26;RPS28;EIF3M;RPL7L1;RPL27A;MRTO4;RPL24;RPL22L1;RPS20;RPL26;RPL29
RNA export from nucleus (GO:0006405)	67/119	1.52516e-12	1.94573e-10	0	0	2.18142	59.3542	NUP107;NXT1;EIF4A3;PHAX;RBMX2;MAGOH;XPO5;UPF2;EIF5A;NCBP1;NUP133;NCBP2;THOC1;THOC3;THOC2;THOC5;CDC40;THOC7;SRRM1;WDR33;NUP93;DDX19A;DDX19B;SARNP;ZC3H11A;NUP50;SRSF3;NUP54;NUP98;SRSF5;SRSF7;SLU7;FYTTD1;SLBP;NUP205;POM121;SEH1L;RBM8A;SRSF1;U2AF1;NUP160;FIP1L1;NUP85;TPR;DHX38;NUP88;NUP43;HNRNPA1;EIF4E;SRSF10;RANBP2;RANBP1;NPM1;SSB;NUP155;CPSF3;CPSF2;UPF3B;NUP153;MAGOHB;XPOT;HNRNPA2B1;NUP35;RNPS1;NUP…
mRNA-containing ribonucleoprotein complex export from nucleus (GO:0071427)	59/100	2.17414e-12	2.70601e-10	0	0	2.28594	61.3874	NUP107;NXT1;EIF4A3;RBMX2;MAGOH;UPF2;EIF5A;NCBP1;NUP133;NCBP2;THOC1;THOC3;THOC2;THOC5;CDC40;THOC7;SRRM1;WDR33;NUP93;DDX19A;DDX19B;SARNP;ZC3H11A;NUP50;SRSF3;NUP54;NUP98;SRSF5;SRSF7;SLU7;FYTTD1;SLBP;NUP205;POM121;SEH1L;RBM8A;SRSF1;U2AF1;NUP160;FIP1L1;NUP85;TPR;DHX38;NUP88;NUP43;EIF4E;SRSF10;RANBP2;NUP155;CPSF3;CPSF2;UPF3B;NUP153;MAGOHB;HNRNPA2B1;NUP35;RNPS1;NUPL2;NUP37
nucleotide-excision repair (GO:0006289)	62/108	3.23628e-12	3.93208e-10	0	0	2.22423	58.8456	ISY1;CCNH;CETN2;BRCA2;SUMO1;SUMO3;SUMO2;POLE;HMGN1;RFC5;USP7;AQR;RFC3;RFC4;LIG1;RFC1;PARP1;RFC2;USP45;HUS1;LIG4;LIG3;CHD1L;RAD23B;SIRT1;RBX1;DDB1;UBE2V2;PPIE;PCNA;XPC;POLD3;ATXN3;POLR2A;POLR2B;RBBP8;POLR2F;POLR2G;POLR2H;RPS27A;POLR2J;POLR2K;UBE2I;RPA1;RPA2;GTF2H1;GTF2H2;GTF2H5;COPS4;CUL4A;COPS3;COPS5;COPS2;RPA3;ERCC1;UBE2N;ERCC8;TCEA1;ERCC5;ERCC6;MNAT1;CUL4B
DNA-templated transcription, elongation (GO:0006354)	62/108	3.23628e-12	3.84063e-10	0	0	2.22423	58.8456	CCNK;SETD2;CCNH;GTF2B;AFF4;CDC73;UBTF;SUPT16H;PBRM1;TBP;NCBP1;NCBP2;CD3EAP;GTF2F1;GTF2F2;POLR1A;POLR1B;POLR1C;POLR1E;GTF2A2;CTR9;TAF9;SUPT4H1;WDR61;RTF1;MLLT3;SUPT6H;GTF2E1;GTF2E2;IWS1;TAF1D;TAF1B;POLR2A;POLR2B;TWISTNB;TAF1A;LEO1;POLR2F;POLR2G;POLR2H;POLR2J;POLR2K;TAF15;TAF12;TAF13;EAF1;TAF11;ELP2;GTF2H1;ELP3;ELP4;SSRP1;GTF2H2;GTF2H5;TCEA1;TAF7;CDK12;TAF5;MNAT1;TAF3;TAF2;TAF1
mRNA transport (GO:0051028)	60/104	5.39628e-12	6.25846e-10	0	0	2.23527	57.9948	NUP107;NXT1;FMR1;EIF4A3;RBMX2;MAGOH;UPF2;EIF5A;NCBP1;NUP133;NCBP2;THOC1;THOC3;THOC2;THOC5;CDC40;THOC7;SRRM1;WDR33;NUP93;DDX19A;DDX19B;SARNP;ZC3H11A;NUP50;SRSF3;NUP54;NUP98;SRSF5;SRSF7;SLU7;FYTTD1;SLBP;NUP205;POM121;SEH1L;RBM8A;SRSF1;U2AF1;NUP160;FIP1L1;NUP85;TPR;DHX38;NUP88;NUP43;EIF4E;SRSF10;RANBP2;NUP155;CPSF3;CPSF2;UPF3B;NUP153;MAGOHB;HNRNPA2B1;NUP35;RNPS1;NUPL2;NUP37
mitotic nuclear division (GO:0140014)	47/74	9.39213e-12	1.06507e-09	0	0	2.46081	62.4828	CEP57;MIS12;BCCIP;XIAP;CDCA8;KIF11;SMC4;NSL1;EPS8;HIRA;DSN1;SPAST;KIF3B;CHEK2;NUSAP1;MYBL2;CEP192;PIBF1;CLASP1;SPAG5;UBE2C;NDE1;PLK1;SPICE1;KLHL22;SMC1A;TUBG1;RHOA;ZWINT;RAB11A;MZT1;NDC80;TPX2;KIF18A;KIF18B;ESPL1;KIF2A;CEP57L1;KIFC1;UBE2S;PPP2R2D;TUBGCP5;CHMP2A;BIRC5;TUBGCP3;KPNB1;RAN
mRNA export from nucleus (GO:0006406)	60/105	9.43201e-12	1.04634e-09	0	0	2.21398	56.2061	NUP107;NXT1;EIF4A3;RBMX2;MAGOH;UPF2;EIF5A;NCBP1;NUP133;NCBP2;THOC1;THOC3;THOC2;THOC5;CDC40;THOC7;SRRM1;WDR33;NUP93;DDX19A;DDX19B;SARNP;ZC3H11A;NUP50;SRSF3;NUP54;NUP98;SRSF5;SRSF7;SLU7;FYTTD1;SLBP;NUP205;POM121;ENY2;SEH1L;RBM8A;SRSF1;U2AF1;NUP160;FIP1L1;NUP85;TPR;DHX38;NUP88;NUP43;EIF4E;SRSF10;RANBP2;NUP155;CPSF3;CPSF2;UPF3B;NUP153;MAGOHB;HNRNPA2B1;NUP35;RNPS1;NUPL2;NUP37
regulation of mRNA stability (GO:0043488)	69/128	1.12141e-11	1.21757e-09	0	0	2.08858	52.6611	FASTKD1;YWHAB;FMR1;HNRNPU;ELAVL1;PSMD9;PSMD6;METTL14;PSMD7;XPO1;PSMD5;PSMD2;PSMD1;TNPO1;DIS3;RC3H1;PRKCA;YWHAZ;PSMA5;PSMA6;PSMA3;PSMA4;XRN1;PSMA1;THRAP3;PSMA2;PSME4;PSME1;PSME2;PABPC1;DCP2;PSMD10;PSMD12;SET;PSMD11;ANP32A;PSMD14;PARN;GIGYF2;PSMA7;FXR1;EXOSC7;LARP1;EXOSC9;EXOSC8;PSMB1;E2F1;IGF2BP1;IGF2BP2;EXOSC3;RPS27A;ZC3H14;EXOSC2;EXOSC1;PAIP1;HSPA8;NPM1;YTHDF2;YTHDF3;PUM2;PSMC5;PSMC6;GDNF;PSMC3;…
maturation of SSU-rRNA from tricistronic rRNA transcript (SSU-rRNA, 5.8S rRNA, LSU-rRNA) (GO:0000462)	28/35	2.93608e-11	3.12142e-09	0	0	3.09957	75.1689	MRPS11;UTP23;HEATR1;FCF1;KRI1;PWP2;WDR46;RPS14;EMG1;RPS16;RPS19;PDCD11;BMS1;RRS1;UTP20;DCAF13;NOP14;UTP6;RPS8;UTP3;KRR1;NGDN;UTP18;MRPS9;TSR2;TSR1;NOL10;RPS24
spliceosomal snRNP assembly (GO:0000387)	29/37	3.2508e-11	3.38548e-09	0	0	3.03674	73.336	DDX20;PRPF8;SART1;SART3;SNRPD2;SNRPD1;TGS1;SNRPD3;SMN1;SRSF10;SRSF12;PRMT5;PRMT7;SNUPN;WDR77;PRPF6;CLNS1A;PRPF3;SNRPG;GEMIN4;CD2BP2;GEMIN5;STRAP;PRPF31;GEMIN6;SNRPE;SNRPF;GEMIN8;RBM22
double-strand break repair (GO:0006302)	73/141	3.68272e-11	3.75859e-09	0	0	2.00593	48.192	DCLRE1B;DCLRE1A;MDC1;FEN1;SMC5;NUCKS1;BRCA1;BRCA2;INSL6;NIPBL;EME1;SUMO1;CHEK2;UIMC1;SMARCAD1;POLK;GEN1;PARP1;NSMCE2;RECQL;HUS1;LIG4;LIG3;PARP9;RNF168;MORF4L1;MMS22L;RAD51C;MSH2;UBE2V2;DNA2;VCP;BLM;PSMD14;PRKDC;CDCA5;DDX1;RNF8;BRCC3;RAD54B;RAD51AP1;RECQL4;BRIP1;WRN;RNF138;RAD21;RBBP8;BARD1;XRCC6;HELQ;XRCC4;KDM4D;EYA1;XRCC5;XRCC2;RPA1;RPA2;MND1;PALB2;SETX;POLA1;RAD50;RAD51;TDP2;ARTN;TDP1;RPA3;ERCC…
DNA-dependent DNA replication (GO:0006261)	38/56	4.84233e-11	4.84518e-09	0	0	2.6291	62.4439	PRIM2;PRIM1;MCM10;POLB;ORC5;ORC4;HELB;ORC6;CDC45;ORC1;ORC3;ORC2;REV3L;TOPBP1;POLK;POLE;RFC5;GINS1;WDHD1;GINS2;RFC3;RFC4;RFC1;RFC2;GINS3;GINS4;HMGA1;RPA1;CDC7;BAZ1A;POLE4;POLA1;POLA2;RAD51;POLE2;POLE3;DNA2;MCM2
regulation of cell cycle G2/M phase transition (GO:1902749)	50/84	6.54594e-11	6.42383e-09	0	0	2.30623	54.0802	YWHAE;CEP57;CETN2;CEP164;KIF14;CEP250;NEK2;CEP290;GTSE1;NINL;CDK5RAP2;OFD1;HSP90AA1;CEP135;HAUS4;HAUS3;CSNK1D;HAUS6;DYNLL1;TUBG1;CKAP5;HAUS2;HAUS1;AKAP9;MAPRE1;PAFAH1B1;SDCCAG8;DYNC1I2;HMMR;AURKA;HAUS8;CEP70;CEP192;CEP76;CLASP1;CEP78;PLK4;NPM1;NDE1;CEP152;PLK1;TPX2;NEDD1;CENPF;CDK6;CENPJ;CDK2;ALMS1;CDK1;FGFR1OP
protein modification by small protein removal (GO:0070646)	114/261	2.33223e-10	2.24554e-08	0	0	1.6923	37.5335	TOMM20;CDC20;PSMD9;PSMD6;PSMD7;PSMD5;MYC;PSMD2;RUVBL1;PSMD1;TRIM25;SKP2;USP8;USP7;CDC25A;RNF128;PSME4;PSME1;PSME2;STAM2;PSMD10;VCP;PSMD12;PSMD11;PSMD14;TNKS;BRCC3;HIF1A;ATXN3;VCPIP1;RHOT1;RIPK1;CLSPN;BARD1;SMAD2;SMAD3;SMURF2;STAM;COPS4;CYLD;COPS3;COPS5;COPS2;MDM2;CDK1;USP36;USP37;WDR48;USPL1;USP38;USP31;USP32;USP33;USP34;PTEN;OTUD7B;TNFAIP3;BRCA1;MYSM1;POLB;SENP6;SENP5;OTUD6B;SENP8;UIMC1;IKBKG;US…
anaphase-promoting complex-dependent catabolic process (GO:0031145)	47/79	2.49345e-10	2.35631e-08	0	0	2.30506	50.97	PSMD10;PSMD12;PSMD11;PSMD14;CUL3;BUB1B;AURKB;PSMA7;ANAPC10;AURKA;CDC20;PSMD9;PSMD6;CCNB1;PSMD7;CDC23;PTTG1;PSMD5;PSMD2;CDC27;PSMB1;PSMD1;SKP2;RPS27A;UBE2C;PLK1;UBE2E1;PSMA5;PSMA6;PSMA3;PSMC5;PSMA4;PSMC6;PSMA1;PSMC3;PSMA2;UBE2S;PSMC1;PSME4;PSMC2;CDC16;PSME1;CDK1;ANAPC4;PSME2;ANAPC1;MAD2L1
DNA synthesis involved in DNA repair (GO:0000731)	41/65	2.70774e-10	2.51229e-08	0	0	2.44389	53.8384	VCP;BLM;PCNA;USP10;BRCA1;BRCA2;RAD51AP1;POLD3;BRIP1;WRN;EXO1;RBBP8;TRIM25;POLI;RPS27A;POLE;POLH;RFC5;BARD1;RFC3;RFC4;RFC1;RFC2;RMI1;USP43;XRCC2;REV1;RPA1;RPA2;ISG15;SIRT1;PALB2;POLA1;RAD50;RAD51C;RAD51;ARTN;RPA3;ATM;DNA2;DTL
negative regulation of ubiquitin protein ligase activity (GO:1904667)	46/77	3.17876e-10	2.89664e-08	0	0	2.31462	50.6192	PSMD10;RPL5;PSMD12;PSMD11;PSMD14;RPL11;BUB1B;PSMA7;ANAPC10;CDC20;PSMD9;PSMD6;CCNB1;PSMD7;CDC23;PSMD5;PSMD2;CDC27;PSMB1;PSMD1;FBXO5;RPS27A;RPS7;UBE2C;RPL23;USP44;UBE2E1;PSMA5;PSMA6;PSMA3;PSMC5;PSMA4;PSMC6;PSMA1;PSMC3;PSMA2;PSMC1;PSMC2;CDC16;CDK2;PSME1;CDK1;ANAPC4;PSME2;ANAPC1;MAD2L1
ribosomal large subunit biogenesis (GO:0042273)	40/63	3.34e-10	2.99018e-08	0	0	2.45998	53.6764	RPL5;RPL3;RPL10;NIP7;RPL12;RPL11;NOP2;MAK16;SDAD1;RPF2;RPL6;RPL7;RPF1;MRPL11;RPL7A;MRPL1;PES1;RPL14;RRS1;SURF6;HEATR3;BRIX1;RRP15;MDN1;NPM1;NOP16;WDR74;RPL35A;RPL23A;WDR12;WDR55;RSL1D1;NSA2;EBNA1BP2;LAS1L;MRTO4;NHP2;RPL24;RPL26;RSL24D1
regulation of telomerase RNA localization to Cajal body (GO:1904872)	17/18	1.33685e-09	1.1762e-07	0	0	3.65922	74.7686	CCT3;CCT2;PARN;CCT6A;EXOSC10;SHQ1;DKC1;RUVBL2;TCP1;RUVBL1;NHP2;NAF1;CCT8;CCT7;CCT5;DCP2;CCT4
ubiquitin-dependent protein catabolic process (GO:0006511)	138/341	1.78673e-09	1.54537e-07	0	0	1.56797	31.5834	UBE3C;UBXN2A;UBE2D2;UBE2D3;LTN1;BUB1B;FBXO22;CDC20;PSMD9;RNF115;PSMD6;NUB1;PSMD7;CDC23;PSMD5;PSMD2;RNF19A;CDC27;PSMD1;TRIM25;GTSE1;UBE2E1;UBE4A;UBE4B;FBXO11;RBX1;TOM1L1;RNF128;TBL1XR1;DDIT3;PSME4;PSME1;PSME2;PLAA;ANAPC4;SQSTM1;ANAPC1;PSMD10;VCP;PSMD12;TSG101;PSMD11;CUL5;PSMD14;UBA6;CUL3;CUL2;CUL1;KLHL11;FBXO45;ANAPC10;ATXN3;BTBD3;RNF217;PCBP2;UBR5;HACE1;UBE2I;UBE2B;SMURF2;UBE2C;UBE2A;KLHL20;UBE2W…
transcription elongation from RNA polymerase II promoter (GO:0006368)	52/95	1.83217e-09	1.55826e-07	0	0	2.12076	42.665	CCNK;SETD2;CCNH;GTF2B;AFF4;CDC73;SUPT16H;PBRM1;TBP;NCBP1;NCBP2;GTF2F1;GTF2F2;GTF2A2;TAF9;CTR9;SUPT4H1;WDR61;RTF1;MLLT3;SUPT6H;GTF2E1;IWS1;GTF2E2;POLR2A;POLR2B;LEO1;POLR2F;POLR2G;POLR2H;POLR2J;POLR2K;TAF15;TAF12;TAF13;EAF1;TAF11;ELP2;GTF2H1;ELP3;ELP4;SSRP1;GTF2H2;GTF2H5;TCEA1;TAF7;CDK12;TAF5;MNAT1;TAF3;TAF2;TAF1
transcription from RNA polymerase II promoter (GO:0006366)	184/485	1.89594e-09	1.58607e-07	0	0	1.4699	29.5208	TCERG1;CCNK;CCNH;GTF2B;EIF4A3;ARID4A;PHAX;CCNC;HSF2BP;TTF2;RBPJ;CTGF;CCND1;PTTG1;MAGOH;PAPOLA;SNRPD3;GTF2I;SUPT16H;MED8;THOC1;THOC3;THOC2;MED4;GTF2F1;THOC5;GTF2F2;MED6;THOC7;CDC40;MED7;SRRM1;SARNP;ZC3H11A;DDIT3;SNRPG;TBPL1;SRSF3;SNRPE;SNRPF;SRSF5;SRSF7;ATF4;SLBP;DDX5;CBFB;RBM8A;MAX;CSTF3;CTR9;CSTF2;GLIS3;SUPT4H1;WDR61;GATA4;RTF1;HIF1A;GTF2E1;RPAP2;SUPT6H;PMF1;GTF2E2;TAF5L;CCNB1;MED31;DVL2;DHX38;N…
termination of RNA polymerase II transcription (GO:0006369)	41/68	1.96256e-09	1.61531e-07	0	0	2.33608	46.836	SLBP;RBM8A;CSTF3;EIF4A3;SRSF1;CSTF2;CSTF2T;U2AF1;TTF2;MED18;FIP1L1;PCF11;MAGOH;PAPOLA;DHX38;SNRPD3;CPSF7;NCBP1;NCBP2;CPSF3;CPSF2;THOC1;UPF3B;THOC3;THOC2;THOC5;MAGOHB;CDC40;THOC7;SRRM1;WDR33;SARNP;ZC3H11A;SNRPG;SRSF3;SNRPE;RNPS1;SNRPF;SRSF5;SLU7;SRSF7
protein deubiquitination (GO:0016579)	110/257	1.97732e-09	1.60163e-07	0	0	1.65833	33.2355	OTUD4;TOMM20;CDC20;PSMD9;PSMD6;PSMD7;PSMD5;MYC;PSMD2;RUVBL1;PSMD1;TRIM25;SKP2;USP8;USP7;CDC25A;RNF128;PSME4;PSME1;PSME2;STAM2;PSMD10;VCP;ENY2;PSMD12;PSMD11;PSMD14;SHMT2;TNKS;BRCC3;HIF1A;ATXN3;VCPIP1;RHOT1;RIPK1;CLSPN;BARD1;SMAD2;SMAD3;SMURF2;STAM;CYLD;COPS5;MDM2;CDK1;USP36;USP37;WDR48;USP38;USP31;USP32;USP33;USP34;PTEN;OTUD7B;TNFAIP3;BRCA1;MYSM1;POLB;OTUD6B;SENP8;UIMC1;IKBKG;USP46;USP47;USP42;USP…
RNA 3'-end processing (GO:0031123)	38/61	2.04459e-09	1.63024e-07	0	0	2.4136	48.2915	ZCCHC11;ZCCHC6;RBM8A;CSTF3;EIF4A3;SRSF1;CSTF2;CSTF2T;U2AF1;FIP1L1;PCF11;MAGOH;PAPOLA;DHX38;CPSF7;PNPT1;NCBP1;NCBP2;CPSF3;CPSF2;THOC1;UPF3B;THOC3;THOC2;THOC5;MAGOHB;CDC40;THOC7;SRRM1;WDR33;SUPV3L1;SARNP;ZC3H11A;SRSF3;RNPS1;SRSF5;SLU7;SRSF7
transcription-coupled nucleotide-excision repair (GO:0006283)	43/73	2.21543e-09	1.73928e-07	0	0	2.28222	45.4797	ISY1;PCNA;CCNH;POLD3;POLR2A;POLR2B;POLR2F;POLR2G;POLR2H;RPS27A;POLR2J;POLR2K;HMGN1;RFC5;USP7;RFC3;AQR;RFC4;LIG1;RFC1;RFC2;RPA1;RPA2;LIG3;GTF2H1;GTF2H2;GTF2H5;RBX1;DDB1;COPS4;CUL4A;COPS3;COPS5;COPS2;RPA3;ERCC1;PPIE;ERCC8;TCEA1;ERCC5;ERCC6;MNAT1;CUL4B
regulation of signal transduction by p53 class mediator (GO:1901796)	68/138	2.6234e-09	2.02837e-07	0	0	1.90916	37.7227	RPL5;PHF20;CHD4;BRCA1;ING5;EXO1;CHEK2;CHEK1;TOPBP1;CDK5RAP3;RFC5;PRMT5;SUPT16H;RFC3;RFC4;TBP;CSNK2A1;RFC2;RMI1;RPL23;CSNK2A2;HUS1;DNA2;BLM;PRKAA1;HDAC2;HDAC1;NOP2;RPL11;TAF9;RPF2;AURKB;AURKA;NUAK1;BRIP1;WRN;RBBP4;SMYD2;RRS1;RBBP8;RBBP7;MTA2;RPS27A;BRD7;BARD1;TAF15;TAF12;TAF13;TAF11;RPA1;RPA2;SSRP1;POU4F1;TPX2;RAD50;ARTN;RPA3;JMY;CDK2;MDM2;RAD17;TAF7;ATM;TAF5;TAF3;TAF2;ATR;TAF1
ciliary basal body-plasma membrane docking (GO:0097711)	52/96	2.99757e-09	2.28307e-07	0	0	2.09867	41.1874	YWHAE;CEP57;CETN2;CEP164;CEP250;NEK2;CEP97;CC2D2A;CEP290;NINL;CDK5RAP2;IQCB1;OFD1;HSP90AA1;CEP135;HAUS4;KIF24;HAUS3;CSNK1D;HAUS6;RPGRIP1L;TUBG1;DYNLL1;CKAP5;HAUS2;HAUS1;AKAP9;MAPRE1;PAFAH1B1;SDCCAG8;DYNC1I2;FBF1;TTBK2;HAUS8;NPHP1;CEP70;CEP192;CEP76;CLASP1;CEP78;PLK4;NDE1;CEP152;PLK1;SCLT1;RAB11A;AHI1;NEDD1;CENPJ;ALMS1;CDK1;FGFR1OP
nucleocytoplasmic transport (GO:0006913)	31/46	3.84775e-09	2.88751e-07	0	0	2.61105	50.5912	NUP205;SET;NXT1;ANP32A;DDX20;PHAX;NXT2;XPO1;SNRPD2;RSRC1;SNRPD1;SNRPD3;SMN1;HNRNPA1;HTATIP2;EIF5A;NPM1;NCBP1;NCBP2;SNUPN;LSG1;MYBBP1A;ANP32E;SNRPG;GEMIN4;GEMIN5;GEMIN6;SNRPE;NUP98;SNRPF;GEMIN8
DNA recombination (GO:0006310)	35/55	3.89227e-09	2.87859e-07	0	0	2.46557	47.744	RTEL1;BLM;HMGB3;NUCKS1;HMGB1;BRCA1;BRCA2;RBPJ;RAD54B;RAD51AP1;RECQL4;BRIP1;WRN;EXO1;RAD21;RBBP8;RAD54L;GEN1;BARD1;RMI1;XRCC2;ATRX;RECQL;RPA1;LIG4;PALB2;TSN;SUPV3L1;RAD50;RAD51C;RAD51;ARTN;ERCC1;ATM;DNA2
mRNA 3'-end processing (GO:0031124)	43/74	3.96953e-09	2.89379e-07	0	0	2.25138	43.5521	SLBP;RBM8A;CSTF3;EIF4A3;SRSF1;CSTF2;CSTF2T;U2AF1;CDC73;FIP1L1;PCF11;PAPOLG;MAGOH;PAPOLA;LEO1;DHX38;MTPAP;CPSF7;CPSF6;NCBP1;NCBP2;CPSF3;CPSF2;THOC1;UPF3B;THOC3;THOC2;THOC5;MAGOHB;CDC40;THOC7;SRRM1;WDR33;SARNP;ZC3H11A;SRSF3;TUT1;RNPS1;PABPC1;SRSF5;GRSF1;SLU7;SRSF7
ribosomal small subunit biogenesis (GO:0042274)	30/44	4.49321e-09	3.22941e-07	0	0	2.64168	50.775	LTV1;WDR3;MRPS11;RPS27L;PWP2;RPS15;RPS14;EMG1;RPS17;RPS16;NOB1;RPS19;SURF6;RIOK2;RIOK1;RPS10;UTP14A;NOM1;NOP14;NPM1;RPS7;RPS6;MRPS7;RPS28;LSM6;RPS27;MPHOSPH10;SRFBP1;NOL11;RPS24
regulation of ubiquitin-protein ligase activity involved in mitotic cell cycle (GO:0051439)	42/72	5.11456e-09	3.62494e-07	0	0	2.26011	43.1481	PSMD10;PSMD12;PSMD11;PSMD14;BUB1B;PSMA7;ANAPC10;CDC20;PSMD9;PSMD6;CCNB1;PSMD7;CDC23;PSMD5;PSMD2;CDC27;PSMB1;PSMD1;FBXO5;RPS27A;UBE2C;PLK1;UBE2E1;PSMA5;PSMA6;PSMA3;PSMC5;PSMA4;PSMC6;PSMA1;PSMC3;PSMA2;PSMC1;PSMC2;CDC16;CDK2;PSME1;CDK1;ANAPC4;PSME2;ANAPC1;MAD2L1
positive regulation of protein ubiquitination involved in ubiquitin-dependent protein catabolic process (GO:2000060)	48/87	5.38263e-09	3.76268e-07	0	0	2.13764	40.7008	PSMD10;PSMD12;PSMD11;PSMD14;PTEN;CUL1;BUB1B;PSMA7;ANAPC10;CDC20;PSMD9;PSMD6;CCNB1;PSMD7;CDC23;RNF139;PSMD5;PSMD2;CDC27;PSMB1;PSMD1;FBXO5;RPS27A;FBXW7;UBE2C;PLK1;AXIN1;UBE2E1;PTK2;PSMA5;PSMA6;PSMA3;PSMC5;PSMA4;PSMC6;PSMA1;PSMC3;PSMA2;PSMC1;PSME4;PSMC2;CDC16;PSME1;CDK1;ANAPC4;PSME2;ANAPC1;MAD2L1
positive regulation of ubiquitin protein ligase activity (GO:1904668)	46/82	5.46931e-09	3.77161e-07	0	0	2.17348	41.3486	PSMD10;PSMD12;PSMD11;PSMD14;PTEN;CUL1;BUB1B;PSMA7;ANAPC10;CDC14B;CDC20;PSMD9;PSMD6;CCNB1;PSMD7;CDC23;PSMD5;PSMD2;CDC27;PSMB1;PSMD1;FBXO5;RPS27A;UBE2C;PLK1;UBE2E1;PSMA5;PSMA6;PSMA3;PSMC5;PSMA4;PSMC6;PSMA1;PSMC3;PSMA2;UBE2S;PSMC1;PSME4;PSMC2;CDC16;PSME1;CDK1;ANAPC4;PSME2;ANAPC1;MAD2L1
proteasome-mediated ubiquitin-dependent protein catabolic process (GO:0043161)	120/291	5.50344e-09	3.74454e-07	0	0	1.59772	30.3852	UBXN2A;CCNF;UBE2D3;LTN1;BUB1B;CDC20;PSMD9;RNF115;PSMD6;PSMD7;CDC23;PTTG1;PSMD5;PSMD2;CDC27;PSMD1;SKP2;GTSE1;FBXW7;FBXO2;UBE2E1;UBE4A;UBE4B;RBX1;TBL1XR1;DDIT3;PSME4;PSME1;PSME2;PLAA;ANAPC4;ANAPC1;PSMD10;VCP;PSMD12;PSMD11;PSMD14;CUL3;CUL1;KLHL11;UBR2;FBXO45;UBR1;ANAPC10;UBE2J1;HSP90B1;ATXN3;CCNB1;BTBD3;PCBP2;UBE2B;HSPA5;SMURF2;UBE2C;PLK1;ERLIN1;ERLIN2;UBE2A;MARCH6;KLHL20;UBE2W;NSFL1C;UBE2S;CDC16;DN…
DNA replication initiation (GO:0006270)	20/24	5.78526e-09	3.8845e-07	0	0	3.22872	61.2423	PRIM2;PRIM1;GINS4;CDC7;MCM10;POLE4;ORC5;POLA1;ORC4;POLA2;ORC6;CDC45;ORC1;POLE2;ORC3;POLE3;ORC2;TOPBP1;POLE;MCM2
tRNA aminoacylation (GO:0043039)	28/40	5.89252e-09	3.90513e-07	0	0	2.71213	51.3937	CARS;TARSL2;TARS;EPRS;NARS;LARS;RARS;HARS;YARS;DARS;WARS;GATC;SARS;DARS2;WARS2;AIMP1;AIMP2;LARS2;KARS;PPA1;MARS;GARS;TARS2;IARS;FARSA;EEF1E1;FARSB;AARS
chromosome organization (GO:0051276)	35/56	7.80144e-09	5.10394e-07	0	0	2.42154	45.2077	TOP2A;TOP2B;HDAC2;CETN2;CDCA8;XPC;BRCA2;MYC;NUF2;RPS27A;CENPT;CDT1;CENPW;NUP133;PARP1;NUP155;H3F3A;LIG4;HMGA2;RAD23B;SIRT1;NDC80;RBX1;MSH6;DDB1;LATS1;COPS4;CUL4A;COPS3;COPS5;MSH2;CENPH;MSH3;COPS2;CUL4B
sister chromatid segregation (GO:0000819)	24/32	8.02151e-09	5.18149e-07	0	0	2.90585	54.1684	TOP2A;CEP57;TOP2B;SPAG5;MIS12;PLK1;CDCA8;KLHL22;SMC1A;TUBG1;SMC4;NSL1;ZWINT;NDC80;LATS1;HIRA;DSN1;KIF18A;KIF18B;ESPL1;CEP57L1;KIFC1;NUSAP1;RAN
protein sumoylation (GO:0016925)	40/68	8.45561e-09	5.39362e-07	0	0	2.2791	42.3649	TOP2A;TOP2B;NUP205;POM121;NUP107;PCNA;SEH1L;CDCA8;NUP160;AURKB;SENP5;SUMO1;NUP85;SUMO3;SUMO2;TPR;NUP43;NUP88;RANBP2;UBE2I;NUP133;EYA1;NUP155;NUP153;SENP2;RANGAP1;TOPORS;NUP93;INCENP;NUP50;SP3;BIRC5;NUP35;UBA2;NUP54;NUP98;TOP1;NUPL2;SAE1;NUP37
negative regulation of ubiquitin-protein ligase activity involved in mitotic cell cycle (GO:0051436)	41/71	1.16957e-08	7.36827e-07	0	0	2.23737	40.8634	PSMD10;PSMD12;PSMD11;PSMD14;BUB1B;PSMA7;ANAPC10;CDC20;PSMD9;PSMD6;CCNB1;CDC23;PSMD7;PSMD5;PSMD2;CDC27;PSMB1;PSMD1;FBXO5;RPS27A;UBE2C;UBE2E1;PSMA5;PSMA6;PSMA3;PSMC5;PSMA4;PSMC6;PSMA1;PSMC3;PSMA2;PSMC1;CDC16;PSMC2;CDK2;PSME1;CDK1;ANAPC4;PSME2;ANAPC1;MAD2L1
mitotic metaphase plate congression (GO:0007080)	29/43	1.19822e-08	7.45675e-07	0	0	2.61301	47.6609	BECN1;SEH1L;CDCA5;VPS4B;CUL3;PINX1;MIS12;KIF14;CDCA8;CCNB1;CDC23;CHMP1B;NUF2;RRS1;PIBF1;CDT1;KIF22;RAB11A;NDC80;CENPE;KIF18A;KIFC1;CHMP2B;CHMP4C;CHMP2A;KIF2C;KPNB1;MAD1L1;CHMP5
positive regulation of ubiquitin-protein ligase activity involved in regulation of mitotic cell cycle transition (GO:0051437)	43/76	1.20746e-08	7.42367e-07	0	0	2.19213	39.9673	PSMD10;PSMD12;PSMD11;PSMD14;CUL1;BUB1B;PSMA7;ANAPC10;CDC20;PSMD9;PSMD6;CCNB1;PSMD7;CDC23;PSMD5;PSMD2;CDC27;PSMB1;PSMD1;FBXO5;RPS27A;UBE2C;PLK1;UBE2E1;PSMA5;PSMA6;PSMA3;PSMC5;PSMA4;PSMC6;PSMA1;PSMC3;PSMA2;PSMC1;PSME4;PSMC2;CDC16;PSME1;CDK1;ANAPC4;PSME2;ANAPC1;MAD2L1
DNA duplex unwinding (GO:0032508)	28/41	1.39936e-08	8.50113e-07	0	0	2.64598	47.8516	PIF1;BLM;RTEL1;DHX9;CETN2;DDX1;XPC;RECQL4;WRN;ASCC3;RPS27A;PARP1;DDX11;RECQL;HMGA1;GTF2H1;CHD1L;GTF2H2;RAD23B;GTF2H5;RBX1;SUPV3L1;CUL4A;DDB1;RAD50;RAD51;ARTN;CUL4B
mitotic spindle organization (GO:0007052)	42/74	1.57007e-08	9.42597e-07	0	0	2.19902	39.5155	GPSM2;TNKS;BCCIP;XIAP;TTK;KIF11;AURKB;AURKA;MECP2;CCNB1;SPAST;KIF3B;CHEK2;NUF2;STMN1;RCC1;MYBL2;CEP192;PIBF1;CLASP1;STIL;PLK2;SPICE1;KIF23;TUBG1;RHOA;MZT1;RAB11A;NDC80;CENPE;TPX2;KIF2A;KIFC1;PRC1;TBCE;SBDS;TUBGCP5;BIRC5;TUBGCP3;KPNB1;RAN;SPC25
nuclear export (GO:0051168)	49/92	1.76722e-08	1.04862e-06	0	0	2.06357	36.8374	NXT1;CSE1L;EIF4A3;PHAX;XPO1;XPO4;MAGOH;CHORDC1;XPO5;CCHCR1;EIF5A;NCBP1;NUP133;NCBP2;THOC1;THOC3;THOC2;THOC5;CDC40;THOC7;SRRM1;LSG1;SARNP;ZC3H11A;SRSF3;NUP98;SRSF5;SLU7;SRSF7;POM121;RBM8A;SRSF1;U2AF1;TPR;DHX38;NUP88;HNRNPA1;EIF4E;RANBP2;RANBP1;NUP155;UPF3B;XPO7;NUP153;MAGOHB;RNPS1;CALR;NUPL2;RAN
microtubule cytoskeleton organization involved in mitosis (GO:1902850)	29/44	2.64612e-08	1.55209e-06	0	0	2.55363	44.5546	GPSM2;SETD2;TNKS;BCCIP;TTK;KIF11;AURKB;AURKA;MECP2;CCNB1;KIF3B;NUF2;STMN1;NUSAP1;RCC1;CLASP1;STIL;PLK2;TUBG1;NDC80;CENPE;KIF2A;ESPL1;TBCE;TACC3;SBDS;KPNB1;RAN;SPC25
metaphase plate congression (GO:0051310)	29/44	2.64612e-08	1.53445e-06	0	0	2.55363	44.5546	BECN1;SEH1L;CDCA5;VPS4B;CUL3;PINX1;KIF14;CDCA8;CCNB1;CDC23;CHMP1B;RRS1;FAM83D;PIBF1;SPICE1;KIF22;RAB11A;NDC80;CENPE;CENPF;KIF18A;KIFC1;CHMP2B;CHMP4C;CHMP2A;KIF2C;CENPQ;KPNB1;CHMP5
regulation of telomere maintenance via telomerase (GO:0032210)	32/51	2.9817e-08	1.70962e-06	0	0	2.43104	42.1255	PIF1;TNKS;PINX1;PARN;HNRNPU;AURKB;EXOSC10;TNKS2;MAPK1;NEK2;CCT8;CCT7;HNRNPA1;CCT5;CCT4;CCT3;CCT2;XRCC5;TINF2;NEK7;TERF1;TERF2;CCT6A;GNL3L;XRN1;PAPD5;TCP1;NAF1;ATM;HNRNPC;DCP2;ATR
centromere complex assembly (GO:0034508)	25/36	5.02682e-08	2.85021e-06	0	0	2.6906	45.218	MIS12;HJURP;RSF1;CENPA;RBBP4;RUVBL1;POGZ;OIP5;RBBP7;CENPT;HELLS;NPM1;CENPW;SMARCA5;CENPE;CENPF;NASP;CENPH;CENPI;CENPK;CENPL;CENPN;CENPP;CENPQ;ITGB3BP
negative regulation of cell cycle G2/M phase transition (GO:1902750)	39/69	5.93546e-08	3.32842e-06	0	0	2.18992	36.4396	PSMD10;PSMD12;PSMD11;PSMD14;PINX1;CUL1;BRCA1;BRCC3;PSMA7;CDC14B;AURKA;PSMD9;PSMD6;PSMD7;PSMD5;PSMD2;CHEK1;UIMC1;PSMB1;PSMD1;RPS27A;USP47;PLK1;RBX1;PSMA5;PSMA6;PSMA3;PSMC5;PSMA4;PSMC6;PSMA1;PSMC3;PSMA2;PSMC1;PSME4;PSMC2;PSME1;PSME2;DTL
positive regulation of telomerase RNA localization to Cajal body (GO:1904874)	14/15	6.54576e-08	3.63076e-06	0	0	3.61617	59.8182	CCT3;CCT2;CCT6A;SHQ1;DKC1;RUVBL2;TCP1;RUVBL1;NHP2;NAF1;CCT8;CCT7;CCT5;CCT4
DNA geometric change (GO:0032392)	19/24	6.8212e-08	3.74286e-06	0	0	3.06729	50.6122	ZRANB3;PIF1;BLM;RTEL1;DHX9;DDX11;DDX1;RECQL;HMGB2;HMGB3;HMGB1;SUPV3L1;RECQL4;RAD50;WRN;ARTN;HNRNPA2B1;DNA2;ASCC3
negative regulation of G2/M transition of mitotic cell cycle (GO:0010972)	36/62	7.44402e-08	4.04116e-06	0	0	2.24969	36.9248	PSMD10;PSMD12;PSMD11;PSMD14;PINX1;CUL1;AURKB;PSMA7;AURKA;PSMD9;PSMD6;PSMD7;PSMD5;PSMD2;PSMB1;PSMD1;RPS27A;CDK5RAP3;USP47;RBX1;PSMA5;PSMA6;PSMA3;PSMC5;PSMA4;PSMC6;PSMA1;PSMC3;PSMA2;PSMC1;PSME4;PSMC2;CHMP4C;PSME1;PSME2;ATM
transcription, DNA-templated (GO:0006351)	137/356	8.11715e-08	4.36019e-06	0	0	1.49102	24.3434	TCERG1;CCNK;CRCP;CCNH;GTF2B;SCX;ARID4A;HSF2BP;TTF2;TTF1;PWP1;PTTG1;GTF2I;SUPT16H;MED4;GTF2F1;ILF2;GTF2F2;THAP1;RRAGC;TBPL1;TFAM;ATF4;DDX5;CBFB;MAX;CTR9;SUPT4H1;GLIS3;WDR61;GATA4;BAZ2B;RTF1;HIF1A;SUPT6H;GTF2E1;PMF1;TAF5L;GTF2E2;DVL2;SMN1;BPTF;BTF3;IVNS1ABP;EAF1;SMARCA5;NFXL1;FOSL1;SETX;NR4A2;TADA2A;COPS5;FUBP3;FUBP1;COPS2;RNPS1;TCF4;MNAT1;KDM5A;BMPR2;RSF1;ASH2L;YBX1;AFF4;CDC73;SNAPC5;TRPS1;UBTF;GA…
regulation of gene silencing by RNA (GO:0060966)	33/55	8.69813e-08	4.6236e-06	0	0	2.32468	37.7937	TRIM71;NUP205;POM121;NUP107;SEH1L;FMR1;NUP160;IPO8;POLR2A;NUP85;POLR2B;TPR;POLR2F;NUP43;NUP88;POLR2G;POLR2H;POLR2J;POLR2K;RANBP2;NUP133;NUP155;H3F3A;NUP153;PUM2;NUP93;NUP50;NUP35;NUP54;NUP98;NUPL2;RAN;NUP37
regulation of posttranscriptional gene silencing (GO:0060147)	33/55	8.69813e-08	4.57593e-06	0	0	2.32468	37.7937	TRIM71;NUP205;POM121;NUP107;SEH1L;FMR1;NUP160;IPO8;POLR2A;NUP85;POLR2B;TPR;POLR2F;NUP43;NUP88;POLR2G;POLR2H;POLR2J;POLR2K;RANBP2;NUP133;NUP155;H3F3A;NUP153;PUM2;NUP93;NUP50;NUP35;NUP54;NUP98;NUPL2;RAN;NUP37
positive regulation of DNA biosynthetic process (GO:2000573)	33/55	8.69813e-08	4.52924e-06	0	0	2.32468	37.7937	HSP90AB1;NVL;TNKS;DSCC1;PARN;CHTF18;AURKB;TNKS2;MYC;MAPK1;NEK2;CCT8;CCT7;HNRNPA1;CCT5;CCT4;RFC5;CCT3;CCT2;HSP90AA1;RFC3;RFC4;RFC2;XRCC5;PTGES3;NEK7;GRHL2;CCT6A;DKC1;TCP1;NAF1;ATM;ATR
nucleic acid metabolic process (GO:0090304)	43/80	9.19134e-08	4.73772e-06	0	0	2.08253	33.742	FEN1;DDX24;DDX1;HNRNPU;HNRNPR;PTBP1;METTL14;NT5E;WRN;POLR2A;ERI1;POLR2B;ERI2;PCBP2;POLR2F;POLR2G;TOPBP1;TK1;POLR2H;KPNA2;HNRNPA1;POLR2J;POLR2K;HNRNPA3;NCBP1;WTAP;NCBP2;LSM1;GTF2F1;GTF2F2;HNRNPL;HNRNPM;RAD50;HNRNPK;HNRNPH1;HNRNPF;XRN2;HNRNPA2B1;HNRNPD;HNRNPH2;DNA2;HNRNPC;RAN
DNA replication-independent nucleosome assembly (GO:0006336)	26/39	9.87375e-08	5.03858e-06	0	0	2.58298	41.6655	HJURP;RSF1;CENPA;HIRA;RBBP4;RUVBL1;OIP5;RBBP7;CENPT;NPM1;CENPW;H3F3A;ATRX;SMARCA5;NASP;CENPH;CENPI;HAT1;CENPK;CENPL;CENPN;CENPP;CENPQ;ASF1A;ITGB3BP;ASF1B
DNA biosynthetic process (GO:0071897)	26/39	9.87375e-08	4.98869e-06	0	0	2.58298	41.6655	BLM;BRCA1;BRCA2;TYMS;RAD51AP1;POLD3;BRIP1;WRN;EXO1;RBBP8;POLE;POLH;BARD1;RFC3;RMI1;XRCC2;PALB2;SIRT1;POLA1;RAD50;RAD51C;RAD51;ARTN;ATM;DNA2;PPIA
tRNA aminoacylation for protein translation (GO:0006418)	29/46	1.14189e-07	5.7128e-06	0	0	2.4426	39.046	CARS;TARSL2;MRPL39;TARS;EPRS;NARS;LARS;RARS;NARS2;HARS;YARS;DARS;WARS;SARS;DARS2;WARS2;AIMP1;AIMP2;LARS2;KARS;PPA1;MARS;GARS;TARS2;IARS;FARSA;EEF1E1;FARSB;AARS
regulation of cellular response to heat (GO:1900034)	42/78	1.20945e-07	5.99207e-06	0	0	2.08625	33.2297	YWHAE;GSK3B;NUP205;CAMK2D;POM121;NUP107;HSP90AB1;SEH1L;NUP160;HSPH1;BAG5;DNAJB6;BAG2;NUP85;CHORDC1;TPR;MAPK1;NUP43;NUP88;RANBP2;HSPA8;HSP90AA1;NUP133;NUP155;PTGES3;RPA1;RPA2;NUP153;SIRT1;NUP93;DNAJC2;DNAJC7;NUP50;RPA3;NUP35;NUP54;ATM;NUP98;FKBP4;NUPL2;ATR;NUP37
tRNA transport (GO:0051031)	24/35	1.36542e-07	6.69973e-06	0	0	2.65678	41.9947	RANBP2;POM121;NUP205;NUP107;SEH1L;SSB;NUP133;NUP155;NUP153;TOMM20;NUP160;NUP93;XPOT;NUP85;NUP50;TPR;NUP35;NUP43;NUP88;NUP54;NUP98;NUPL2;RAN;NUP37
negative regulation of cell cycle process (GO:0010948)	43/81	1.47142e-07	7.15108e-06	0	0	2.05682	32.3576	CCNK;HSP90AB1;MAX;BRCA1;BMI1;SMC3;RNF2;AURKB;HMGN5;CCND1;RBBP4;CHEK1;E2F1;RBBP8;FBXO5;RBBP7;E2F7;E2F8;SUZ12;CDT1;PCGF6;CBX5;RRM2;APAF1;FBXW7;EED;CBX3;RPL23;MGA;CDC7;SMC1A;TOM1L1;TFDP1;RAD51;RYBP;STAG2;NME6;TFDP2;CDK4;CHMP4C;MDM2;CALR;EZH2
tRNA-containing ribonucleoprotein complex export from nucleus (GO:0071431)	23/33	1.57012e-07	7.5588e-06	0	0	2.70039	42.3068	RANBP2;POM121;NUP205;NUP107;SEH1L;SSB;NUP133;NUP155;NUP153;NUP160;NUP93;XPOT;NUP85;NUP50;TPR;NUP35;NUP43;NUP88;NUP54;NUP98;NUPL2;RAN;NUP37
tRNA export from nucleus (GO:0006409)	23/33	1.57012e-07	7.48816e-06	0	0	2.70039	42.3068	RANBP2;POM121;NUP205;NUP107;SEH1L;SSB;NUP133;NUP155;NUP153;NUP160;NUP93;XPOT;NUP85;NUP50;TPR;NUP35;NUP43;NUP88;NUP54;NUP98;NUPL2;RAN;NUP37
nuclear import (GO:0051170)	39/71	1.67922e-07	7.93431e-06	0	0	2.12823	33.1999	IPO11;POM121;NXT1;NUP107;CSE1L;DDX20;NXT2;IPO7;IPO8;SNRPD2;SNRPD1;NUP85;TPR;HEATR3;NUP88;SNRPD3;SMN1;HNRNPA1;TNPO3;HTATIP2;PDIA3;RANBP2;RANBP1;NUP133;NUP155;NUP153;SNUPN;NUP93;NUP50;SNRPG;GEMIN4;GEMIN5;SNRPE;GEMIN6;NUP98;SNRPF;GEMIN8;KPNB1;RAN
cilium assembly (GO:0060271)	114/288	1.79419e-07	8.39977e-06	0	0	1.53364	23.8229	TRAF3IP1;FNBP1L;PTPDC1;CDC14B;CEP250;NEK1;NEK2;CEP97;KIFAP3;CDK5RAP2;DYNC2H1;CEP135;IFT80;CSNK1D;OCRL;RPGRIP1L;IFT88;IFT81;AKAP9;INTU;ARL6;ARL3;FBF1;TTBK2;DYNC2LI1;KIF3B;KIF3A;TTC21B;CEP70;NPHP1;TCTEX1D2;CEP192;KIF3C;CEP76;ATP6V1D;PIBF1;CEP78;PLK4;PLK1;PARVA;BBIP1;TMEM231;AHI1;WDR60;CDK1;FGFR1OP;CEP57;YWHAE;TTC26;LRGUK;CETN2;CEP164;CBY1;SNX10;PTPN23;HSPB11;SEPT8;SEPT7;WDR5;BBS7;TNPO1;IFT57;CC2D2A…
RNA splicing, via transesterification reactions (GO:0000375)	19/25	2.15004e-07	9.97424e-06	0	0	2.9446	45.2072	SF3A3;DBR1;SF3B3;SCAF11;DDX23;LSM1;PRPF8;SRRM1;PRPF4;SNRNP40;PRPF6;TRA2B;PRPF3;MPHOSPH10;SF3B1;SRSF10;SMNDC1;SLU7;BCAS2
protein polyubiquitination (GO:0000209)	112/283	2.31617e-07	1.06481e-05	0	0	1.53336	23.4269	UBE3C;UBE2D2;CCNF;UBE2D3;FBXO22;PSMD9;NPEPPS;RNF115;PSMD6;PSMD7;CDC23;PSMD5;PSMD2;RNF19A;CDC27;PSMD1;SKP2;HERC6;WSB1;FBXW7;FBXO2;UBE2E1;UBE4A;UBE4B;LMO7;FBXO11;RC3H2;RBX1;PSME4;PSME1;UBE2V2;PSME2;ANAPC4;ANAPC1;PSMD10;PSMD12;PSMD11;CBFB;PSMD14;TNKS;CUL3;CUL1;UBR2;ANAPC10;RNF217;UBR5;LONRF1;BARD1;HACE1;UBE2B;SMURF2;UBE2C;LNPEP;UBE2A;MARCH6;MARCH5;FBXO30;KLHL20;UBE2W;UBE2S;UBE2T;CDC16;MKRN1;UBE2N;BC…
protein modification by small protein conjugation (GO:0032446)	148/398	2.94549e-07	1.34204e-05	0	0	1.44076	21.6658	NUP107;UBE3C;UBE2D2;UBE2D3;CCNF;IPP;UBE2Z;HERC4;NUB1;CDK5RAP3;TRIM23;HERC6;USP7;FBXW7;FBXO2;UBE2E1;LMO7;FBXO11;CCNB1IP1;RBX1;NUP93;RRAGA;UBE2V2;NUP98;NUP205;POM121;VCP;SEH1L;DCUN1D5;PRKDC;UBA6;CUL3;UBA5;CUL2;DCUN1D4;CTR9;CUL1;DCUN1D1;CDCA8;WDR61;UBR2;FBXO45;KLHL12;BCL10;UBR1;RTF1;HIF1A;NUP160;VCPIP1;NUP85;TPR;UBR5;HLTF;NUP88;NAE1;BARD1;HACE1;UBE2I;UBE2B;NUP155;SMURF2;UBE2C;PLK1;KLHL22;KLHL23;NUP1…
histone exchange (GO:0043486)	24/36	3.0909e-07	1.39583e-05	0	0	2.58298	38.7179	CENPT;NPM1;CENPW;HJURP;RNF8;SMARCA5;RSF1;SPTY2D1;CENPA;RBBP4;NASP;CENPH;CENPI;RUVBL1;CENPK;CENPL;ANP32E;OIP5;CENPN;RBBP7;ANP32B;CENPP;CENPQ;ITGB3BP
DNA strand elongation involved in DNA replication (GO:0006271)	14/16	3.97951e-07	1.78135e-05	0	0	3.39016	49.9606	GINS1;GINS2;RFC3;PCNA;RFC4;LIG1;PARP1;PARP2;GINS3;GINS4;LIG4;LIG3;POLA1;POLE
spliceosomal complex assembly (GO:0000245)	26/41	4.38358e-07	1.94516e-05	0	0	2.45698	35.9707	YTHDC1;DDX1;DDX23;SRSF1;SART3;SNRPD2;SNRPD1;LUC7L;SNRPD3;SMN1;SF3B1;SRSF10;SRPK2;ZRSR2;NCBP1;SCAF11;CRNKL1;SRPK1;SETX;PRPF6;SNRPG;LUC7L3;SNRPE;SRSF5;SNRNP200;LUC7L2
proteasomal protein catabolic process (GO:0010498)	96/237	4.77014e-07	2.09845e-05	0	0	1.5694	22.8438	GSK3B;UBXN1;UBXN2A;FAF1;UBE2D3;KIF14;LTN1;BUB1B;CDC20;PSMD9;RNF115;PSMD6;PSMD7;CDC23;PSMD5;PSMD2;CDC27;PSMD1;TRIM25;GTSE1;USP44;UBE2E1;AXIN1;UBE4B;PPP2R5C;SIRT1;TOPORS;RBX1;DDB1;PSMA5;PSMA6;PSMA3;PSMA4;PSMA1;PSMA2;TBL1XR1;DDIT3;PSME4;PSME1;PSME2;PLAA;ANAPC4;SPOPL;ANAPC1;PSMD10;VCP;PSMD12;PSMD11;PSMD14;CUL3;CUL1;KLHL11;FBXO45;RNF6;ANAPC10;PSMA7;PCNP;ATXN3;RNF139;BTBD3;PCBP2;PSMB1;TBL1X;RPS27A;SOCS…
double-strand break repair via homologous recombination (GO:0000724)	40/76	5.34856e-07	2.33279e-05	0	0	2.03919	29.4485	FEN1;BLM;PSMD14;NUCKS1;SMC5;BRCA1;BRCA2;RAD54B;RAD51AP1;RECQL4;NIPBL;WRN;CDC45;RNF138;RBBP8;POLK;GEN1;GINS2;HELQ;PARP1;KDM4D;XRCC2;NSMCE2;GINS4;RECQL;RPA1;HUS1;RPA2;LIG3;CDC7;PALB2;MORF4L1;MMS22L;RAD50;RAD51C;RAD51;ARTN;RPA3;RFWD3;UBE2N
RNA secondary structure unwinding (GO:0010501)	28/46	5.43208e-07	2.34915e-05	0	0	2.35837	34.0213	EIF4A2;DDX6;EIF4A1;DDX5;DDX27;DDX3X;DDX46;DDX24;DHX9;DDX47;DDX1;EIF4A3;DDX23;DDX20;DDX42;DDX21;DHX36;DDX18;DDX59;HELQ;DDX55;DDX56;DDX31;DDX10;DDX52;DDX50;DDX19A;DDX19B
strand displacement (GO:0000732)	19/26	6.04286e-07	2.59132e-05	0	0	2.83134	40.5426	BARD1;BLM;RTEL1;RMI1;XRCC2;BRCA1;BRCA2;PALB2;RAD51AP1;BRIP1;WRN;RAD50;RAD51C;RAD51;EXO1;ARTN;RBBP8;ATM;DNA2
maturation of LSU-rRNA (GO:0000470)	17/22	6.43782e-07	2.73768e-05	0	0	2.99391	42.6808	MAK16;NOP2;RPF2;WDR12;FTSJ3;RPF1;RPL7;RSL1D1;RPL7A;NSA2;MRPL1;LAS1L;RPL7L1;PES1;NHP2;RPL35;RRP15
ribosome assembly (GO:0042255)	32/56	6.46893e-07	2.72818e-05	0	0	2.21398	31.5516	RPL5;DDX3X;RPL3;RPL10;MRPS11;RPL12;RPL11;NOP2;RPS27L;PWP2;RPF2;RPL6;RPF1;MRPL11;RPS15;RPS14;RPS17;RPS19;RRS1;BRIX1;RPS10;MDN1;EIF2A;NPM1;RPL23A;MRPS7;RPS28;RPS27;MRTO4;SBDS;RPL24;RSL24D1
mitotic nuclear envelope disassembly (GO:0007077)	27/44	6.87995e-07	2.87774e-05	0	0	2.37751	33.7357	POM121;NUP205;NUP107;SEH1L;NUP160;CCNB2;CCNB1;NUP85;TPR;NUP43;BANF1;NUP88;RANBP2;NUP133;NUP155;PLK1;VRK1;NUP153;PRKCA;NUP93;NUP50;CDK1;NUP35;NUP54;NUP98;NUPL2;NUP37
peptidyl-lysine modification (GO:0018205)	54/115	7.90231e-07	3.2785e-05	0	0	1.81932	25.5631	TOP2A;TOP2B;NUP107;USPL1;LOXL4;PLOD2;PARK7;GCSH;SENP6;SENP5;SUMO1;SENP8;SUMO3;SUMO2;ESCO1;NUP133;SENP2;RANGAP1;SIRT1;SENP3;TOPORS;NUP93;INCENP;NUP50;BIRC5;NUP54;NUP98;TOP1;LIPT1;NUP205;POM121;SEH1L;PCNA;CDCA8;LIAS;NUP160;AURKB;NUP85;TPR;NUP88;NUP43;RANBP2;UBE2I;NUP155;EYA1;NUP153;CTH;SP3;MDM2;UBA2;NUP35;SAE1;NUPL2;NUP37
regulation of cellular response to stress (GO:0080135)	50/104	8.29001e-07	3.41161e-05	0	0	1.86272	26.0838	YWHAE;GSK3B;DYRK3;NUP107;HSP90AB1;ING2;CHORDC1;IER3;HSP90AA1;NUP133;SIRT1;NUP93;DNAJC2;DNAJC7;NUP50;NUP54;NUP98;FKBP4;NUP205;POM121;CAMK2D;SEH1L;NUP160;NUAK1;HSPH1;BAG5;BAG2;DNAJB6;NUP85;TPR;MAPK1;NUP88;NUP43;RANBP2;HSPA8;NPM1;PNPT1;NUP155;NEK4;PTGES3;RPA1;RPA2;NUP153;RSL1D1;RPA3;NUP35;ATM;NUPL2;ATR;NUP37
intracellular transport of virus (GO:0075733)	31/54	8.40863e-07	3.43274e-05	0	0	2.22423	31.1144	NUP205;POM121;NUP107;SEH1L;TSG101;NUP160;XPO1;NUP85;TPR;KPNA4;NUP43;NUP88;KPNA2;RPS27A;KPNA3;KPNA1;RANBP2;NUP133;NUP155;VPS37A;NUP153;NUP93;NUP50;NMT2;NUP35;NUP54;NUP98;NUPL2;KPNB1;RAN;NUP37
transport of virus (GO:0046794)	31/54	8.40863e-07	3.4055e-05	0	0	2.22423	31.1144	NUP205;POM121;NUP107;SEH1L;TSG101;NUP160;XPO1;NUP85;TPR;KPNA4;NUP43;NUP88;KPNA2;RPS27A;KPNA3;KPNA1;RANBP2;NUP133;NUP155;VPS37A;NUP153;NUP93;NUP50;NMT2;NUP35;NUP54;NUP98;NUPL2;KPNB1;RAN;NUP37
transcription from RNA polymerase I promoter (GO:0006360)	22/33	9.70325e-07	3.89887e-05	0	0	2.58298	35.763	RRN3;TBP;CCNH;CD3EAP;GTF2H1;GTF2H2;TTF1;GTF2H5;TAF1D;TAF1B;DMTF1;POLR1A;POLR1B;TWISTNB;TAF1A;POLR1C;UBTF;POLR2F;POLR1E;POLR2H;MNAT1;POLR2K
RNA transport (GO:0050658)	41/80	9.75565e-07	3.8893e-05	0	0	1.98566	27.4821	SLBP;POM121;NXT1;RBM8A;FMR1;EIF4A3;SRSF1;U2AF1;MAGOH;XPO5;TPR;DHX38;HNRNPA1;EIF4E;RANBP2;RANBP1;PNPT1;NCBP1;NUP133;NUP155;NCBP2;THOC1;UPF3B;THOC3;NUP153;THOC2;THOC5;MAGOHB;CKAP5;CDC40;THOC7;SRRM1;SARNP;ZC3H11A;HNRNPA2B1;SRSF3;RNPS1;NUP98;SRSF5;SLU7;SRSF7
postreplication repair (GO:0006301)	28/47	1.01278e-06	4.00638e-05	0	0	2.30819	31.8595	VCP;PCNA;USP10;BRCA1;POLD3;TRIM25;POLI;RPS27A;POLH;RFC5;RFC3;RFC4;RFC1;UBE2B;RFC2;USP43;RPA1;REV1;RPA2;ISG15;UBE2A;WDR33;MSH2;RPA3;UBE2V2;UBE2N;DTL;RAD18
regulation of gene silencing by miRNA (GO:0060964)	36/67	1.01773e-06	3.99498e-05	0	0	2.0818	28.7246	TRIM71;NUP205;POM121;NUP107;SEH1L;DHX9;FMR1;ELAVL1;NUP160;FXR1;IPO8;POLR2A;NUP85;POLR2B;TPR;POLR2F;NUP43;NUP88;POLR2G;POLR2H;POLR2J;POLR2K;RANBP2;NUP133;NUP155;H3F3A;NUP153;PUM2;NUP93;NUP50;NUP35;NUP54;NUP98;NUPL2;RAN;NUP37
DNA-templated transcription, initiation (GO:0006352)	78/186	1.11401e-06	4.33954e-05	0	0	1.62478	22.2717	CRCP;CCNH;GTF2B;CCNC;RSF1;RBPJ;CTGF;MED17;MED13;CCND1;MED10;UBTF;TEAD1;GTF2I;TEAD4;TBP;MED8;CD3EAP;TFB2M;MED4;GTF2F1;GTF2F2;MED6;MED7;DMTF1;THRAP3;POLR1A;POLR1B;POLR1C;TFAM;POLR1E;YAP1;GTF2A2;RRN3;GTF3C4;CBFB;TAF9;GTF2E1;NR2C1;GTF2E2;CCNB1;TAF1D;TAF1B;POLR2A;POLR2B;MED31;TWISTNB;TAF1A;POLR2F;E2F3;POLR2G;NRBF2;POLR2H;POLR2J;POLR2K;NR2C2AP;MBD4;TAF15;TAF12;TAF13;TAF11;SMARCA5;NR1D2;GTF2H1;GTF2H2;ES…
termination of RNA polymerase I transcription (GO:0006363)	21/31	1.15205e-06	4.45371e-05	0	0	2.62464	35.8892	TBP;CCNH;CD3EAP;GTF2H1;GTF2H2;TTF1;GTF2H5;TAF1D;TAF1B;DMTF1;POLR1A;POLR1B;TWISTNB;TAF1A;POLR1C;UBTF;POLR2F;POLR1E;POLR2H;MNAT1;POLR2K
regulation of mRNA splicing, via spliceosome (GO:0048024)	33/60	1.42036e-06	5.44968e-05	0	0	2.13096	28.6925	RBM25;DDX5;RBM8A;YTHDC1;FMR1;CELF4;HNRNPU;PTBP1;TRA2B;MAGOH;CWC22;RBM7;MBNL3;HNRNPA1;SRSF10;SRSF12;SRPK2;TIA1;SF3A1;MBNL2;NCBP1;WTAP;PRDX6;JMJD6;SRPK1;HNRNPL;SMU1;SNW1;THRAP3;SRSF3;RNPS1;NUP98;SRSF7
regulation of ubiquitin protein ligase activity (GO:1904666)	23/36	1.68765e-06	6.42691e-05	0	0	2.47535	32.9028	RPL5;RPS7;UBE2C;USP44;RPL23;RPL11;PLK1;PTEN;UBE2E1;ANAPC10;CDC14B;CDC20;CCNB1;CDC23;UBE2S;CDC27;CDC16;CDK2;CDK1;ANAPC4;FBXO5;ANAPC1;MAD2L1
maturation of 5.8S rRNA from tricistronic rRNA transcript (SSU-rRNA, 5.8S rRNA, LSU-rRNA) (GO:0000466)	15/19	1.90357e-06	7.19548e-05	0	0	3.05879	40.2897	NOP14;KRI1;WDR12;FTSJ3;EXOSC7;PDCD11;ERI1;ERI2;EXOSC9;PES1;EXOSC8;RRS1;UTP20;EXOSC3;EXOSC2
positive regulation of telomere maintenance via telomere lengthening (GO:1904358)	22/34	2.07757e-06	7.79548e-05	0	0	2.50701	32.8025	CCT3;CCT2;RTEL1;TNKS;XRCC5;NEK7;PARN;AURKB;CCT6A;TNKS2;TCP1;HNRNPA2B1;MAPK1;NEK2;NAF1;ATM;CCT8;CCT7;HNRNPA1;CCT5;CCT4;ATR
regulation of DNA metabolic process (GO:0051052)	27/46	2.36793e-06	8.82012e-05	0	0	2.27414	29.4581	PIF1;USP37;PARG;UHRF2;UHRF1;DSCC1;NUCKS1;SMC3;MYC;USP1;SMARCAD1;RBBP6;KPNA2;POLH;KPNA1;ESCO1;XRCC5;ZBTB38;THOC1;ESCO2;TERF2;GRHL2;CCDC88A;HNRNPD;UBE2V2;UBE2N;MPHOSPH8
nuclear envelope disassembly (GO:0051081)	27/46	2.36793e-06	8.75621e-05	0	0	2.27414	29.4581	POM121;NUP205;NUP107;SEH1L;NUP160;CCNB2;CCNB1;NUP85;TPR;NUP43;BANF1;NUP88;RANBP2;NUP133;NUP155;PLK1;VRK1;NUP153;PRKCA;NUP93;NUP50;CDK1;NUP35;NUP54;NUP98;NUPL2;NUP37
global genome nucleotide-excision repair (GO:0070911)	21/32	2.53412e-06	9.3033e-05	0	0	2.54262	32.7633	UBE2I;PARP1;CETN2;USP45;XPC;GTF2H1;CHD1L;GTF2H2;RAD23B;GTF2H5;RBX1;CUL4A;DDB1;SUMO1;SUMO3;ERCC1;SUMO2;UBE2V2;UBE2N;RPS27A;CUL4B
chromatin remodeling at centromere (GO:0031055)	21/32	2.53412e-06	9.23685e-05	0	0	2.54262	32.7633	CENPT;HELLS;NPM1;CENPW;HJURP;SMARCA5;RSF1;CENPA;RBBP4;NASP;CENPH;CENPI;RUVBL1;CENPK;CENPL;OIP5;CENPN;RBBP7;CENPP;CENPQ;ITGB3BP
regulation of G0 to G1 transition (GO:0070316)	24/39	2.67067e-06	9.66554e-05	0	0	2.38429	30.598	SUZ12;PCGF6;RRM2;CBX5;APAF1;MAX;EED;CBX3;MGA;CDC7;BRCA1;BMI1;RNF2;RAD51;RYBP;TFDP1;RBBP4;TFDP2;SOX15;CHEK1;E2F1;RBBP8;RBBP7;EZH2
CENP-A containing nucleosome assembly (GO:0034080)	20/30	3.05657e-06	0.000109843	0	0	2.58298	32.7992	CENPT;NPM1;CENPW;HJURP;SMARCA5;RSF1;CENPA;RBBP4;NASP;CENPH;CENPI;RUVBL1;CENPK;CENPL;OIP5;CENPN;RBBP7;CENPP;CENPQ;ITGB3BP
CENP-A containing chromatin organization (GO:0061641)	20/30	3.05657e-06	0.000109075	0	0	2.58298	32.7992	CENPT;NPM1;CENPW;HJURP;SMARCA5;RSF1;CENPA;RBBP4;NASP;CENPH;CENPI;RUVBL1;CENPK;CENPL;OIP5;CENPN;RBBP7;CENPP;CENPQ;ITGB3BP
kinetochore organization (GO:0051383)	11/12	3.07857e-06	0.000109097	0	0	3.55159	45.0735	CENPT;CDT1;CENPE;CENPF;CENPW;CENPH;MIS12;POGZ;NUF2;CENPA;NDC80
negative regulation of G0 to G1 transition (GO:0070317)	23/37	3.36946e-06	0.000118582	0	0	2.40845	30.3483	SUZ12;PCGF6;RRM2;CBX5;APAF1;MAX;EED;CBX3;MGA;CDC7;BRCA1;BMI1;RNF2;RAD51;RYBP;TFDP1;RBBP4;TFDP2;CHEK1;E2F1;RBBP8;RBBP7;EZH2
regulation of mRNA processing (GO:0050684)	19/28	3.63628e-06	0.000127095	0	0	2.6291	32.9283	RBM27;SRPK2;TIA1;RBM26;PTCD2;DHX9;YTHDC1;SAFB;SUPT6H;CDK11B;IWS1;JMJD6;SRPK1;SLTM;CWC22;SAFB2;PAPOLA;SRSF3;SRSF10
transcription elongation from RNA polymerase I promoter (GO:0006362)	19/28	3.63628e-06	0.000126231	0	0	2.6291	32.9283	TBP;CCNH;CD3EAP;GTF2H1;GTF2H2;GTF2H5;TAF1D;TAF1B;POLR1A;POLR1B;TWISTNB;TAF1A;POLR1C;UBTF;POLR2F;POLR1E;POLR2H;MNAT1;POLR2K
snRNA transcription (GO:0009301)	36/70	3.96537e-06	0.000136725	0	0	1.99258	24.7836	INTS12;CCNK;GTF2A2;GTF2B;INTS10;SRRT;TAF9;ZC3H8;PHAX;RPAP2;GTF2E1;GTF2E2;SNAPC5;SNAPC1;POLR2A;POLR2B;POLR2F;POLR2G;RPRD1A;POLR2H;POLR2J;POLR2K;TBP;NCBP1;NCBP2;TAF13;INTS3;INTS2;TAF11;RPRD2;GTF2F1;GTF2F2;ELL2;INTS6;TAF5;INTS8
snRNA transcription from RNA polymerase II promoter (GO:0042795)	36/70	3.96537e-06	0.000135807	0	0	1.99258	24.7836	INTS12;CCNK;GTF2A2;GTF2B;INTS10;SRRT;TAF9;ZC3H8;PHAX;RPAP2;GTF2E1;GTF2E2;SNAPC5;SNAPC1;POLR2A;POLR2B;POLR2F;POLR2G;RPRD1A;POLR2H;POLR2J;POLR2K;TBP;NCBP1;NCBP2;TAF13;INTS3;INTS2;TAF11;RPRD2;GTF2F1;GTF2F2;ELL2;INTS6;TAF5;INTS8
histone mRNA metabolic process (GO:0008334)	17/24	4.86413e-06	0.000165478	0	0	2.74441	33.5741	SLBP;SSB;NCBP1;NCBP2;CPSF3;CPSF2;LSM1;EXOSC10;XRN1;PAPD5;SNRPG;ATM;SNRPE;SNRPF;SNRPD3;MTPAP;DCP2
intraciliary transport involved in cilium assembly (GO:0035735)	24/40	5.04235e-06	0.000170405	0	0	2.32468	28.3556	DYNC2H1;TTC26;TRAF3IP1;WDR19;IFT80;DYNLL1;WDR35;HSPB11;DYNC2LI1;IFT74;IFT88;KIF3B;KIF3A;IFT81;WDR60;TTC21B;TRIP11;KIF3C;TNPO1;KIFAP3;IFT57;IFT46;SSX2IP;CLUAP1
transcription initiation from RNA polymerase I promoter (GO:0006361)	21/33	5.27077e-06	0.000176952	0	0	2.46557	29.9649	RRN3;TBP;CCNH;CD3EAP;GTF2H1;GTF2H2;GTF2H5;TAF1D;TAF1B;DMTF1;POLR1A;POLR1B;TWISTNB;TAF1A;POLR1C;UBTF;POLR2F;POLR1E;POLR2H;MNAT1;POLR2K
negative regulation of mitotic cell cycle phase transition (GO:1901991)	39/79	5.8168e-06	0.000194008	0	0	1.91271	23.0573	PSMD10;PSMD12;PSMD11;PSMD14;PINX1;PTEN;CUL1;PKD2;CDC73;PSMA7;AURKA;PSMD9;PSMD6;PSMD7;GPNMB;PSMD5;PSMD2;PSMB1;PSMD1;RPS27A;BRD7;E2F7;USP47;RBX1;PSMA5;PSMA6;PSMA3;PSMC5;RBL1;PSMA4;PSMC6;PSMA1;PSMC3;PSMA2;PSMC1;PSME4;PSMC2;PSME1;PSME2
nuclear-transcribed mRNA catabolic process, deadenylation-dependent decay (GO:0000288)	33/63	5.93095e-06	0.00019653	0	0	2.02948	24.4255	EIF4A2;HBS1L;EIF4A1;DDX6;ZCCHC11;ZCCHC6;EIF4A3;PARN;WDR61;EXOSC7;EXOSC9;EXOSC8;EXOSC3;EIF4E;EXOSC2;DCPS;EIF4B;EXOSC1;PAIP1;TTC37;CNOT6L;DIS3;LSM1;RC3H1;LSM5;LSM3;CNOT6;CNOT7;LSM6;CNOT1;CNOT2;PABPC1;DCP2
nucleotide-excision repair, preincision complex assembly (GO:0006294)	19/29	7.98672e-06	0.000262943	0	0	2.53844	29.7956	PARP1;CCNH;CETN2;RPA1;RPA2;XPC;GTF2H1;CHD1L;GTF2H2;RAD23B;GTF2H5;RBX1;CUL4A;DDB1;RPA3;ERCC5;RPS27A;MNAT1;CUL4B
regulation of cellular amine metabolic process (GO:0033238)	28/51	9.24052e-06	0.000302272	0	0	2.12716	24.6578	PSMD10;PSMD12;PSMD11;PSMD14;ODC1;PSMA7;PSMD9;PSMD6;PSMD7;PSMD5;PSMD2;PSMB1;PSMD1;AZIN1;PSMA5;PSMA6;PSMA3;PSMC5;PSMA4;PSMC6;PSMA1;PSMC3;PSMA2;PSMC1;PSME4;PSMC2;PSME1;PSME2
regulation of cellular amino acid metabolic process (GO:0006521)	28/51	9.24052e-06	0.000300346	0	0	2.12716	24.6578	PSMD10;PSMD12;PSMD11;PSMD14;ODC1;PSMA7;PSMD9;PSMD6;PSMD7;PSMD5;PSMD2;PSMB1;PSMD1;AZIN1;PSMA5;PSMA6;PSMA3;PSMC5;PSMA4;PSMC6;PSMA1;PSMC3;PSMA2;PSMC1;PSME4;PSMC2;PSME1;PSME2
mitotic cytokinesis (GO:0000281)	31/59	1.03954e-05	0.000335746	0	0	2.03574	23.3583	ARL3;RTKN2;BRCA2;CENPA;SEPT8;SEPT7;SPAST;RACGAP1;STMN1;NUSAP1;SNX9;ECT2;MYH10;CEP55;BBS4;USP8;SEPT10;SEPT11;PLK1;CKAP2;KIF23;RHOC;SEPT2;CIT;ANLN;ESPL1;APC;INCENP;RASA1;MITD1;KIF20A
positive regulation of protein localization to chromosome, telomeric region (GO:1904816)	10/11	1.09772e-05	0.000352307	0	0	3.52224	40.2229	CCT6A;CCT2;GNL3L;DKC1;TCP1;CCT8;CCT7;CCT5;CCT4;GNL3
cytoskeleton-dependent cytokinesis (GO:0061640)	35/70	1.2084e-05	0.000385404	0	0	1.93723	21.9365	ARL3;RTKN2;BRCA2;CENPA;AURKB;SEPT8;SEPT7;SPAST;RACGAP1;STMN1;NUSAP1;SNX9;ECT2;MYH10;CEP55;BBS4;USP8;SEPT10;SEPT11;PLK1;CKAP2;KIF23;RHOC;RHOA;SEPT2;CIT;ANLN;ESPL1;APC;INCENP;RASA1;SPIRE2;SPIRE1;MITD1;KIF20A
positive regulation of telomere maintenance via telomerase (GO:0032212)	20/32	1.31615e-05	0.000417162	0	0	2.42154	27.2138	CCT3;CCT2;TNKS;XRCC5;NEK7;PARN;AURKB;CCT6A;TNKS2;TCP1;MAPK1;NEK2;NAF1;ATM;CCT8;CCT7;HNRNPA1;CCT5;CCT4;ATR
regulation of transcription elongation from RNA polymerase II promoter (GO:0034243)	16/23	1.34911e-05	0.00042497	0	0	2.69528	30.2235	SUPT16H;CTR9;SUPT4H1;AXIN1;RNF8;HNRNPU;WDR61;RTF1;SUPT6H;GTF2F2;CDC73;RNF168;LEO1;EAPP;ZMYND11;BRD4
positive regulation of cell cycle process (GO:0090068)	48/107	1.49167e-05	0.000466994	0	0	1.73808	19.3153	GPSM2;FEN1;UHRF2;CUL3;KIF14;TGFA;WIZ;BRCA1;PKD2;RRP8;AURKB;AURKA;CDC42;CCNB1;SPAST;RACGAP1;SOX15;CSPP1;RAD21;TPR;NUSAP1;ECT2;E2F7;E2F8;GEN1;EDN1;NPM2;SPAG5;RPL23;DDX11;RCC2;ATRX;HMGA2;CDC7;KIF23;CDC6;POU4F1;NDC80;RHOA;CIT;DYNC1LI1;IL1A;MYBBP1A;PHIP;PKN2;KIF20B;CRLF3;MAD2L1
regulation of hematopoietic stem cell differentiation (GO:1902036)	37/76	1.49781e-05	0.000466057	0	0	1.88625	20.9542	YAP1;PSMD10;PSMD12;FOXC1;PSMD11;PSMD14;CBFB;N4BP2L2;PSMA7;PSMD9;PSMD6;PSMD7;PSMD5;PSMD2;PSMB1;PSMD1;RPS27A;YTHDF2;TCF12;SETD1A;H3F3A;EIF2AK2;PSMA5;PSMA6;PSMA3;PSMC5;ITCH;PSMA4;PSMC6;PSMA1;PSMC3;PSMA2;PSMC1;PSME4;PSMC2;PSME1;PSME2
DNA-templated transcriptional preinitiation complex assembly (GO:0070897)	11/13	1.52941e-05	0.000473005	0	0	3.2784	36.351	TAF7L;GTF2A2;TBP;TAF12;TAF1B;GTF2B;TAF11;TAF7;BDP1;MED6;TAF1
nucleotide-excision repair, DNA incision, 5'-to lesion (GO:0006296)	22/37	1.5334e-05	0.000471381	0	0	2.30374	25.5379	RFC5;RFC3;PCNA;RFC4;PARP1;RFC1;RFC2;RPA1;RPA2;GTF2H1;CHD1L;GTF2H2;GTF2H5;RBX1;POLD3;CUL4A;DDB1;RPA3;ERCC1;ERCC5;RPS27A;CUL4B
chromatin remodeling (GO:0006338)	51/116	1.6294e-05	0.000497893	0	0	1.70343	18.7798	SUV39H2;HMGB2;HMGB3;CHD4;RSF1;HMGB1;NUDT5;MYSM1;RUVBL2;MYC;TOP1MT;RUVBL1;CHEK1;UBTF;SMARCAD1;SMARCC1;PBRM1;ACTL6A;ATRX;MSL3;CHD1L;BAZ1A;MORF4L1;MORF4L2;TFAM;PADI4;TOP1;HDAC2;ANP32A;HDAC1;SUPT4H1;SUPT6H;HMGXB4;RBBP4;MTA2;BPTF;SMARCE1;NPM1;NPM2;CBX3;MBD2;SMARCA5;HMGA2;DEK;SSRP1;NPM3;GATAD2B;TADA2A;ANP32E;HNRNPC;ANP32B
ATP-dependent chromatin remodeling (GO:0043044)	19/30	1.65025e-05	0.000501264	0	0	2.45383	27.0216	SMARCE1;HDAC2;SMARCC1;PBRM1;HDAC1;ACTL6A;MBD2;RNF8;SMARCA5;CHD4;SPTY2D1;GATAD2B;RBBP4;NASP;ANP32E;SMARCAD1;HNRNPC;ANP32B;MTA2
cellular protein metabolic process (GO:0044267)	166/484	1.6651e-05	0.000502781	0	0	1.32885	14.6213	RPL4;RPL5;RPL30;RPL3;RPL32;CSF1;RPL31;RPL34;UBE2D2;UBE2D3;DMP1;PLOD2;RPL8;TTF1;RPL9;FBXO22;ZDHHC2;RPL6;RPL7;RPS15;PCMT1;RPS14;RPS17;RPS16;LGALS1;PPP4R2;RPS19;RPS18;CHEK2;RPL35;RPL38;RPL37;SEPHS1;RPS11;RPL39;RPS10;RPS13;CSNK1G3;RPS9;RPL21;RPS7;RPS8;RPL23;FBXO2;RPL22;RPS6;SARS;MRPS18A;ADAM10;FBXO11;PDIA6;MRPS18C;EEF1A1;NHP2;RPL24;YME1L1;RPL27;RPL26;PADI4;RPL29;RPL28;LIPT1;PRKDC;MRPL18;SDC2;TARS;HTR…
regulation of mRNA metabolic process (GO:1903311)	12/15	1.74667e-05	0.000524309	0	0	3.09957	33.9565	RBM27;SRPK2;PTCD2;RBM26;SLTM;DHX9;SAFB2;SAFB;CDK11B;SUPT6H;IWS1;SRPK1
nuclear pore organization (GO:0006999)	12/15	1.74667e-05	0.000521243	0	0	3.09957	33.9565	NUP93;NUP205;AHCTF1;NUP107;SEH1L;NUP133;TPR;NUP35;NUP153;NUP54;NUP98;RTN4
regulation of RNA export from nucleus (GO:0046831)	12/15	1.74667e-05	0.000518212	0	0	3.09957	33.9565	RBM27;KHDRBS1;SETD2;CPSF6;RBM26;DHX9;NCBP2;TPR;NUP153;SUPT6H;IWS1;NUDT4
mRNA cis splicing, via spliceosome (GO:0045292)	13/17	1.78353e-05	0.00052609	0	0	2.96283	32.3965	NCBP2;WBP4;DDX23;SRSF1;PSIP1;CWC15;WBP11;SART1;PRPF39;SNRNP200;DCPS;RBM22;SRSF12
maturation of 5.8S rRNA (GO:0000460)	13/17	1.78353e-05	0.000523067	0	0	2.96283	32.3965	MAK16;WDR12;FTSJ3;RPF1;NSA2;EXOSC10;LAS1L;PDCD11;PES1;C1D;RRP15;SKIV2L2;MPHOSPH6
positive regulation of cell cycle G2/M phase transition (GO:1902751)	13/17	1.78353e-05	0.000520078	0	0	2.96283	32.3965	NPM1;VPS4B;RCC2;CDC7;RAB11A;MECP2;CCNB1;RAD51C;CCND1;CDK4;CDK1;DTL;BRD4
recombinational repair (GO:0000725)	35/71	1.79466e-05	0.00052035	0	0	1.90995	20.8721	FEN1;BLM;PSMD14;NUCKS1;SMC5;BRCA1;BRCA2;RAD54B;RAD51AP1;RECQL4;WRN;RNF138;RBBP8;POLK;GEN1;HELQ;PARP1;KDM4D;XRCC2;NSMCE2;RECQL;RPA1;HUS1;RPA2;LIG3;PALB2;MORF4L1;MMS22L;RAD50;RAD51C;RAD51;ARTN;RPA3;RFWD3;UBE2N
regulation of protein localization to Cajal body (GO:1904869)	8/8	1.96124e-05	0.000565436	0	0	3.87447	41.9967	CCT3;CCT6A;CCT2;TCP1;CCT8;CCT7;CCT5;CCT4
positive regulation of protein localization to Cajal body (GO:1904871)	8/8	1.96124e-05	0.000562259	0	0	3.87447	41.9967	CCT3;CCT6A;CCT2;TCP1;CCT8;CCT7;CCT5;CCT4
establishment of integrated proviral latency (GO:0075713)	8/8	1.96124e-05	0.000559118	0	0	3.87447	41.9967	XRCC6;XRCC4;XRCC5;HMGA1;PSIP1;LIG4;BANF1;PPIA
cellular protein complex assembly (GO:0043623)	60/144	2.31343e-05	0.000655857	0	0	1.61436	17.232	SRP19;AHCTF1;NUP107;HSP90AB1;ZFYVE9;CLTC;PIK3C2A;TOMM20;SEPT8;SEPT7;POGZ;LONP1;NCK1;CCDC39;CCT2;HSP90AA1;GPX4;VBP1;NRG1;SEPT2;RBX1;NUP93;IMMP1L;BBS12;TCP1;NUP98;VAMP4;NUP205;PSMD11;ARL6;POMP;MIS12;CUL1;CENPA;RTN4;HSPD1;CAND1;SAMM50;FCHO2;EPS15;EIF4B;SMAD2;CENPT;SEPT10;SEPT11;SMAD3;CENPW;HSPA4;PTGES3;NUP153;FKBP1A;ANLN;CENPE;CENPF;CHMP2A;SPAG1;PSMG1;NDUFAF1;PSMG2;PICALM
modification-dependent protein catabolic process (GO:0019941)	59/141	2.31734e-05	0.000653336	0	0	1.62123	17.3026	PPP1R11;UBE2D2;USP33;UBE2D3;FBXO22;PSMD9;NUB1;CDC23;LONP1;TRIM25;ARIH1;UBE2E1;UBE4A;UBE4B;FBXO11;TOPORS;RNF168;DDB1;RNF128;SQSTM1;DTL;PSMD11;PSMD14;UBA6;UHRF1;CUL3;RNF8;FBXO45;RNF6;ATXN3;ZNRF3;RNF217;UBR5;RBBP6;RPS27A;RANBP2;RNF20;RANBP1;UBE2I;HACE1;UBE2B;SMURF2;UBE2C;ISG15;UBE2G1;UBE2A;RNF146;COPS3;ITCH;PSMC6;UBE2S;NEDD4;PSMC2;TTC3;MDM2;RLIM;TRIP12;UBE2K;TAF1
RNA biosynthetic process (GO:0032774)	17/26	2.52811e-05	0.000708843	0	0	2.53331	26.8162	PRMT5;TAF12;TAF13;PRIM1;SMARCA5;RSF1;TTF2;TTF1;SETX;POLA1;HELB;POLR2A;TAF7;TCF4;SMN1;TAF5;TAF1
regulation of DNA recombination (GO:0000018)	20/33	2.53011e-05	0.000705529	0	0	2.34816	24.8545	ZRANB3;BLM;RTEL1;SETD2;KDM1A;THOC1;RPA2;SUPT6H;RAD51AP1;MSH6;RAD50;RAD51;PPP4R2;MSH2;MSH3;FIGNL1;CHEK1;SMARCAD1;KPNA2;KPNA1
telomere maintenance (GO:0000723)	27/51	3.202e-05	0.000888033	0	0	2.05119	21.2281	DCLRE1B;RTEL1;PCNA;PRKDC;SMC5;SMC6;RECQL4;POLD3;INSL6;WRN;XRCC6;PARP1;XRCC5;PTGES3;TINF2;NSMCE2;RPA1;RPA2;TERF1;TERF2;RAD50;SNRNP40;RAD51;ARTN;RPA3;APEX1;DNA2
viral life cycle (GO:0019058)	47/107	3.53732e-05	0.000975728	0	0	1.70187	17.4434	USP6NL;NUP205;POM121;VCP;NUP107;TSG101;SEH1L;HSP90AB1;VPS4B;HTATSF1;NUP160;XPO1;NUP85;TPR;KPNA4;NUP88;ITGAV;NUP43;KPNA2;RPS27A;KPNA3;EPS15;KPNA1;RANBP2;NUP155;NUP133;NUP153;VPS37A;DEK;NUP93;ITCH;AXL;NUP50;CHMP2B;CHMP4C;CHMP2A;NMT2;NUP35;NUP54;NUP98;NUPL2;PPIA;PPID;KPNB1;RAN;CHMP5;NUP37
nuclear transport (GO:0051169)	15/22	3.67845e-05	0.0010092	0	0	2.64168	26.9727	EIF5A;NUP205;NPM1;SET;NXT1;ANP32A;HMGA1;PSIP1;NXT2;XPO1;MYBBP1A;RSRC1;ANP32E;BANF1;NUP98
regulation of establishment of protein localization to telomere (GO:0070203)	9/10	3.88319e-05	0.00105967	0	0	3.48702	35.4151	CCT6A;CCT2;DKC1;TCP1;CCT8;TERF1;CCT7;CCT5;CCT4
regulation of chromosome segregation (GO:0051983)	18/29	4.10485e-05	0.00111421	0	0	2.40484	24.2907	CSNK2A1;SPAG5;CSNK2A2;SMC5;SMC6;CDC6;MKI67;AURKB;PUM2;CDC42;RACGAP1;APC;NEK2;KIF2C;ECT2;BUB1;RAD18;MAD1L1
error-prone translesion synthesis (GO:0042276)	14/20	4.30666e-05	0.0011628	0	0	2.71213	27.2644	RFC5;RFC3;PCNA;RFC4;RFC1;RFC2;RPA1;REV1;RPA2;RPA3;POLE2;REV3L;POLI;RPS27A
DNA damage response, signal transduction by p53 class mediator (GO:0030330)	38/82	4.67641e-05	0.00125598	0	0	1.79548	17.9017	CDKN1B;PCNA;USP10;RPS27L;BRCA1;TRIAP1;FOXM1;NDRG1;AURKA;RPS6KA6;CCNB1;CHEK2;MYO6;E2F1;RPS27A;GTSE1;E2F7;E2F8;NPM1;CNOT6L;PRMT1;GADD45A;PLK2;ATRX;CDC25C;CNOT6;TFDP1;CNOT7;TFDP2;ARTN;CNOT1;CNOT2;CENPJ;CDK2;CDK1;MDM2;ATM;RPL26
positive regulation of cell cycle arrest (GO:0071158)	38/82	4.67641e-05	0.00124941	0	0	1.79548	17.9017	CDKN1B;PCNA;UHRF2;BRCA1;TRIAP1;PKD2;RRP8;AURKA;CCNB1;CHEK2;E2F1;RPS27A;GTSE1;E2F7;E2F8;NPM1;CNOT6L;PRMT1;GADD45A;RPL23;PLK2;HMGA2;CDC25C;POU4F1;CNOT6;TFDP1;CNOT7;TFDP2;MYBBP1A;CNOT1;CNOT2;CENPJ;CDK2;CDK1;MDM2;ATM;RPL26;CRLF3
protein ubiquitination (GO:0016567)	170/506	4.77862e-05	0.00127007	0	0	1.3017	12.9503	UBE3C;UBE2D2;UBE2D3;CCNF;IPP;UBE2Z;FBXO22;PSMD9;NPEPPS;HERC4;RNF115;PSMD6;NUB1;PSMD7;PSMD5;PSMD2;RNF19A;PSMD1;TRIM25;SKP2;TRIM23;HERC6;USP7;WSB1;FBXW7;FBXO2;UBE2E1;UBE4A;UBE4B;LMO7;FBXO11;RC3H2;CCNB1IP1;RBX1;RRAGA;PSME4;PSME1;UBE2V2;PSME2;PSMD10;VCP;PSMD12;PSMD11;CBFB;CUL5;PSMD14;PRKDC;TNKS;UBA6;CUL3;CUL2;CTR9;CUL1;KLHL11;WDR61;UBR2;FBXO45;KLHL12;BCL10;UBR1;RTF1;HIF1A;VCPIP1;BTBD3;RNF217;UBR5;HLT…
positive regulation of G2/M transition of mitotic cell cycle (GO:0010971)	12/16	5.33444e-05	0.00141045	0	0	2.90585	28.5899	MECP2;CCNB1;RAD51C;CCND1;CDK4;VPS4B;RCC2;CDK1;CDC7;DTL;RAB11A;BRD4
regulation of gene expression, epigenetic (GO:0040029)	35/74	5.44084e-05	0.00143116	0	0	1.83252	17.9935	DNMT1;DDX21;CTCF;BMI1;TAF1D;ZFP57;RBBP4;TAF1B;TDG;TWISTNB;TAF1A;POLR2F;RBBP7;POLR2H;SF3B1;POLR2K;SUZ12;PRMT7;TBP;EED;H3F3A;GLMN;SMARCA5;CD3EAP;DEK;BAZ1B;MYBBP1A;POLR1A;POLR1B;MTF2;POLR1C;POLR1E;ERCC6;PHF19;EZH2
positive regulation of gene expression, epigenetic (GO:0045815)	25/47	5.62806e-05	0.00147282	0	0	2.06089	20.1661	DDX21;TAF1D;TAF1B;CHEK1;TWISTNB;TAF1A;POLR2F;POLR2H;SF3B1;POLR2K;TBP;ATAD2;H3F3A;HMGA1;SMARCA5;CD3EAP;DEK;BAZ1B;MYBBP1A;POLR1A;POLR1B;POLR1C;POLR1E;ERCC6;ASF1A
regulation of hematopoietic progenitor cell differentiation (GO:1901532)	36/77	5.81741e-05	0.00151461	0	0	1.81144	17.6653	YAP1;PSMD10;PSMD12;FOXC1;PSMD11;PSMD14;CBFB;PSMA7;PSMD9;PSMD6;PSMD7;PSMD5;PSMD2;PSMB1;PSMD1;RPS27A;YTHDF2;TCF12;SETD1A;H3F3A;EIF2AK2;PSMA5;PSMA6;PSMA3;PSMC5;ITCH;PSMA4;PSMC6;PSMA1;PSMC3;PSMA2;PSMC1;PSME4;PSMC2;PSME1;PSME2
7-methylguanosine RNA capping (GO:0009452)	19/32	6.02947e-05	0.00156185	0	0	2.30046	22.3519	RNGTT;NCBP1;RNMT;CCNH;NCBP2;FAM103A1;GTF2H1;GTF2H2;GTF2F1;GTF2F2;GTF2H5;POLR2A;POLR2B;POLR2F;POLR2G;POLR2H;MNAT1;POLR2J;POLR2K
7-methylguanosine mRNA capping (GO:0006370)	19/32	6.02947e-05	0.00155396	0	0	2.30046	22.3519	RNGTT;NCBP1;RNMT;CCNH;NCBP2;FAM103A1;GTF2H1;GTF2H2;GTF2F1;GTF2F2;GTF2H5;POLR2A;POLR2B;POLR2F;POLR2G;POLR2H;MNAT1;POLR2J;POLR2K
positive regulation of protein localization to nucleus (GO:1900182)	23/42	6.08783e-05	0.00156112	0	0	2.12173	20.5949	CCT3;CARD10;CCT2;PINX1;PLK1;LIF;NMD3;PARK7;EFCAB7;PARP9;IPO5;CCT6A;TPR;TCP1;CDK1;CCT8;ECT2;CCT7;GTSE1;CDK5RAP3;CCT5;CCT4;RBM22
regulation of spindle assembly (GO:0090169)	16/25	6.49037e-05	0.00165602	0	0	2.47966	23.9104	GPSM2;SPAG5;VPS4B;PLK1;HNRNPU;SMC3;SMC1A;SENP6;STAG2;CHMP1B;TPR;CHMP2B;CHMP4C;CHMP2A;CEP97;CHMP5
double-strand break repair via nonhomologous end joining (GO:0006303)	26/50	6.68047e-05	0.00169604	0	0	2.01472	19.369	DCLRE1B;DCLRE1A;MDC1;PSMD14;PRKDC;RNF8;BRCA1;BRCC3;INSL6;SUMO1;UIMC1;POLK;BARD1;XRCC6;XRCC4;XRCC5;LIG4;LIG3;RNF168;POLA1;RAD50;ARTN;ERCC1;UBE2V2;UBE2N;ATM
SCF-dependent proteasomal ubiquitin-dependent protein catabolic process (GO:0031146)	34/72	7.19987e-05	0.00181886	0	0	1.82961	17.4524	PSMD10;PSMD12;PSMD11;PSMD14;CCNF;KIF14;CUL1;RNF7;PSMA7;PSMD9;PSMD6;PSMD7;PSMD5;PSMD2;PSMB1;PSMD1;RPS27A;FBXW7;FBXO2;RBX1;PSMA5;PSMA6;PSMA3;PSMC5;PSMA4;PSMC6;PSMA1;PSMC3;PSMA2;PSMC1;PSME4;PSMC2;PSME1;PSME2
G-quadruplex DNA unwinding (GO:0044806)	7/7	7.60652e-05	0.00191212	0	0	3.87447	36.7451	PIF1;BLM;WRN;DHX9;DDX11;HNRNPA2B1;DNA2
exonucleolytic trimming to generate mature 3'-end of 5.8S rRNA from tricistronic rRNA transcript (SSU-rRNA, 5.8S rRNA, LSU-rRNA) (GO:0000467)	7/7	7.60652e-05	0.00190275	0	0	3.87447	36.7451	EXOSC7;ERI1;ERI2;EXOSC9;EXOSC8;EXOSC3;EXOSC2
exonucleolytic trimming involved in rRNA processing (GO:0000459)	7/7	7.60652e-05	0.00189347	0	0	3.87447	36.7451	EXOSC7;ERI1;ERI2;EXOSC9;EXOSC8;EXOSC3;EXOSC2
ribosomal large subunit assembly (GO:0000027)	18/30	7.78678e-05	0.00192893	0	0	2.32468	21.9926	RPL5;RPL3;RPL10;FASTKD2;RPL12;RPL11;NOP2;RPL23A;RPF2;RPL6;MRPL11;RPF1;MRTO4;RRS1;RPL24;BRIX1;RSL24D1;MDN1
nucleotide-excision repair, DNA incision (GO:0033683)	22/40	8.04409e-05	0.00198304	0	0	2.13096	20.0906	RFC5;RFC3;PCNA;RFC4;PARP1;RFC1;RFC2;RPA1;RPA2;GTF2H1;CHD1L;GTF2H2;GTF2H5;RBX1;POLD3;CUL4A;DDB1;RPA3;ERCC1;ERCC5;RPS27A;CUL4B
positive regulation of mitotic cell cycle phase transition (GO:1901992)	22/40	8.04409e-05	0.00197351	0	0	2.13096	20.0906	DDX3X;UBE2C;CDCA5;VPS4B;CUL3;RCC2;RDX;NSMCE2;CDC7;PHB2;RAB11A;MECP2;CCNB1;CDC45;RAD51C;CCND1;ESPL1;CDK4;CDK1;DTL;DLGAP5;BRD4
nucleotide-excision repair, DNA gap filling (GO:0006297)	15/23	8.04599e-05	0.00196453	0	0	2.52683	23.8223	RFC5;RFC3;PCNA;RFC4;LIG1;RFC1;RFC2;RPA1;RPA2;LIG4;LIG3;POLD3;RPA3;RPS27A;POLE
nuclear-transcribed mRNA catabolic process, exonucleolytic (GO:0000291)	20/35	8.23024e-05	0.00199995	0	0	2.21398	20.8227	DDX6;HBS1L;TTC37;DIS3;LSM1;WDR61;LSM5;LSM3;EXOSC7;CNOT6;LSM6;CNOT7;EXOSC9;EXOSC8;POLR2G;EXOSC3;DCPS;EXOSC2;EXOSC1;DCP2
anatomical structure homeostasis (GO:0060249)	20/35	8.23024e-05	0.00199047	0	0	2.21398	20.8227	DCLRE1B;RTEL1;XRCC6;PCNA;PARP1;XRCC5;PTGES3;RPA1;RPA2;TERF1;TERF2;RECQL4;POLD3;INSL6;WRN;RAD50;ARTN;RPA3;APEX1;DNA2
positive regulation of telomerase activity (GO:0051973)	20/35	8.23024e-05	0.00198108	0	0	2.21398	20.8227	CCT2;HSP90AA1;HSP90AB1;NVL;TNKS;XRCC5;PTGES3;NEK7;PARN;GRHL2;AURKB;DKC1;MYC;TCP1;HNRNPA2B1;HNRNPD;MAPK1;NEK2;NAF1;CCT4
regulation of mitotic cell cycle (GO:0007346)	65/165	8.57545e-05	0.00205448	0	0	1.52631	14.2924	BTG4;GPSM2;BTG3;BTG1;CDKN1B;CLTC;HNRNPU;MKI67;CKS1B;SLK;RCC1;NEK1;NEK2;FBXO5;CDK5RAP3;MAP2K4;PRMT5;SPHK1;DYNLT3;PRKCA;OXSR1;CDC25C;SIRT1;THAP1;DDB1;RBL1;CKS2;BIRC5;HECA;KIF20B;FOXC1;STK39;XPC;IQGAP1;STK3;SDCBP;CCNB1;PAK1;PAK3;MAP4K5;PAK2;EIF4E;MAP4K3;MAP4K4;MAP3K2;CDK19;SMAD3;NEK4;USP22;PLK1;NEK7;ASNS;CDK11B;TPX2;CYLD;DLG1;STK24;RPS6KB1;TAOK1;CDC16;MDM2;CDK1;TACC3;PKN2;MAD2L1
mitochondrial translational elongation (GO:0070125)	39/87	9.26952e-05	0.00221039	0	0	1.73683	16.1285	MRPS17;GFM1;MRPS14;MRPS11;MRPS33;MRPL18;MRPL19;MRPS31;MRPL16;MRPL39;MRPS10;MRPL15;MRPL13;MRPL32;MRPL33;MRPL11;MRPL3;MRPL40;MRPL1;MRPL9;CHCHD1;PTCD3;MRPS25;MRPS22;MRPL49;MRPS18A;MRPS21;MRPL28;MRPL47;MRPS7;MRPL45;MRPL24;MRPL21;MRPS18C;MRPL44;MRPL22;MRPL30;MRPS9;MRPL50
nucleotide-excision repair, preincision complex stabilization (GO:0006293)	14/21	9.84182e-05	0.00233594	0	0	2.58298	23.8313	PARP1;RPA1;RPA2;GTF2H1;CHD1L;GTF2H2;GTF2H5;RBX1;CUL4A;DDB1;RPA3;ERCC1;ERCC5;CUL4B
translational termination (GO:0006415)	42/96	0.000100535	0.00237515	0	0	1.69508	15.6032	MRPS17;MRPS14;MRPS11;MRPL18;MRPS33;MRPL19;MRPL16;MRPS31;MRPL39;MRPS10;MRPL15;MRPL13;MRPL32;GSPT1;MRPL33;MRPL11;MRPL3;MTRF1;MRPL1;MRPL40;MRPL9;CHCHD1;PTCD3;MRPS25;MRPS22;MRPL49;MRPS18A;MRPS21;MRPL28;MRPL47;MRPS7;MRPL45;MRPL24;MRPL21;MRPS18C;MRPL44;MRPL22;MRPL30;MRPS9;MRPL50;ETF1;ABCE1
translational elongation (GO:0006414)	45/105	0.000105121	0.00247204	0	0	1.66049	15.2107	MRPS17;GFM1;MRPS14;MRPL18;MRPS11;MRPS33;MRPL19;LTN1;MRPL16;MRPS31;MRPL39;MRPS10;MRPL15;MRPL13;MRPL32;MRPL11;MRPL33;EFTUD2;EEF1B2;MRPL3;MRPL1;MRPL40;MRPL9;CHCHD1;PTCD3;MRPS25;MRPS22;MRPL49;MRPS18A;MRPL28;MRPS21;MRPL47;MRPS7;MRPL45;MRPL24;MRPL21;MRPS18C;MRPL22;MRPL44;EEF1A1;MRPL30;EEF1G;MRPS9;MRPL50;EEF1D
exonucleolytic nuclear-transcribed mRNA catabolic process involved in deadenylation-dependent decay (GO:0043928)	19/33	0.000107786	0.00252309	0	0	2.23075	20.3787	DDX6;HBS1L;TTC37;DIS3;LSM1;WDR61;LSM5;LSM3;EXOSC7;CNOT6;LSM6;CNOT7;EXOSC9;EXOSC8;EXOSC3;EXOSC2;DCPS;EXOSC1;DCP2
intraciliary transport (GO:0042073)	24/46	0.000118048	0.00275069	0	0	2.02146	18.2829	DYNC2H1;TTC26;TRAF3IP1;WDR19;IFT80;DYNLL1;WDR35;HSPB11;DYNC2LI1;IFT74;IFT88;KIF3B;KIF3A;IFT81;WDR60;TTC21B;TRIP11;KIF3C;TNPO1;KIFAP3;IFT57;IFT46;SSX2IP;CLUAP1
mitotic spindle assembly (GO:0090307)	24/46	0.000118048	0.00273819	0	0	2.02146	18.2829	BCCIP;SPICE1;XIAP;KIF23;KIF11;AURKB;RHOA;RAB11A;MZT1;CDC14B;TPX2;KIF3B;RACGAP1;KIF2A;KIFC1;CHEK2;TUBGCP5;BIRC5;MYBL2;CEP192;TUBGCP3;PIBF1;CLASP1;KPNB1
regulation of mitotic spindle assembly (GO:1901673)	13/19	0.000118241	0.00273025	0	0	2.65095	23.972	VPS4B;PLK1;HNRNPU;SMC1A;SMC3;STAG2;CHMP1B;TPR;CHMP2B;CHMP4C;CHMP2A;CEP97;CHMP5
positive regulation of chromosome organization (GO:2001252)	13/19	0.000118241	0.00271795	0	0	2.65095	23.972	BECN1;FEN1;RTEL1;DDX11;ATRX;HNRNPU;LIG4;TERF1;GNL3;RAD50;ARTN;RAD21;DHX36
regulation of stem cell differentiation (GO:2000736)	39/88	0.000125363	0.00286874	0	0	1.71709	15.4269	YAP1;PSMD10;PSMD12;PSMD11;PSMD14;CBFB;HNRNPU;PSMA7;PSMD9;PSMD6;PSMD7;PSMD5;PSMD2;PSMB1;PSMD1;RPS27A;JAG1;YTHDF2;TCF12;SETD1A;H3F3A;EIF2AK2;PSMA5;PSMA6;PSMA3;PSMC5;ITCH;PSMA4;PSMC6;PSMA1;PSMC3;GDNF;PSMA2;PSMC1;PSME4;PSMC2;PSME1;OCIAD1;PSME2
regulation of transcription involved in G1/S transition of mitotic cell cycle (GO:0000083)	16/26	0.0001283	0.00292284	0	0	2.38429	21.3659	CDT1;PCNA;RRM2;CDC6;TYMS;DHFR;NPAT;POLA1;CDC45;TFDP1;ORC1;TFDP2;E2F1;FBXO5;E2F7;BRD4
negative regulation of telomere maintenance via telomere lengthening (GO:1904357)	16/26	0.0001283	0.00290985	0	0	2.38429	21.3659	PIF1;PARP1;TNKS;PINX1;TINF2;HNRNPU;TERF1;TERF2;EXOSC10;GNL3L;TNKS2;XRN1;PAPD5;HNRNPC;HNRNPA1;DCP2
protein-DNA complex assembly (GO:0065004)	40/91	0.000128554	0.00290269	0	0	1.70306	15.258	CCNH;CETN2;HMGB2;RSF1;XPC;SPTY2D1;CENPA;CHAF1B;CHAF1A;SART3;RPS27A;BRD2;NPM1;PARP1;XRCC2;ATRX;H3F3A;SMARCA5;RPA1;RPA2;GTF2H1;CHD1L;GTF2H2;RAD23B;GTF2H5;RBX1;DDB1;CUL4A;RAD51C;RAD51;GRWD1;RPA3;ANP32E;ERCC5;TCF4;PADI4;ANP32B;MNAT1;ASF1A;CUL4B
telomere organization (GO:0032200)	22/41	0.000131425	0.00295446	0	0	2.07898	18.58	DCLRE1B;RTEL1;XRCC6;PCNA;PARP1;XRCC5;PTGES3;H3F3A;TINF2;RPA1;RPA2;TERF1;TERF2;RECQL4;POLD3;INSL6;WRN;RAD50;ARTN;RPA3;APEX1;DNA2
mRNA metabolic process (GO:0016071)	42/97	0.000133455	0.00298693	0	0	1.6776	14.9672	SLBP;DDX5;SF3B2;SF3B3;CSTF3;SRSF1;SUPT4H1;HNRNPR;U2AF1;USP39;PRPF8;EFTUD2;PTBP1;PCF11;PCBP2;DHX15;SNRPD3;SF3A3;SRRM4;SF3A1;CPSF6;PNPT1;SSB;NCBP1;SCAF11;DIS3;NCBP2;CPSF3;NONO;LSM5;LSM3;WDR33;KIN;PRPF18;PRPF3;HNRNPA2B1;SNRPG;SNRPE;SNRPF;SRSF5;SRSF7;DCP2
small nucleolar ribonucleoprotein complex assembly (GO:0000491)	8/9	0.000136065	0.00303205	0	0	3.44397	30.6595	SHQ1;NUFIP1;ZNHIT6;RUVBL2;RUVBL1;TAF9;PIH1D2;NAF1
establishment of viral latency (GO:0019043)	8/9	0.000136065	0.00301886	0	0	3.44397	30.6595	XRCC6;XRCC4;XRCC5;HMGA1;PSIP1;LIG4;BANF1;PPIA
positive regulation of establishment of protein localization to telomere (GO:1904851)	8/9	0.000136065	0.0030058	0	0	3.44397	30.6595	CCT6A;CCT2;DKC1;TCP1;CCT8;CCT7;CCT5;CCT4
non-recombinational repair (GO:0000726)	25/49	0.000137052	0.00301455	0	0	1.97677	17.5837	DCLRE1B;DCLRE1A;MDC1;PSMD14;PRKDC;RNF8;BRCA1;BRCC3;INSL6;SUMO1;UIMC1;BARD1;XRCC6;XRCC4;XRCC5;LIG4;LIG3;RNF168;POLA1;RAD50;ARTN;ERCC1;UBE2V2;UBE2N;ATM
RNA stabilization (GO:0043489)	12/17	0.000138567	0.00303479	0	0	2.73492	24.2974	LARP1;GDNF;DKC1;THRAP3;DHX36;PARN;E2F1;HNRNPU;NAF1;PABPC1;ELAVL1;PAIP1
negative regulation of telomere maintenance (GO:0032205)	12/17	0.000138567	0.00302182	0	0	2.73492	24.2974	RTEL1;RAD50;PARP1;TNKS2;XRCC5;TNKS;ARTN;ERCC1;PINX1;ATM;TERF1;TERF2
spindle assembly checkpoint (GO:0071173)	12/17	0.000138567	0.00300896	0	0	2.73492	24.2974	IK;CENPF;APC;PLK1;TPR;KLHL22;BUB1B;TTK;ATM;TRIP13;BUB1;MAD1L1
mitotic spindle assembly checkpoint (GO:0007094)	12/17	0.000138567	0.00299621	0	0	2.73492	24.2974	IK;CENPF;APC;PLK1;TPR;KLHL22;BUB1B;TTK;ATM;TRIP13;BUB1;MAD1L1
mitotic spindle checkpoint (GO:0071174)	12/17	0.000138567	0.00298357	0	0	2.73492	24.2974	IK;CENPF;APC;PLK1;TPR;KLHL22;BUB1B;TTK;ATM;TRIP13;BUB1;MAD1L1
regulation of response to DNA damage stimulus (GO:2001020)	20/36	0.000140373	0.00300977	0	0	2.15248	19.0951	PARG;NEK4;FEM1B;FMR1;RPA2;HMGA2;WDR76;ETAA1;ING2;BCLAF1;NSMCE4A;EID3;MYC;RFWD3;SMYD2;USP1;UBE2V2;UBE2N;POLH;IER3
positive regulation of ubiquitin-protein transferase activity (GO:0051443)	18/31	0.000140949	0.00300947	0	0	2.24969	19.9483	DCUN1D5;FBXW7;UBE2C;DCUN1D4;PLK1;PTEN;DCUN1D1;AXIN1;BMI1;ANAPC10;TOPORS;CDC14B;CDC20;UBE2S;UBE2N;TRIB3;FBXO5;RPS2
NIK/NF-kappaB signaling (GO:0038061)	36/80	0.000154377	0.00328245	0	0	1.74351	15.3012	PSMD10;PSMD12;PSMD11;PSMD14;CUL1;TANK;PSMA7;PSMD9;PSMD6;PSMD7;PSMD5;PSMD2;PSMB1;PSMD1;RPS27A;CARD10;CHUK;ZFP91;TNFRSF10B;TIRAP;PSMA5;PSMA6;PSMA3;PSMC5;PSMA4;PSMC6;PSMA1;PSMC3;PSMA2;PSMC1;PSME4;PSMC2;PSME1;UBA3;PSME2;TLR3
signal transduction involved in mitotic G1 DNA damage checkpoint (GO:0072431)	30/63	0.000155694	0.0032967	0	0	1.84498	16.1761	CDKN1B;PCNA;PRKDC;TRIAP1;AURKA;CCNB1;CHEK2;E2F1;RPS27A;GTSE1;E2F7;E2F8;NPM1;CNOT6L;PRMT1;GADD45A;PLK2;CDC25C;CNOT6;TFDP1;CNOT7;TFDP2;CNOT1;CNOT2;CENPJ;CDK2;CDK1;MDM2;ATM;RPL26
regulation of centriole replication (GO:0046599)	11/15	0.000156667	0.0033036	0	0	2.84128	24.8935	PLK4;NPM1;STIL;PLK2;CENPJ;SPICE1;TRIM37;BRCA1;CEP76;CDK5RAP2;MDM1
regulation of mitotic sister chromatid separation (GO:0010965)	11/15	0.000156667	0.00329001	0	0	2.84128	24.8935	CENPE;CDC23;PTTG1;UBE2C;PLK1;TPR;CDC27;TACC3;RIOK2;CDC6;ANAPC1
response to X-ray (GO:0010165)	11/15	0.000156667	0.00327652	0	0	2.84128	24.8935	IKBIP;BLM;XRCC6;NIPBL;XRCC4;MSH2;XRCC5;LIG4;NUCKS1;ATM;BRCC3
positive regulation of DNA-templated transcription, elongation (GO:0032786)	15/24	0.000163318	0.00340168	0	0	2.42154	21.1154	SUPT16H;CTR9;THOC1;SUPT4H1;WDR61;RTF1;THOC5;GTF2F2;SUPT6H;CDC73;LEO1;ERCC6;EAPP;BRD4;HMGN1
mRNA splice site selection (GO:0006376)	15/24	0.000163318	0.00338785	0	0	2.42154	21.1154	SF3A3;ISY1;SF3A1;YTHDC1;SRSF1;PSIP1;SETX;PRPF39;LUC7L3;LUC7L;SRSF5;SLU7;SRSF10;LUC7L2;SRSF12
positive regulation of chromosome segregation (GO:0051984)	9/11	0.000164179	0.00339193	0	0	3.17002	27.6253	FEN1;CCNB1;RAD21;RCC2;DDX11;SMC5;SMC6;CDC6;RAD18
regulation of chromatin silencing (GO:0031935)	9/11	0.000164179	0.00337825	0	0	3.17002	27.6253	HIRA;CDC45;UHRF2;UHRF1;ATAD2;MIER1;HMGA1;SIRT1;ASF1A
RNA polymerase II transcriptional preinitiation complex assembly (GO:0051123)	9/11	0.000164179	0.00336468	0	0	3.17002	27.6253	TAF7L;GTF2A2;TBP;TAF12;GTF2B;TAF11;TAF7;MED6;TAF1
DNA strand elongation (GO:0022616)	10/13	0.000167729	0.00342368	0	0	2.98036	25.9087	DCLRE1B;GINS1;GINS2;POLA1;RFC3;RAD50;RFC4;ARTN;GINS3;GINS4
viral translation (GO:0019081)	10/13	0.000167729	0.00341004	0	0	2.98036	25.9087	MCTS1;PTBP1;SSB;EIF3L;PCBP2;EIF3G;DENR;EIF3D;EIF3A;EIF3B
mitochondrial translational termination (GO:0070126)	39/89	0.000168066	0.00340334	0	0	1.6978	14.7558	MRPS17;MRPS14;MRPS11;MRPS33;MRPL18;MRPL19;MRPS31;MRPL16;MRPL39;MRPS10;MRPL15;MRPL13;MRPL32;MRPL33;MRPL11;MRPL3;MTRF1;MRPL40;MRPL1;MRPL9;CHCHD1;PTCD3;MRPS25;MRPS22;MRPL49;MRPS18A;MRPS21;MRPL28;MRPL47;MRPS7;MRPL45;MRPL24;MRPL21;MRPS18C;MRPL44;MRPL22;MRPL30;MRPS9;MRPL50
nucleotide-excision repair, DNA incision, 3'-to lesion (GO:0006295)	14/22	0.000206278	0.00416062	0	0	2.46557	20.9235	PARP1;RPA1;RPA2;GTF2H1;CHD1L;GTF2H2;GTF2H5;RBX1;CUL4A;DDB1;RPA3;ERCC1;ERCC5;CUL4B
early endosome to late endosome transport (GO:0045022)	14/22	0.000206278	0.00414423	0	0	2.46557	20.9235	BECN1;ANKRD27;AKTIP;STX8;PTPN23;SNF8;HOOK3;EEA1;HOOK2;SNX16;KIF16B;HOOK1;PIK3C3;RAB5A
regulation of cellular ketone metabolic process (GO:0010565)	29/61	0.000206552	0.00413346	0	0	1.84196	15.629	PSMD10;PSMD12;PSMD11;PSMD14;ODC1;PSMA7;PSMD9;PSMD6;PSMD7;PSMD5;PSMD2;PSMB1;PSMD1;SIRT1;AZIN1;PSMA5;PSMA6;PSMA3;PSMC5;PSMA4;PSMC6;PSMA1;PSMC3;PSMA2;PSMC1;PSME4;PSMC2;PSME1;PSME2
regulation of telomerase activity (GO:0051972)	22/42	0.000209027	0.00416666	0	0	2.02948	17.1959	PIF1;CCT2;HSP90AA1;HSP90AB1;PARP4;NVL;TNKS;XRCC5;PTGES3;PINX1;NEK7;PARN;TERF1;GRHL2;AURKB;DKC1;MYC;TCP1;MAPK1;NEK2;NAF1;CCT4
translesion synthesis (GO:0019985)	22/42	0.000209027	0.00415045	0	0	2.02948	17.1959	RFC5;VCP;RFC3;PCNA;RFC4;RFC1;USP10;RFC2;USP43;RPA1;REV1;RPA2;ISG15;POLD3;RPA3;POLE2;REV3L;TRIM25;POLI;RPS27A;DTL;POLH
protein localization to nucleus (GO:0034504)	41/96	0.000228485	0.00451921	0	0	1.65472	13.8732	IPO11;POM121;NXT1;NUP107;CSE1L;PINX1;RPL11;HNRNPU;NOL8;TOR1AIP2;NXT2;RPF2;IPO7;TBRG1;IPO8;WRN;SIX4;NUP85;RRS1;HEATR3;NUP88;TNPO3;BBS4;PDIA3;RANBP2;RANBP1;MORC3;NUP133;NUP155;PLK1;NUP153;GPN1;TOPORS;NUP93;NUP50;MDM2;NUP98;CALR;TAF3;KPNB1;RAN
protein monoubiquitination (GO:0006513)	20/37	0.000231673	0.00456459	0	0	2.09431	17.5297	RNF20;UBE2B;UHRF1;FANCL;CUL3;UBE2D3;CTR9;UBE2E1;KLHL22;KLHL12;CDC73;TOPORS;RBX1;UBE2W;UBE2T;LEO1;TRIM25;DTL;KBTBD8;RAD18
regulation of carbohydrate catabolic process (GO:0043470)	20/37	0.000231673	0.00454704	0	0	2.09431	17.5297	RANBP2;POM121;NUP205;NUP107;SEH1L;NUP133;NUP155;NUP153;NUP160;NUP93;NUP85;NUP50;TPR;NUP35;NUP43;NUP88;NUP54;NUP98;NUPL2;NUP37
mismatch repair (GO:0006298)	18/32	0.000244648	0.00478329	0	0	2.17939	18.1231	SETD2;RNASEH2A;PCNA;LIG1;RPA1;RPA2;XPC;MLH1;MLH3;POLD3;MSH6;MSH2;EXO1;MSH3;TDG;RPA3;PMS2;PMS1
negative regulation of telomere maintenance via telomerase (GO:0032211)	13/20	0.000257852	0.00502221	0	0	2.5184	20.8099	PIF1;PINX1;TINF2;HNRNPU;TERF1;TERF2;GNL3L;EXOSC10;XRN1;PAPD5;HNRNPC;HNRNPA1;DCP2
interstrand cross-link repair (GO:0036297)	24/48	0.000276221	0.00535954	0	0	1.93723	15.8743	DCLRE1B;FANCI;DCLRE1A;WDR48;FANCM;FANCL;RNF8;FANCA;RPA1;RPA2;NUCKS1;FANCB;RAD51AP1;RNF168;RAD51;EME1;FANCD2;UBE2T;RPA3;ERCC1;RFWD3;USP1;RPS27A;ATR
positive regulation of DNA metabolic process (GO:0051054)	36/82	0.000281458	0.00544046	0	0	1.70099	13.9065	OTUD4;RTEL1;DNMT1;CSF2;PCNA;DHX9;CEBPG;RNF8;HMGB1;BRCA1;BRCC3;IGF1R;MECP2;MYC;UIMC1;DHX36;PDGFC;RPS3;USP7;NPM2;SETDB1;EYA1;USP9X;ATRX;SIRT1;GNL3;RNF168;KITLG;RAD50;DBF4;RAD51;ARTN;APLF;UBE2N;DNA2;CALR
Wnt signaling pathway, planar cell polarity pathway (GO:0060071)	38/88	0.000291309	0.00560962	0	0	1.67307	13.6206	PSMD10;PSMD12;PSMD11;PSMD14;CLTC;PSMA7;CDC42;PSMD9;PSMD6;PSMD7;PSMD5;PSMD2;PSMB1;DVL2;PSMD1;RPS27A;FZD3;SMURF2;RYK;FZD6;AP2B1;RHOA;PSMA5;TIAM1;PSMA6;PSMA3;PSMC5;PSMA4;PSMC6;PSMA1;DAAM1;PSMC3;PSMA2;PSMC1;PSME4;PSMC2;PSME1;PSME2
DNA damage response, signal transduction by p53 class mediator resulting in cell cycle arrest (GO:0006977)	29/62	0.000293114	0.00562317	0	0	1.81225	14.7426	CDKN1B;PCNA;TRIAP1;AURKA;CCNB1;CHEK2;E2F1;RPS27A;GTSE1;E2F7;E2F8;NPM1;CNOT6L;PRMT1;GADD45A;PLK2;CDC25C;CNOT6;TFDP1;CNOT7;TFDP2;CNOT1;CENPJ;CNOT2;CDK2;CDK1;MDM2;ATM;RPL26
positive regulation of cellular protein metabolic process (GO:0032270)	39/91	0.000294559	0.00562971	0	0	1.66049	13.4998	RPL5;HDAC2;DDX3X;CSF1;UHRF1;FMR1;EIF4A3;FAM129A;RPS27L;ELAVL1;THBS1;RPS4X;RBM3;FXR1;CASP8;PERP;VPS35;HSP90AA1;YTHDF1;NPM1;YTHDF3;RDX;PLK1;MSN;UPF3B;WNT7A;UPF3A;LARP4B;INHBA;PASK;LARP4;ASPH;RPS6KB1;HNRNPD;EIF3E;RPL26;EZR;EIF3C;EIF3D
nuclear polyadenylation-dependent ncRNA catabolic process (GO:0071046)	6/6	0.00029497	0.00561653	0	0	3.87447	31.4941	EXOSC7;EXOSC10;EXOSC9;EXOSC8;EXOSC3;EXOSC2
purine nucleobase biosynthetic process (GO:0009113)	6/6	0.00029497	0.00559566	0	0	3.87447	31.4941	PRPS1;MTHFD1;MTHFD1L;SHMT1;GMPS;PAICS
nuclear polyadenylation-dependent rRNA catabolic process (GO:0071035)	6/6	0.00029497	0.00557493	0	0	3.87447	31.4941	EXOSC7;EXOSC10;EXOSC9;EXOSC8;EXOSC3;EXOSC2
positive regulation of RNA export from nucleus (GO:0046833)	6/6	0.00029497	0.00555436	0	0	3.87447	31.4941	RBM27;KHDRBS1;CPSF6;RBM26;DHX9;NCBP2
ribosomal small subunit export from nucleus (GO:0000056)	6/6	0.00029497	0.00553394	0	0	3.87447	31.4941	LTV1;RPS15;NPM1;XPO1;NUP88;RAN
dosage compensation by inactivation of X chromosome (GO:0009048)	6/6	0.00029497	0.00551367	0	0	3.87447	31.4941	PCGF5;PCGF3;RLIM;HNRNPU;BRCA1;CDYL
protein localization to nucleolus (GO:1902570)	6/6	0.00029497	0.00549354	0	0	3.87447	31.4941	WRN;PINX1;RRS1;NOL8;RPF2;RAN
tRNA catabolic process (GO:0016078)	6/6	0.00029497	0.00547357	0	0	3.87447	31.4941	EXOSC7;POP1;EXOSC9;EXOSC8;EXOSC3;EXOSC2
regulation of DNA-directed DNA polymerase activity (GO:1900262)	6/6	0.00029497	0.00545374	0	0	3.87447	31.4941	RFC5;RFC3;RFC4;RFC2;DSCC1;CHTF18
positive regulation of nucleobase-containing compound transport (GO:0032241)	6/6	0.00029497	0.00543405	0	0	3.87447	31.4941	RBM27;KHDRBS1;CPSF6;RBM26;DHX9;NCBP2
positive regulation of DNA-directed DNA polymerase activity (GO:1900264)	6/6	0.00029497	0.0054145	0	0	3.87447	31.4941	RFC5;RFC3;RFC4;RFC2;DSCC1;CHTF18
protein import into nucleus (GO:0006606)	43/103	0.000298046	0.00545135	0	0	1.6175	13.1313	CEP57;IPO11;POM121;NUP107;NXT1;ZFYVE9;CSE1L;NXT2;PHB2;IPO7;IPO5;IPO8;NUP85;TRPS1;TGS1;TPR;HEATR3;KPNA4;NUP88;KPNA2;TNPO1;JAK2;KPNA3;TNPO3;KPNA1;PDIA3;RANBP2;RANBP1;NUP155;NUP133;RPL23;NUP153;RANBP6;GPN1;NUP93;NUP50;NUP35;CTNNB1;NUP54;NUP98;KPNB1;RAN;RBM22
apical junction assembly (GO:0043297)	19/35	0.000307733	0.00560843	0	0	2.10328	17.0077	PRKCI;FBF1;F11R;MPP5;RHOC;GRHL2;RHOA;PARD6B;OCLN;DLG1;MARVELD2;APC;PARD3;MARVELD3;MICALL2;CTNNA1;PKN2;STRN;ECT2
DNA ligation (GO:0006266)	12/18	0.000317802	0.00577133	0	0	2.58298	20.8035	TOP2A;POLD3;XRCC6;PCNA;LIG1;PARP1;XRCC4;PARP2;HMGB2;LIG4;LIG3;HMGB1
regulation of ATP metabolic process (GO:1903578)	22/43	0.00032426	0.00586773	0	0	1.98229	15.9256	RANBP2;POM121;NUP205;NUP107;SEH1L;NUP133;NUP155;ATPIF1;NUP153;NUP160;NUP93;NUP85;NUP50;TPR;BEND3;NUP35;NUP43;NUP88;NUP54;NUP98;NUPL2;NUP37
cellular response to ionizing radiation (GO:0071479)	23/46	0.000368314	0.00664136	0	0	1.93723	15.3169	YAP1;BLM;XRCC6;KDM1A;KDM4D;XRCC5;GADD45A;HUS1;NUCKS1;TANK;SIRT1;RAD51AP1;WRN;NIPBL;RAD51;EEF1D;FIGNL1;TLK2;MDM2;ATM;RPL26;ECT2;ATR
positive regulation of canonical Wnt signaling pathway (GO:0090263)	46/113	0.00037147	0.00667468	0	0	1.57722	12.4569	PSMD10;VCP;PSMD12;PSMD11;DDX3X;PSMD14;TNKS;LRRK1;USP34;XIAP;PSMA7;PSMD9;PSMD6;PSMD7;TNKS2;PSMD5;PSMD2;RUVBL1;UBR5;PSMB1;PSMD1;TBL1X;RPS27A;WLS;USP8;USP47;SMURF2;AXIN1;WNT7A;CSNK1D;PSMA5;RNF146;PSMA6;PSMA3;PSMC5;PSMA4;PSMC6;PSMA1;PSMC3;TBL1XR1;PSMA2;PSMC1;PSME4;PSMC2;PSME1;PSME2
mitochondrial translation (GO:0032543)	44/107	0.000379621	0.00679722	0	0	1.59324	12.5489	MRPS17;GFM1;MRPS14;MRPL18;MRPS11;MRPS33;MRPL19;MRPL16;MRPS31;MRPL39;MRPS10;MTIF2;MRPL15;MRPL13;MRPL32;MRPL11;MRPL33;MRPL3;MTRF1;MRPL1;MRPL40;MRPL9;HARS;CHCHD1;PTCD3;MRPS25;MRPS22;MRPL49;GATC;MRPS18A;MRPL28;MRPS21;MRPL47;MRPS7;MRPL45;MRPL24;MRPL21;MRPS18C;MRPL22;MRPL44;MRPL30;LARS2;MRPS9;MRPL50
transcription initiation from RNA polymerase II promoter (GO:0006367)	61/160	0.000394368	0.00703657	0	0	1.47714	11.5782	CCNH;GTF2B;CCNC;RBPJ;CTGF;MED17;TAF7L;MED13;CCND1;MED10;TEAD1;GTF2I;TEAD4;TBP;MED8;MED4;GTF2F1;GTF2F2;MED6;MED7;THRAP3;YAP1;GTF2A2;CBFB;TAF9;GTF2E1;NR2C1;GTF2E2;CCNB1;POLR2A;POLR2B;MED31;POLR2F;E2F3;POLR2G;NRBF2;POLR2H;POLR2J;POLR2K;NR2C2AP;MBD4;TAF15;TAF12;TAF13;TAF11;NR1D2;GTF2H1;GTF2H2;ESR2;GTF2H5;NR4A2;SNW1;CDK4;CDK1;TAF7;TCF4;TAF5;MNAT1;TAF3;TAF2;TAF1
vesicle-mediated transport between endosomal compartments (GO:0098927)	14/23	0.000401996	0.00714768	0	0	2.35837	18.4403	BECN1;ANKRD27;AKTIP;STX8;PTPN23;SNF8;HOOK3;EEA1;HOOK2;SNX16;KIF16B;HOOK1;PIK3C3;RAB5A
positive regulation of response to DNA damage stimulus (GO:2001022)	24/49	0.000409825	0.00726158	0	0	1.8977	14.8016	DDX5;PCNA;EYA1;DHX9;FMR1;CEBPG;RNF8;HMGA2;BRCA1;BRCC3;SIRT1;RNF168;SPRED1;BCLAF1;NSMCE4A;EID3;MYC;UIMC1;ANKRD1;RPS3;UBE2N;ATM;EEF1E1;ATR
lagging strand elongation (GO:0006273)	7/8	0.000471239	0.00832088	0	0	3.39016	25.9691	POLA1;LIG1;PARP1;PARP2;LIG4;LIG3;DNA2
kinetochore assembly (GO:0051382)	7/8	0.000471239	0.00829218	0	0	3.39016	25.9691	CENPT;CENPE;CENPF;CENPW;POGZ;MIS12;CENPA
fibroblast growth factor receptor signaling pathway (GO:0008543)	34/78	0.000481861	0.00844996	0	0	1.68887	12.8993	CEP57;TRIM71;PTBP1;SPRED1;POLR2A;FLRT3;POLR2B;FLRT1;POLR2F;MAPK1;SHOC2;POLR2G;POLR2H;RPS27A;HNRNPA1;POLR2J;POLR2K;FGFBP1;TIA1;NCBP1;GALNT3;NCBP2;FRS2;PTPN11;GTF2F1;GTF2F2;SHCBP1;FGF17;SETX;HNRNPM;KIF16B;HNRNPH1;ESRP1;HNRNPF
regulation of transcription from RNA polymerase II promoter in response to hypoxia (GO:0061418)	34/78	0.000481861	0.00842102	0	0	1.68887	12.8993	PSMD10;PSMD12;PSMD11;PSMD14;CITED2;UBE2D2;UBE2D3;CUL2;RBPJ;HIF1A;PSMA7;PSMD9;PSMD6;PSMD7;PSMD5;PSMD2;PSMB1;PSMD1;RPS27A;RBX1;PSMA5;PSMA6;PSMA3;PSMC5;PSMA4;PSMC6;PSMA1;PSMC3;PSMA2;PSMC1;PSME4;PSMC2;PSME1;PSME2
regulation of RNA splicing (GO:0043484)	26/55	0.00048336	0.00841838	0	0	1.83157	13.9836	AHNAK;YTHDC1;PTBP1;POLR2A;TRA2B;CWC22;ZNF326;MBNL3;SRSF10;RPS13;SRPK2;SRRM4;TIA1;MBNL2;RRP1B;CLK4;PTBP2;JMJD6;SRPK1;RPS26;SETX;HNRNPH1;ESRP1;HNRNPF;SRSF3;RBM22
regulation of mitotic nuclear division (GO:0007088)	36/84	0.000494583	0.00858455	0	0	1.66049	12.6393	VPS4B;HNRNPU;TGFA;KIF11;MKI67;SMC3;CDC14B;AURKA;CDC23;CHMP1B;CHEK1;TPR;NUSAP1;RCC1;KNTC1;NEK2;FBXO5;CEP97;PRMT5;EDN1;NPM2;PLK1;SMC1A;CDC25C;TOM1L1;IL1A;ANLN;STAG2;NME6;CDC16;CHMP2B;CHMP4C;CHMP2A;PHIP;KIF20B;CHMP5
positive regulation of establishment of protein localization (GO:1904951)	9/12	0.000505306	0.00874094	0	0	2.90585	22.0564	CCT6A;CCT2;DKC1;TCP1;CHORDC1;CCT8;CCT7;CCT5;CCT4
regulation of rRNA processing (GO:2000232)	9/12	0.000505306	0.00871141	0	0	2.90585	22.0564	UTP15;USP36;SHQ1;DIMT1;HEATR1;WDR75;RIOK2;RIOK1;WDR43
DNA ligation involved in DNA repair (GO:0051103)	9/12	0.000505306	0.00868208	0	0	2.90585	22.0564	POLB;LIG1;PARP1;XRCC4;PARP2;HMGB2;LIG4;LIG3;HMGB1
spliceosomal tri-snRNP complex assembly (GO:0000244)	9/12	0.000505306	0.00865294	0	0	2.90585	22.0564	PRPF6;SART3;PRPF3;DDX20;CD2BP2;PRPF31;PRPF8;SRSF10;SRSF12
ribosomal subunit export from nucleus (GO:0000054)	9/12	0.000505306	0.008624	0	0	2.90585	22.0564	LTV1;RPS15;NPM1;XPO1;RRS1;NMD3;NUP88;ABCE1;RAN
regulation of chromatin organization (GO:1902275)	8/10	0.000525	0.00893025	0	0	3.09957	23.4083	SETD5;HIRA;PARG;SETD1A;TLK2;HNRNPU;TLK1;MKI67
primary miRNA processing (GO:0031053)	8/10	0.000525	0.00890058	0	0	3.09957	23.4083	SMAD2;SMAD3;NCBP1;HNRNPA2B1;SRRT;DROSHA;DGCR8;MRPL44
IRES-dependent viral translational initiation (GO:0075522)	8/10	0.000525	0.00887111	0	0	3.09957	23.4083	MCTS1;PTBP1;SSB;PCBP2;DENR;EIF3D;EIF3A;EIF3B
regulation of attachment of spindle microtubules to kinetochore (GO:0051988)	8/10	0.000525	0.00884183	0	0	3.09957	23.4083	CDC42;CCNB1;APC;RACGAP1;SPAG5;RCC2;NEK2;ECT2
regulation of DNA replication (GO:0006275)	28/61	0.000542738	0.0091105	0	0	1.77844	13.3719	USP37;BLM;CSF2;PCNA;DHX9;DSCC1;GMNN;NUCKS1;SMC3;PDS5A;IGF1R;PDGFC;RBBP6;S100A11;NPM2;ESCO1;ZBTB38;ESCO2;CDC6;TERF1;GTPBP4;CCDC88A;KITLG;DBF4;RAD17;DNA2;CALR;ATR
positive regulation of cellular amide metabolic process (GO:0034250)	28/61	0.000542738	0.00908063	0	0	1.77844	13.3719	RPL5;DDX3X;ROCK2;FMR1;EIF4A3;FAM129A;RPS27L;ELAVL1;THBS1;RPS4X;RBM3;FXR1;YTHDF1;NPM1;YTHDF3;UPF3B;UPF3A;LARP4B;PASK;LARP4;EFNA1;RPS6KB1;HNRNPD;EIF3E;RPL26;EIF3C;EIF3D;PICALM
positive regulation of viral genome replication (GO:0045070)	17/31	0.000543432	0.00906253	0	0	2.12471	15.9727	TOP2A;SRPK2;DDX3X;STAU1;YTHDC2;NUCKS1;SRPK1;DDB1;LARP1;CNOT7;PPIE;PKN2;PPIH;PABPC1;PPIB;PPIA;PPID
regulation of alternative mRNA splicing, via spliceosome (GO:0000381)	20/39	0.000577892	0.00960581	0	0	1.98691	14.8146	RBM25;DDX5;SF3A1;MBNL2;RBM8A;WTAP;FMR1;CELF4;HNRNPU;HNRNPL;SMU1;PTBP1;THRAP3;TRA2B;MAGOH;RNPS1;MBNL3;HNRNPA1;RBM7;SRSF12
mitotic DNA damage checkpoint (GO:0044773)	20/39	0.000577892	0.00957462	0	0	1.98691	14.8146	FANCI;ATF2;MDC1;BLM;TIPIN;RPS27L;HUS1;RPA2;HMGA2;EME1;CCND1;MSH2;ARTN;CHEK2;RFWD3;TAOK1;CDK2;CLSPN;TOPBP1;CDK5RAP3
regulation of coenzyme metabolic process (GO:0051196)	20/39	0.000577892	0.00954363	0	0	1.98691	14.8146	RANBP2;POM121;NUP205;NUP107;SEH1L;NUP133;NUP155;NUP153;NUP160;NUP93;NUP85;NUP50;TPR;NUP35;NUP43;NUP88;NUP54;NUP98;NUPL2;NUP37
response to endoplasmic reticulum stress (GO:0034976)	43/106	0.000618388	0.0101795	0	0	1.57172	11.6125	PPP1R15A;GSK3B;VCP;UBA5;TMTC3;FAM129A;ATP2A2;TANK;THBS1;HSP90B1;BCL2L11;AIFM1;RNF139;TRIM25;DNAJB9;CHAC1;MAP3K5;NCK1;PDIA3;PDIA2;HSPA5;RHBDD1;TNFRSF10B;MARCH6;PDIA6;EIF2S1;PDIA5;PDIA4;ERP44;TMX4;UFM1;TMX3;TMX1;DDIT3;DNAJC10;BCL2;UFC1;TRIB3;HYOU1;ATF6;ATF3;MBTPS2;ATF4
nucleic acid phosphodiester bond hydrolysis (GO:0090305)	32/73	0.000619108	0.0101586	0	0	1.6984	12.5464	FEN1;PCNA;DDX1;POLD3;ERI1;ERI2;RPS27A;RFC5;RFC3;RFC4;RFC1;PARP1;RFC2;RPA1;RPA2;GTF2H1;DICER1;CHD1L;EXOG;GTF2H2;GTF2H5;RBX1;PNRC2;DDB1;CUL4A;RAD50;RPA3;ERCC1;XRN2;ERCC5;DNA2;CUL4B
error-free translesion synthesis (GO:0070987)	12/19	0.000659908	0.0107933	0	0	2.44703	17.9206	RFC5;VCP;RFC3;PCNA;RFC4;RFC1;RFC2;RPA3;RPA1;RPA2;RPS27A;POLH
DNA double-strand break processing (GO:0000729)	12/19	0.000659908	0.0107588	0	0	2.44703	17.9206	BARD1;BLM;RAD50;RNF138;ARTN;UBE2V2;RBBP8;UBE2N;SMARCAD1;ATM;BRCA1;DNA2
regulation of translational initiation (GO:0006446)	28/62	0.000748311	0.0121612	0	0	1.74976	12.5942	EIF4A2;KHDRBS1;CDC123;DDX3X;FMR1;DDX1;MTIF2;PAIP2B;ALKBH1;TPR;POLR2G;PAIP2;EIF4B;NCK1;PAIP1;EIF5B;YTHDF1;NPM1;NCBP1;YTHDF3;NCBP2;EIF1;DNAJC3;EIF5;RPS6KB1;EIF3E;EIF4G2;EIF3B
regulation of DNA repair (GO:0006282)	19/37	0.000772509	0.0125146	0	0	1.98959	14.2571	PCNA;PARG;EYA1;DHX9;CEBPG;RNF8;BRCC3;BRCA1;DEK;SIRT1;RNF168;UBR5;UIMC1;USP1;RPS3;UBE2V2;UBE2N;TRIP12;POLH
base-excision repair (GO:0006284)	19/37	0.000772509	0.012475	0	0	1.98959	14.2571	USP47;LIG1;RPA1;HMGA1;RPA2;HMGA2;LIG3;UNG;POLB;RECQL4;WRN;NEIL3;TDG;RPA3;APEX1;POLK;DNA2;ERCC6;POLE
cytoplasmic microtubule organization (GO:0031122)	23/48	0.000794934	0.0127967	0	0	1.85652	13.2504	ATAD1;VPS4B;AXIN1;CRIPT;SLAIN2;HOOK3;CAMSAP1;RAB11A;CCDC88A;DLG1;SLK;SPAST;HOOK2;HOOK1;KATNA1;FIGNL1;TRPV4;CHORDC1;TUBGCP5;TUBGCP3;EZR;CLASP1;KPNB1
response to UV (GO:0009411)	40/98	0.000814775	0.0130748	0	0	1.58142	11.248	FEN1;PCNA;KDM1A;FMR1;TRIAP1;PTPRK;AURKB;WRN;CCND1;RUVBL2;MYC;USP1;N4BP1;POLH;MAP4K3;ZRANB3;USP47;NPM1;UBE2B;PARP1;RHBDD1;REV1;UBE4B;UBE2A;GTF2H2;EIF2S1;CDC25A;MAPK13;MSH6;MSH2;NEDD4;ERCC8;ERCC5;RPL26;ERCC6;DTL;RAD18;ATF4;ATR;TAF1
histone H2A ubiquitination (GO:0033522)	11/17	0.000833902	0.0133398	0	0	2.50701	17.7732	RNF168;DDB1;RYBP;UBE2B;RNF8;UBR2;TRIM37;UBE2A;BCOR;RNF2;CUL4B
histone H2A monoubiquitination (GO:0035518)	11/17	0.000833902	0.0132981	0	0	2.50701	17.7732	RNF168;DDB1;PCGF6;RYBP;PCGF5;PCGF3;TRIM37;BCOR;BMI1;RNF2;CUL4B
DNA replication checkpoint (GO:0000076)	11/17	0.000833902	0.0132567	0	0	2.50701	17.7732	CDT1;TIPIN;CDC45;TIMELESS;HUS1;RAD17;CDC6;CLSPN;TOPBP1;NAE1;DNA2
regulation of telomere maintenance via telomere lengthening (GO:1904356)	11/17	0.000833902	0.0132155	0	0	2.50701	17.7732	RTEL1;PARP1;TNKS2;TNKS;PINX1;TINF2;HNRNPA2B1;NAF1;ATM;TERF1;TERF2
regulation of establishment of planar polarity (GO:0090175)	37/89	0.00083661	0.0132174	0	0	1.61073	11.4139	PSMD10;PSMD12;PSMD11;PSMD14;CLTC;PSMA7;CDC42;PSMD9;PSMD6;PSMD7;PSMD5;PSMD2;PSMB1;DVL2;PSMD1;RPS27A;FZD3;SMURF2;FZD6;AP2B1;RHOA;PSMA5;TIAM1;PSMA6;PSMA3;PSMC5;PSMA4;PSMC6;PSMA1;DAAM1;PSMC3;PSMA2;PSMC1;PSME4;PSMC2;PSME1;PSME2
G2 DNA damage checkpoint (GO:0031572)	17/32	0.000882055	0.0138924	0	0	2.05831	14.4766	FANCI;BLM;PLK1;HMGA2;BRCC3;BRCA1;CDC14B;STK3;ARTN;TAOK1;CHEK1;UIMC1;RBBP8;CLSPN;TOPBP1;DTL;CDK5RAP3
positive regulation of telomere maintenance (GO:0032206)	17/32	0.000882055	0.0138496	0	0	2.05831	14.4766	RTEL1;TNKS;NEK7;ATRX;AURKB;GNL3;RAD50;TNKS2;ARTN;ERCC1;DHX36;HNRNPA2B1;HNRNPD;MAPK1;NEK2;NAF1;ATM
mRNA polyadenylation (GO:0006378)	15/27	0.000960567	0.0150361	0	0	2.15248	14.9554	CPSF6;PNPT1;CSTF3;CPSF3;CDC73;WDR33;FIP1L1;PCF11;PAPOLG;LEO1;PAPOLA;TUT1;PABPC1;MTPAP;GRSF1
nucleotide-excision repair, DNA duplex unwinding (GO:0000717)	13/22	0.000965662	0.0150696	0	0	2.28946	15.895	PARP1;CETN2;GTF2H1;XPC;CHD1L;GTF2H2;RAD23B;GTF2H5;RBX1;CUL4A;DDB1;RPS27A;CUL4B
DNA-dependent DNA replication maintenance of fidelity (GO:0045005)	18/35	0.00103372	0.0160825	0	0	1.99258	13.6982	ZRANB3;BLM;RTEL1;TIPIN;PCNA;FANCM;DDX11;ATRX;THOC1;NUCKS1;MMS22L;ETAA1;WRN;RAD51;EME1;RFWD3;TIMELESS;POLE
pseudouridine synthesis (GO:0001522)	10/15	0.00103843	0.0161067	0	0	2.58298	17.7452	PUS3;TRUB1;RPUSD4;PUS10;MRPL1;DKC1;PUS1;GAR1;NHP2;PUS7
mitotic sister chromatid cohesion (GO:0007064)	10/15	0.00103843	0.0160579	0	0	2.58298	17.7452	NAA50;SGO1;NIPBL;CHTF8;DSCC1;CDCA5;POGZ;PDS5B;PDS5A;SMC1A
regulation of mitotic metaphase/anaphase transition (GO:0030071)	10/15	0.00103843	0.0160094	0	0	2.58298	17.7452	CENPE;CDC23;ESPL1;UBE2C;CUL3;PLK1;NSMCE2;RIOK2;CDC6;DLGAP5
positive regulation of transcription elongation from RNA polymerase II promoter (GO:0032968)	10/15	0.00103843	0.0159612	0	0	2.58298	17.7452	SUPT16H;CTR9;LEO1;WDR61;RTF1;EAPP;SUPT6H;GTF2F2;CDC73;BRD4
mitotic chromosome condensation (GO:0007076)	10/15	0.00103843	0.0159132	0	0	2.58298	17.7452	NIPBL;CDCA5;PHF23;NUSAP1;NCAPG;NCAPD2;NCAPD3;SMC4;NCAPH;SMC2
negative regulation of DNA-dependent DNA replication (GO:2000104)	10/15	0.00103843	0.0158656	0	0	2.58298	17.7452	ZRANB3;BLM;TIPIN;STAG2;FBXW7;GMNN;TIMELESS;LIG3;SMC1A;SMC3
negative regulation of cellular amide metabolic process (GO:0034249)	32/75	0.00108528	0.0165318	0	0	1.65311	11.284	TRIM71;DDX3X;ROCK1;FMR1;SHMT1;EIF4A3;EPRS;TYMS;GIGYF2;FXR1;SYNCRIP;LARP1;RNF139;RPS3;IGF2BP1;IGF2BP2;PRNP;RPL13A;EIF2AK2;ORMDL1;MEX3C;DHFR;ILF3;MEX3A;CNOT7;CNOT1;NCL;CNOT2;CAPRIN1;HAP1;CALR;EIF4E2
antigen processing and presentation of exogenous peptide antigen via MHC class I, TAP-dependent (GO:0002479)	32/75	0.00108528	0.0164826	0	0	1.65311	11.284	PSMD10;PSMD12;PSMD11;PSMD14;PSMA7;PSMD9;PSMD6;PSMD7;PSMD5;PSMD2;PSMB1;PSMD1;ITGAV;IKBKG;PDIA3;CHUK;PSMA5;PSMA6;PSMA3;PSMC5;PSMA4;PSMC6;PSMA1;PSMC3;PSMA2;PSMC1;PSME4;PSMC2;PSME1;PSME2;CALR;SEC22B
antigen processing and presentation of exogenous peptide antigen via MHC class I (GO:0042590)	33/78	0.00108974	0.0165014	0	0	1.6392	11.1823	PSMD10;PSMD12;PSMD11;PSMD14;PSMA7;PSMD9;PSMD6;PSMD7;PSMD5;PSMD2;PSMB1;PSMD1;ITGAV;IKBKG;PDIA3;CHUK;LNPEP;PSMA5;PSMA6;PSMA3;PSMC5;PSMA4;PSMC6;PSMA1;PSMC3;PSMA2;PSMC1;PSME4;PSMC2;PSME1;PSME2;CALR;SEC22B
'de novo' posttranslational protein folding (GO:0051084)	16/30	0.00117925	0.0178039	0	0	2.06638	13.9334	HSPA9;CCT2;HSPA8;HSPA5;HSPA4;PTGES3;HSPA4L;DNAJB14;HSPA14;HSPE1;HSPA13;CHCHD4;HSPH1;DNAJC7;HYOU1;UGGT1
replication fork processing (GO:0031297)	16/30	0.00117925	0.0177514	0	0	2.06638	13.9334	ZRANB3;BLM;RTEL1;PCNA;FANCM;DDX11;ATRX;THOC1;NUCKS1;BRCA2;MMS22L;ETAA1;WRN;RAD51;EME1;RFWD3
establishment of chromosome localization (GO:0051303)	9/13	0.00126486	0.018984	0	0	2.68232	17.8986	CENPE;CENPF;NDE1;SPICE1;KIF2C;KIF22;FAM83D;CENPQ;NDC80
nucleotide-sugar metabolic process (GO:0009225)	9/13	0.00126486	0.0189284	0	0	2.68232	17.8986	CSGALNACT1;UGDH;EXTL2;FUT8;SLC35A3;PARG;UGP2;GMDS;GFPT1
DNA replication-independent nucleosome organization (GO:0034724)	9/13	0.00126486	0.018873	0	0	2.68232	17.8986	HIRA;SUPT16H;NASP;RBBP4;H3F3A;ATRX;HAT1;ASF1A;ASF1B
regulation of centrosome duplication (GO:0010824)	14/25	0.00127732	0.0190034	0	0	2.1697	14.4567	GEN1;NPM1;STIL;VPS4B;PLK2;CCNF;SPICE1;CHMP1B;CENPJ;CHMP2B;CHMP4C;CHMP2A;CEP76;CHMP5
regulation of telomere maintenance (GO:0032204)	14/25	0.00127732	0.0189481	0	0	2.1697	14.4567	PIF1;RTEL1;USP7;XRCC5;ATRX;TINF2;TERF2;GNL3;RAD50;ARTN;MYC;ERCC1;DHX36;HNRNPD
negative regulation of translation (GO:0017148)	36/88	0.00138041	0.020418	0	0	1.58501	10.4379	TRIM71;DDX3X;FMR1;SHMT1;EIF4A3;EPRS;TYMS;GIGYF2;FXR1;SYNCRIP;METTL14;PAIP2B;LARP1;RNF139;TPR;RPS3;IGF2BP1;IGF2BP2;PAIP2;YTHDF2;YTHDF3;RPL13A;EIF2AK2;MEX3C;DHFR;ILF3;CNOT6;MEX3A;CNOT7;CNOT1;NCL;CNOT2;CAPRIN1;EIF3E;CALR;EIF4E2
positive regulation of nucleocytoplasmic transport (GO:0046824)	17/33	0.0013848	0.0204238	0	0	1.99594	13.1377	YWHAE;RBM27;KHDRBS1;GSK3B;RBM26;CPSF6;DHX9;NCBP2;EFCAB7;IPO5;XPO4;NEDD4;TPR;ANP32B;ECT2;GTSE1;RBM22
positive regulation of viral life cycle (GO:1903902)	21/44	0.00141341	0.0207857	0	0	1.84918	12.1338	TOP2A;SRPK2;TSG101;DDX3X;STAU1;FMR1;VPS4B;SRPK1;DDB1;LARP1;LGALS1;CNOT7;CHMP2B;CHMP2A;CHMP4C;PPIE;PKN2;PPIH;PABPC1;PPIA;PPID
histone mRNA catabolic process (GO:0071044)	8/11	0.00148719	0.0218079	0	0	2.81779	18.3463	SSB;EXOSC10;XRN1;PAPD5;LSM1;ATM;MTPAP;DCP2
cell part morphogenesis (GO:0032990)	8/11	0.00148719	0.0217454	0	0	2.81779	18.3463	SUPV3L1;PNPT1;NUBPL;PACSIN2;MYH14;MFF;DNM1L;MTM1
attachment of mitotic spindle microtubules to kinetochore (GO:0051315)	8/11	0.00148719	0.0216833	0	0	2.81779	18.3463	CENPE;CDT1;SEH1L;NUF2;MIS12;KIF2C;MAD1L1;NDC80
protein K63-linked deubiquitination (GO:0070536)	15/28	0.00157813	0.0229436	0	0	2.07561	13.3908	OTUD4;USP25;USP8;USP16;USP27X;PSMD14;SHMT2;USP33;OTUD7B;TNFAIP3;BRCC3;ATXN3;CYLD;STAMBPL1;UIMC1
RNA polyadenylation (GO:0043631)	15/28	0.00157813	0.0228784	0	0	2.07561	13.3908	CPSF6;PNPT1;CSTF3;CPSF3;CDC73;WDR33;FIP1L1;PCF11;PAPOLG;LEO1;PAPOLA;TUT1;PABPC1;MTPAP;GRSF1
regulation of DNA endoreduplication (GO:0032875)	6/7	0.00160841	0.0232513	0	0	3.32097	21.3622	STAG2;FBXW7;SMC1A;SMC3;E2F7;E2F8
box C/D snoRNP assembly (GO:0000492)	6/7	0.00160841	0.0231856	0	0	3.32097	21.3622	NUFIP1;ZNHIT6;RUVBL2;RUVBL1;TAF9;PIH1D2
protein localization to cytoplasmic stress granule (GO:1903608)	6/7	0.00160841	0.0231203	0	0	3.32097	21.3622	TIA1;SSB;DDX3X;DHX9;DDX1;YBX1
outer mitochondrial membrane organization (GO:0007008)	6/7	0.00160841	0.0230554	0	0	3.32097	21.3622	HSP90AA1;SAMM50;HSPA4;TOMM7;TOMM20;TOMM22
maturation of LSU-rRNA from tricistronic rRNA transcript (SSU-rRNA, 5.8S rRNA, LSU-rRNA) (GO:0000463)	7/9	0.00164436	0.0235046	0	0	3.01347	19.3176	RPL7L1;PES1;RPL35;RPF2;WDR12;FTSJ3;RPL7
positive regulation of ribosome biogenesis (GO:0090070)	7/9	0.00164436	0.023439	0	0	3.01347	19.3176	UTP15;DIMT1;HEATR1;WDR75;RIOK2;RIOK1;WDR43
positive regulation of rRNA processing (GO:2000234)	7/9	0.00164436	0.0233737	0	0	3.01347	19.3176	UTP15;DIMT1;HEATR1;WDR75;RIOK2;RIOK1;WDR43
mitochondrion morphogenesis (GO:0070584)	7/9	0.00164436	0.0233088	0	0	3.01347	19.3176	SUPV3L1;PNPT1;NUBPL;MYH14;MFF;DNM1L;MTM1
mitotic recombination (GO:0006312)	11/18	0.00164492	0.0232521	0	0	2.36773	15.1773	GEN1;RAD50;SNRNP40;RAD51C;RAD51;XRCC2;ERCC1;NSMCE2;SMC5;SMC6;RAD54B
protein localization to centrosome (GO:0071539)	11/18	0.00164492	0.0231879	0	0	2.36773	15.1773	NEDD1;STIL;SPAG5;CCDC14;GOLGB1;SNX10;CSNK1D;CEP192;HOOK3;PIBF1;BBS4
negative regulation of protein dephosphorylation (GO:0035308)	11/18	0.00164492	0.023124	0	0	2.36773	15.1773	YWHAE;PPP1R15A;FKBP1A;GSK3B;PPP1R11;YWHAB;TIPRL;ENSA;PPP1R8;MASTL;ARPP19
interleukin-1-mediated signaling pathway (GO:0070498)	38/95	0.00168789	0.0236629	0	0	1.54979	9.89427	PSMD10;PSMD12;PSMD11;PSMD14;CUL1;IL1RAP;PSMA7;PSMD9;PSMD6;PSMD7;RPS6KA5;PSMD5;PSMD2;PSMB1;PSMD1;IKBKG;RPS27A;CHUK;RBX1;PSMA5;IL1A;PSMA6;PSMA3;PSMC5;PSMA4;PSMC6;PSMA1;PSMC3;PSMA2;PSMC1;PSME4;PSMC2;PSME1;UBE2N;PSME2;TAB3;TAB2;SQSTM1
regulation of telomere capping (GO:1904353)	13/23	0.00169843	0.0237454	0	0	2.18992	13.9674	USP7;RTEL1;TNKS;NEK7;TERF2;AURKB;RAD50;TNKS2;ARTN;HNRNPD;MAPK1;NEK2;ATM
nucleotide-excision repair, DNA damage recognition (GO:0000715)	13/23	0.00169843	0.0236806	0	0	2.18992	13.9674	PARP1;CETN2;XPC;RAD23B;RBX1;COPS4;CUL4A;DDB1;COPS3;COPS5;COPS2;RPS27A;CUL4B
tRNA processing (GO:0008033)	27/62	0.00179817	0.0250029	0	0	1.68727	10.6652	TRUB1;POP1;TSEN15;RPP30;DDX1;WDR4;CSTF2;ZBTB8OS;THUMPD1;TSEN2;THG1L;RPP14;RPP38;PUS3;SSB;NSUN2;RPP40;ADAT1;SARS;NSUN6;CDKAL1;TRNT1;ADAT2;KARS;TRMT6;FAM98B;AARS
spindle assembly (GO:0051225)	33/80	0.00181772	0.025206	0	0	1.59822	10.085	TNKS;BCCIP;XIAP;KIF11;KIF3B;HAUS8;CHEK2;RPS3;RCC1;NEK2;MYBL2;CEP192;PIBF1;CLASP1;NEK7;SPICE1;HAUS4;HAUS3;CSNK1D;HAUS6;TUBG1;RHOA;HAUS2;RAB11A;MZT1;HAUS1;TPX2;KIF2A;KIFC1;TUBGCP5;BIRC5;TUBGCP3;KPNB1
positive regulation of Wnt signaling pathway (GO:0030177)	52/140	0.00198379	0.0274344	0	0	1.43909	8.95508	DDX3X;LRRK1;USP34;CDC73;PSMD9;PSMD6;PSMD7;PSMD5;PSMD2;RUVBL1;SPIN1;PSMD1;WLS;USP8;USP47;CSNK2A1;ATP6AP2;AXIN1;CSNK1D;PSMA5;PPM1A;PSMA6;DEPDC1B;PSMA3;PSMA4;PSMA1;TBL1XR1;PSMA2;PSME4;PSME1;PSME2;PSMD10;VCP;PSMD12;PSMD11;PSMD14;TNKS;XIAP;PSMA7;TNKS2;UBR5;PSMB1;TBL1X;RPS27A;SMURF2;WNT7A;RNF146;PSMC5;PSMC6;PSMC3;PSMC1;PSMC2
regulation of double-strand break repair (GO:2000779)	17/34	0.00210925	0.0290906	0	0	1.93723	11.9361	RTEL1;SETD2;KDM1A;DDX11;RPA2;DEK;FOXM1;RAD51AP1;HELB;RAD51;PPP4R2;WDR70;FIGNL1;UBR5;CHEK1;TIMELESS;TRIP12
response to gamma radiation (GO:0010332)	14/26	0.0021142	0.0290802	0	0	2.08625	12.8494	YAP1;PRKAA1;XRCC6;KDM1A;XRCC5;LIG4;WRN;FANCD2;MYC;TLK2;MDM2;ATM;RPL26;ATR
regulation of centrosome cycle (GO:0046605)	14/26	0.0021142	0.029002	0	0	2.08625	12.8494	GEN1;NPM1;VPS4B;KIF11;AURKA;CHMP1B;CHEK1;CHMP2B;CHMP4C;CHMP2A;CEP250;CTNNB1;NEK2;CHMP5
protein localization to microtubule organizing center (GO:1905508)	10/16	0.00212919	0.0291293	0	0	2.42154	14.8974	NEDD1;STIL;SPAG5;CCDC14;SNX10;CSNK1D;CEP192;HOOK3;PIBF1;BBS4
positive regulation of mRNA processing (GO:0050685)	10/16	0.00212919	0.0290514	0	0	2.42154	14.8974	SNW1;NCBP1;NCBP2;THRAP3;TRA2B;CELF4;LEO1;NUP98;PRDX6;CDC73
regulation of cell cycle process (GO:0010564)	36/90	0.00220183	0.0299625	0	0	1.54979	9.48232	BECN1;AHCTF1;SETD2;CETN2;TXLNG;MKI67;FOXM1;AURKB;AURKA;CDC42;RACGAP1;RCC1;NEK2;FBXO5;ECT2;BBS4;SH3GLB1;PRMT5;TIPIN;YTHDF2;CSNK2A1;SPAG5;CSNK2A2;PLK1;HMGA2;PRPF40A;CDC25C;RAB11A;APC;PRC1;CDC16;PIK3C3;KIF20A;KIF20B;CALM2;MAD1L1
histone ubiquitination (GO:0016574)	12/21	0.00225774	0.0306416	0	0	2.21398	13.4907	RNF20;UBE2B;UHRF1;USP22;CTR9;UBE2E1;RNF8;LEO1;UBE2N;UBR2;UBE2A;CDC73
positive regulation of translation (GO:0045727)	32/78	0.00234727	0.0317722	0	0	1.58953	9.62378	RPL5;KHDRBS1;CDC123;DDX3X;USP16;DHX9;FMR1;EIF4A3;FAM129A;RPS27L;ELAVL1;THBS1;RPS4X;RBM3;FXR1;POLR2G;EIF5A;RPS9;YTHDF1;NPM1;YTHDF3;UPF3B;UPF3A;LARP4B;PASK;LARP4;RPS6KB1;HNRNPD;EIF3E;RPL26;EIF3C;EIF3D
nuclear-transcribed mRNA poly(A) tail shortening (GO:0000289)	15/29	0.00249495	0.0336819	0	0	2.00403	12.0112	EIF4A2;EIF4A1;ZCCHC11;ZCCHC6;CNOT6L;EIF4A3;PARN;CNOT6;CNOT7;CNOT1;CNOT2;PABPC1;EIF4E;EIF4B;PAIP1
response to unfolded protein (GO:0006986)	20/43	0.00268118	0.0361004	0	0	1.80208	10.671	HSPA9;HSPA8;HSP90AA1;HSP90AB1;HSPA5;HSPA4;RHBDD1;HSPA4L;HSPA14;TM7SF3;HSPE1;HSPA13;HSPD1;DNAJA1;ERP44;HSPH1;DNAJB4;DDIT3;HYOU1;OPTN
regulation of mitotic cell cycle spindle assembly checkpoint (GO:0090266)	9/14	0.00273055	0.0366685	0	0	2.49073	14.7034	GEN1;CDT1;DYNC1LI1;CCNB1;USP44;TPR;NDC80;CDK5RAP2;MAD2L1
ribonucleoside monophosphate biosynthetic process (GO:0009156)	9/14	0.00273055	0.0365722	0	0	2.49073	14.7034	ATIC;IMPDH2;PPAT;ADK;GMPS;PAICS;PFAS;GART;ADSS
positive regulation of macromolecule biosynthetic process (GO:0010557)	52/142	0.00281115	0.0375531	0	0	1.41882	8.33437	RPL5;CSF2;DDX3X;FMR1;EIF4A3;SCX;ELAVL1;IGF1R;RPS4X;RBM3;MYC;JAK2;HOXA5;EDN1;PRMT1;F2R;LARP4B;PASK;SIRT1;DBF4;RPL26;DNA2;TLR4;MTPN;HDAC2;PCNA;DHX9;HDAC1;FAM129A;RPS27L;NMD3;HIF1A;THBS1;FXR1;HSPH1;PDGFC;TGFB2;YTHDF1;NPM1;NPM2;YTHDF3;UPF3B;UPF3A;LARP4;KITLG;RPS6KB1;HNRNPD;EIF3E;CALR;EIF3C;EIF3D;RAB3GAP1
regulation of generation of precursor metabolites and energy (GO:0043467)	21/46	0.00281255	0.0374737	0	0	1.76878	10.3892	RANBP2;POM121;NUP205;NUP107;SEH1L;PNPT1;NUP133;NUP155;NUP153;NUP160;NUP93;NUP85;NUP50;TPR;NUP35;NUP43;NUP88;NUP54;NUP98;NUPL2;NUP37
positive regulation of protein complex assembly (GO:0031334)	35/88	0.00281496	0.0374082	0	0	1.54098	9.04989	GSK3B;VCP;CSF2;FAF1;ASAP1;IDE;BCLAF1;SUMO1;RPS3;SNX9;FNIP1;BID;FNIP2;SH3GLB1;UNC13B;CDT1;WARS;PARP1;RPA1;RPA2;GTF2H1;CHD1L;GTF2H2;GTF2H5;RBX1;DDB1;CUL4A;FOSL1;SETX;RPA3;ERCC1;CTNNB1;ERCC5;TLR4;CUL4B
regulation of proteasomal ubiquitin-dependent protein catabolic process (GO:0032434)	35/88	0.00281496	0.037311	0	0	1.54098	9.04989	PSMD10;GSK3B;VCP;UBXN1;HSP90AB1;RPL11;TAF9;PARK7;SDCBP;NUB1;BAG5;SUMO1;RNF138;RNF19A;SUMO2;RNF217;TLK2;BBS7;ARIH1;LONRF1;N4BP1;USP7;ANKIB1;CSNK1A1;GLMN;PLK1;CSNK1D;COMMD1;RAD23B;RBX1;RYBP;RFWD2;MDM2;TRIB3;TAF1
chaperone mediated protein folding requiring cofactor (GO:0051085)	13/24	0.00283568	0.0374883	0	0	2.09867	12.3097	HSPA9;HSPA8;HSPA5;HSPA4;PTGES3;HSPA4L;DNAJB14;HSPE1;HSPA14;HSPA13;HSPH1;DNAJC7;HYOU1
regulation of cellular senescence (GO:2000772)	13/24	0.00283568	0.0373914	0	0	2.09867	12.3097	PNPT1;NEK4;HMGA1;HMGA2;TERF2;SIRT1;RSL1D1;NUAK1;ING2;RBL1;CDK6;AKT3;EEF1E1
histone monoubiquitination (GO:0010390)	13/24	0.00283568	0.037295	0	0	2.09867	12.3097	RNF20;UHRF1;CTR9;UBE2E1;RNF2;CDC73;RNF168;DDB1;RYBP;LEO1;TRIM37;BCOR;CUL4B
protein stabilization (GO:0050821)	55/152	0.00292894	0.0384225	0	0	1.40195	8.17771	RPL5;USP36;HSP90AB1;CCNH;USP33;PTEN;PARK7;PHB2;SUMO1;CHEK2;CHORDC1;LAMP2;GTSE1;GOLGA7;CCT3;CCT2;USP7;MORC3;HSP90AA1;RPS7;FBXW7;RPL23;COG3;GTPBP4;CREB1;CDC37;TCP1;PPIB;IFT46;STX12;USP27X;STXBP4;RPL11;TAF9;WIZ;RTN4;STK3;HSPD1;TBRG1;PDCD10;CDC37L1;CCT8;CCT7;CCT5;CCT4;UBE2B;PTGES3;CCT6A;EFNA1;GNAQ;NAA16;CALR;NAA15;SUGT1;TAF1
ribosomal small subunit assembly (GO:0000028)	11/19	0.00299932	0.0392449	0	0	2.24311	13.0311	RPS15;RPS14;RPS17;RPS28;RPS27;RPS19;MRPS11;RPS27L;PWP2;MRPS7;RPS10
nucleic acid-templated transcription (GO:0097659)	31/76	0.00302808	0.03952	0	0	1.58037	9.1659	GTF3C2;GTF3C3;GTF3C4;GTF3C6;SCX;ASH2L;BAZ2B;PWP1;TAF1B;POLR2A;POLR2B;E2F1;POLR2F;POLR2G;POLR2H;POLR2J;POLR2K;BPTF;BAZ1A;BAZ1B;ILF2;TOPORS;THAP1;NR4A2;POLR3A;PAX8;RRAGC;FUBP3;DRG1;RNPS1;PTMA
regulation of cyclin-dependent protein serine/threonine kinase activity (GO:0000079)	28/67	0.00311427	0.0405412	0	0	1.61918	9.34552	PSMD10;CCNK;BLM;CDKN1B;CCNH;BCCIP;PTEN;CCNC;IPO7;CKS1B;IPO5;CCND1;CDK5RAP1;CDK5RAP3;GADD45A;PLK1;GTF2H1;CDC6;CDC25C;CDC25A;GTPBP4;LATS1;CCNE2;APC;CDC37;CKS2;MNAT1;CDKN3
cellular response to UV (GO:0034644)	28/67	0.00311427	0.040438	0	0	1.61918	9.34552	PCNA;KDM1A;FMR1;XPC;PTPRK;TRIAP1;AURKB;RUVBL2;MYC;CHEK1;N4BP1;USP47;NPM1;PARP1;RHBDD1;SIRT1;EIF2S1;CDC25A;MAPK13;DDB1;ERCC1;NEDD4;RPL26;PPID;ATF4;CUL4B;ATR;TAF1
regulation of mitotic spindle organization (GO:0060236)	17/35	0.00312504	0.0404748	0	0	1.88188	10.8553	GPSM2;VPS4B;CLTC;PLK1;HNRNPU;SMC3;SMC1A;TPX2;STAG2;CHMP1B;TPR;CHMP2B;CHMP4C;CHMP2A;TACC3;CEP97;CHMP5
intrinsic apoptotic signaling pathway (GO:0097193)	39/101	0.00313044	0.0404422	0	0	1.49608	8.62727	PPP1R15A;DDX5;DDX3X;CUL5;CUL3;CUL2;CUL1;HTRA2;BRCA1;KRCC1;TANK;RRP8;HINT1;BCL2L11;ZMAT1;AIFM1;CHEK2;E2F1;CHAC1;FNIP2;MAP3K5;BOK;MOAP1;APAF1;TNFRSF10B;POU4F1;TOPORS;MSH6;CUL4A;STK24;MYBBP1A;DDIT3;DNAJC10;JMY;BCL2;CYCS;TRIB3;EPHA2;ATF4
protein localization to chromosome (GO:0034502)	14/27	0.00335657	0.043254	0	0	2.00898	11.4448	TNKS;XRCC5;PINX1;PLK1;ATRX;TINF2;RPA1;RPA2;CTCF;CENPA;TERF2;TNKS2;RAD21;ATR
cellular response to topologically incorrect protein (GO:0035967)	14/27	0.00335657	0.043145	0	0	2.00898	11.4448	HSPA9;HSPA8;HSPA5;HSPA4;RHBDD1;HSPA4L;HSPA14;TM7SF3;HSPA13;ATXN3;UBE2W;HSPH1;HYOU1;OPTN
purine nucleoside monophosphate biosynthetic process (GO:0009127)	8/12	0.00345098	0.0442471	0	0	2.58298	14.6432	ATIC;IMPDH2;PPAT;GMPS;PAICS;PFAS;GART;ADSS
peptidyl-methionine modification (GO:0018206)	8/12	0.00345098	0.0441362	0	0	2.58298	14.6432	METAP1D;NAA30;NAA20;NAA25;NAA16;NAA15;METAP1;METAP2
regulation of sister chromatid cohesion (GO:0007063)	8/12	0.00345098	0.0440259	0	0	2.58298	14.6432	FEN1;ESPL1;CDCA5;DDX11;RAD21;CTNNB1;CTCF;BUB1
signal transduction involved in G2 DNA damage checkpoint (GO:0072425)	8/12	0.00345098	0.0439161	0	0	2.58298	14.6432	PLK1;CHEK1;UIMC1;ATM;BRCC3;BRCA1;DTL;CDC14B
protein localization to kinetochore (GO:0034501)	8/12	0.00345098	0.0438068	0	0	2.58298	14.6432	CENPT;MTBP;IK;RCC2;MIS12;CDK1;BUB1B;AURKB
pre-mRNA cleavage required for polyadenylation (GO:0098789)	8/12	0.00345098	0.0436981	0	0	2.58298	14.6432	CPSF7;CPSF6;NCBP1;FIP1L1;NCBP2;CSTF2;CSTF2T;TUT1
positive regulation of viral transcription (GO:0050434)	19/41	0.00357486	0.0451547	0	0	1.79548	10.1155	DHX9;GTF2B;TAF11;SUPT4H1;NUCKS1;RSF1;RRP1B;GTF2F1;CHD1;GTF2F2;SNW1;POLR2A;MDFIC;POLR2B;POLR2F;POLR2G;POLR2H;POLR2J;POLR2K
rRNA modification (GO:0000154)	12/22	0.00380824	0.0479839	0	0	2.11335	11.7726	NOP56;FBL;NOP58;MRPL1;DIMT1;DKC1;GAR1;NHP2;TFB2M;THUMPD1;TFB1M;FTSJ3
cellular response to unfolded protein (GO:0034620)	12/22	0.00380824	0.0478657	0	0	2.11335	11.7726	HSPA9;HSPA8;HSPH1;HSPA5;HSPA4;RHBDD1;HSPA4L;HYOU1;HSPA14;TM7SF3;HSPA13;OPTN
NLS-bearing protein import into nucleus (GO:0006607)	12/22	0.00380824	0.0477481	0	0	2.11335	11.7726	RANBP2;TRPS1;NUP35;NUP54;KPNA4;RANBP6;TNPO1;KPNA2;KPNA3;KPNB1;IPO5;KPNA1
negative regulation of DNA biosynthetic process (GO:2000279)	15/30	0.00381066	0.0476613	0	0	1.93723	10.7903	PIF1;BMPR2;PINX1;TINF2;HNRNPU;TERF1;TERF2;EXOSC10;GNL3L;XRN1;PAPD5;ANKRD1;HNRNPC;HNRNPA1;DCP2
response to ionizing radiation (GO:0010212)	31/77	0.00383457	0.0478431	0	0	1.55985	8.67854	PRKAA1;BLM;RNF8;BRCA1;BRCC3;TANK;RAD51AP1;MYC;FIGNL1;UIMC1;TOPBP1;ECT2;IKBIP;KDM4D;EYA1;XRCC4;GADD45A;INTS3;XRCC2;HUS1;LIG4;SIRT1;RNF168;RAD51C;RAD51;MSH2;EEF1D;FANCD2;RFWD2;RFWD3;ATM
regulation of cytokinesis (GO:0032465)	31/77	0.00383457	0.0477264	0	0	1.55985	8.67854	BECN1;AHCTF1;SETD2;CETN2;CUL3;KIF14;AURKB;AURKA;CDC42;SPAST;RACGAP1;CSPP1;ECT2;BBS4;E2F7;E2F8;SH3GLB1;PLK1;PRPF40A;KIF23;CDC6;RHOA;RAB11A;CIT;PRC1;CHMP4C;PIK3C3;PKN2;KIF20A;KIF20B;CALM2
cellular response to gamma radiation (GO:0071480)	10/17	0.0039796	0.0494109	0	0	2.2791	12.5956	YAP1;XRCC6;WRN;KDM1A;XRCC5;TLK2;MDM2;ATM;RPL26;ATR
microtubule nucleation (GO:0007020)	10/17	0.0039796	0.049291	0	0	2.2791	12.5956	NDE1;CENPJ;AKAP9;TUBGCP5;RANBP9;SLAIN2;CSNK1D;TUBGCP3;TUBG1;CLASP1
protein import (GO:0017038)	24/56	0.00405749	0.0501341	0	0	1.66049	9.14461	PDIA3;RANBP2;RANBP1;IPO11;POM121;NXT1;NUP107;NUP133;NUP155;CSE1L;NUP153;NXT2;IPO7;NUP93;IPO8;NUP85;NUP50;LAMP2;HEATR3;NUP88;NUP98;TNPO3;KPNB1;RAN
regulation of transcription from RNA polymerase II promoter in response to stress (GO:0043618)	36/93	0.00420815	0.0518701	0	0	1.49979	8.20497	PSMD10;PSMD12;PSMD11;PSMD14;UBE2D2;UBE2D3;CUL2;HIF1A;PSMA7;PSMD9;PSMD6;PSMD7;PSMD5;PSMD2;HSF2;CHEK1;PSMB1;PSMD1;RPS27A;RBX1;PSMA5;PSMA6;PSMA3;PSMC5;PSMA4;PSMC6;PSMA1;PSMC3;PSMA2;PSMC1;PSME4;PSMC2;PSME1;PSME2;ATF3;ATF4
peptidyl-lysine dimethylation (GO:0018027)	7/10	0.0042562	0.0523359	0	0	2.71213	14.8065	SUV39H2;SETD2;SETD3;SUV39H1;SETD7;SMYD2;ASH1L
nuclear pore complex assembly (GO:0051292)	7/10	0.0042562	0.0522101	0	0	2.71213	14.8065	NUP93;NUP205;AHCTF1;NUP107;NUP153;NUP98;RTN4
DNA replication-dependent nucleosome assembly (GO:0006335)	7/10	0.0042562	0.0520849	0	0	2.71213	14.8065	CHAF1B;CHAF1A;RBBP4;NASP;HAT1;ASF1A;ASF1B
regulation of DNA damage checkpoint (GO:2000001)	7/10	0.0042562	0.0519603	0	0	2.71213	14.8065	ETAA1;FEM1B;RFWD3;THOC1;RPA2;THOC5;WDR76
telomere maintenance via recombination (GO:0000722)	7/10	0.0042562	0.0518363	0	0	2.71213	14.8065	SNRNP40;RAD50;RAD51;ERCC1;NSMCE2;SMC5;SMC6
DNA replication-dependent nucleosome organization (GO:0034723)	7/10	0.0042562	0.0517129	0	0	2.71213	14.8065	CHAF1B;CHAF1A;RBBP4;NASP;HAT1;ASF1A;ASF1B
positive regulation of mRNA splicing, via spliceosome (GO:0048026)	7/10	0.0042562	0.05159	0	0	2.71213	14.8065	SNW1;NCBP1;THRAP3;TRA2B;CELF4;NUP98;PRDX6
protein prenylation (GO:0018342)	7/10	0.0042562	0.0514678	0	0	2.71213	14.8065	PTAR1;FNTA;PGGT1B;CHM;AIPL1;CHML;RABGGTB
regulation of protein ubiquitination involved in ubiquitin-dependent protein catabolic process (GO:2000058)	13/25	0.00452391	0.0545756	0	0	2.01472	10.8762	RPL5;RPS7;FBXW7;RPL23;RPL11;PTEN;AXIN1;PTK2;LATS1;PDCL3;RNF139;TRIM39;TAF1
regulation of phosphorylation (GO:0042325)	44/119	0.00462476	0.0556607	0	0	1.43258	7.702	ANKLE2;NUP205;POM121;NUP107;SEH1L;CDKN1B;MCM7;PRKRIP1;BCL10;PSEN1;THBS1;NUP160;SDCBP;NUP85;TPR;NUP88;NUP43;RICTOR;FNIP1;FNIP2;BARD1;RANBP2;NUP155;NUP133;KDM4D;PTGES3;GLMN;NUP153;INHBA;DYNLL1;SIRT1;PTK2;NUP93;CCDC88A;FER;NUP50;RAD17;NUP35;PHIP;NUP54;ITGA6;NUP98;NUPL2;NUP37
regulation of cell cycle (GO:0051726)	73/215	0.00464702	0.055797	0	0	1.31552	7.06634	LIN54;CDKN1B;CITED2;GMNN;HNRNPU;PTPRK;FOXM1;CKS1B;SLK;MECOM;CCND1;CHEK1;NEK1;MYBL2;FBXO5;CDK5RAP3;PHACTR4;MAP2K4;DYNLT3;OXSR1;CDC25C;MASTL;SIRT1;CDC25A;THAP1;RBL1;CKS2;BIRC5;DTL;UHRF2;STK39;TXLNG;HTRA2;IQGAP1;LIN9;STK3;SDCBP;CCNB2;PAK1;CCNB1;RPS15A;RBBP4;FIGNL1;PES1;MAP4K5;PAK3;PAK2;MAP4K3;MAP4K4;SRPK2;MAP3K2;MBD4;CDK19;TGFB2;GADD45B;NEK4;GADD45A;PLK1;NEK7;HMGA2;INHBA;CDK11B;CYLD;CENPF;WEE1;CDK6;…
ribosomal large subunit export from nucleus (GO:0000055)	6/8	0.00501994	0.0601332	0	0	2.90585	15.3846	NPM1;XPO1;RRS1;NMD3;NUP88;RAN
positive regulation of early endosome to late endosome transport (GO:2000643)	6/8	0.00501994	0.0599924	0	0	2.90585	15.3846	RAB21;MTMR2;RDX;MSN;PTPN23;EZR
positive regulation of spindle checkpoint (GO:0090232)	6/8	0.00501994	0.0598522	0	0	2.90585	15.3846	GEN1;DYNC1LI1;TPR;NDRG1;NDC80;MAD2L1
regulation of metaphase/anaphase transition of cell cycle (GO:1902099)	6/8	0.00501994	0.0597127	0	0	2.90585	15.3846	CENPE;CDC23;UBE2C;PLK1;RIOK2;CDC6
histone H2A-K119 monoubiquitination (GO:0036353)	6/8	0.00501994	0.0595738	0	0	2.90585	15.3846	PCGF6;PCGF5;PCGF3;TRIM37;BMI1;RNF2
protein desumoylation (GO:0016926)	6/8	0.00501994	0.0594356	0	0	2.90585	15.3846	SENP6;USPL1;SENP5;SENP8;SENP2;SENP3
nucleus organization (GO:0006997)	20/45	0.00511793	0.0604556	0	0	1.72199	9.08348	USP36;NUP205;SEH1L;NUP133;NUP155;VPS4B;PITPNB;LEMD3;NUP93;RPS19;CHMP1B;REEP3;TPR;CHMP2B;CHMP4C;CHMP2A;NUP35;NUP54;NUP98;CHMP5
bicellular tight junction assembly (GO:0070830)	14/28	0.00513501	0.0605173	0	0	1.93723	10.2125	PRKCI;F11R;MPP5;GRHL2;PARD6B;OCLN;DLG1;MARVELD2;APC;PARD3;MARVELD3;MICALL2;STRN;ECT2
protein K48-linked ubiquitination (GO:0070936)	21/48	0.00522183	0.0613986	0	0	1.69508	8.90748	HACE1;UBE2B;UBE2C;UBE2D2;UBE2D3;RNF8;UBE2E1;TNFAIP3;RNF6;UBE2G1;UBE2A;MARCH6;TOPORS;RNF146;RNF115;ITCH;UBE2Q2;UBE2T;UBR5;TTC3;UBE2K
protein localization to chromosome, telomeric region (GO:0070198)	9/15	0.00526875	0.0618079	0	0	2.32468	12.1952	TNKS2;XRCC5;TNKS;PINX1;ATRX;TINF2;BRCA2;TERF2;ATR
astral microtubule organization (GO:0030953)	5/6	0.00538728	0.0630534	0	0	3.22872	16.8659	DLG1;EZR;KPNB1;CLASP1;RAB11A
pyrimidine deoxyribonucleotide biosynthetic process (GO:0009221)	5/6	0.00538728	0.0629092	0	0	3.22872	16.8659	DCTD;HDDC2;DTYMK;DUT;TYMS
protein geranylgeranylation (GO:0018344)	5/6	0.00538728	0.0627655	0	0	3.22872	16.8659	FNTA;PGGT1B;CHM;CHML;RABGGTB
regulation of cell cycle checkpoint (GO:1901976)	5/6	0.00538728	0.0626226	0	0	3.22872	16.8659	ETAA1;FEM1B;RFWD3;RPA2;WDR76
monoubiquitinated protein deubiquitination (GO:0035520)	5/6	0.00538728	0.0624802	0	0	3.22872	16.8659	USP47;ATXN3;USP15;USP7;USP1
positive regulation of RNA binding (GO:1905216)	5/6	0.00538728	0.0623386	0	0	3.22872	16.8659	NCBP1;FMR1;EIF3E;EIF3C;EIF3D
N-terminal peptidyl-methionine acetylation (GO:0017196)	5/6	0.00538728	0.0621975	0	0	3.22872	16.8659	NAA30;NAA20;NAA25;NAA16;NAA15
regulation of ubiquitin-protein transferase activity (GO:0051438)	15/31	0.00564179	0.0649888	0	0	1.87474	9.70658	ZYG11B;DCUN1D5;FBXW7;FEM1B;DCUN1D4;PLK1;DCUN1D1;AXIN1;PARK7;BMI1;TOPORS;BAG5;UBE2N;TRIB3;RPS2
regulation of protein export from nucleus (GO:0046825)	15/31	0.00564179	0.0648424	0	0	1.87474	9.70658	YWHAE;BARD1;GSK3B;SETD2;PARK7;RANGAP1;SUPT6H;IWS1;XPO1;XPO4;TPR;XPO5;ANP32B;GTSE1;RBM22
organelle assembly (GO:0070925)	119/376	0.00608119	0.0697355	0	0	1.22623	6.25689	TRAF3IP1;UBXN2A;FNBP1L;PTPDC1;CDC14B;OGFOD1;POGZ;RCC1;NEK1;NEK2;VPS36;EIF2A;DYNC2H1;GABARAPL2;TMOD3;ATG9B;STX7;RC3H1;IFT80;CSNK1D;OCRL;IFT88;IFT81;CHMP4C;STAM2;DDX6;TSG101;INTU;ARL6;TNKS;ARL3;FBF1;TTBK2;KIF3A;TCTEX1D2;ATP6V1D;ATG5;NEK7;PARVA;TRAPPC8;BBIP1;STAM;SNF8;LSM3;TMEM231;ANLN;NSFL1C;AHI1;WDR60;CHMP2B;CHMP2A;LSM14A;ATG2B;TTC26;DDX3X;CEP164;CBY1;SNX10;PTPN23;BICD1;SEPT8;SEPT7;CHMP1B;RB1CC1;W…
chromosome condensation (GO:0030261)	12/23	0.00610986	0.0699072	0	0	2.02146	10.3051	TOP2A;NIPBL;AIFM1;CDCA5;PHF23;NUSAP1;NCAPG;NCAPD2;NCAPD3;SMC4;NCAPH;SMC2
regulation of microtubule cytoskeleton organization (GO:0070507)	12/23	0.00610986	0.0697508	0	0	2.02146	10.3051	GSK3B;CYLD;TRAF3IP1;TAOK1;STMN1;EFNA5;SKA3;BICD1;PHLDB2;SKA1;CLASP1;AURKA
positive regulation of transferase activity (GO:0051347)	49/137	0.00617024	0.0702828	0	0	1.38576	7.05076	HSP90AB1;NVL;DSCC1;CHTF18;BMI1;IGF1R;MYC;NEK2;RFC5;CCT2;HSP90AA1;RFC3;RFC4;FBXW7;EPHA8;RFC2;AXIN1;TOPORS;DKC1;TCP1;TYRO3;TRIB3;NAF1;EPHA1;MET;EPHA2;DDR2;LTK;DCUN1D5;TNKS;DCUN1D4;DCUN1D1;PARN;AURKB;MAPK1;RPS2;CCT4;UBE2I;XRCC5;RYK;PTGES3;PLK1;NEK7;GRHL2;RAD50;ARTN;AXL;UBE2N;SERINC1
regulation of intracellular signal transduction (GO:1902531)	132/422	0.00626641	0.0712193	0	0	1.21192	6.14752	RPL5;FAM13B;WWC1;ARHGDIG;SYDE2;CHEK2;CHEK1;IER3;SUPT16H;CSNK2A1;CSNK2A2;HUS1;OCRL;VRK2;TIAM2;RINT1;TIAM1;DEPDC1B;RRAGC;DNA2;SQSTM1;OPTN;BLM;NOP2;ARHGAP19;ARHGAP18;RPF2;ARHGAP12;ARHGAP21;NUAK1;BRIP1;RHOT1;RACGAP1;RRS1;SMYD2;PIP5K1A;SRGAP3;SRGAP2;ECT2;FAM83D;BARD1;TGFB2;INHBA;CYLD;TPX2;ARHGAP32;ARTN;CDK2;JMY;MDM2;RAD17;ATM;ATR;ARHGAP11A;ARHGAP8;PHF20;GDI2;CHD4;BRCA1;ARHGAP5;ING5;SPRED1;AKAP11;EXO1;…
negative regulation of DNA metabolic process (GO:0051053)	19/43	0.00678073	0.0768935	0	0	1.71197	8.54903	ZRANB3;BLM;RTEL1;BMPR2;GMNN;CDC6;PDS5A;TERF1;TERF2;GTPBP4;MSH6;MSH2;MSH3;ERCC1;ANKRD1;RPS3;RAD17;S100A11;ATR
tRNA modification (GO:0006400)	24/58	0.00688947	0.0779534	0	0	1.60323	7.98049	PUS3;TRUB1;PUS10;SSB;OSGEPL1;NSUN2;PUS1;WDR4;THUMPD3;NSUN6;CDKAL1;THUMPD1;THADA;THG1L;ALKBH8;TARBP1;ADAT2;RPUSD4;YRDC;ALKBH1;TRMT6;CDK5RAP1;SEPHS1;AARS
establishment of mitotic spindle localization (GO:0040001)	10/18	0.00689795	0.0778767	0	0	2.15248	10.7119	GPSM2;ESPL1;NDE1;NUSAP1;CENPA;NDC80;KPNB1;CLASP1;CDK5RAP2;PAFAH1B1
ubiquitin-dependent protein catabolic process via the multivesicular body sorting pathway (GO:0043162)	10/18	0.00689795	0.0777047	0	0	2.15248	10.7119	TOM1L1;RNF115;TSG101;VPS4B;NEDD4;PLAA;VPS37A;PTPN23;SNF8;VPS36
tRNA metabolic process (GO:0006399)	10/18	0.00689795	0.0775336	0	0	2.15248	10.7119	SSB;KARS;POP1;RPP30;ADAT1;SARS;DARS2;DTD1;THG1L;AARS
signal transduction involved in DNA damage checkpoint (GO:0072422)	8/13	0.00694878	0.0779333	0	0	2.38429	11.848	PLK1;CHEK1;UIMC1;CDC5L;BRCC3;BRCA1;DTL;CDC14B
tetrahydrofolate metabolic process (GO:0046653)	8/13	0.00694878	0.0777624	0	0	2.38429	11.848	DHFR;MTHFD1L;MTHFD1;SHMT2;MTHFD2;SHMT1;ATPIF1;TYMS
negative regulation of ubiquitin-protein transferase activity (GO:0051444)	8/13	0.00694878	0.0775922	0	0	2.38429	11.848	RPL5;BAG5;RPS7;USP44;RPL23;RPL11;PARK7;MAD2L1
mitotic DNA integrity checkpoint (GO:0044774)	8/13	0.00694878	0.0774228	0	0	2.38429	11.848	TOP2A;TOP2B;CHEK2;HUS1;RAD17;CLSPN;TOPBP1;NAE1
mRNA cleavage involved in mRNA processing (GO:0098787)	8/13	0.00694878	0.0772541	0	0	2.38429	11.848	CPSF7;CPSF6;NCBP1;FIP1L1;NCBP2;CSTF2;CSTF2T;TUT1
retrograde vesicle-mediated transport, Golgi to ER (GO:0006890)	31/80	0.00741577	0.0822667	0	0	1.50136	7.36287	COPB2;COPA;PITPNB;COPB1;KIF11;KLC1;KIF15;SCFD1;RACGAP1;KIF3B;KIF3A;BNIP1;KIF3C;TMED7;KIFAP3;RAB6B;TMED9;COG3;GOLPH3L;KIF23;KIF22;ARCN1;RINT1;CENPE;KIF18A;KIF2A;PICK1;KIF2C;COPG2;SEC22B;ERGIC2
Wnt signaling pathway (GO:0016055)	40/109	0.00774013	0.0856788	0	0	1.42182	6.91196	VPS29;GSK3B;DDX3X;ARL6;TNKS;USP34;CUL1;PTEN;KLHL12;VPS26A;PSEN1;TNKS2;MYC;PLCG2;DVL2;VPS35;RPS27A;WLS;CSNK1G3;WNT10A;FZD3;UBE2B;RYK;CSNK1A1;WNT7B;FZD6;AXIN1;WNT7A;VRK1;VRK2;RBX1;NR4A2;RNF146;PPM1A;APC;PTK7;CPE;CTNNB1;STRN;CSNK1G1
positive regulation of transcription from RNA polymerase I promoter (GO:0045943)	11/21	0.00827163	0.0913639	0	0	2.02948	9.73122	UTP15;DDX11;NCL;MARS;HEATR1;UBTF;WDR75;NOL11;WDR43;TAF1;ATF4
RNA-dependent DNA biosynthetic process (GO:0006278)	11/21	0.00827163	0.0911666	0	0	2.02948	9.73122	HSP90AA1;RAD50;HSP90AB1;RFC1;DKC1;PTGES3;PINX1;GAR1;NHP2;TERF1;PPIA
regulation of cyclin-dependent protein kinase activity (GO:1904029)	16/35	0.00851391	0.0936346	0	0	1.77119	8.44156	BLM;CCNK;CDKN1B;GADD45A;BCCIP;PTEN;GTF2H1;CDC6;CDC25C;CDC25A;GTPBP4;CCNE2;CDC37;MNAT1;CDK5RAP3;CDKN3
positive regulation of DNA repair (GO:0045739)	17/38	0.00879697	0.0965397	0	0	1.73331	8.20438	PCNA;EYA1;PARP1;DHX9;DDX11;CEBPG;RNF8;HMGB1;BRCC3;BRCA1;FOXM1;SIRT1;RNF168;UIMC1;RPS3;TIMELESS;UBE2N
positive regulation of gene expression (GO:0010628)	228/771	0.0090073	0.0986357	0	0	1.14576	5.39619	ATF2;RPL5;EIF4A3;SCX;PSMD9;MYC;CHEK2;VPS35;CDK5RAP2;ACVR1;SMARCC1;RPL23;WDR75;CD3EAP;MED4;PASK;NIF3L1;KARS;DDIT3;TFAM;RPL26;EZR;ATF4;GATA4;BCL10;HIF1A;FXR1;NUP85;PDCD10;SRPK2;XRCC6;RDX;H3F3A;SMARCA5;TRIP4;UPF3B;UPF3A;NR1D2;SNF8;LARP4;SETX;FUBP3;FUBP1;HNRNPD;SETD3;CITED2;RSF1;CTCF;BRCA1;BRCA2;WDR43;GLI3;MED17;ING5;PPP3CB;ING2;MED13;MECOM;SPIN1;RIOK2;RIOK1;TEAD1;GABPA;WARS;NCOA4;PAX6;TFB2M;BAZ1B;PA…
posttranscriptional regulation of gene expression (GO:0010608)	19/44	0.00909348	0.0993662	0	0	1.67307	7.86374	TRIM71;MTPN;CYFIP1;DDX6;CDC123;RPL10;YTHDC1;NOLC1;RC3H1;PARP9;PUM2;RBM3;TCOF1;ZC3H7A;GEMIN5;MATR3;EIF4E;METAP1;EIF2A
positive regulation of viral process (GO:0048524)	19/44	0.00909348	0.0991539	0	0	1.67307	7.86374	TSG101;STAU1;DHX9;VPS4B;GTF2B;SUPT4H1;RSF1;GTF2F1;GTF2F2;DDB1;POLR2A;MDFIC;POLR2B;POLR2F;POLR2G;POLR2H;PPIB;POLR2J;POLR2K
formation of extrachromosomal circular DNA (GO:0001325)	7/11	0.00910198	0.099035	0	0	2.46557	11.5864	BLM;WRN;ARTN;EXO1;ERCC1;DNA2;TERF1
endonucleolytic cleavage of tricistronic rRNA transcript (SSU-rRNA, 5.8S rRNA, LSU-rRNA) (GO:0000479)	7/11	0.00910198	0.0988243	0	0	2.46557	11.5864	RCL1;NOP14;BMS1;RRS1;TSR1;UTP20;KRI1
negative regulation of cell division (GO:0051782)	7/11	0.00910198	0.0986145	0	0	2.46557	11.5864	BLM;ORC6;MYC;CHMP4C;E2F7;AURKB;E2F8
negative regulation of nucleocytoplasmic transport (GO:0046823)	7/11	0.00910198	0.0984056	0	0	2.46557	11.5864	BARD1;MDFIC;TPR;CHORDC1;NUP153;PARK7;RANGAP1
t-circle formation (GO:0090656)	7/11	0.00910198	0.0981975	0	0	2.46557	11.5864	BLM;WRN;ARTN;EXO1;ERCC1;DNA2;TERF1
telomere maintenance via telomere trimming (GO:0090737)	7/11	0.00910198	0.0979903	0	0	2.46557	11.5864	BLM;WRN;ARTN;EXO1;ERCC1;DNA2;TERF1
isotype switching (GO:0045190)	7/11	0.00910198	0.097784	0	0	2.46557	11.5864	RNF168;MSH6;MSH2;RNF8;LIG4;EXOSC3;HSPD1
negative regulation of protein ubiquitination involved in ubiquitin-dependent protein catabolic process (GO:2000059)	7/11	0.00910198	0.0975786	0	0	2.46557	11.5864	RPL5;PDCL3;RPS7;TRIM39;RPL23;RPL11;TAF1
proteasome assembly (GO:0043248)	7/11	0.00910198	0.0973741	0	0	2.46557	11.5864	PSMD10;PSMD9;PSMD11;PSMD5;POMP;PSMG1;PSMG2
positive regulation of receptor biosynthetic process (GO:0010870)	7/11	0.00910198	0.0971703	0	0	2.46557	11.5864	EDN1;HDAC2;HNRNPK;HDAC1;CNPY2;HIF1A;HOXA5
negative regulation of protein ubiquitination (GO:0031397)	21/50	0.00911816	0.0971399	0	0	1.62728	7.64411	RPL5;UBXN1;RPS7;RPL23;PINX1;RPL11;TNFAIP3;ISG15;PARK7;SENP2;GTPBP4;DNAJA1;PDCL3;BAG5;GNL3L;TRIM39;CHORDC1;RPS3;SPOPL;N4BP1;TAF1
cellular response to heat (GO:0034605)	20/47	0.00913405	0.0971063	0	0	1.64871	7.74192	YWHAE;HSPA9;HSPA8;HSPA5;HSPA4;HSPA4L;HTRA2;HSPA14;THBS1;HSPA13;ATXN3;IL1A;HSPH1;SUMO1;HSF2;TRPV4;TPR;HYOU1;RBBP7;SLU7
negative regulation of DNA recombination (GO:0045910)	9/16	0.00930534	0.0987217	0	0	2.17939	10.1934	ZRANB3;MSH6;INSL6;BLM;RTEL1;HELB;MSH2;MSH3;POLK
histone H2A acetylation (GO:0043968)	9/16	0.00930534	0.0985169	0	0	2.17939	10.1934	MORF4L1;ING3;MORF4L2;RUVBL2;ACTL6A;RUVBL1;MSL3;YEATS4;BRD8
negative regulation of proteasomal ubiquitin-dependent protein catabolic process (GO:0032435)	12/24	0.00938405	0.0991446	0	0	1.93723	9.04445	USP14;SDCBP;USP7;UBXN1;HSP90AB1;RYBP;BAG5;TAF9;RPL11;TLK2;PARK7;N4BP1
cellular response to fibroblast growth factor stimulus (GO:0044344)	35/94	0.00949708	0.100131	0	0	1.44262	6.71796	CEP57;TRIM71;PTBP1;SPRED1;POLR2A;FLRT3;POLR2B;FLRT1;POLR2F;MAPK1;SHOC2;POLR2G;POLR2H;RPS27A;HNRNPA1;POLR2J;POLR2K;FGFBP1;TIA1;NCBP1;GALNT3;NCBP2;FRS2;PTPN11;GTF2F1;GTF2F2;SHCBP1;FGF17;SETX;HNRNPM;KIF16B;HNRNPH1;ESRP1;HNRNPF;CD44
transcription from RNA polymerase III promoter (GO:0006383)	13/27	0.0102552	0.107901	0	0	1.86548	8.54387	IVNS1ABP;GTF3C2;GTF3C3;GTF3C4;CRCP;TBP;GTF3C6;ZC3H8;TROVE2;SNAPC1;POLR3G;POLR3K;POLR2K
positive regulation of protein insertion into mitochondrial membrane involved in apoptotic signaling pathway (GO:1900740)	14/30	0.0109139	0.114596	0	0	1.80808	8.16841	YWHAE;YWHAB;DYNLL1;YWHAZ;CASP8;BCL2L11;TFDP1;YWHAQ;TFDP2;E2F1;BCL2;NMT1;BID;YWHAH
regulation of protein insertion into mitochondrial membrane involved in apoptotic signaling pathway (GO:1900739)	14/30	0.0109139	0.114361	0	0	1.80808	8.16841	YWHAE;YWHAB;DYNLL1;YWHAZ;CASP8;BCL2L11;TFDP1;YWHAQ;TFDP2;E2F1;BCL2;NMT1;BID;YWHAH
stimulatory C-type lectin receptor signaling pathway (GO:0002223)	43/121	0.0111091	0.116167	0	0	1.37688	6.19594	PSMD10;PSMD12;PSMD11;PSMD14;UBE2D2;CUL1;BCL10;PSMA7;PSMD9;PSMD6;NRAS;PAK1;PSMD7;RPS6KA5;PSMD5;PSMD2;PSMB1;PLCG2;PSMD1;IKBKG;PAK3;RPS27A;PRKACB;PAK2;CHUK;PSMA5;PSMA6;PSMA3;PSMC5;PSMA4;PSMC6;PSMA1;PSMC3;PSMA2;PSMC1;PSME4;PSMC2;PSME1;UBE2N;PSME2;TAB3;TAB2;KRAS
mRNA stabilization (GO:0048255)	15/33	0.0113907	0.118868	0	0	1.76112	7.88095	DHX9;HNRNPU;YBX1;ELAVL1;TIRAP;SYNCRIP;LARP1;GDNF;THRAP3;E2F1;IGF2BP1;HNRNPC;PABPC1;TARDBP;PAIP1
ATF6-mediated unfolded protein response (GO:0036500)	6/9	0.0117711	0.122588	0	0	2.58298	11.4739	HSPA5;DDIT3;CALR;ATF6;MBTPS2;HSP90B1
somatic recombination of immunoglobulin genes involved in immune response (GO:0002204)	6/9	0.0117711	0.122338	0	0	2.58298	11.4739	RNF168;MSH6;MSH2;RNF8;LIG4;EXOSC3
DNA topological change (GO:0006265)	6/9	0.0117711	0.122089	0	0	2.58298	11.4739	TOP2A;TOP2B;TOP1MT;HMGB2;HMGB1;TOP1
negative regulation of DNA-templated transcription, elongation (GO:0032785)	6/9	0.0117711	0.121842	0	0	2.58298	11.4739	RNF168;SUPT4H1;AXIN1;RNF8;HNRNPU;EAPP
cilium organization (GO:0044782)	64/192	0.0118449	0.122357	0	0	1.29149	5.72886	TTC26;TRAF3IP1;CEP164;CBY1;SNX10;PTPN23;FNBP1L;PTPDC1;CDC14B;SEPT8;SEPT7;WDR5;NEK1;BBS7;IFT57;CC2D2A;BBS5;CEP290;SNAP29;BBS4;DYNC2H1;OFD1;ACTR3;IQCB1;ABCC4;ACTR2;KIF24;IFT80;OCRL;DYNLL1;WDR35;KIF27;SEPT2;IFT88;IFT81;TRIM59;MNS1;IFT46;SSX2IP;INTU;ARL6;ARL3;FBF1;ASAP1;TTBK2;IFT74;ARL13B;KIF3A;RAB23;TCTEX1D2;ATP6V1D;CEP78;SEPT10;SEPT11;WDR19;SCLT1;PARVA;BBIP1;TMEM231;AHI1;TTC8;WDR60;HYLS1;CLUAP1
cellular macromolecule catabolic process (GO:0044265)	20/48	0.0119285	0.122972	0	0	1.61436	7.14972	MGEA5;RNASEH2B;MANBA;RNASEH2A;PNPT1;DIS3;FBXO2;PABPC4;HTRA2;UBE2G1;EXOSC7;SUPV3L1;TATDN1;CHEK2;RAB12;PPP1R8;XRN2;HNRNPD;RIPK1;SKIV2L2
necroptotic process (GO:0070266)	8/14	0.0125731	0.129356	0	0	2.21398	9.68881	CYLD;MLKL;PGAM5;RIPK1;TRPM7;DNM1L;TLR4;TLR3
purine-containing compound biosynthetic process (GO:0072522)	11/22	0.012735	0.130758	0	0	1.93723	8.45292	PRPS1;MTHFD1L;MTHFD1;SHMT1;PPAT;ADK;GMPS;PAICS;DCK;ADA;APRT
protein complex localization (GO:0031503)	11/22	0.012735	0.130496	0	0	1.93723	8.45292	TTC26;IFT74;DLG1;SEH1L;MIOS;TRAF3IP1;IFT81;BIRC5;IFT57;EZR;IFT46
regulation of DNA damage response, signal transduction by p53 class mediator (GO:0043516)	12/25	0.0138703	0.141844	0	0	1.85974	7.95599	PSMD10;DDX5;SPRED1;KDM1A;ANKRD1;SMYD2;MDM2;ATM;EEF1E1;SIRT1;CD44;ATR
protein K11-linked ubiquitination (GO:0070979)	13/28	0.0146927	0.149953	0	0	1.79886	7.59192	UBE2B;UBE2C;UBE2D3;UBE2A;ANAPC10;UBE2W;CDC23;UBE2S;UBE2T;CDC27;CDC16;ANAPC4;ANAPC1
production of miRNAs involved in gene silencing by miRNA (GO:0035196)	13/28	0.0146927	0.149654	0	0	1.79886	7.59192	TRIM71;SMAD2;ZCCHC11;SMAD3;NCBP1;SRRT;DICER1;PUM2;MRPL44;ZC3H7A;HNRNPA2B1;DROSHA;DGCR8
protein export from nucleus (GO:0006611)	13/28	0.0146927	0.149356	0	0	1.79886	7.59192	EIF5A;CSE1L;STYX;XPO7;XPO1;XPO4;CHORDC1;XPO5;NUP88;CALR;CCHCR1;NUPL2;RAN
RNA phosphodiester bond hydrolysis (GO:0090501)	13/28	0.0146927	0.149059	0	0	1.79886	7.59192	POP1;CSTF3;RPP30;CPSF3;PARN;DICER1;MRPL44;WDR33;MRPL1;NOB1;XRN1;PCF11;NHP2
negative regulation of proteasomal protein catabolic process (GO:1901799)	13/28	0.0146927	0.148763	0	0	1.79886	7.59192	USP25;GABARAPL2;USP7;UBXN1;HSP90AB1;TAF9;RPL11;PARK7;SDCBP;BAG5;RYBP;TLK2;N4BP1
modulation by symbiont of host cellular process (GO:0044068)	5/7	0.0148345	0.149902	0	0	2.76748	11.6533	KPNA4;KPNA2;KPNA3;KPNB1;KPNA1
negative regulation of transcription elongation from RNA polymerase II promoter (GO:0034244)	5/7	0.0148345	0.149606	0	0	2.76748	11.6533	RNF168;AXIN1;RNF8;HNRNPU;EAPP
cellular response to hydroxyurea (GO:0072711)	5/7	0.0148345	0.149311	0	0	2.76748	11.6533	BLM;FMR1;DDX11;ATRX;TIMELESS
positive regulation of mitotic cell cycle spindle assembly checkpoint (GO:0090267)	5/7	0.0148345	0.149017	0	0	2.76748	11.6533	GEN1;DYNC1LI1;TPR;NDC80;MAD2L1
regulation of microtubule binding (GO:1904526)	5/7	0.0148345	0.148724	0	0	2.76748	11.6533	PPP2CB;MAPRE1;GTSE1;GAS8;TTBK2
cleavage furrow formation (GO:0036089)	5/7	0.0148345	0.148432	0	0	2.76748	11.6533	SPIRE2;SPIRE1;SNX9;RHOA;AURKB
ribosomal protein import into nucleus (GO:0006610)	5/7	0.0148345	0.148142	0	0	2.76748	11.6533	RPL23;TNPO1;RANBP6;KPNB1;IPO5
negative regulation of telomere capping (GO:1904354)	5/7	0.0148345	0.147852	0	0	2.76748	11.6533	RAD50;ARTN;ERCC1;ATM;TERF2
nucleobase-containing small molecule interconversion (GO:0015949)	14/31	0.0152557	0.151754	0	0	1.74976	7.31889	DTYMK;DUT;RRM1;RRM2;TXNRD1;GSR;NME2;AK4;TYMS;NME1;DCTD;NME6;RRM2B;NME7
positive regulation of transcription initiation from RNA polymerase II promoter (GO:0060261)	9/17	0.0152968	0.151867	0	0	2.05119	8.57419	PSMC5;PSMC6;PSMC3;GTF2B;SUB1;PSMC1;PSMC2;GTF2F2;TAF1
positive regulation of signal transduction by p53 class mediator (GO:1901798)	9/17	0.0152968	0.151572	0	0	2.05119	8.57419	DDX5;SPRED1;RPS7;RPL23;ANKRD1;ATM;EEF1E1;CDK5RAP3;ATR
regulation of transcription from RNA polymerase I promoter (GO:0006356)	9/17	0.0152968	0.151278	0	0	2.05119	8.57419	UTP15;MBD4;HEATR1;UBTF;WDR75;WDR43;POLR2K;TAF1;ATF4
regulation of early endosome to late endosome transport (GO:2000641)	9/17	0.0152968	0.150986	0	0	2.05119	8.57419	RAB21;MTMR2;RDX;SNX12;MSN;MAPK1;DNAJC13;PTPN23;EZR
mitotic G2 DNA damage checkpoint (GO:0007095)	9/17	0.0152968	0.150694	0	0	2.05119	8.57419	FANCI;BLM;ARTN;TAOK1;HMGA2;ATM;CLSPN;TOPBP1;CDK5RAP3
N-terminal protein amino acid modification (GO:0031365)	9/17	0.0152968	0.150404	0	0	2.05119	8.57419	NAA50;METAP1D;NAA30;NAA20;NAA35;NAA16;NAA15;METAP1;METAP2
protein autoubiquitination (GO:0051865)	20/49	0.0153618	0.150752	0	0	1.58142	6.60379	TRIM71;RNF13;UHRF2;UBE2B;UHRF1;UBE2D2;UBE2D3;RNF8;BRCA1;UBE2A;TANK;MARCH5;RNF146;RNF115;ITCH;UBE2T;MDM2;ERCC8;TRIM37;RAD18
cellular response to interleukin-12 (GO:0071349)	19/46	0.0155928	0.152725	0	0	1.60032	6.65886	HSPA9;RALA;GSTO1;RPLP0;MSN;LMNB1;CDC42;RAP1B;MTAP;CAPZA1;HNRNPF;TCP1;HNRNPA2B1;PDCD4;PSME2;SNRPA1;JAK2;PAK2;PPIA
interleukin-12-mediated signaling pathway (GO:0035722)	19/46	0.0155928	0.152433	0	0	1.60032	6.65886	HSPA9;RALA;GSTO1;RPLP0;MSN;LMNB1;CDC42;RAP1B;MTAP;CAPZA1;HNRNPF;TCP1;HNRNPA2B1;PDCD4;PSME2;SNRPA1;JAK2;PAK2;PPIA
histone acetylation (GO:0016573)	27/71	0.0156378	0.15258	0	0	1.47339	6.12645	TAF9;YEATS4;BRCA2;TAF5L;ING5;ING3;RUVBL2;RUVBL1;WDR5;MBIP;BEND3;BRD8;NAA50;BRD1;DR1;TAF12;ACTL6A;MSL3;ELP3;ELP4;SUPT3H;POLE4;MORF4L1;TADA2A;MORF4L2;HAT1;POLE3
protein peptidyl-prolyl isomerization (GO:0000413)	16/37	0.0157854	0.153727	0	0	1.67545	6.95087	FKBP11;PPIL1;PPWD1;CWC27;FKBP1A;PPIE;PPIH;PPIG;PPIL3;FKBP4;PPIB;PPIA;PPIL4;FKBP3;PPID;FKBP5
positive regulation of mitochondrial outer membrane permeabilization involved in apoptotic signaling pathway (GO:1901030)	16/37	0.0157854	0.153434	0	0	1.67545	6.95087	YWHAE;GSK3B;YWHAB;DYNLL1;YWHAZ;CASP8;BCL2L11;TFDP1;YWHAQ;TFDP2;E2F1;BCL2;NMT1;BID;BOK;YWHAH
peptidyl-proline modification (GO:0018208)	17/40	0.0158252	0.153528	0	0	1.64665	6.82726	FKBP11;PPIL1;PPWD1;CWC27;FKBP1A;OGFOD1;PPIE;PPIH;PPIG;PPIL3;FKBP4;PPIB;PPIA;PPIL4;FKBP3;PPID;FKBP5
protein catabolic process (GO:0030163)	30/81	0.0168002	0.162678	0	0	1.43499	5.86389	VCP;HTRA2;IDE;PSMA7;CHEK2;LAMP2;PSMB1;RIPK1;SOCS6;ATE1;MGEA5;HSPA8;HSP90AA1;MANBA;FBXO2;PRSS16;UBE2G1;UCHL3;MARCH6;CLPX;BACE1;DDB1;PSMA5;PSMA6;PSMA3;PSMA4;PSMA1;PSMA2;RAB12;CUL4B
regulation of intrinsic apoptotic signaling pathway in response to DNA damage by p53 class mediator (GO:1902165)	7/12	0.0170134	0.164431	0	0	2.26011	9.20711	ING2;KDM1A;TAF9;TRIAP1;RPL26;SIRT1;CD44
alternative mRNA splicing, via spliceosome (GO:0000380)	7/12	0.0170134	0.16412	0	0	2.26011	9.20711	RBM17;HNRNPM;DDX5;DHX9;SRSF1;CELF4;SLU7
exit from mitosis (GO:0010458)	7/12	0.0170134	0.16381	0	0	2.26011	9.20711	EPS8;SPAST;UBE2C;UBE2S;PPP2R2D;CHMP2A;CLASP1
establishment of protein localization to mitochondrial membrane (GO:0090151)	7/12	0.0170134	0.163502	0	0	2.26011	9.20711	HSP90AA1;SAMM50;HSPA4;TIMM9;TOMM7;TIMM22;TOMM22
regulation of catabolic process (GO:0009894)	7/12	0.0170134	0.163194	0	0	2.26011	9.20711	ITGB1;FAF1;CHEK2;ODC1;MDM2;SNF8;FAM83D
rRNA 3'-end processing (GO:0031125)	7/12	0.0170134	0.162888	0	0	2.26011	9.20711	EXOSC7;ERI1;ERI2;EXOSC9;EXOSC8;EXOSC3;EXOSC2
regulation of DNA-templated transcription, elongation (GO:0032784)	10/20	0.0173381	0.165686	0	0	1.93723	7.85519	SUPT16H;SUPT4H1;THOC1;ZNF326;ERCC6;HTATSF1;THOC5;ZMYND11;IWS1;HMGN1
telomere maintenance via telomerase (GO:0007004)	10/20	0.0173381	0.165376	0	0	1.93723	7.85519	HSP90AA1;RAD50;HSP90AB1;RFC1;DKC1;PTGES3;PINX1;GAR1;NHP2;TERF1
establishment of protein localization to organelle (GO:0072594)	24/62	0.0173716	0.165386	0	0	1.49979	6.07855	PDIA3;RANBP2;RANBP1;IPO11;POM121;NXT1;NUP107;NUP133;NUP155;CSE1L;NUP153;NXT2;IPO7;RAB11A;NUP93;IPO8;NUP85;NUP50;HEATR3;NUP88;NUP98;TNPO3;KPNB1;RAN
positive regulation of type I interferon production (GO:0032481)	24/62	0.0173716	0.165078	0	0	1.49979	6.07855	SETD2;XRCC6;DDX3X;CRCP;DHX9;PRKDC;XRCC5;HSPD1;TBK1;POLR3A;POLR3B;POLR3D;POLR1C;DHX36;POLR3F;POLR2F;POLR3G;CTNNB1;LRRFIP1;POLR2H;TLR4;POLR3K;TLR3;POLR2K
innate immune response activating cell surface receptor signaling pathway (GO:0002220)	43/124	0.0174146	0.165179	0	0	1.34357	5.44204	PSMD10;PSMD12;PSMD11;PSMD14;UBE2D2;CUL1;BCL10;PSMA7;PSMD9;PSMD6;NRAS;PAK1;PSMD7;RPS6KA5;PSMD5;PSMD2;PSMB1;PLCG2;PSMD1;IKBKG;PAK3;RPS27A;PRKACB;PAK2;CHUK;PSMA5;PSMA6;PSMA3;PSMC5;PSMA4;PSMC6;PSMA1;PSMC3;PSMA2;PSMC1;PSME4;PSMC2;PSME1;UBE2N;PSME2;TAB3;TAB2;KRAS
regulation of canonical Wnt signaling pathway (GO:0060828)	69/213	0.0182722	0.172993	0	0	1.25511	5.02342	INVS;GSK3B;DDX3X;CTNND1;LRRK1;USP34;GLI3;PSMD9;PSMD6;PSMD7;PSMD5;PSMD2;RUVBL2;RUVBL1;PSMD1;SCYL2;WLS;USP8;USP47;AXIN1;CSNK1D;RBX1;PSMA5;LATS1;PSMA6;PSMA3;PSMA4;PSMA1;SDHAF2;PSMA2;TBL1XR1;DDIT3;PSME4;PSME1;PSME2;PSMD10;VCP;PSMD12;PSMD11;PSMD14;TNKS;HDAC1;CUL3;XIAP;KLHL12;PSEN1;MLLT3;PSMA7;STK3;ZNRF3;TNKS2;PSMB1;UBR5;DVL2;TBL1X;RPS27A;SMURF2;CSNK1A1;FZD6;WNT7A;RNF146;CYLD;PSMC5;PSMC6;PSMC3;APC;PSMC…
protein K48-linked deubiquitination (GO:0071108)	11/23	0.0188081	0.177737	0	0	1.85301	7.36286	OTUD4;USP25;USP8;VCPIP1;ATXN3;USP37;USP27X;USP33;USP34;OTUD7B;TNFAIP3
mitotic G2/M transition checkpoint (GO:0044818)	11/23	0.0188081	0.177408	0	0	1.85301	7.36286	FANCI;BLM;ARTN;TAOK1;HUS1;HMGA2;RAD17;CLSPN;TOPBP1;NAE1;CDK5RAP3
regulation of organelle assembly (GO:1902115)	19/47	0.0199755	0.188072	0	0	1.56627	6.12922	NPM1;STIL;TSG101;PLK2;RDX;SPICE1;MSN;STAM;SENP6;DYNC2LI1;CYLD;IFT88;CENPJ;TCTEX1D2;TBC1D12;EZR;CEP76;RAB5A;ATG5
cortical cytoskeleton organization (GO:0030865)	13/29	0.0204562	0.192243	0	0	1.73683	6.75535	NCKAP1;ROCK1;ROCK2;RTKN2;RHOBTB3;CDC42;ANLN;DLG1;FMNL2;PPP2R3C;TRPV4;RHOU;EZR
positive regulation of cellular protein localization (GO:1903829)	25/66	0.0205563	0.192829	0	0	1.4676	5.70103	GSK3B;HSP90AB1;PARK7;BICD1;RTN4;PDCD10;TPR;CEP250;STX3;CEP290;GTSE1;CDK5RAP3;CARD10;CDT1;PLK1;LIF;PARP9;NDC80;GNL3;CCDC88A;GNL3L;APC;CDK1;KIF20B;CENPQ
cellular response to hypoxia (GO:0071456)	45/132	0.0208288	0.195027	0	0	1.32084	5.11353	PSMD10;SUV39H2;PSMD12;PSMD11;PSMD14;UBE2D2;SUV39H1;UBE2D3;CUL2;HP1BP3;PTGS2;NDRG1;HIF1A;PSMA7;PSMD9;NPEPPS;PSMD6;PSMD7;PSMD5;FAM162A;MYC;PSMD2;PSMB1;PGK1;PSMD1;RPS27A;BNIP3L;SIRT1;RBX1;PSMA5;PSMA6;PSMA3;PSMC5;PSMA4;PSMC6;PSMA1;PSMC3;PSMA2;PSMC1;PSME4;PSMC2;PSME1;MDM2;PSME2;HYOU1
negative regulation of cell aging (GO:0090344)	8/15	0.020921	0.19553	0	0	2.06638	7.99071	RBL1;CDK6;AKT3;HMGA2;FOXM1;TERF2;SIRT1;MARCH5
regulation of exit from mitosis (GO:0007096)	8/15	0.020921	0.195173	0	0	2.06638	7.99071	ANLN;NPM2;CDC23;UBE2C;CDCA5;KNTC1;PHB2;CDC14B
protein localization to chromosome, centromeric region (GO:0071459)	8/15	0.020921	0.194817	0	0	2.06638	7.99071	MTBP;IK;MIS12;CDK1;BUB1B;CTCF;CENPA;AURKB
regulation of glycolytic process (GO:0006110)	22/57	0.0229465	0.21329	0	0	1.49541	5.64455	RANBP2;NUP205;PRKAA1;POM121;NUP107;SEH1L;NUP133;NUP155;NUP153;HIF1A;NUP160;NUP93;NUP85;NUP50;TPR;NUP35;NUP54;NUP43;NUP88;NUP98;NUPL2;NUP37
positive regulation of cytoplasmic transport (GO:1903651)	6/10	0.0230435	0.213802	0	0	2.32468	8.76491	RAB21;MTMR2;RDX;MSN;PTPN23;EZR
regulation of Arp2/3 complex-mediated actin nucleation (GO:0034315)	6/10	0.0230435	0.213414	0	0	2.32468	8.76491	CYFIP1;NCKAP1;ABI2;PICK1;ARFIP1;WASF1
mitotic G1 DNA damage checkpoint (GO:0031571)	6/10	0.0230435	0.213027	0	0	2.32468	8.76491	CCND1;PRKDC;RFWD3;CDK2;RPA2;RPS27L
telomere maintenance in response to DNA damage (GO:0043247)	6/10	0.0230435	0.212642	0	0	2.32468	8.76491	DCLRE1B;INSL6;DCLRE1A;RTEL1;APEX1;TERF2
negative regulation of centrosome duplication (GO:0010826)	6/10	0.0230435	0.212258	0	0	2.32468	8.76491	NPM1;CCNF;TRIM37;BRCA1;CDK5RAP2;MDM1
regulation of mRNA 3'-end processing (GO:0031440)	6/10	0.0230435	0.211876	0	0	2.32468	8.76491	BARD1;NCBP1;NCBP2;LEO1;PAPOLA;CDC73
telomeric loop disassembly (GO:0090657)	6/10	0.0230435	0.211495	0	0	2.32468	8.76491	RECQL4;BLM;WRN;RTEL1;TERF1;TERF2
histone H2B ubiquitination (GO:0033523)	6/10	0.0230435	0.211115	0	0	2.32468	8.76491	RNF20;CTR9;LEO1;UBE2E1;RNF8;CDC73
regulation of DNA-templated transcription, initiation (GO:2000142)	6/10	0.0230435	0.210737	0	0	2.32468	8.76491	FOSL1;SETX;BCLAF1;CTNNB1;TAF7;TAF1
regulation of adherens junction organization (GO:1903391)	9/18	0.0236957	0.216313	0	0	1.93723	7.25002	SLK;ROCK1;ROCK2;RDX;PTPN23;EFNA5;RHOA;PTK2;CLASP1
nuclear envelope reassembly (GO:0031468)	9/18	0.0236957	0.215927	0	0	1.93723	7.25002	NSFL1C;ANKLE2;SPAST;UBXN2A;REEP3;CHMP2A;VRK1;PPP2R2A;BANF1
DNA conformation change (GO:0071103)	9/18	0.0236957	0.215542	0	0	1.93723	7.25002	TOP2A;TOP2B;TOP1MT;HAT1;HMGB2;HMGB3;ASH1L;HMGB1;TOP1
establishment of epithelial cell polarity (GO:0090162)	9/18	0.0236957	0.215159	0	0	1.93723	7.25002	CDC42;FERMT1;PARD3;FBF1;MYO18A;MSN;MYO9A;RHOA;CLASP1
RNA modification (GO:0009451)	21/54	0.0237361	0.215143	0	0	1.50674	5.63634	PUS3;TRUB1;NOP56;NOP58;SSB;NSUN2;WDR4;NOP2;PARN;NSUN6;CDKAL1;THUMPD1;TFB1M;PUS7;LRPPRC;THG1L;FTSJ3;TARBP1;ADAT2;TRMT6;AARS
post-translational protein modification (GO:0043687)	109/357	0.0243727	0.220521	0	0	1.18296	4.39386	CSF1;DSCC1;CCNF;DMP1;FBXO22;PSMD9;PSMD6;NUB1;PSMD7;LGALS1;PSMD5;PSMD2;PSMD1;SKP2;WSB1;ESCO1;FBXW7;FBXO2;ADAM10;LMO7;ESCO2;FBXO11;PDIA6;RBX1;PSME4;PSME1;PSME2;PSMD10;PSMD12;PSMD11;CUL5;PSMD14;SDC2;CUL3;CUL2;DCUN1D1;CUL1;KLHL11;HIF1A;LTBP1;HSP90B1;NAE1;SOCS6;ATG5;RHBDD1;FUCA2;TMEM132A;KLHL22;CP;FBXO30;KLHL20;COPS4;COPS3;COPS5;COPS2;CALU;UBA3;STT3A;RAB5A;PRKCSH;CHM;MIA3;MSLN;CYR61;SENP8;WDR5;UBXN7;C…
negative regulation of mitotic cell cycle (GO:0045930)	19/48	0.0252477	0.228034	0	0	1.53364	5.64231	BTG4;BTG3;CDT1;FOXC1;FZD3;BTG1;CDKN1B;PNPT1;SMAD3;GADD45A;CDC14B;TOM1L1;DLG1;NME6;CHEK1;CTNNB1;HECA;MAD2L1;MCPH1
establishment of endothelial barrier (GO:0061028)	10/21	0.0255803	0.23063	0	0	1.84498	6.76359	TJP1;RAP2C;RAP1B;RAP1A;MARVELD2;RDX;MSN;F11R;EZR;TJP2
intracellular protein transport (GO:0006886)	106/347	0.0257401	0.231661	0	0	1.18355	4.33146	USP6NL;VPS29;IPO11;NUP107;ZFYVE9;CSE1L;PHB2;IPO7;IPO5;IPO8;CHORDC1;LAMP2;ARFIP1;VPS35;AP1S3;VPS36;WLS;PDIA3;STX8;STX7;NUP93;ZFYVE16;RAB31;CTAGE5;CDC37;RABL3;NUP98;KPNB1;COPB2;POM121;COPA;FUT10;VPS26A;SNX1;NUP85;MYO6;NUP88;SNX9;TBC1D12;RAB6B;EVI5;TBC1D15;SNX6;TBC1D8B;RABGAP1L;NUP155;NUP153;SNF8;APPBP2;CALR;RAB5A;CEP57;NXT1;CLTC;AP4E1;SNX13;NXT2;RAB22A;XPO1;XPO4;XPO5;TLK1;TMED7;CCHCR1;TNPO1;TMED5;T…
protein complex subunit organization (GO:0071822)	18/45	0.0259412	0.23306	0	0	1.54979	5.6597	CDT1;NUP205;TGFB2;SEH1L;NUP133;ST13;SCX;LOXL4;TGFBR1;NDC80;COL2A1;CENPH;TPR;NUF2;NUP35;NUP54;NUP98;DDR2
plasma membrane bounded cell projection assembly (GO:0120031)	76/241	0.0262062	0.235027	0	0	1.22182	4.44959	CYFIP1;TTC26;TRAF3IP1;CEP164;CBY1;SNX10;PTPN23;FNBP1L;PTPDC1;CDC14B;SEPT8;SEPT7;WDR5;NEK1;BBS7;IFT57;CC2D2A;BBS5;CEP290;SNAP29;BBS4;DYNC2H1;OFD1;ACTR3;IQCB1;ABCC4;ACTR2;EMP1;KIF24;IFT80;OCRL;DYNLL1;RHOD;WDR35;KIF27;SEPT2;CD2AP;IFT88;IFT81;TRIM59;EZR;IFT46;RAPGEF6;SSX2IP;INTU;ARL6;ARL3;FBF1;ASAP1;FGD1;TTBK2;FGD3;FGD4;SDCBP;IFT74;FGD6;ARL13B;KIF3A;RAB23;TCTEX1D2;PIP5K1A;SRGAP2;ATP6V1D;SEPT10;SEPT11…
regulation of chromosome organization (GO:0033044)	11/24	0.0267823	0.239772	0	0	1.7758	6.42841	CDT1;SETD5;PIF1;XRCC5;MYC;SETD1A;HNRNPD;LIG4;HNRNPU;MKI67;TERF2
intrinsic apoptotic signaling pathway in response to endoplasmic reticulum stress (GO:0070059)	11/24	0.0267823	0.239352	0	0	1.7758	6.42841	PPP1R15A;AIFM1;DDIT3;DNAJC10;BCL2;TNFRSF10B;TRIB3;CHAC1;TANK;ATF4;MAP3K5
positive regulation of microtubule polymerization or depolymerization (GO:0031112)	11/24	0.0267823	0.238934	0	0	1.7758	6.42841	CLIP1;PAK1;NAV3;TRPV4;AKAP9;RPS3;SLAIN2;MAPRE1;MET;CLASP1;CDK5RAP2
positive regulation of microtubule polymerization (GO:0031116)	11/24	0.0267823	0.238517	0	0	1.7758	6.42841	MECP2;CLIP1;PAK1;NAV3;AKAP9;RPS3;SLAIN2;MAPRE1;MET;CLASP1;CDK5RAP2
signal transduction by p53 class mediator (GO:0072331)	16/39	0.0271004	0.240929	0	0	1.58953	5.73534	DDX5;USP10;ATRX;TRIAP1;KRCC1;NDRG1;POU4F1;RRP8;HINT1;ZMAT1;MYBBP1A;ARTN;MYO6;JMY;E2F7;BOK
protein localization to organelle (GO:0033365)	34/97	0.0271452	0.240908	0	0	1.35806	4.89792	PPP1R15A;DDX3X;ARL6;DHX9;DDX1;RPL11;ARL1;GCC2;SNX10;YBX1;BICD1;FAM83H;SIX4;TTC21B;PACSIN2;CEP250;ATP6V1D;BBS4;TIA1;SSB;TMEM30A;COG3;RPA1;RPA2;CSNK1D;MARCH5;WDR35;TOPORS;RAB11A;DNAJA1;ACAP2;MDM2;CALR;OPTN
regulation of double-strand break repair via homologous recombination (GO:0010569)	12/27	0.0274649	0.243322	0	0	1.72199	6.19027	RAD51AP1;INSL6;RTEL1;SETD2;HELB;RAD51;KDM1A;PPP4R2;FIGNL1;CHEK1;RPA2;POLK
microtubule polymerization (GO:0046785)	12/27	0.0274649	0.2429	0	0	1.72199	6.19027	NDE1;TRPV4;CENPJ;AKAP9;TUBGCP5;RANBP9;SLAIN2;CSNK1D;TUBGCP3;TUBG1;CKAP5;CLASP1
telomere maintenance via telomere lengthening (GO:0010833)	12/27	0.0274649	0.24248	0	0	1.72199	6.19027	DCLRE1B;HSP90AA1;RAD50;HSP90AB1;RAD51;RFC1;DKC1;PTGES3;PINX1;GAR1;NHP2;TERF1
axonal transport (GO:0098930)	15/36	0.0275066	0.242428	0	0	1.61436	5.80093	DST;FMR1;AP3B1;HIF1A;TERF2;FXR1;AP3M1;SPAST;KIF3B;OPA1;KIF3A;BLOC1S2;AP3S1;HAP1;PAFAH1B1
multivesicular body assembly (GO:0036258)	13/30	0.0277532	0.244181	0	0	1.67894	6.01798	TSG101;VPS4B;VPS37A;STAM;SNF8;RAB11A;CHMP1B;CHMP2B;CHMP4C;CHMP2A;VPS36;STAM2;CHMP5
hippo signaling (GO:0035329)	13/30	0.0277532	0.24376	0	0	1.67894	6.01798	YAP1;YWHAE;TEAD4;YWHAB;WWC1;STK3;TJP1;LATS1;CASP3;DVL2;AMOTL2;TEAD1;TJP2
ubiquitin-dependent ERAD pathway (GO:0030433)	22/58	0.0281782	0.247068	0	0	1.46963	5.2454	VCP;HSPA5;FAF2;ERLIN1;UBE4A;DERL2;UBE4B;ERLIN2;MARCH6;HSP90B1;UBE2J1;PSMC5;PSMC6;PSMC3;PSMC1;PSMC2;DNAJC10;UBXN8;DNAJB9;MAN1B1;UBXN4;DZIP3
negative regulation of canonical Wnt signaling pathway (GO:0090090)	49/148	0.0282865	0.247592	0	0	1.28276	4.57352	INVS;GSK3B;CTNND1;GLI3;PSMD9;PSMD6;PSMD7;PSMD5;RUVBL2;PSMD2;PSMD1;SCYL2;AXIN1;RBX1;LATS1;PSMA5;PSMA6;PSMA3;PSMA4;PSMA1;SDHAF2;PSMA2;DDIT3;PSME4;PSME1;PSME2;PSMD10;PSMD12;PSMD11;PSMD14;HDAC1;CUL3;KLHL12;MLLT3;PSMA7;STK3;ZNRF3;PSMB1;DVL2;RPS27A;CSNK1A1;FZD6;CYLD;PSMC5;PSMC6;APC;PSMC3;PSMC1;PSMC2
regulation of cell aging (GO:0090342)	7/13	0.0287555	0.251266	0	0	2.08625	7.40395	RSL1D1;ING2;NUAK1;PNPT1;NEK4;FOXM1;MARCH5
regulation of macrophage differentiation (GO:0045649)	7/13	0.0287555	0.250836	0	0	2.08625	7.40395	CASP8;CSF1;LIF;PRKCA;RIPK1;INHBA;PTPN2
mRNA modification (GO:0016556)	7/13	0.0287555	0.250408	0	0	2.08625	7.40395	PUS3;TRUB1;METTL14;WTAP;DKC1;PUS1;TRMT6
protein neddylation (GO:0045116)	7/13	0.0287555	0.249982	0	0	2.08625	7.40395	DCUN1D5;DCUN1D4;DCUN1D1;UBA3;RNF7;NAE1;RBX1
chromatin assembly or disassembly (GO:0006333)	7/13	0.0287555	0.249557	0	0	2.08625	7.40395	SUV39H2;SUPT16H;CHAF1B;CHAF1A;HIRIP3;RBBP4;MTA2
positive regulation of binding (GO:0051099)	29/81	0.0296001	0.25645	0	0	1.38715	4.88276	GSK3B;CSF3;FOXC1;DHX9;USP33;GMNN;RPL11;CEBPG;HMGB2;NMD3;HMGB1;PSEN1;STK3;STMN1;DPH3;CDT1;NCBP1;KDM4D;AKTIP;DDX11;PLAUR;PARP9;NME1;FKBP1A;TIAM1;TRIB3;MET;RAN;TAF1
regulation of protein ubiquitination (GO:0031396)	35/101	0.0299649	0.259171	0	0	1.34264	4.70961	PSMD10;UBXN1;HSP90AB1;CUL3;PHF23;PINX1;TNFAIP3;XIAP;PARK7;BCL10;BRCA1;BAG5;RNF139;CHORDC1;RPS3;CDK5RAP3;N4BP1;FANCI;ZYG11B;HSP90AA1;FBXW7;FEM1B;SPHK1;AXIN1;ISG15;COMMD1;SENP2;GTPBP4;TGFBR1;LATS1;FKBP1A;DNAJA1;GNL3L;UBE2N;SPOPL
positive regulation of mitotic cell cycle (GO:0045931)	20/52	0.0304022	0.262508	0	0	1.49018	5.20556	GEN1;EDN1;SPHK1;USP22;TGFA;ASNS;PRKCA;NDC80;AURKA;IL1A;DYNC1LI1;CCNB1;RPS6KB1;TPR;NUSAP1;MDM2;PHIP;PKN2;EIF4E;MAD2L1
positive regulation of cellular biosynthetic process (GO:0031328)	52/159	0.0306797	0.264457	0	0	1.26712	4.41484	RPL5;CSF2;LPGAT1;DDX3X;HSP90AB1;FMR1;EIF4A3;PARK7;PKD2;ELAVL1;IGF1R;RPS4X;RBM3;MYC;EDN1;HSP90AA1;PRMT1;LARP4B;PASK;DBF4;DDAH1;RPL26;DNA2;TLR4;PCNA;DHX9;TYRP1;FAM129A;RPS27L;NMD3;PTGS2;ARPP19;HIF1A;THBS1;FXR1;PDGFC;YTHDF1;NPM1;SMAD3;NPM2;YTHDF3;UPF3B;UPF3A;LARP4;KITLG;RPS6KB1;HNRNPD;EIF3E;CALR;EIF3C;EIF3D;PTPN2
positive regulation of macrophage differentiation (GO:0045651)	5/8	0.0311921	0.268421	0	0	2.42154	8.39691	CASP8;CSF1;LIF;PRKCA;RIPK1
translocation of molecules into host (GO:0044417)	5/8	0.0311921	0.267969	0	0	2.42154	8.39691	THOC1;THOC3;THOC2;THOC5;THOC7
positive regulation of mitotic metaphase/anaphase transition (GO:0045842)	5/8	0.0311921	0.267518	0	0	2.42154	8.39691	CDT1;ESPL1;CUL3;NSMCE2;DLGAP5
protein K6-linked ubiquitination (GO:0085020)	5/8	0.0311921	0.26707	0	0	2.42154	8.39691	BARD1;UBE2S;UBE2T;RNF6;BRCA1
response to hydroxyurea (GO:0072710)	5/8	0.0311921	0.266622	0	0	2.42154	8.39691	BLM;FMR1;DDX11;ATRX;TIMELESS
negative regulation of centriole replication (GO:0046600)	5/8	0.0311921	0.266176	0	0	2.42154	8.39691	CHMP2A;TRIM37;BRCA1;CDK5RAP2;MDM1
ventricular trabecula myocardium morphogenesis (GO:0003222)	5/8	0.0311921	0.265732	0	0	2.42154	8.39691	TGFB2;NRG1;RBPJ;TGFBR1;BMPR1A
rRNA pseudouridine synthesis (GO:0031118)	5/8	0.0311921	0.265289	0	0	2.42154	8.39691	MRPL1;DKC1;GAR1;NHP2;NAF1
U4 snRNA 3'-end processing (GO:0034475)	5/8	0.0311921	0.264848	0	0	2.42154	8.39691	EXOSC7;EXOSC9;EXOSC8;EXOSC3;EXOSC2
peptidyl-lysine monomethylation (GO:0018026)	5/8	0.0311921	0.264408	0	0	2.42154	8.39691	SETD2;SETD3;SETD6;SETD7;SMYD2
viral mRNA export from host cell nucleus (GO:0046784)	5/8	0.0311921	0.263969	0	0	2.42154	8.39691	THOC1;THOC3;THOC2;THOC5;THOC7
telomeric D-loop disassembly (GO:0061820)	5/8	0.0311921	0.263532	0	0	2.42154	8.39691	RECQL4;BLM;WRN;TERF1;TERF2
microtubule nucleation by microtubule organizing center (GO:0051418)	5/8	0.0311921	0.263097	0	0	2.42154	8.39691	NIN;TUBGCP5;TUBGCP3;CEP192;MZT1
regulation of amyloid precursor protein catabolic process (GO:1902991)	5/8	0.0311921	0.262662	0	0	2.42154	8.39691	FKBP1A;PRNP;ROCK1;ROCK2;PICALM
positive regulation of chromatin binding (GO:0035563)	5/8	0.0311921	0.26223	0	0	2.42154	8.39691	CDT1;KDM4D;DDX11;GMNN;PARP9
positive regulation of RNA polymerase II transcriptional preinitiation complex assembly (GO:0045899)	5/8	0.0311921	0.261798	0	0	2.42154	8.39691	PSMC5;PSMC6;PSMC3;PSMC1;PSMC2
regulation of endodeoxyribonuclease activity (GO:0032071)	5/8	0.0311921	0.261369	0	0	2.42154	8.39691	NPM1;DDX11;RPS3;HMGB1;SIRT1
negative regulation of DNA replication (GO:0008156)	8/16	0.0325366	0.272187	0	0	1.93723	6.63578	GMNN;RAD17;CDC6;TERF1;PDS5A;GTPBP4;S100A11;ATR
rRNA transcription (GO:0009303)	8/16	0.0325366	0.271742	0	0	1.93723	6.63578	GTF3C2;GTF3C3;GTF3C4;TAF1B;GTF3C6;MARS;SPIN1;CD3EAP
regulation of protein homodimerization activity (GO:0043496)	8/16	0.0325366	0.271298	0	0	1.93723	6.63578	GNL3L;HSPA5;BCL2;NRG1;PARK7;AIDA;TANK;TIRAP
programmed necrotic cell death (GO:0097300)	8/16	0.0325366	0.270855	0	0	1.93723	6.63578	CYLD;MLKL;PGAM5;RIPK1;TRPM7;DNM1L;TLR4;TLR3
positive regulation of DNA-templated transcription, initiation (GO:2000144)	8/16	0.0325366	0.270414	0	0	1.93723	6.63578	FOSL1;SETX;BCLAF1;GTF2B;SUB1;CTNNB1;GTF2F2;TAF1
regulation of type I interferon production (GO:0032479)	30/85	0.03311	0.274732	0	0	1.36746	4.66019	CRCP;TRAF3IP1;DHX9;PRKDC;TNFAIP3;TBK1;DHX36;PCBP2;TRIM25;POLR2F;LRRFIP1;POLR2H;RPS27A;POLR2K;XRCC6;XRCC5;ISG15;TIRAP;CYLD;ITCH;POLR3A;POLR3B;POLR3D;POLR1C;TAX1BP1;POLR3F;POLR3G;CTNNB1;POLR3K;TRIM56
negative regulation of programmed cell death (GO:0043069)	122/408	0.0335018	0.277532	0	0	1.15854	3.93459	ANKLE2;ARL6IP1;SCX;PARK7;TM7SF3;PHB2;IGF1R;RPS6KA3;HMGN5;MYC;BNIP3L;PRKCI;EPHA8;OSR1;TYRO3;YME1L1;PHIP;EPHA1;SQSTM1;EPHA2;PSMD10;PRKDC;GLO1;PSEN1;MTDH;HSP90B1;PRDX2;PDCD10;FIGNL1;BARD1;HSPA9;STIL;TSLP;HSPA5;API5;PLK2;RHBDD1;PLK1;ASNS;HMGA2;PA2G4;PTK2;KLHL20;SETX;AHI1;HNRNPK;COPS5;GDNF;IL7;BCL2;CDK1;GSK3B;DDX3X;CITED2;FHL2;KIF14;TRIAP1;AATF;SH3RF1;MECOM;OPA1;SIX4;CASP3;MYO18A;HTATIP2;USP47;ANXA1;A…
positive regulation of mitotic nuclear division (GO:0045840)	16/40	0.0346172	0.286307	0	0	1.54979	5.21256	RANBP2;BECN1;RANBP1;EDN1;UBE2C;CDCA5;NSMCE2;HNRNPU;TGFA;SMC5;PHB2;AURKA;IL1A;NIPBL;NUSAP1;PHIP
protein targeting to lysosome (GO:0006622)	9/19	0.034915	0.288303	0	0	1.83527	6.15705	HSPA8;AP3M1;ZFYVE16;SNX16;LARS;NEDD4;NCOA4;LAMP2;GCC2
negative regulation of proteolysis involved in cellular protein catabolic process (GO:1903051)	9/19	0.034915	0.287837	0	0	1.83527	6.15705	EFNA1;RPL5;GABARAPL2;PDCL3;RPS7;TRIM39;RPL23;RPL11;TAF1
folic acid metabolic process (GO:0046655)	9/19	0.034915	0.287373	0	0	1.83527	6.15705	DHFR;MTRR;MTHFD1L;MTHFD1;SHMT2;MTHFD2;SHMT1;SLC25A32;ALDH1L2
histone deubiquitination (GO:0016578)	9/19	0.034915	0.28691	0	0	1.83527	6.15705	USP36;ENY2;USP15;USP7;USP16;USP22;UIMC1;BRCC3;SUPT3H
protein K63-linked ubiquitination (GO:0070534)	15/37	0.0354983	0.291234	0	0	1.57073	5.24352	UBE2B;RNF8;ZFP91;UBE2G1;TANK;RNF168;RNF115;ITCH;HECTD1;UBE2S;UBE2T;NEDD4;UBE2V2;UBE2N;TRIM56
positive regulation of protein transport (GO:0051222)	21/56	0.0357644	0.292946	0	0	1.45293	4.83941	UNC13B;TGFB2;GOLPH3L;ACSL3;IL1A;PDCD10;CHORDC1;TPR;ANKRD1;MYO18A;ADAM9;DNM1L;KIF20B;EZR;CEP290;PPIA;MYH10;ARHGEF5;PPID;EXOC1;EXPH5
positive regulation of cytokinesis (GO:0032467)	14/34	0.0362382	0.296351	0	0	1.59537	5.29286	CUL3;KIF14;KIF23;CDC6;AURKB;RHOA;CIT;CDC42;SPAST;RACGAP1;CSPP1;PKN2;ECT2;KIF20B
positive regulation of RNA splicing (GO:0033120)	10/22	0.0362847	0.296258	0	0	1.76112	5.84051	SETX;SNW1;NCBP1;POLR2A;THRAP3;TRA2B;CELF4;NUP98;PRDX6;RBM22
ncRNA catabolic process (GO:0034661)	10/22	0.0362847	0.295784	0	0	1.76112	5.84051	EXOSC7;ZCCHC11;EXOSC10;XRN1;DIS3;POP1;EXOSC9;EXOSC8;EXOSC3;EXOSC2
nucleosome organization (GO:0034728)	28/79	0.036575	0.297675	0	0	1.37323	4.54318	SETD2;SET;HMGB2;RNF8;RSF1;CTCF;SPTY2D1;SUPT6H;CENPA;CHAF1B;CHAF1A;SART3;SMARCE1;BRD2;SUPT16H;SMARCC1;PBRM1;NPM1;ATRX;H3F3A;HMGA1;SMARCA5;NASP;GRWD1;ANP32E;PADI4;ANP32B;ASF1A
negative regulation of cellular protein metabolic process (GO:0032269)	31/89	0.0367093	0.298292	0	0	1.34953	4.45984	TRIM71;CSTB;DDX3X;FMR1;SHMT1;EIF4A3;EPRS;TYMS;GIGYF2;FXR1;SYNCRIP;LARP1;RNF139;RPS3;IGF2BP1;IGF2BP2;CDK5RAP3;EDN1;RPL13A;EIF2AK2;MEX3C;DHFR;ILF3;MEX3A;CNOT7;CNOT1;NCL;CNOT2;CAPRIN1;CALR;EIF4E2
multivesicular body organization (GO:0036257)	13/31	0.0367792	0.298385	0	0	1.62478	5.36635	TSG101;VPS4B;VPS37A;STAM;SNF8;RAB11A;CHMP1B;CHMP2B;CHMP4C;CHMP2A;VPS36;STAM2;CHMP5
vesicle-mediated transport to the plasma membrane (GO:0098876)	13/31	0.0367792	0.297912	0	0	1.62478	5.36635	VPS29;ANKRD27;VPS26A;COMMD1;RAB10;SNX27;EXOC4;VPS35;GOPC;EXOC5;ANKRD50;STEAP2;EXOC1
protein depolymerization (GO:0051261)	11/25	0.0369274	0.298638	0	0	1.70477	5.62368	KIF18A;KIF18B;KIF2A;VPS4B;CFL2;STMN1;TWF1;DSTN;KIF24;KIF2C;CKAP5
signal transduction in response to DNA damage (GO:0042770)	11/25	0.0369274	0.298166	0	0	1.70477	5.62368	USP10;GADD45A;ARTN;CHEK2;MYO6;ATRX;CDC5L;TRIAP1;BID;NDRG1;E2F7
regulation of cell morphogenesis (GO:0022604)	12/28	0.0370441	0.298635	0	0	1.66049	5.47238	ZMYM1;ZMYM2;FMNL2;ZMYM4;ZMYM6;PHIP;EFNA5;LARP4;PDZD8;CAMSAP1;CD44;SH3D19
negative regulation of fatty acid biosynthetic process (GO:0045717)	6/11	0.0397734	0.320132	0	0	2.11335	6.8146	ERLIN1;TRIB3;ERLIN2;BRCA1;PIBF1;SIRT1
activation of cysteine-type endopeptidase activity involved in apoptotic signaling pathway (GO:0097296)	6/11	0.0397734	0.319628	0	0	2.11335	6.8146	CASP8;FAS;TNFRSF10B;RIPK1;JAK2;TANK
positive regulation of transcription from RNA polymerase II promoter in response to endoplasmic reticulum stress (GO:1990440)	6/11	0.0397734	0.319125	0	0	2.11335	6.8146	HSPA5;DDIT3;ATF6;ATF3;MBTPS2;ATF4
purine nucleobase metabolic process (GO:0006144)	6/11	0.0397734	0.318624	0	0	2.11335	6.8146	PRPS1;MTHFD1;MTHFD1L;SHMT1;GMPS;PAICS
negative regulation of cellular senescence (GO:2000773)	6/11	0.0397734	0.318125	0	0	2.11335	6.8146	RBL1;CDK6;AKT3;HMGA2;TERF2;SIRT1
regulation of chromatin binding (GO:0035561)	6/11	0.0397734	0.317627	0	0	2.11335	6.8146	CDT1;BTAF1;KDM4D;DDX11;GMNN;PARP9
macrophage differentiation (GO:0030225)	6/11	0.0397734	0.317131	0	0	2.11335	6.8146	CDC42;CSF3;CASP8;CSF1;PARP1;SIRT1
regulation of RNA polymerase II transcriptional preinitiation complex assembly (GO:0045898)	6/11	0.0397734	0.316636	0	0	2.11335	6.8146	PSMC5;PSMC6;PSMC3;PSMC1;PSMC2;HMGB1
negative regulation of intrinsic apoptotic signaling pathway in response to DNA damage by p53 class mediator (GO:1902166)	6/11	0.0397734	0.316143	0	0	2.11335	6.8146	ING2;KDM1A;TAF9;TRIAP1;SIRT1;CD44
aspartate family amino acid biosynthetic process (GO:0009067)	6/11	0.0397734	0.315651	0	0	2.11335	6.8146	MTRR;MTHFD1;ASNSD1;ASNS;PLOD2;MTR
microtubule anchoring at microtubule organizing center (GO:0072393)	6/11	0.0397734	0.315161	0	0	2.11335	6.8146	NIN;CCDC68;KIF3A;HOOK3;BICD1;BBS4
Golgi ribbon formation (GO:0090161)	6/11	0.0397734	0.314672	0	0	2.11335	6.8146	PRMT5;MYO18A;GCC2;VAMP4;OPTN;TMED5
chromatin silencing at rDNA (GO:0000183)	6/11	0.0397734	0.314185	0	0	2.11335	6.8146	SUV39H1;H3F3A;MBD2;BEND3;SIRT1;RRP8
non-canonical Wnt signaling pathway (GO:0035567)	42/127	0.0405449	0.319784	0	0	1.28132	4.10707	PSMD10;PSMD12;PSMD11;PSMD14;CLTC;PSMA7;CDC42;PSMD9;PPP3CA;PSMD6;PPP3CB;PSMD7;GNAT2;PSMD5;PSMD2;PSMB1;DVL2;PSMD1;RPS27A;FZD3;SMURF2;RYK;FZD6;AP2B1;RHOA;PSMA5;TIAM1;PSMA6;PSMA3;PSMC5;PSMA4;PSMC6;DAAM1;PSMA1;PSMC3;PSMA2;PSMC1;PSME4;PSMC2;PSME1;PSME2;CTNNB1
macroautophagy (GO:0016236)	37/110	0.040913	0.32219	0	0	1.30323	4.16552	BECN1;VCP;PRKAA1;TSG101;STX17;EI24;VPS4B;TMEM74;TOMM20;TOMM22;FUNDC1;RB1CC1;LAMP2;MFN1;RPS27A;VPS36;SNAP29;ATG5;GABARAPL2;CSNK2A1;CSNK2A2;VPS37A;STAM;SNF8;DYNLL1;SNX14;CHMP2B;NBR1;CHMP4C;CHMP2A;TOMM7;PLAA;PIK3C3;PGAM5;STAM2;SQSTM1;TOMM5
nucleosome assembly (GO:0006334)	22/60	0.0412806	0.324584	0	0	1.42064	4.52809	BRD2;NPM1;ATRX;H3F3A;HMGB2;SMARCA5;RSF1;SPTY2D1;CENPA;HIRA;CHAF1B;CHAF1A;SART3;RBBP4;NASP;GRWD1;HAT1;ANP32E;PADI4;ANP32B;ASF1A;ASF1B
regulation of protein localization to early endosome (GO:1902965)	4/6	0.0420077	0.329793	0	0	2.58298	8.18779	ROCK2;RDX;MSN;EZR
regulation of oxidative stress-induced neuron intrinsic apoptotic signaling pathway (GO:1903376)	4/6	0.0420077	0.329286	0	0	2.58298	8.18779	FBXW7;NONO;PARK7;HIF1A
histone-serine phosphorylation (GO:0035404)	4/6	0.0420077	0.328781	0	0	2.58298	8.18779	RPS6KA5;HMGA2;VRK1;AURKB
tRNA transcription from RNA polymerase III promoter (GO:0042797)	4/6	0.0420077	0.328278	0	0	2.58298	8.18779	GTF3C2;GTF3C3;GTF3C4;GTF3C6
regulation of nuclear cell cycle DNA replication (GO:0033262)	4/6	0.0420077	0.327776	0	0	2.58298	8.18779	TIPIN;ATRX;WIZ;CDC7
mRNA 3'-splice site recognition (GO:0000389)	4/6	0.0420077	0.327275	0	0	2.58298	8.18779	ISY1;SF3A3;SF3A1;SLU7
establishment of endothelial intestinal barrier (GO:0090557)	4/6	0.0420077	0.326776	0	0	2.58298	8.18779	TJP1;RAP2C;F11R;TJP2
negative regulation of cytokinesis (GO:0032466)	4/6	0.0420077	0.326279	0	0	2.58298	8.18779	CHMP4C;E2F7;AURKB;E2F8
centromeric sister chromatid cohesion (GO:0070601)	4/6	0.0420077	0.325783	0	0	2.58298	8.18779	NAA50;SGO1;BUB1B;BUB1
embryonic skeletal joint morphogenesis (GO:0060272)	4/6	0.0420077	0.325289	0	0	2.58298	8.18779	COL2A1;OSR1;AXIN1;CTNNB1
mRNA 5'-splice site recognition (GO:0000395)	4/6	0.0420077	0.324796	0	0	2.58298	8.18779	PRPF39;SRSF1;PSIP1;SRSF12
positive regulation of helicase activity (GO:0051096)	4/6	0.0420077	0.324305	0	0	2.58298	8.18779	MSH6;MSH2;MSH3;SSBP1
positive regulation of protein localization to endosome (GO:1905668)	4/6	0.0420077	0.323815	0	0	2.58298	8.18779	ROCK2;RDX;MSN;EZR
regulation of extracellular exosome assembly (GO:1903551)	4/6	0.0420077	0.323326	0	0	2.58298	8.18779	SDCBP;TSG101;SDC4;STAM
single strand break repair (GO:0000012)	4/6	0.0420077	0.322839	0	0	2.58298	8.18779	TDP1;APLF;LIG4;SIRT1
regulation of t-circle formation (GO:1904429)	4/6	0.0420077	0.322354	0	0	2.58298	8.18779	RTEL1;XRCC5;ERCC1;TERF2
positive regulation of protein localization to centrosome (GO:1904781)	4/6	0.0420077	0.32187	0	0	2.58298	8.18779	GSK3B;APC;CEP250;BICD1
dendritic spine maintenance (GO:0097062)	4/6	0.0420077	0.321387	0	0	2.58298	8.18779	PRNP;MTMR2;PICK1;IGF1R
protein localization to nuclear envelope (GO:0090435)	4/6	0.0420077	0.320906	0	0	2.58298	8.18779	NUP155;PLK1;TOR1AIP2;NUP54
positive regulation of protein localization to early endosome (GO:1902966)	4/6	0.0420077	0.320426	0	0	2.58298	8.18779	ROCK2;RDX;MSN;EZR
5S class rRNA transcription from RNA polymerase III type 1 promoter (GO:0042791)	4/6	0.0420077	0.319948	0	0	2.58298	8.18779	GTF3C2;GTF3C3;GTF3C4;GTF3C6
regulation of hydrolase activity (GO:0051336)	28/80	0.0427983	0.325484	0	0	1.35606	4.27331	CAMK2D;ARHGAP8;RABGAP1;EFNA5;FGD1;SYDE2;FGD3;FGD4;WRN;FGD6;RACGAP1;TDG;CDK5RAP3;TBC1D15;VAV3;TNNC1;ATPIF1;RDX;OCRL;PTK2;VMA21;PLXNB1;EPHA1;RAPGEF6;CRK;ARHGEF5;RAB3GAP1;PAFAH1B1
establishment or maintenance of actin cytoskeleton polarity (GO:0030950)	7/14	0.0449379	0.341247	0	0	1.93723	6.01022	MAPKAP1;RICTOR;RHOC;RHOD;RND3;RHOA;RND1
negative regulation of intrinsic apoptotic signaling pathway by p53 class mediator (GO:1902254)	7/14	0.0449379	0.34074	0	0	1.93723	6.01022	ING2;KDM1A;TAF9;MDM2;TRIAP1;SIRT1;CD44
positive regulation of DNA damage response, signal transduction by p53 class mediator (GO:0043517)	7/14	0.0449379	0.340234	0	0	1.93723	6.01022	DDX5;SPRED1;ANKRD1;ATM;RPL26;EEF1E1;ATR
pore complex assembly (GO:0046931)	7/14	0.0449379	0.33973	0	0	1.93723	6.01022	NUP93;NUP205;AHCTF1;NUP107;NUP153;NUP98;RTN4
regulation of cellular amide metabolic process (GO:0034248)	15/38	0.0450398	0.339997	0	0	1.52939	4.74144	MTPN;CYFIP1;DDX6;CDC123;SAMD8;ROCK1;RPL10;NOLC1;RBM3;EEF1A1;TCOF1;GEMIN5;EIF4E;METAP1;EIF2A
DNA damage checkpoint (GO:0000077)	15/38	0.0450398	0.339495	0	0	1.52939	4.74144	HUS1;CDC5L;CDC14B;STK3;BRIP1;ARTN;CHEK2;TAOK1;CHEK1;TIPRL;E2F1;RBBP8;RAD17;CLSPN;ATR
ERAD pathway (GO:0036503)	27/77	0.0450554	0.339111	0	0	1.35858	4.21141	VCP;FAF2;DERL2;HSP90B1;UBE2J1;ATXN3;RNF139;UBXN8;TRIM25;DNAJB9;UBXN4;UGGT1;HSPA5;RHBDD1;ERLIN1;UBE4A;UBE4B;ERLIN2;MARCH6;PSMC5;PSMC6;PSMC3;PSMC1;PSMC2;DNAJC10;MAN1B1;DZIP3
positive regulation of RNA metabolic process (GO:0051254)	14/35	0.0464461	0.349064	0	0	1.54979	4.75701	UTP15;DDX5;PNPT1;DIMT1;HEATR1;WDR75;NMD3;WDR43;SUPV3L1;SETX;POLR2A;RIOK2;RIOK1;RBM22
positive regulation of peptide secretion (GO:0002793)	14/35	0.0464461	0.348551	0	0	1.54979	4.75701	UNC13B;TGFB2;GOLPH3L;IL1A;MYO18A;ANKRD1;ADAM9;DNM1L;EZR;MYH10;PPIA;PPID;EXPH5;EXOC1
positive regulation of ATPase activity (GO:0032781)	14/35	0.0464461	0.348039	0	0	1.54979	4.75701	DYNC1I2;GABARAPL2;DHX9;UHRF1;HNRNPU;TOR1AIP2;DNAJC24;DYNLL1;PLSCR1;TNNT2;DNAJC10;DNAJB11;RGN;DNAJC9
negative regulation of phosphoprotein phosphatase activity (GO:0032515)	8/17	0.0478608	0.358114	0	0	1.82328	5.54178	PPP1R15A;FKBP1A;GSK3B;ROCK1;PPP1R11;ROCK2;TIPRL;MASTL
rRNA catabolic process (GO:0016075)	8/17	0.0478608	0.35759	0	0	1.82328	5.54178	EXOSC7;EXOSC10;XRN1;DIS3;EXOSC9;EXOSC8;EXOSC3;EXOSC2
chaperone-mediated protein complex assembly (GO:0051131)	8/17	0.0478608	0.357067	0	0	1.82328	5.54178	CCT2;HSP90AA1;HSP90AB1;HSPA4;BBS12;PTGES3;LONP1;HSPD1
positive regulation of telomere capping (GO:1904355)	8/17	0.0478608	0.356546	0	0	1.82328	5.54178	RTEL1;TNKS2;TNKS;NEK7;HNRNPD;MAPK1;NEK2;AURKB
protein alkylation (GO:0008213)	12/29	0.0487531	0.362664	0	0	1.60323	4.84333	EEF1A1;PCMT1;HSPA8;KIN;VCP;PRMT1;ETF1;FAM98B;SNRPD3;RPS2;FAM98A;GSPT1
positive regulation of histone modification (GO:0031058)	12/29	0.0487531	0.362136	0	0	1.60323	4.84333	ING2;NIPBL;RPS6KA5;SART3;TADA2A;KDM1A;FMR1;RUVBL2;AKAP8;UBE2N;BRCA1;BRD7
organelle disassembly (GO:1903008)	9/20	0.0492962	0.365637	0	0	1.74351	5.24781	MCTS1;DYRK3;RB1CC1;KIF5B;CDK1;MTIF2;VRK1;DENR;KLC1
regulation of microtubule-based process (GO:0032886)	11/26	0.0494757	0.366436	0	0	1.6392	4.92788	IGBP1;GSK3B;CYLD;APC;TRAF3IP1;TAOK1;MEMO1;EFNA5;BICD1;PHLDB2;CLASP1
folic acid-containing compound metabolic process (GO:0006760)	10/23	0.0497283	0.367773	0	0	1.68455	5.05564	DHFR;MTRR;MTHFD1L;MTHFD1;SHMT2;MTHFD2;SHMT1;ATPIF1;SLC25A32;ALDH1L2
histone modification (GO:0016570)	33/98	0.0505171	0.373066	0	0	1.30467	3.89501	USP36;ENY2;HDAC2;USP16;HDAC1;UHRF1;AURKB;RPS6KA5;RUVBL2;RUVBL1;MIER1;TBL1X;NAA50;PRMT7;UBE2B;EYA1;PRMT1;USP22;MSL3;UBE2A;BAZ1B;SIRT1;SUPT3H;CCNA2;MORF4L1;TBL1XR1;MORF4L2;BRMS1L;CDK2;UBE2N;PADI4;PADI1;EZH2
peptidyl-amino acid modification (GO:0018193)	5/9	0.0554684	0.40904	0	0	2.15248	6.22485	METAP1D;TTLL4;MDM2;METAP1;METAP2
negative regulation of histone methylation (GO:0031061)	5/9	0.0554684	0.408449	0	0	2.15248	6.22485	DNMT1;MTF2;BRCA1;BCOR;SUPT6H
nuclear-transcribed mRNA catabolic process, exonucleolytic, 3'-5' (GO:0034427)	5/9	0.0554684	0.407861	0	0	2.15248	6.22485	EXOSC7;EXOSC9;EXOSC8;EXOSC3;EXOSC2
production of siRNA involved in RNA interference (GO:0030422)	5/9	0.0554684	0.407274	0	0	2.15248	6.22485	TSNAX;DROSHA;DICER1;TSN;MRPL44
mitotic DNA replication checkpoint (GO:0033314)	5/9	0.0554684	0.406689	0	0	2.15248	6.22485	HUS1;RAD17;CLSPN;TOPBP1;NAE1
regulation of helicase activity (GO:0051095)	5/9	0.0554684	0.406105	0	0	2.15248	6.22485	MSH6;MSH2;MSH3;SSBP1;SIRT1
nuclear RNA surveillance (GO:0071027)	5/9	0.0554684	0.405523	0	0	2.15248	6.22485	EXOSC7;EXOSC10;XRN1;EXOSC9;EXOSC8
microtubule anchoring at centrosome (GO:0034454)	5/9	0.0554684	0.404943	0	0	2.15248	6.22485	NIN;CCDC68;KIF3A;HOOK3;BBS4
purine ribonucleoside monophosphate metabolic process (GO:0009167)	15/39	0.056252	0.410077	0	0	1.49018	4.28861	HSPA8;OLA1;GMPS;AK4;NT5C2;PFAS;PAICS;CLPX;ATIC;PPAT;FIGNL1;IMPDH2;NDUFS1;ADSS;GART
regulation of cell-matrix adhesion (GO:0001952)	19/52	0.0571436	0.415982	0	0	1.41567	4.05192	GSK3B;JAG1;CSF1;ROCK1;ROCK2;PLEKHA2;CASK;SEMA3E;PIK3CB;EFNA5;THBS1;RHOA;PTK2;SLK;CDK6;PLAU;RASA1;EPHA1;CLASP1
ephrin receptor signaling pathway (GO:0048013)	28/82	0.0575342	0.418229	0	0	1.32299	3.77763	ROCK1;ROCK2;SDC2;WASL;PSEN1;EFNA5;ACTG1;EFNB2;CDC42;SDCBP;PAK1;PAK3;ACTR3;VAV3;ACTR2;YES1;EPHA8;PTPN11;AP2B1;RHOA;PTK2;EFNA1;TIAM1;ARPC3;RASA1;EPHA1;CRK;EPHA2
macromolecular complex assembly (GO:0065003)	39/120	0.0600974	0.436241	0	0	1.2592	3.54061	YAP1;SF3B3;CAPG;IL1RAP;WASL;EPRS;TANK;PARD6B;KNTC1;KIFAP3;WASF1;KPNA3;TEAD1;MDN1;CARD10;DARS;ST13;FANCA;HMGA1;AXIN1;RANBP9;DNAJB14;CD2AP;OCLN;APC;PARD3;CAPZA1;CNKSR3;CAPZA2;MDM2;GEMIN5;FAS;PPIH;NDUFAF1;MNAT1;PPID;SKAP2;PICALM;MPHOSPH6
protein acetylation (GO:0006473)	13/33	0.0606864	0.43989	0	0	1.52631	4.27676	NAA50;NAA30;ESCO1;NAA20;DSCC1;GTF2B;ESCO2;SIRT1;ING5;HAT1;NAA35;NAA16;NAA15
cell-cell junction assembly (GO:0007043)	27/79	0.060718	0.439495	0	0	1.32419	3.70972	FBF1;F11R;GJC1;GJA1;PARD6B;MARVELD2;CDH1;MARVELD3;MICALL2;CTNNA1;CDH24;ECT2;PRKCI;PRKCA;RHOC;MPP5;GRHL2;RHOA;TJP1;OCLN;DLG1;APC;PARD3;CDH10;TRPV4;PKN2;STRN
UDP-N-acetylglucosamine metabolic process (GO:0006047)	6/12	0.0625334	0.451994	0	0	1.93723	5.37012	SLC35A3;GNPDA2;GFPT1;PGM3;GNPNAT1;UAP1
serine family amino acid biosynthetic process (GO:0009070)	6/12	0.0625334	0.451355	0	0	1.93723	5.37012	MTHFD1;PSAT1;CTH;PHGDH;SEPHS1;PSPH
tRNA 5'-leader removal (GO:0001682)	6/12	0.0625334	0.450717	0	0	1.93723	5.37012	SSB;POP1;RPP30;RPP40;RPP14;RPP38
cytoplasmic translational initiation (GO:0002183)	6/12	0.0625334	0.450082	0	0	1.93723	5.37012	MCTS1;EIF3M;DENR;EIF3D;EIF4B;EIF3A
positive regulation of DNA-dependent DNA replication (GO:2000105)	6/12	0.0625334	0.449448	0	0	1.93723	5.37012	CDT1;ATRX;WIZ;CDC7;E2F7;E2F8
PERK-mediated unfolded protein response (GO:0036499)	6/12	0.0625334	0.448816	0	0	1.93723	5.37012	HSPA5;DDIT3;ASNS;EIF2S1;ATF3;ATF4
histone H3-K9 demethylation (GO:0033169)	6/12	0.0625334	0.448185	0	0	1.93723	5.37012	KDM3A;KDM4C;KDM3B;KDM1A;KDM4D;JMJD1C
amino sugar biosynthetic process (GO:0046349)	6/12	0.0625334	0.447557	0	0	1.93723	5.37012	NANP;GNPDA2;GFPT1;PGM3;GNPNAT1;UAP1
Golgi localization (GO:0051645)	6/12	0.0625334	0.44693	0	0	1.93723	5.37012	CDC42;ARHGAP21;PDCD10;HOOK3;YWHAZ;ARCN1
positive regulation of establishment of protein localization to mitochondrion (GO:1903749)	36/110	0.0627333	0.447732	0	0	1.26801	3.51094	YWHAE;USP36;YWHAB;GLS2;UBE2D3;NKAP;HTRA2;WDR46;NPEPPS;CYB5R1;UBL5;BCL2L11;CASP8;YWHAQ;RUVBL1;E2F1;MICALL2;PLAGL2;BID;YWHAH;SH3GLB1;CDKL2;FBXW7;CSNK2A2;WDR75;NRG1;WBP11;DYNLL1;YWHAZ;TFDP1;TFDP2;NMT1;BCL2;TOMM7;RHOU;SAE1
negative regulation of stress-activated MAPK cascade (GO:0032873)	12/30	0.0627531	0.447247	0	0	1.54979	4.29066	IGBP1;ITCH;DLG1;MECOM;MYC;MARVELD3;DUSP19;AIDA;FOXM1;ZMYND11;EZR;FKTN
negative regulation of protein modification by small protein conjugation or removal (GO:1903321)	17/46	0.0629689	0.448159	0	0	1.43187	3.95928	RPL5;UBXN1;RPL11;PINX1;TNFAIP3;ISG15;PARK7;SENP2;GTPBP4;DNAJA1;BAG5;GNL3L;CHORDC1;RPS3;SPOPL;CTNNB1;N4BP1
proteolysis involved in cellular protein catabolic process (GO:0051603)	31/93	0.0641292	0.455782	0	0	1.29149	3.54753	VCP;VPS4B;OTUD7B;TNFAIP3;IDE;PSMA7;SCPEP1;ATXN3;CASP8;CTSL;PSMB1;LONP1;RPS27A;SOCS6;ATE1;RHBDD1;ISG15;MARCH6;CLPX;DDB1;PSMA5;PSMA6;UBE2W;PSMA3;PSMA4;PSMA1;PSMA2;CHMP4C;MDM2;YME1L1;CUL4B
apoptotic DNA fragmentation (GO:0006309)	7/15	0.0659527	0.46809	0	0	1.80808	4.91585	H1F0;CASP3;HMGB2;DICER1;HMGB1;KPNB1;KPNA1
regulation of cell-substrate junction assembly (GO:0090109)	7/15	0.0659527	0.46744	0	0	1.80808	4.91585	SLK;ROCK1;ROCK2;EFNA5;RHOA;PTK2;CLASP1
intra-S DNA damage checkpoint (GO:0031573)	7/15	0.0659527	0.466792	0	0	1.80808	4.91585	ATF2;MDC1;TIPIN;MSH2;EME1;CHEK2;HUS1
N-terminal protein amino acid acetylation (GO:0006474)	7/15	0.0659527	0.466145	0	0	1.80808	4.91585	NAA50;NAA30;NAA20;NAA25;NAA35;NAA16;NAA15
positive regulation of viral release from host cell (GO:1902188)	7/15	0.0659527	0.4655	0	0	1.80808	4.91585	DDB1;TSG101;VPS4B;CHMP2B;CHMP4C;CHMP2A;SMC3
microtubule depolymerization (GO:0007019)	7/15	0.0659527	0.464857	0	0	1.80808	4.91585	KIF18A;KIF18B;KIF2A;STMN1;KIF24;KIF2C;CKAP5
positive regulation of exosomal secretion (GO:1903543)	7/15	0.0659527	0.464216	0	0	1.80808	4.91585	SDCBP;TSG101;SDC4;VPS4B;CHMP2A;STAM;SNF8
positive regulation of cysteine-type endopeptidase activity involved in apoptotic signaling pathway (GO:2001269)	7/15	0.0659527	0.463577	0	0	1.80808	4.91585	CASP8;HTRA2;TNFRSF10B;FAS;RIPK1;JAK2;TANK
positive regulation of protein export from nucleus (GO:0046827)	7/15	0.0659527	0.462939	0	0	1.80808	4.91585	YWHAE;GSK3B;XPO4;TPR;ANP32B;GTSE1;RBM22
establishment of protein localization to endoplasmic reticulum (GO:0072599)	7/15	0.0659527	0.462303	0	0	1.80808	4.91585	RAB10;SPCS3;SPCS2;SEC61G;SRP68;SRP14;RAB3GAP1
positive regulation of protein import (GO:1904591)	7/15	0.0659527	0.461669	0	0	1.80808	4.91585	PDCD5;TPR;EFCAB7;ECT2;ARHGEF5;IPO5;RBM22
positive regulation of histone methylation (GO:0031062)	10/24	0.0661183	0.462194	0	0	1.61436	4.3851	INSL6;DNMT1;SNW1;CTR9;MTF2;CTNNB1;WDR61;BRCA1;SIRT1;PHF19
negative regulation of cyclin-dependent protein serine/threonine kinase activity (GO:0045736)	10/24	0.0661183	0.461562	0	0	1.61436	4.3851	LATS1;CDKN1B;CDK6;APC;CDK4;PLK1;PTEN;CDK5RAP1;IPO7;IPO5
cytoplasmic pattern recognition receptor signaling pathway (GO:0002753)	10/24	0.0661183	0.460931	0	0	1.61436	4.3851	CYLD;ITCH;CASP8;CHUK;UBE2N;TNFAIP3;TAB3;TAB2;IKBKG;RPS27A
regulation of cell cycle G1/S phase transition (GO:1902806)	10/24	0.0661183	0.460303	0	0	1.61436	4.3851	FBXW7;STXBP4;KIF14;PSME1;E2F1;PSME2;FAM83D;PHB2;CDC73;TAF1
protein-DNA complex disassembly (GO:0032986)	9/21	0.0670831	0.466383	0	0	1.66049	4.48634	SMARCE1;SMARCC1;SUPT16H;PBRM1;SET;RPL23;GRWD1;MYC;HMGA1
cellular protein complex localization (GO:0034629)	9/21	0.0670831	0.465748	0	0	1.66049	4.48634	DLG1;SEH1L;MIOS;RCC2;TNFAIP2;EZR;GPN1;MZT1;EXOC1
negative regulation of RNA splicing (GO:0033119)	8/18	0.067193	0.465877	0	0	1.72199	4.64968	RPS26;PTBP1;RNPS1;SRSF7;SRSF10;PTBP2;RPS13;SRSF12
snRNA metabolic process (GO:0016073)	8/18	0.067193	0.465245	0	0	1.72199	4.64968	INTS12;INTS3;INTS2;INTS10;TUT1;INTS6;RPAP2;INTS8
positive regulation of proteasomal protein catabolic process (GO:1901800)	25/73	0.0676846	0.468014	0	0	1.32687	3.57313	PSMD10;GSK3B;VCP;FMR1;TMTC3;ATXN3;NUB1;SUMO1;RNF138;RNF19A;SUMO2;RNF217;BBS7;ARIH1;LONRF1;ANKIB1;FBXW7;CSNK1A1;PLK1;CSNK1D;RBX1;RFWD2;MDM2;TRIB3;TAF1
regulation of viral transcription (GO:0046782)	15/40	0.0692329	0.478072	0	0	1.45293	3.87972	DHX9;GTF2B;SUPT4H1;RSF1;GTF2F1;GTF2F2;POLR2A;MDFIC;PSMC3;POLR2B;POLR2F;POLR2G;POLR2H;POLR2J;POLR2K
regulation of primary metabolic process (GO:0080090)	44/139	0.0712123	0.491076	0	0	1.22645	3.24039	PSMD10;PSMD12;PSMD11;PSMD14;CHD9;ROCK2;ODC1;FHL2;HMGCR;PSMA7;CTGF;PSMD9;PSMD6;PSMD7;PSMD5;PSMD2;TGS1;PSMB1;ANKRD1;PSMD1;TBL1X;BBS4;MBD4;TXNRD1;NR1D2;CACYBP;AZIN1;TIAM2;PSMA5;PSMA6;PSMA3;PSMC5;PSMA4;PSMC6;PSMA1;PSMC3;TBL1XR1;PSMA2;PSMC1;PSME4;PSMC2;PSME1;PSME2;TRIB3
protein ubiquitination involved in ubiquitin-dependent protein catabolic process (GO:0042787)	24/70	0.0714967	0.492372	0	0	1.32839	3.50443	ANKIB1;HACE1;UBE3C;CUL5;SMURF2;CUL3;CUL2;CUL1;KLHL11;FBXO45;RNF7;RBX1;CUL4A;ITCH;RNF19A;BTBD3;NEDD4;UBR5;RNF217;SPOPL;TRIP12;ARIH1;CUL4B;SPSB4
stress-activated protein kinase signaling cascade (GO:0031098)	24/70	0.0714967	0.491709	0	0	1.32839	3.50443	MAP3K2;MAP2K4;CHUK;NEK4;MAPKAP1;STK39;CUL1;OXSR1;STK3;MAPK13;PAK1;SLK;STK24;TAOK1;NEK1;MAPK1;IKBKG;PAK3;RPS27A;MAP4K5;PAK2;MAP4K3;MAP3K5;MAP4K4
regulation of cellular protein metabolic process (GO:0032268)	18/50	0.0718914	0.493758	0	0	1.39481	3.67197	CYFIP1;MTPN;DDX6;EDN1;CDC123;CSF1;RPL10;UHRF1;NOLC1;WNT7A;INHBA;RBM3;TCOF1;GEMIN5;VPS35;EIF4E;METAP1;EIF2A
extrinsic apoptotic signaling pathway (GO:0097191)	23/67	0.0755501	0.518188	0	0	1.33004	3.43544	GSK3B;CASP8AP2;MOAP1;TGFB2;DDX3X;SMAD3;SIVA1;DDX47;TNFRSF10B;INHBA;TANK;CASP8;CASP3;BLOC1S2;BCL2;FAS;ITGAV;RIPK1;JAK2;BID;TLR3;BOK;APPL1
replication fork protection (GO:0048478)	4/7	0.0782387	0.535909	0	0	2.21398	5.6412	ZRANB3;BLM;TIPIN;TIMELESS
tRNA pseudouridine synthesis (GO:0031119)	4/7	0.0782387	0.53519	0	0	2.21398	5.6412	PUS3;RPUSD4;PUS10;PUS1
regulation of myosin-light-chain-phosphatase activity (GO:0035507)	4/7	0.0782387	0.534474	0	0	2.21398	5.6412	NUAK1;PPP1R12A;ROCK1;ROCK2
mitral valve development (GO:0003174)	4/7	0.0782387	0.533759	0	0	2.21398	5.6412	ACVR1;EFNA1;BMPR2;BMPR1A
sulfur amino acid biosynthetic process (GO:0000097)	4/7	0.0782387	0.533047	0	0	2.21398	5.6412	MTRR;MTHFD1;CTH;MTR
transcription-dependent tethering of RNA polymerase II gene DNA at nuclear periphery (GO:0000972)	4/7	0.0782387	0.532336	0	0	2.21398	5.6412	NUP107;NUP133;NUP155;NUP98
positive regulation of protein deubiquitination (GO:1903003)	4/7	0.0782387	0.531627	0	0	2.21398	5.6412	VCP;SART3;WDR48;TANK
response to type I interferon (GO:0034340)	4/7	0.0782387	0.53092	0	0	2.21398	5.6412	SETD2;SHMT2;ISG15;TRIM56
morphogenesis of a polarized epithelium (GO:0001738)	4/7	0.0782387	0.530215	0	0	2.21398	5.6412	RAB10;AHI1;TRAF3IP1;PTK7
positive regulation of mitotic sister chromatid separation (GO:1901970)	4/7	0.0782387	0.529512	0	0	2.21398	5.6412	ESPL1;CUL3;NSMCE2;DLGAP5
positive regulation of hemopoiesis (GO:1903708)	4/7	0.0782387	0.528811	0	0	2.21398	5.6412	CSF3;FOXC1;N4BP2L2;HOXA5
tRNA transcription (GO:0009304)	4/7	0.0782387	0.528111	0	0	2.21398	5.6412	GTF3C2;GTF3C3;GTF3C4;GTF3C6
endonucleolytic cleavage in ITS1 to separate SSU-rRNA from 5.8S rRNA and LSU-rRNA from tricistronic rRNA transcript (SSU-rRNA, 5.8S rRNA, LSU-rRNA) (GO:0000447)	4/7	0.0782387	0.527413	0	0	2.21398	5.6412	NOP14;RRS1;UTP20;KRI1
positive regulation of mRNA binding (GO:1902416)	4/7	0.0782387	0.526718	0	0	2.21398	5.6412	FMR1;EIF3E;EIF3C;EIF3D
regulation of establishment of protein localization (GO:0070201)	4/7	0.0782387	0.526024	0	0	2.21398	5.6412	DNAJA1;SCFD1;GAPVD1;CEP290
activation of cysteine-type endopeptidase activity involved in apoptotic process by cytochrome c (GO:0008635)	4/7	0.0782387	0.525332	0	0	2.21398	5.6412	APAF1;CASP3;CYCS;BOK
tetrahydrofolate interconversion (GO:0035999)	4/7	0.0782387	0.524641	0	0	2.21398	5.6412	MTHFD1;SHMT1;ATPIF1;TYMS
positive regulation of isomerase activity (GO:0010912)	4/7	0.0782387	0.523953	0	0	2.21398	5.6412	PLSCR1;DHX9;UHRF1;HNRNPU
regulation of protein deubiquitination (GO:0090085)	4/7	0.0782387	0.523266	0	0	2.21398	5.6412	OTUD4;ITCH;WDR48;TANK
regulation of protein localization to centrosome (GO:1904779)	4/7	0.0782387	0.522581	0	0	2.21398	5.6412	GSK3B;APC;CEP250;BICD1
metanephric nephron tubule development (GO:0072234)	4/7	0.0782387	0.521898	0	0	2.21398	5.6412	PAX8;OSR1;WNT7B;PKD2
purine nucleotide biosynthetic process (GO:0006164)	4/7	0.0782387	0.521217	0	0	2.21398	5.6412	PRPS1;MTHFD1;PPAT;ADA
rRNA-containing ribonucleoprotein complex export from nucleus (GO:0071428)	4/7	0.0782387	0.520537	0	0	2.21398	5.6412	NPM1;XPO1;ABCE1;RAN
positive regulation of metaphase/anaphase transition of cell cycle (GO:1902101)	4/7	0.0782387	0.519859	0	0	2.21398	5.6412	ESPL1;CUL3;NSMCE2;DLGAP5
positive regulation of cellular senescence (GO:2000774)	4/7	0.0782387	0.519183	0	0	2.21398	5.6412	HMGA1;HMGA2;EEF1E1;SIRT1
positive regulation of protein localization to membrane (GO:1905477)	31/95	0.0822567	0.545137	0	0	1.2643	3.15811	YWHAE;ITGB1;YWHAB;PDCD5;EFCAB7;MFF;CASP8;BCL2L11;YWHAQ;CNPY4;KIF5B;CHORDC1;E2F1;STX3;BID;YWHAH;PLS1;PRNP;PRKCI;ITGA3;ARHGEF16;PDZK1;DYNLL1;YWHAZ;DLG1;TFDP1;TFDP2;BCL2;NMT1;SQSTM1;EPHA2
positive regulation of fibroblast proliferation (GO:0048146)	11/28	0.0824438	0.545669	0	0	1.52211	3.79864	CDK6;DHX9;CDK4;MYC;SPHK1;PDGFC;E2F1;S100A6;LIG4;BMI1;DDR2
positive regulation of growth (GO:0045927)	24/71	0.082499	0.545327	0	0	1.30968	3.26761	PSMD10;USP47;MTPN;TGFB2;DDX3X;NCBP1;CSNK2A1;SPHK1;TAF9;H3F3A;ADAM10;DERL2;TGFBR1;CDKN2AIP;SUPV3L1;CDC42;RPS6KA3;SDCBP;EXOSC9;BCL2;FGFR1OP;FXN;EXOSC2;EIF4G2
protein targeting to membrane (GO:0006612)	21/61	0.0844563	0.557542	0	0	1.33383	3.2966	SRP19;TRAM1;PRKCI;ARL6IP1;ZDHHC20;ARL6;ZDHHC23;CHM;ZDHHC6;ZDHHC21;SRP14;ZDHHC2;SDCBP;PARD3;ATG4C;EXOC4;SSR1;SEC62;GOLGA7;SEC63;RAB8B
negative regulation of gene expression, epigenetic (GO:0045814)	10/25	0.0855789	0.564224	0	0	1.54979	3.80987	SUZ12;DNMT1;RBBP4;EED;H3F3A;MTF2;RBBP7;BMI1;PHF19;EZH2
negative regulation of cellular protein localization (GO:1903828)	10/25	0.0855789	0.563496	0	0	1.54979	3.80987	DNAJA1;GSK3B;CDT1;LEPROTL1;OTUD7B;GOPC;COMMD1;LZTFL1;TTBK2;PICALM
nucleotide-binding domain, leucine rich repeat containing receptor signaling pathway (GO:0035872)	10/25	0.0855789	0.56277	0	0	1.54979	3.80987	CYLD;ITCH;CASP8;CHUK;UBE2N;TNFAIP3;TAB3;TAB2;IKBKG;RPS27A
establishment of spindle localization (GO:0051293)	5/10	0.0878934	0.577246	0	0	1.93723	4.71064	ESPL1;SPAG5;NUSAP1;KPNB1;CLASP1
mitotic nuclear envelope reassembly (GO:0007084)	5/10	0.0878934	0.576504	0	0	1.93723	4.71064	ANKLE2;REEP3;VRK1;BANF1;PPP2R2A
RNA phosphodiester bond hydrolysis, endonucleolytic (GO:0090502)	5/10	0.0878934	0.575764	0	0	1.93723	4.71064	LAS1L;POP1;RPP30;DICER1;MRPL44
positive regulation of intracellular steroid hormone receptor signaling pathway (GO:0033145)	5/10	0.0878934	0.575025	0	0	1.93723	4.71064	YAP1;PAK1;BUD31;PARK7;TAF1
G1 DNA damage checkpoint (GO:0044783)	5/10	0.0878934	0.574289	0	0	1.93723	4.71064	CCND1;RFWD3;CDK2;RPA2;RPS27L
nuclear mRNA surveillance (GO:0071028)	5/10	0.0878934	0.573555	0	0	1.93723	4.71064	EXOSC7;EXOSC10;XRN1;EXOSC9;EXOSC8
intraciliary retrograde transport (GO:0035721)	5/10	0.0878934	0.572822	0	0	1.93723	4.71064	DYNC2H1;DYNC2LI1;TTC21B;WDR19;WDR35
polarized epithelial cell differentiation (GO:0030859)	5/10	0.0878934	0.572092	0	0	1.93723	4.71064	RAB10;CDC42;MSN;MYO9A;RHOA
ESCRT complex disassembly (GO:1904896)	5/10	0.0878934	0.571363	0	0	1.93723	4.71064	VPS4B;CHMP1B;CHMP2B;CHMP2A;CHMP5
mitotic G1/S transition checkpoint (GO:0044819)	5/10	0.0878934	0.570636	0	0	1.93723	4.71064	CCND1;RFWD3;CDK2;RPA2;RPS27L
negative regulation of sodium ion transmembrane transport (GO:1902306)	5/10	0.0878934	0.569911	0	0	1.93723	4.71064	CAMK2D;NEDD4;OSR1;STK39;COMMD1
aspartate family amino acid metabolic process (GO:0009066)	5/10	0.0878934	0.569188	0	0	1.93723	4.71064	MTRR;MTHFD1;GOT2;SMS;NIT2
ESCRT III complex disassembly (GO:1904903)	5/10	0.0878934	0.568466	0	0	1.93723	4.71064	VPS4B;CHMP1B;CHMP2B;CHMP2A;CHMP5
regulation of cell cycle arrest (GO:0071156)	17/48	0.090117	0.58211	0	0	1.37221	3.30242	CCNK;HSP90AB1;UHRF2;RPL23;HMGA2;BRCA1;PKD2;FOXM1;POU4F1;RRP8;HMGN5;CCND1;MYBBP1A;CDK4;MDM2;CALR;CRLF3
morphogenesis of an epithelium (GO:0002009)	8/19	0.0906679	0.584928	0	0	1.63135	3.91615	AHI1;WNT10A;TRAF3IP1;KRT16;TIMELESS;MPP5;LIN7C;ARHGAP12
positive regulation of interferon-alpha production (GO:0032727)	8/19	0.0906679	0.58419	0	0	1.63135	3.91615	SETD2;TBK1;CHUK;DHX9;DHX36;TLR4;TLR3;HSPD1
nucleotide-sugar biosynthetic process (GO:0009226)	8/19	0.0906679	0.583453	0	0	1.63135	3.91615	UGDH;UGP2;GNPDA2;GFPT1;PGM3;GNPNAT1;UAP1;NANS
telomere capping (GO:0016233)	8/19	0.0906679	0.582718	0	0	1.63135	3.91615	DCLRE1B;DCLRE1A;RAD50;PRKDC;ARTN;TINF2;TERF1;TERF2
production of small RNA involved in gene silencing by RNA (GO:0070918)	8/19	0.0906679	0.581985	0	0	1.63135	3.91615	TSNAX;TRIM71;ZC3H7A;DROSHA;DICER1;TSN;PUM2;MRPL44
positive regulation of cell cycle (GO:0045787)	27/82	0.0908573	0.582468	0	0	1.27574	3.05982	PSMD10;CCNK;CDKN1B;HSP90AB1;CITED2;CCNH;CCNC;CKS1B;CCNB1;HMGN5;RPS15A;CCND1;CHEK1;EIF4E;SRPK2;TGFB2;RPL23;SPHK1;USP22;ASNS;PRKCA;RPS6KB1;CDK4;CKS2;MDM2;PKN2;CALR
positive regulation of histone H3-K4 methylation (GO:0051571)	6/13	0.0914859	0.585762	0	0	1.78822	4.27664	DNMT1;SNW1;CTR9;CTNNB1;WDR61;BRCA1
mitochondrial genome maintenance (GO:0000002)	6/13	0.0914859	0.585028	0	0	1.78822	4.27664	PIF1;PARP1;OPA1;AKT3;LONP1;SLC25A36
B cell activation involved in immune response (GO:0002312)	6/13	0.0914859	0.584296	0	0	1.78822	4.27664	RNF168;MSH6;MSH2;RNF8;LIG4;EXOSC3
RNA interference (GO:0016246)	6/13	0.0914859	0.583566	0	0	1.78822	4.27664	TSNAX;DHX9;DROSHA;DICER1;TSN;MRPL44
nucleotide metabolic process (GO:0009117)	6/13	0.0914859	0.582837	0	0	1.78822	4.27664	DCTD;SMARCAD1;PARK7;NUDT5;DCK;NUDT4
ribonucleoprotein complex disassembly (GO:0032988)	6/13	0.0914859	0.58211	0	0	1.78822	4.27664	MCTS1;DYRK3;KIF5B;MTIF2;DENR;KLC1
tRNA splicing, via endonucleolytic cleavage and ligation (GO:0006388)	6/13	0.0914859	0.581386	0	0	1.78822	4.27664	TSEN15;DDX1;CSTF2;ZBTB8OS;FAM98B;TSEN2
modulation by virus of host process (GO:0019054)	6/13	0.0914859	0.580662	0	0	1.78822	4.27664	CCNK;KPNA4;KPNA2;KPNA3;KPNB1;KPNA1
negative regulation of immune effector process (GO:0002698)	7/16	0.0919431	0.582839	0	0	1.69508	4.04545	ITCH;PPM1B;FER;RPS19;TRAF3IP1;PCBP2;RC3H1
regulation of exosomal secretion (GO:1903541)	7/16	0.0919431	0.582116	0	0	1.69508	4.04545	SDCBP;TSG101;SDC4;VPS4B;CHMP2A;STAM;SNF8
negative regulation of translational initiation (GO:0045947)	7/16	0.0919431	0.581395	0	0	1.69508	4.04545	PAIP2B;FMR1;TPR;EIF3E;PAIP2;EIF2S1;ATF4
miRNA metabolic process (GO:0010586)	7/16	0.0919431	0.580675	0	0	1.69508	4.04545	TRIM71;ZCCHC11;XPO5;DROSHA;DGCR8;DICER1;RAN
regulation of histone H3-K4 methylation (GO:0051569)	7/16	0.0919431	0.579957	0	0	1.69508	4.04545	DNMT1;SNW1;CTR9;CTNNB1;WDR61;BRCA1;BCOR
mitochondrial gene expression (GO:0140053)	16/45	0.0952736	0.600224	0	0	1.37759	3.23871	MRPS17;PTCD3;PNPT1;MRPS11;MRPL16;GATC;MRPS21;MRPS18A;MRPL47;TFB2M;MRPS7;MRPS18C;LARS2;FASTKD5;TFAM;HARS
positive regulation of secretion by cell (GO:1903532)	18/52	0.100153	0.630188	0	0	1.34116	3.08608	UNC13B;EDN1;TGFB2;GOLPH3L;IL1A;ANKRD1;MYO18A;ADAM9;STXBP5;DNM1L;EZR;PPIA;MYH10;RAB5A;PPID;CLASP1;EXOC1;EXPH5
positive regulation of protein ubiquitination (GO:0031398)	27/83	0.102782	0.64593	0	0	1.26037	2.86753	PSMD10;KDM1A;DCUN1D5;PHF23;CUL3;DCUN1D4;PTEN;DCUN1D1;XIAP;BRCA1;BCL10;BMI1;RNF139;RPS2;CDK5RAP3;FANCI;FBXW7;SPHK1;PLK1;AXIN1;COMMD1;SENP2;TOPORS;PTK2;FKBP1A;UBE2N;TRIB3
TRIF-dependent toll-like receptor signaling pathway (GO:0035666)	11/29	0.103033	0.64671	0	0	1.46963	3.34003	CASP8;TBK1;CHUK;UBE2D2;UBE2D3;RIPK1;IKBKG;RPS27A;TANK;TLR4;TLR3
cellular response to interleukin-1 (GO:0071347)	46/150	0.103323	0.647737	0	0	1.18817	2.69702	PSMD10;PSMD12;PSMD11;PSMD14;USP10;CUL1;IL1RAP;HIF1A;TANK;PSMA7;PSMD9;PSMD6;PSMD7;RPS6KA5;PSMD5;PSMD2;PSMB1;ANKRD1;PSMD1;HAS2;IKBKG;RPS27A;CHUK;CCL20;RC3H1;RBX1;MAPK13;PSMA5;IL1A;PSMA6;PSMA3;PSMC5;PSMA4;PSMC6;PSMA1;PSMC3;PSMA2;PSMC1;PSME4;PSMC2;PSME1;UBE2N;PSME2;TAB3;TAB2;SQSTM1
regulation of extrinsic apoptotic signaling pathway (GO:2001236)	20/59	0.103647	0.648972	0	0	1.31338	2.97712	ACVR1;TNFRSF12A;FEM1B;TNFRSF10B;PARK7;BCL10;TANK;THBS1;SH3RF1;TGFBR1;CYLD;CASP8;FAS;ITGAV;ITGA6;PHIP;RIPK1;ZMYND11;BID;PAK2
cellular response to light stimulus (GO:0071482)	22/66	0.106098	0.663503	0	0	1.29149	2.89732	USP47;NPM1;PCNA;KDM1A;PARP1;FMR1;RHBDD1;PTPRK;TRIAP1;RNF7;EIF2S1;CDC25A;AURKB;MAPK13;RUVBL2;MYC;NEDD4;RPL26;N4BP1;ATF4;ATR;TAF1
regulation of RNA metabolic process (GO:0051252)	14/39	0.106584	0.665729	0	0	1.39083	3.11382	USP36;MBD4;SRRM4;MBNL2;AHNAK;RRP1B;CLK4;HNRNPH1;TRA2B;RASA1;ESRP1;HNRNPF;ZNF326;MBNL3
positive regulation of interferon-beta production (GO:0032728)	10/26	0.108143	0.674641	0	0	1.49018	3.3146	DDX3X;TBK1;POLR3A;POLR3B;DHX9;POLR3D;POLR3F;POLR3G;TLR4;TLR3
regulation of histone acetylation (GO:0035065)	10/26	0.108143	0.673817	0	0	1.49018	3.3146	SETD5;SET;RPS6KA5;TADA2A;RUVBL2;CHEK1;TAF7;BRCA1;BRD7;IWS1
cytoskeleton-dependent intracellular transport (GO:0030705)	10/26	0.108143	0.672995	0	0	1.49018	3.3146	DYNC1I2;CCDC88A;KIF3B;HOOK2;HOOK1;KIF5B;KIF14;KIF3C;HOOK3;DYNLL1
regulation of apoptotic process (GO:0042981)	226/815	0.108401	0.673775	0	0	1.07439	2.38721	ANKLE2;ARL6IP1;SCX;PHB2;IFIT2;RPS6KA3;LGALS1;MYC;CHEK2;SKP2;HOXA5;UNC13B;PRKCI;EPHA8;ACTN1;TIAM2;TIAM1;TYRO3;YME1L1;EPHA1;ATF6;ATF4;EPHA2;ANP32A;PRKDC;BCL10;MTDH;PRDX2;PDCD10;FIGNL1;BARD1;TSLP;GADD45B;GADD45A;PLK2;PLK1;PA2G4;PTK2;SETX;HNRNPK;ANP32E;RNPS1;ATM;CALR;ANP32B;TOP2A;CITED2;FAF1;KIF14;CHM;BRCA1;IER3IP1;AATF;SH3RF1;ING5;ING3;AIFM1;ANKRD1;JAK2;HTATIP2;VAV3;ANXA1;TNFRSF12A;SPHK1;ANXA4;NME2;…
ERBB signaling pathway (GO:0038127)	26/80	0.10878	0.675307	0	0	1.2592	2.79345	CUL5;TGFA;IQGAP1;PIK3C2A;EPS8;NRAS;RPS6KA5;ABL2;MAPK1;CPNE3;RPS27A;EPS15;FAM83B;HSP90AA1;STYK1;NRG1;PRKCA;PTPN11;PTPN12;PTK2;PIK3CA;KIF16B;CDC37;KRAS;SOS1;HBEGF
regulation of protein serine/threonine kinase activity (GO:0071900)	26/80	0.10878	0.674486	0	0	1.2592	2.79345	CCNK;BLM;DDX3X;CDKN1B;TSG101;BCCIP;PTEN;PDCD10;CDK5RAP3;GADD45A;GTF2H1;CDC6;CDC25C;SIRT1;RHOA;CDC25A;GTPBP4;ETAA1;CCNE2;CDC37;TRIB3;CDK12;MNAT1;CALM2;CDKN3;EZH2
positive regulation of cellular component biogenesis (GO:0044089)	28/87	0.109321	0.677022	0	0	1.24695	2.76009	GSK3B;VCP;TSG101;SDC4;FAF1;VPS4B;CLSTN1;IL1RAP;SDCBP;SUMO1;TPR;RPS3;FNIP1;FNIP2;CDT1;WARS;SMAD3;BDNF;WNT7A;PRKCA;STAM;SNF8;TERF1;ERCC1;DLG5;CHMP2A;ATM;ATR
regulation of small GTPase mediated signal transduction (GO:0051056)	43/140	0.109925	0.679936	0	0	1.19001	2.6275	ARHGAP11A;ARHGAP8;FAM13B;GDI2;ARHGDIG;ARHGAP19;ARHGAP18;FOXM1;ARHGAP5;FGD1;ARHGAP12;SYDE2;FGD3;CDC42;ARHGAP21;FGD4;RHOT1;RACGAP1;SRGAP3;SRGAP2;ECT2;CGNL1;VAV3;ARHGEF16;ARAP2;OCRL;RHOC;RHOD;MYO9A;RHOA;CD2AP;TIAM2;TIAM1;ARHGAP32;ARHGAP10;DEPDC1B;DEPDC7;RHOU;ARHGEF2;SOS1;SQSTM1;SOS2;ARHGEF5
positive regulation of apoptotic process (GO:0043065)	89/307	0.112548	0.695316	0	0	1.12322	2.45353	TOP2A;ITGB1;BTG1;DDX3X;FAF1;PDCD5;HMGB1;UBE2Z;IFIT2;ING5;ING3;AIFM1;FAM162A;MYC;ANKRD1;CASP1;DNM1L;HOXA5;MAP3K5;BOK;UNC13B;VAV3;BNIP3L;TNFRSF12A;APAF1;RPS6;F2R;ARHGEF16;PAWR;SIRT1;TGFBR1;TIAM2;LATS1;TIAM1;MELK;SHQ1;DDIT3;PTRH2;ITGA6;ARHGEF2;EEF1E1;SOS1;ATF6;SQSTM1;SOS2;ARHGEF5;PPID;ITGB3BP;ATF4;USP27X;DDX20;HTRA2;BCL10;PSEN1;FGD1;STK3;HSPD1;FGD3;FGD4;BCLAF1;BCL2L11;RPS3;E2F1;RIPK1;RPS27A;BID;ECT2…
endosome organization (GO:0007032)	13/36	0.112781	0.695914	0	0	1.39911	3.0533	PI4K2B;USP8;AKTIP;SNX10;DNAJC13;HOOK3;CLCN3;RAB22A;HOOK2;ALS2;HOOK1;CHMP2B;SQSTM1
regulation of proteolysis involved in cellular protein catabolic process (GO:1903050)	9/23	0.113269	0.69808	0	0	1.5161	3.30205	EFNA1;LATS1;USP14;TMF1;PSMD14;ATPIF1;PSME1;PSME2;UCHL5
apoptotic nuclear changes (GO:0030262)	9/23	0.113269	0.697238	0	0	1.5161	3.30205	TOP2A;H1F0;CASP3;HMGB2;DICER1;HMGB1;KPNB1;CDK5RAP3;KPNA1
microtubule polymerization or depolymerization (GO:0031109)	9/23	0.113269	0.696398	0	0	1.5161	3.30205	KIF18A;KIF18B;KIF2A;TRPV4;CENPJ;STMN1;KIF24;KIF2C;CKAP5
positive regulation of cell growth (GO:0030307)	31/98	0.115483	0.70916	0	0	1.2256	2.64561	PSMD10;MTPN;DDX3X;TAF9;DERL2;CDKN2AIP;RIMS2;CDC42;RPS6KA3;SDCBP;GOLGA4;EXOSC9;EXOSC2;SYT4;USP47;TGFB2;EDN1;CDKL5;CSNK2A1;NCBP1;BDNF;SPHK1;H3F3A;ADAM10;TGFBR1;SUPV3L1;BCL2;PLAA;FGFR1OP;FXN;EIF4G2
protein modification process (GO:0036211)	27/84	0.115669	0.709444	0	0	1.24536	2.68628	LIPT1;PRKDC;UBE2D2;UBE2D3;PLOD2;FBXO22;UBL5;PPP4R2;ABL2;SEPHS1;CSNK1G3;USP25;SLC35A1;MANBA;PARP4;UBE2I;YES1;PARP1;FBXO2;WDYHV1;RABGGTB;FBXO11;UBE2S;UBE2N;UBA3;CPE;PADI4
mesoderm formation (GO:0001707)	8/20	0.118249	0.724399	0	0	1.54979	3.30874	ITGB1;SMAD2;BMPR2;ITGA3;ITGA2;AXIN1;SCX;HMGA2
histone H3 acetylation (GO:0043966)	15/43	0.119348	0.730254	0	0	1.35156	2.87303	DR1;BRD1;TAF12;TAF9;ELP3;ELP4;BRCA2;TAF5L;SUPT3H;POLE4;ING5;TADA2A;POLE3;WDR5;MBIP
regulation of cytoskeleton organization (GO:0051493)	30/95	0.122037	0.745815	0	0	1.22352	2.57358	GSK3B;CLIC4;ROCK1;TRAF3IP1;ROCK2;RHOBTB3;NEXN;ARHGAP18;EFNA5;BICD1;RND3;RND1;CDC42;STMN1;MAPK1;RICTOR;CLASP1;RHOC;RHOD;RHOA;PTK2;CYLD;CCDC88A;TAOK1;RHOU;PFDN2;PLXNB1;PHLDB2;CRK;ARHGEF5
positive regulation of protein catabolic process (GO:0045732)	26/81	0.122439	0.747375	0	0	1.24366	2.61186	GSK3B;VCP;CDKN1B;TNFAIP3;IDE;VPS35;SNX9;SH3D19;BARD1;HSP90AA1;CSNK2A1;SMURF2;TIPARP;PLK2;RDX;AXIN1;MSN;SNF8;DDB1;ITCH;APC;NEDD4;ADAM9;SEC22B;EZR;DTL
DNA packaging (GO:0006323)	7/17	0.122801	0.748688	0	0	1.59537	3.3458	NIPBL;CHAF1B;CHAF1A;RBBP4;AIFM1;HAT1;ASH1L
positive regulation of cellular protein catabolic process (GO:1903364)	7/17	0.122801	0.747794	0	0	1.59537	3.3458	HSP90AA1;RNF128;RDX;ATPIF1;MSN;VPS35;EZR
peptidyl-lysine trimethylation (GO:0018023)	7/17	0.122801	0.746903	0	0	1.59537	3.3458	SUV39H2;SETD2;SETD3;SUV39H1;CTR9;BEND3;WDR61
serine family amino acid metabolic process (GO:0009069)	7/17	0.122801	0.746014	0	0	1.59537	3.3458	MTHFD1;SHMT2;SHMT1;CTH;SARS;SLC25A32;PSPH
septin ring organization (GO:0031106)	7/17	0.122801	0.745127	0	0	1.59537	3.3458	SEPT8;SEPT10;ANLN;SEPT11;SEPT7;RTKN2;SEPT2
cellular response to inorganic substance (GO:0071241)	7/17	0.122801	0.744242	0	0	1.59537	3.3458	BLM;FMR1;DDX11;ATRX;CDK2;TIMELESS;MTR
positive regulation of JUN kinase activity (GO:0043507)	17/50	0.123749	0.749102	0	0	1.31732	2.75253	MAP3K2;SPAG9;MAP2K4;EDN1;DUSP19;AXIN1;TANK;PAK1;MDFIC;TAOK1;DVL2;RPS3;RIPK1;MAP3K9;MAP4K5;ARHGEF5;MAP3K5
peptidyl-serine phosphorylation (GO:0018105)	44/145	0.124479	0.752625	0	0	1.1757	2.44971	GSK3B;CAMK2D;PRKDC;TNKS;ROCK2;STK39;TTBK2;RPS6KA3;TBK1;CHEK2;AKT3;TLK2;PDK3;STK38L;MAPK1;RIPK1;RICTOR;CLSPN;PAK2;CSNK1G3;MORC3;PRKCI;CHUK;CSNK1A1;PLK2;PLK1;VRK1;CSNK1D;PRKCA;CDC7;VRK2;MASTL;TGFBR1;MAPK13;LATS1;CDK2;CDK1;ATM;SGK3;PKN2;TOP1;CSNK1G1;ATR;TAF1
regulation of fibroblast apoptotic process (GO:2000269)	4/8	0.125285	0.756604	0	0	1.93723	4.02395	BCL2L11;BTG1;STK17B;IER3IP1
endodermal cell fate commitment (GO:0001711)	4/8	0.125285	0.75571	0	0	1.93723	4.02395	CTR9;LEO1;RTF1;CDC73
protein localization to microtubule (GO:0035372)	4/8	0.125285	0.754818	0	0	1.93723	4.02395	CRIPT;HNRNPU;KIF20B;MAPRE1
positive regulation of metanephros development (GO:0072216)	4/8	0.125285	0.753928	0	0	1.93723	4.02395	PAX8;BASP1;MYC;LIF
protein localization to microtubule cytoskeleton (GO:0072698)	4/8	0.125285	0.75304	0	0	1.93723	4.02395	CRIPT;KIF20B;FAM83D;MAPRE1
negative regulation of hippo signaling (GO:0035331)	4/8	0.125285	0.752154	0	0	1.93723	4.02395	WWC1;DLG5;WWC2;MARK3
histone H4 deacetylation (GO:0070933)	4/8	0.125285	0.75127	0	0	1.93723	4.02395	HDAC2;HDAC1;SMARCAD1;RCOR1
positive regulation of mRNA 3'-end processing (GO:0031442)	4/8	0.125285	0.750388	0	0	1.93723	4.02395	NCBP1;NCBP2;LEO1;CDC73
regulation of cytoplasmic mRNA processing body assembly (GO:0010603)	4/8	0.125285	0.749508	0	0	1.93723	4.02395	CNOT6;CNOT6L;CNOT1;CNOT2
glomerular epithelial cell development (GO:0072310)	4/8	0.125285	0.748631	0	0	1.93723	4.02395	NUP93;MYO1E;JAG1;IQGAP1
positive regulation of mitochondrial membrane permeability involved in apoptotic process (GO:1902110)	4/8	0.125285	0.747755	0	0	1.93723	4.02395	ATF2;BNIP3L;RHOT1;BLOC1S2
actin filament network formation (GO:0051639)	4/8	0.125285	0.746882	0	0	1.93723	4.02395	ACTN1;COBL;PLS3;PLS1
positive regulation of chromatin silencing (GO:0031937)	4/8	0.125285	0.74601	0	0	1.93723	4.02395	DNMT1;SETDB1;MIER1;SIRT1
snoRNA 3'-end processing (GO:0031126)	4/8	0.125285	0.745141	0	0	1.93723	4.02395	FBL;DKC1;EXOSC3;EXOSC2
positive regulation of protein homodimerization activity (GO:0090073)	4/8	0.125285	0.744273	0	0	1.93723	4.02395	GNL3L;PARK7;TANK;TIRAP
phosphatidylinositol-3-phosphate biosynthetic process (GO:0036092)	4/8	0.125285	0.743408	0	0	1.93723	4.02395	PIK3CA;PIK3C3;PIK3CB;PIK3C2A
nose development (GO:0043584)	4/8	0.125285	0.742544	0	0	1.93723	4.02395	SMCHD1;SIX4;AXIN1;GLI3
regulation of peroxisome proliferator activated receptor signaling pathway (GO:0035358)	4/8	0.125285	0.741683	0	0	1.93723	4.02395	ASXL1;CITED2;ASXL2;SIRT1
tRNA aminoacylation for mitochondrial protein translation (GO:0070127)	4/8	0.125285	0.740824	0	0	1.93723	4.02395	DARS2;GARS;TARS2;WARS2
kidney mesenchyme development (GO:0072074)	4/8	0.125285	0.739966	0	0	1.93723	4.02395	SIX4;BASP1;OSR1;PKD2
positive regulation of cell aging (GO:0090343)	4/8	0.125285	0.739111	0	0	1.93723	4.02395	HMGA1;HMGA2;EEF1E1;SIRT1
mRNA cleavage (GO:0006379)	4/8	0.125285	0.738257	0	0	1.93723	4.02395	PCF11;CSTF3;CPSF3;WDR33
glomerular visceral epithelial cell development (GO:0072015)	4/8	0.125285	0.737406	0	0	1.93723	4.02395	NUP93;MYO1E;JAG1;IQGAP1
negative regulation of anion transmembrane transport (GO:1903960)	4/8	0.125285	0.736556	0	0	1.93723	4.02395	OSR1;STK39;GOPC;THBS1
SMAD protein complex assembly (GO:0007183)	4/8	0.125285	0.735709	0	0	1.93723	4.02395	FKBP1A;SMAD2;SMAD3;ZFYVE9
regulation of PERK-mediated unfolded protein response (GO:1903897)	4/8	0.125285	0.734863	0	0	1.93723	4.02395	PPP1R15A;HSPA5;BOK;NCK1
desmosome organization (GO:0002934)	4/8	0.125285	0.734019	0	0	1.93723	4.02395	DSP;PERP;DSG2;PRKCA
establishment of Golgi localization (GO:0051683)	4/8	0.125285	0.733177	0	0	1.93723	4.02395	CDC42;ARHGAP21;PDCD10;YWHAZ
MyD88-independent toll-like receptor signaling pathway (GO:0002756)	11/30	0.126352	0.738574	0	0	1.42064	2.93885	CASP8;TBK1;CHUK;UBE2D2;UBE2D3;RIPK1;IKBKG;RPS27A;TANK;TLR4;TLR3
regulation of intracellular estrogen receptor signaling pathway (GO:0033146)	11/30	0.126352	0.737729	0	0	1.42064	2.93885	YAP1;LATS1;PAK1;UFM1;CBFB;CNOT1;UBA5;CNOT2;AXIN1;BRCA1;STRN3
retrograde transport, endosome to plasma membrane (GO:1990126)	6/14	0.126397	0.737147	0	0	1.66049	3.43443	VPS29;ANKRD27;SNX27;VPS26A;VPS35;ANKRD50
regulation of defense response to virus (GO:0050688)	6/14	0.126397	0.736306	0	0	1.66049	3.43443	ITCH;PPM1B;DHX9;TRAF3IP1;PCBP2;TNFAIP3
cellular protein complex disassembly (GO:0043624)	6/14	0.126397	0.735466	0	0	1.66049	3.43443	NAPB;MTRF1;VPS4B;ETF1;ABCE1;GSPT1
RNA splicing, via endonucleolytic cleavage and ligation (GO:0000394)	6/14	0.126397	0.734628	0	0	1.66049	3.43443	TSEN15;DDX1;CSTF2;ZBTB8OS;FAM98B;TSEN2
regulation of response to interferon-gamma (GO:0060330)	6/14	0.126397	0.733793	0	0	1.66049	3.43443	HSP90AB1;SUMO1;CDC37;PARP9;JAK2;PTPN2
establishment of mitotic spindle orientation (GO:0000132)	6/14	0.126397	0.732959	0	0	1.66049	3.43443	GPSM2;NDE1;CENPA;NDC80;CDK5RAP2;PAFAH1B1
stem cell development (GO:0048864)	6/14	0.126397	0.732127	0	0	1.66049	3.43443	TCOF1;WNT7A;NOLC1;KLHL12;NRG1;KBTBD8
regulation of phosphate metabolic process (GO:0019220)	6/14	0.126397	0.731297	0	0	1.66049	3.43443	IGBP1;BARD1;MCM7;RAD17;RICTOR;PSEN1
positive regulation of posttranscriptional gene silencing (GO:0060148)	5/11	0.127993	0.739694	0	0	1.76112	3.62047	FXR1;DHX9;FMR1;XPO5;PUM2
regulation of histone H3-K9 methylation (GO:0051570)	5/11	0.127993	0.738858	0	0	1.76112	3.62047	INSL6;DNMT1;ATRX;BRCA1;SIRT1
positive regulation of cell cycle phase transition (GO:1901989)	5/11	0.127993	0.738023	0	0	1.76112	3.62047	NPM1;STXBP4;FAM83D;PHB2;CDC73
regulation of mitotic centrosome separation (GO:0046602)	5/11	0.127993	0.73719	0	0	1.76112	3.62047	RANBP2;RANBP1;CHEK1;NEK2;KIF11
phosphatidylinositol dephosphorylation (GO:0046856)	5/11	0.127993	0.736359	0	0	1.76112	3.62047	MTMR2;INPP5F;SACM1L;PTEN;MTM1
regulation of phosphorylation of RNA polymerase II C-terminal domain (GO:1901407)	5/11	0.127993	0.735529	0	0	1.76112	3.62047	CCNK;CCNH;CCNC;PPIL4;BRD4
transcytosis (GO:0045056)	5/11	0.127993	0.734702	0	0	1.76112	3.62047	USO1;CLTC;VPS35;RAB5A;PICALM
methionine metabolic process (GO:0006555)	5/11	0.127993	0.733876	0	0	1.76112	3.62047	AHCY;MTRR;MTHFD1;SMS;MTR
modulation by host of viral genome replication (GO:0044827)	5/11	0.127993	0.733053	0	0	1.76112	3.62047	CCNK;FMR1;YTHDC2;NUCKS1;PPIB
mitotic spindle elongation (GO:0000022)	5/11	0.127993	0.732231	0	0	1.76112	3.62047	RACGAP1;PRC1;KIF23;AURKB;CDC14B
magnesium ion transport (GO:0015693)	5/11	0.127993	0.731411	0	0	1.76112	3.62047	MMGT1;NIPAL1;TUSC3;NIPA1;MAGT1
L-serine metabolic process (GO:0006563)	5/11	0.127993	0.730593	0	0	1.76112	3.62047	PSAT1;SHMT2;SHMT1;PHGDH;PSPH
regulation of receptor biosynthetic process (GO:0010869)	5/11	0.127993	0.729777	0	0	1.76112	3.62047	EDN1;HDAC2;HDAC1;HIF1A;HOXA5
regulation of symbiosis, encompassing mutualism through parasitism (GO:0043903)	5/11	0.127993	0.728962	0	0	1.76112	3.62047	VPS4B;FUCA2;CHMP4C;CHMP2A;EXOC2
UDP-N-acetylglucosamine biosynthetic process (GO:0006048)	5/11	0.127993	0.728149	0	0	1.76112	3.62047	GNPDA2;GFPT1;PGM3;GNPNAT1;UAP1
negative regulation of protein localization to nucleus (GO:1900181)	5/11	0.127993	0.727339	0	0	1.76112	3.62047	GSK3B;MDFIC;POLR1A;CHORDC1;OTUD7B
UV-damage excision repair (GO:0070914)	5/11	0.127993	0.72653	0	0	1.76112	3.62047	DDB1;ERCC1;XPC;SIRT1;CUL4B
positive regulation of organelle assembly (GO:1902117)	16/47	0.131475	0.745466	0	0	1.31897	2.6761	PLK4;SH3GLB1;GPSM2;EDN1;CSF2;CNOT6L;SDC4;SPAG5;ASAP1;SDCBP;CCDC88A;CNOT6;CNOT1;CNOT2;BBS4;RAB3GAP1
histone H4 acetylation (GO:0043967)	16/47	0.131475	0.744638	0	0	1.31897	2.6761	PHF20;ACTL6A;MSL3;YEATS4;ELP3;ELP4;BRCA2;MORF4L1;ING3;RUVBL2;MORF4L2;RUVBL1;HAT1;WDR5;BEND3;BRD8
modulation by host of viral transcription (GO:0043921)	10/27	0.133752	0.756695	0	0	1.43499	2.88686	SNW1;PSMC3;HDAC1;GTF2B;TAF11;HMGA2;NUCKS1;RRP1B;TARDBP;CHD1
regulation of protein localization to nucleus (GO:1900180)	10/27	0.133752	0.755857	0	0	1.43499	2.88686	GSK3B;CARD10;PLK1;LIF;CDK1;OTUD7B;PARK7;PARP9;GTSE1;CDK5RAP3
regulation of autophagy of mitochondrion (GO:1903146)	10/27	0.133752	0.755021	0	0	1.43499	2.88686	USP36;HAX1;FBXW7;RUVBL1;CSNK2A2;HTRA2;WDR75;PARK7;DNM1L;WBP11
regulation of intracellular steroid hormone receptor signaling pathway (GO:0033143)	10/27	0.133752	0.754186	0	0	1.43499	2.88686	LATS1;DDX5;UFM1;CBFB;UBA5;SAFB2;AXIN1;RNF6;PARK7;CALR
actin filament bundle assembly (GO:0051017)	13/37	0.1346	0.75813	0	0	1.3613	2.73001	PAWR;RHOC;RND3;RHOD;RHOA;HSP90B1;RND1;EPS8;MYO1B;BAIAP2L1;PLS3;EZR;PLS1
protein phosphorylation (GO:0006468)	132/470	0.138742	0.780594	0	0	1.08815	2.14925	GMFB;IGF1R;RPS6KA3;RPS6KA6;PPP4R1;TBK1;SLK;RPS6KA5;CHEK2;AKT3;CHEK1;NEK1;PDK3;NEK2;MAP3K9;NEK3;PRKACB;MAP3K5;CDKL2;ACVR1;CSNK1G3;PRKCI;MORC3;CDKL5;CSNK2A1;EPHA8;OSR1;ADAM10;PRKCA;VRK1;PRPF4B;CSNK1D;VRK2;PASK;ILF3;MELK;TYRO3;EPHA1;CSNK1G1;PRKDC;TNKS;STK39;TTBK2;STK3;NUAK1;PRDX4;ABL2;STK38L;RIPK1;CLSPN;CDK17;PLK4;SRPK2;SMAD2;CDK19;TGFB2;NEK4;PLK2;PLK1;NEK7;EIF2AK2;CDC7;PTK2;SRPK1;FER;CDK6;STK24;CDK…
dendritic spine organization (GO:0097061)	9/24	0.141559	0.795567	0	0	1.45293	2.84053	CDC42;PRNP;MTMR2;PTEN;WNT7A;PICK1;WASL;PAK3;IGF1R
proteasomal ubiquitin-independent protein catabolic process (GO:0010499)	9/24	0.141559	0.794692	0	0	1.45293	2.84053	PSMA5;PSMA6;PSMA3;PSMA4;PSMA1;PSMA2;PSME4;PSMB1;PSMA7
cellular senescence (GO:0090398)	9/24	0.141559	0.793819	0	0	1.45293	2.84053	OPA1;NSMCE2;HMGA1;HMGA2;SMC5;SMC6;CALR;TERF2;SIRT1
positive regulation of cell division (GO:0051781)	14/41	0.148808	0.833554	0	0	1.32299	2.52042	CUL3;KIF14;KIF23;CDC6;AURKB;RHOA;CIT;CDC42;SPAST;RACGAP1;CSPP1;PKN2;ECT2;KIF20B
antigen processing and presentation of exogenous peptide antigen (GO:0002478)	30/97	0.149728	0.837787	0	0	1.19829	2.27547	DCTN6;DYNC1I2;SEC23A;CLTC;KIF11;KLC1;KIF15;RACGAP1;KIF3B;KIF3A;CTSL;AP1S2;AP1S1;AP1S3;KIF3C;KIFAP3;KIF23;KIF22;AP2B1;DYNLL1;DYNC1LI1;CENPE;DYNC1LI2;KIF18A;KIF2A;CAPZA1;CANX;CAPZA2;KIF2C;ACTR10
antigen processing and presentation of exogenous peptide antigen via MHC class II (GO:0019886)	30/97	0.149728	0.836869	0	0	1.19829	2.27547	DCTN6;DYNC1I2;SEC23A;CLTC;KIF11;KLC1;KIF15;RACGAP1;KIF3B;KIF3A;CTSL;AP1S2;AP1S1;AP1S3;KIF3C;KIFAP3;KIF23;KIF22;AP2B1;DYNLL1;DYNC1LI1;CENPE;DYNC1LI2;KIF18A;KIF2A;CAPZA1;CANX;CAPZA2;KIF2C;ACTR10
GTP metabolic process (GO:0046039)	8/21	0.149736	0.835997	0	0	1.47599	2.80273	OPA1;RAB23;IMPDH2;GNAI3;MBIP;MFN1;AK4;RAN
positive regulation of translational initiation (GO:0045948)	8/21	0.149736	0.835084	0	0	1.47599	2.80273	PPP1R15A;KHDRBS1;YTHDF1;CDC123;DDX3X;YTHDF3;RPS6KB1;POLR2G
regulation of nuclear division (GO:0051783)	8/21	0.149736	0.834172	0	0	1.47599	2.80273	PRMT5;CDC16;RCC1;NEK2;FBXO5;MKI67;CDC25C;KIF20B
negative regulation of cell cycle arrest (GO:0071157)	8/21	0.149736	0.833262	0	0	1.47599	2.80273	CCNK;HSP90AB1;HMGN5;CCND1;CDK4;RPL23;MDM2;CALR
establishment of spindle orientation (GO:0051294)	8/21	0.149736	0.832355	0	0	1.47599	2.80273	GPSM2;SPAG5;NDE1;CENPA;NDC80;CLASP1;CDK5RAP2;PAFAH1B1
regulation of programmed cell death (GO:0043067)	77/268	0.1516	0.8418	0	0	1.11319	2.10004	RBM25;DDX42;CHM;BRCA1;TRIAP1;TM7SF3;LGALS1;SLK;CASP8;MECOM;OPA1;CHEK2;CASP1;NEK1;SKP2;JAK2;IFT57;MAP2K4;BNIP3L;USP47;APAF1;ACTN1;NME2;OXSR1;RABGGTB;SIRT1;NME1;HAX1;PAX8;BIRC5;SGK3;PPID;VCP;ANP32A;GLS2;AMIGO2;STK39;TANK;NDRG1;RTN4;STK3;PRDX2;WRN;PAK1;BCL2L11;PERP;RPS3;ABL2;RIPK1;NAE1;RPS27A;BID;MAP4K5;PAK3;DCPS;PAK2;MAP4K3;MAP4K4;MAP3K2;MOAP1;TGFB2;NEK4;TNFRSF10B;INHBA;POU4F1;RSL1D1;PSMC5;STK24;AP…
regulation of mitochondrion organization (GO:0010821)	16/48	0.152155	0.843962	0	0	1.29149	2.43169	USP36;GSK3B;FBXW7;ATPIF1;CSNK2A2;HTRA2;WDR75;MFF;WBP11;MARCH5;RHOT1;HAX1;RUVBL1;VPS35;DNM1L;SQSTM1
intrinsic apoptotic signaling pathway in response to DNA damage (GO:0008630)	16/48	0.152155	0.843046	0	0	1.29149	2.43169	MOAP1;RPS27L;HTRA2;BRCA1;SIRT1;TOPORS;MSH6;BCL2L11;SNW1;MSH2;CHEK2;E2F1;BCL2;FNIP2;BOK;EPHA2
anterograde axonal transport (GO:0008089)	11/31	0.152309	0.842987	0	0	1.37481	2.58718	FXR1;AP3M1;SPAST;KIF3B;KIF3A;FMR1;BLOC1S2;AP3B1;AP3S1;HAP1;TERF2
positive regulation of apoptotic signaling pathway (GO:2001235)	24/76	0.153842	0.850549	0	0	1.22352	2.29021	GSK3B;MOAP1;TNFRSF12A;PDCD5;PLAUR;HTRA2;BCL10;MFF;TPD52L1;TANK;TGFBR1;CYLD;BCLAF1;BCL2L11;TRIM39;FAM162A;RPS3;BCL2;FAS;RIPK1;DNM1L;BID;PAK2;BOK
establishment of melanosome localization (GO:0032401)	7/18	0.158187	0.873625	0	0	1.50674	2.77839	ARL6;SHROOM2;MYO5A;BBS7;BBS5;RAB11A;BBS4
modulation by virus of host morphology or physiology (GO:0019048)	7/18	0.158187	0.872681	0	0	1.50674	2.77839	RRAGA;SMAD3;KPNA4;KPNA2;KPNA3;KPNB1;KPNA1
positive regulation of extrinsic apoptotic signaling pathway (GO:2001238)	10/28	0.162257	0.894167	0	0	1.38374	2.51643	CYLD;TNFRSF12A;HTRA2;RIPK1;BCL10;INHBA;BID;THBS1;TANK;PAK2
nucleotide-binding oligomerization domain containing signaling pathway (GO:0070423)	10/28	0.162257	0.893202	0	0	1.38374	2.51643	CYLD;ITCH;CASP8;CHUK;UBE2N;TNFAIP3;TAB3;TAB2;IKBKG;RPS27A
primary neural tube formation (GO:0014020)	10/28	0.162257	0.89224	0	0	1.38374	2.51643	TGFB2;STIL;MTHFD1L;MTHFD1;DVL2;COBL;BCL10;GRHL2;BBS4;PHACTR4
cellular response to hydrogen peroxide (GO:0070301)	10/28	0.162257	0.891279	0	0	1.38374	2.51643	SETX;PLEKHA1;RPS3;TNFAIP3;PARK7;ECT2;SIRT1;FXN;MAP3K5;MAPK13
tumor necrosis factor-mediated signaling pathway (GO:0033209)	37/123	0.162684	0.892664	0	0	1.16549	2.11647	PSMD10;PSMD12;PSMD11;PSMD14;TANK;PSMA7;TXNDC17;PSMD9;PSMD6;PSMD7;PSMD5;PSMD2;PSMB1;PSMD1;RIPK1;JAK2;RPS27A;TNFRSF12A;CHUK;TNFRSF10B;PSMA5;PSMA6;PSMA3;PSMC5;PSMA4;PSMC6;KARS;PSMA1;PSMC3;PSMA2;PSMC1;PSME4;PSMC2;PSME1;PSME2;FAS;LIMS1
regulation of protein complex assembly (GO:0043254)	23/73	0.163093	0.893944	0	0	1.22072	2.2137	GSK3B;NAPB;CDT1;HSPA8;HSP90AA1;VCP;DDX3X;WARS;TRAF3IP1;FAF1;HJURP;EIF2AK2;PTPN11;SENP6;LATS1;CDC42;SUMO1;VPS41;RPS3;DNM1L;ANKRA2;FNIP1;FNIP2
negative regulation of apoptotic process (GO:0043066)	135/485	0.163632	0.895937	0	0	1.07846	1.95216	ANKLE2;ARL6IP1;SCX;PARK7;PHB2;IGF1R;RPS6KA3;HMGN5;MYC;BNIP3L;PRKCI;CSNK2A1;UNC5B;EPHA8;OSR1;F2R;LIG4;PRKCA;MSH2;TYRO3;YME1L1;PHIP;EPHA1;SQSTM1;EPHA2;PSMD10;SET;PRKDC;GLO1;PSEN1;MTDH;HSP90B1;PRDX2;PDCD10;FIGNL1;BARD1;HSPA9;FZD3;STIL;TSLP;HSPA5;API5;BDNF;PLK2;RHBDD1;PLK1;TNFRSF10B;ASNS;HMGA2;PA2G4;PTK2;KLHL20;SETX;NR4A2;AHI1;HNRNPK;COPS5;GDNF;IL7;BCL2;CDK1;ITGB1;YWHAE;GSK3B;DDX3X;CITED2;FHL2;KIF14;…
antigen processing and presentation of peptide antigen via MHC class II (GO:0002495)	30/98	0.164836	0.901562	0	0	1.18606	2.13824	DCTN6;DYNC1I2;SEC23A;CLTC;KIF11;KLC1;KIF15;RACGAP1;KIF3B;KIF3A;CTSL;AP1S2;AP1S1;AP1S3;KIF3C;KIFAP3;KIF23;KIF22;AP2B1;DYNLL1;DYNC1LI1;CENPE;DYNC1LI2;KIF18A;KIF2A;CAPZA1;CANX;CAPZA2;KIF2C;ACTR10
negative regulation of Wnt signaling pathway (GO:0030178)	51/174	0.165087	0.901968	0	0	1.13562	2.04557	INVS;GSK3B;CTNND1;CBY1;GLI3;PSMD9;PSMD6;PSMD7;PSMD5;RUVBL2;PSMD2;PSMD1;SCYL2;AXIN1;RBX1;LATS1;PSMA5;PSMA6;PSMA3;PSMA4;PSMA1;SDHAF2;PSMA2;DDIT3;PSME4;PSME1;PSME2;PSMD10;PSMD12;PSMD11;PSMD14;HDAC1;CUL3;KLHL12;MLLT3;PSMA7;STK3;HMGXB4;ZNRF3;PSMB1;DVL2;RPS27A;CSNK1A1;FZD6;CYLD;PSMC5;PSMC6;APC;PSMC3;PSMC1;PSMC2
regulation of establishment of cell polarity (GO:2000114)	6/15	0.166693	0.90977	0	0	1.54979	2.7766	ARFGEF1;RAP1B;ROCK1;ROCK2;KRIT1;KIF20B
regulation of clathrin-dependent endocytosis (GO:2000369)	6/15	0.166693	0.908798	0	0	1.54979	2.7766	ROCK1;WASL;PIK3CB;SMAP1;SCYL2;PICALM
pyrimidine-containing compound metabolic process (GO:0072527)	6/15	0.166693	0.907828	0	0	1.54979	2.7766	DCTD;THTPA;UCK2;ERH;UPRT;DCK
mesenchymal cell development (GO:0014031)	6/15	0.166693	0.90686	0	0	1.54979	2.7766	FOXC1;TCOF1;NOLC1;KLHL12;NRG1;KBTBD8
filopodium assembly (GO:0046847)	6/15	0.166693	0.905895	0	0	1.54979	2.7766	FGD3;FGD4;FGD6;SRGAP2;EZR;FGD1
positive regulation of double-strand break repair (GO:2000781)	6/15	0.166693	0.904931	0	0	1.54979	2.7766	INSL6;KDM4D;DDX11;TIMELESS;FOXM1;PARP9
negative regulation of mRNA processing (GO:0050686)	6/15	0.166693	0.903969	0	0	1.54979	2.7766	BARD1;PTBP1;RNPS1;SRSF7;SRSF10;SRSF12
selective autophagy (GO:0061912)	6/15	0.166693	0.903009	0	0	1.54979	2.7766	BECN1;CALCOCO2;RB1CC1;STBD1;SQSTM1;ATG5
septin ring assembly (GO:0000921)	6/15	0.166693	0.902052	0	0	1.54979	2.7766	SEPT8;SEPT10;ANLN;SEPT11;SEPT7;SEPT2
transport along microtubule (GO:0010970)	6/15	0.166693	0.901096	0	0	1.54979	2.7766	CDC42;HSPA8;DYNC1I2;ARHGAP21;COPG2;DYNLL1
regulation of protein catabolic process (GO:0042176)	28/91	0.167189	0.902822	0	0	1.19214	2.1323	GSK3B;VCP;CDKN1B;SF3B3;FAF1;ODC1;SNX12;TNFAIP3;IDE;CHEK2;FAM83D;BARD1;CSNK2A1;SMURF2;TIPARP;PLK2;AXIN1;SNF8;AZIN1;EEF1A1;DDB1;ITCH;APC;NEDD4;MDM2;SEC22B;DTL;MAD2L1
vesicle organization (GO:0016050)	38/127	0.168021	0.906357	0	0	1.15929	2.06778	PI4K2B;STX12;STX17;SNX12;SNX10;WASL;FNBP1L;RAB22A;EEA1;SNX4;SNX1;SNX2;SNX9;STX3;SNAP29;EPS15;SNX5;S100A10;SNX6;USP8;SYT4;STX8;AKTIP;STX7;DNAJC13;HOOK3;SYT13;SYT8;ZFYVE16;VAMP7;HOOK2;ALS2;HOOK1;CHMP2B;VAMP4;SEC22B;SQSTM1;PICALM
regulation of microtubule polymerization (GO:0031113)	12/35	0.16917	0.911587	0	0	1.32839	2.36035	PAK1;CLIP1;NAV3;STMN1;AKAP9;RPS3;SLAIN2;MAPRE1;MET;CAMSAP1;CLASP1;CDK5RAP2
actin filament bundle organization (GO:0061572)	12/35	0.16917	0.910626	0	0	1.32839	2.36035	EPS8;MYO1B;BAIAP2L1;PLS3;PAWR;RHOC;EZR;RND3;RHOD;RHOA;RND1;PLS1
erythrocyte differentiation (GO:0030218)	12/35	0.16917	0.909666	0	0	1.32839	2.36035	HSPA9;RPS14;MBD4;DYRK3;RPS19;CASP3;CEBPG;ATPIF1;INHBA;JAK2;LYAR;PTPN2
regulation of protein import into nucleus (GO:0042306)	9/25	0.173048	0.929539	0	0	1.39481	2.44676	MDFIC;GNAQ;TPR;CHORDC1;EFCAB7;ECT2;SIRT1;IPO5;RBM22
regulation of viral genome replication (GO:0045069)	20/63	0.174209	0.934791	0	0	1.22999	2.14941	TOP2A;SRPK2;DDX3X;STAU1;EIF2AK2;ISG15;SRPK1;DDB1;FAM111A;ILF3;PLSCR1;LARP1;CNOT7;PPIE;BANF1;PPIH;PKN2;PABPC1;PPIA;PPID
RNA methylation (GO:0001510)	16/49	0.174476	0.935241	0	0	1.26513	2.20888	WTAP;DIMT1;NSUN2;NOP2;THUMPD3;NSUN6;TFB2M;THADA;TFB1M;ALKBH8;FTSJ3;TARBP1;FBL;METTL14;TGS1;TRMT6
peptidyl-arginine modification (GO:0018195)	5/12	0.17475	0.935731	0	0	1.61436	2.81609	PRMT5;PRMT7;PRMT1;PARK7;PADI4
regulation of DNA-dependent DNA replication (GO:0090329)	5/12	0.17475	0.93475	0	0	1.61436	2.81609	CDT1;BLM;TIPIN;ARTN;GMNN
vesicle budding from membrane (GO:0006900)	5/12	0.17475	0.933771	0	0	1.61436	2.81609	GOLPH3L;MYO18A;WASL;FNBP1L;S100A10
viral RNA genome replication (GO:0039694)	5/12	0.17475	0.932795	0	0	1.61436	2.81609	CDC42;EEA1;ROCK2;PCBP2;RAB5A
cellular response to arsenic-containing substance (GO:0071243)	5/12	0.17475	0.93182	0	0	1.61436	2.81609	DDX3X;GSTO1;HNRNPA1;ATF3;MAPK13
mitochondrion transport along microtubule (GO:0047497)	5/12	0.17475	0.930847	0	0	1.61436	2.81609	RHOT1;SPAST;OPA1;HIF1A;LRPPRC
somatic hypermutation of immunoglobulin genes (GO:0016446)	5/12	0.17475	0.929877	0	0	1.61436	2.81609	MSH6;MSH2;PMS2;POLK;MLH1
negative regulation of DNA damage response, signal transduction by p53 class mediator (GO:0043518)	5/12	0.17475	0.928908	0	0	1.61436	2.81609	PSMD10;KDM1A;MDM2;SIRT1;CD44
pyrimidine deoxyribonucleotide catabolic process (GO:0009223)	5/12	0.17475	0.927941	0	0	1.61436	2.81609	MBD4;DUT;TDG;DCTPP1;UNG
regulation of viral life cycle (GO:1903900)	5/12	0.17475	0.926977	0	0	1.61436	2.81609	TSG101;VPS4B;TRIM25;SNF8;PPIA
negative regulation of ERAD pathway (GO:1904293)	5/12	0.17475	0.926014	0	0	1.61436	2.81609	USP25;USP14;UBXN1;DERL2;UBE2J1
mitochondrial outer membrane permeabilization (GO:0097345)	5/12	0.17475	0.925054	0	0	1.61436	2.81609	BNIP3L;MOAP1;RHOT1;BCL2L11;BLOC1S2
entry of bacterium into host cell (GO:0035635)	5/12	0.17475	0.924095	0	0	1.61436	2.81609	CDH1;CTNND1;CTNNB1;RPS27A;MET
negative regulation of cell death (GO:0060548)	25/81	0.179295	0.947145	0	0	1.19582	2.05529	GSK3B;BECN1;VPS4B;AMIGO2;HTRA2;TXNDC12;PARK7;TM7SF3;TANK;CYR61;WISP1;CTGF;MECOM;GPNMB;VPS35;IKBKG;DCPS;NCK1;ATG5;BNIP3L;POU4F1;PSMC5;CHMP2A;CTNNB1;RAD18
endodermal cell differentiation (GO:0035987)	11/32	0.180743	0.953806	0	0	1.33185	2.27837	SETD2;COL7A1;CTR9;LEO1;HMGA2;COL8A1;ITGAV;LAMB1;RTF1;INHBA;CDC73
purine ribonucleoside triphosphate metabolic process (GO:0009205)	11/32	0.180743	0.952821	0	0	1.33185	2.27837	HSPA8;OPA1;RAB23;FIGNL1;OLA1;GNAI3;MFN1;AK4;NDUFS1;CLPX;RAN
homocysteine metabolic process (GO:0050667)	4/9	0.181139	0.953923	0	0	1.72199	2.942	MTRR;CTH;BLMH;MUT
protein polyglutamylation (GO:0018095)	4/9	0.181139	0.952939	0	0	1.72199	2.942	TTLL7;TTLL6;TTLL5;TTLL4
cellular response to oxygen levels (GO:0071453)	4/9	0.181139	0.951958	0	0	1.72199	2.942	ATP6V1A;TMEM199;ATP6V1G1;PICK1
regulation of methylation-dependent chromatin silencing (GO:0090308)	4/9	0.181139	0.950978	0	0	1.72199	2.942	DNMT1;SETDB1;UHRF2;UHRF1
mitral valve morphogenesis (GO:0003183)	4/9	0.181139	0.950001	0	0	1.72199	2.942	ACVR1;EFNA1;BMPR2;BMPR1A
axonal transport of mitochondrion (GO:0019896)	4/9	0.181139	0.949026	0	0	1.72199	2.942	SPAST;OPA1;HAP1;HIF1A
mesodermal cell differentiation (GO:0048333)	4/9	0.181139	0.948052	0	0	1.72199	2.942	ITGB1;ITGA3;ITGA2;HMGA2
regulation of nephron tubule epithelial cell differentiation (GO:0072182)	4/9	0.181139	0.947081	0	0	1.72199	2.942	PAX8;OSR1;LIF;CTNNB1
establishment of epithelial cell apical/basal polarity (GO:0045198)	4/9	0.181139	0.946112	0	0	1.72199	2.942	CDC42;MSN;MYO9A;RHOA
histone phosphorylation (GO:0016572)	4/9	0.181139	0.945144	0	0	1.72199	2.942	CCNA2;RPS6KA5;CDK2;BAZ1B
Golgi inheritance (GO:0048313)	4/9	0.181139	0.944179	0	0	1.72199	2.942	PDCD10;CDK1;VRK1;YWHAZ
negative regulation of peptidyl-lysine acetylation (GO:2000757)	4/9	0.181139	0.943215	0	0	1.72199	2.942	SET;TAF7;BRCA1;SIRT1
positive regulation of transcription of nuclear large rRNA transcript from RNA polymerase I promoter (GO:1901838)	4/9	0.181139	0.942254	0	0	1.72199	2.942	NCL;MARS;DDX11;NOL11
RNA destabilization (GO:0050779)	4/9	0.181139	0.941294	0	0	1.72199	2.942	METTL14;YTHDF2;YTHDF3;GIGYF2
regulation of organ growth (GO:0046620)	4/9	0.181139	0.940337	0	0	1.72199	2.942	LATS1;WWC1;WWC2;PTEN
actin crosslink formation (GO:0051764)	4/9	0.181139	0.939381	0	0	1.72199	2.942	EPS8;BAIAP2L1;PLS3;PLS1
regulation of cysteine-type endopeptidase activity involved in apoptotic signaling pathway (GO:2001267)	4/9	0.181139	0.938427	0	0	1.72199	2.942	PLAUR;FAS;HTRA2;PARK7
negative regulation of mRNA 3'-end processing (GO:0031441)	4/9	0.181139	0.937476	0	0	1.72199	2.942	BARD1;RNF20;CTR9;ZC3H14
regulation of histone H3-K27 methylation (GO:0061085)	3/6	0.182423	0.943166	0	0	1.93723	3.29606	MTF2;SUPT6H;PHF19
negative regulation of chromosome organization (GO:2001251)	3/6	0.182423	0.942212	0	0	1.93723	3.29606	TOP2A;ERCC1;TERF2
embryonic skeletal joint development (GO:0072498)	3/6	0.182423	0.941259	0	0	1.93723	3.29606	COL2A1;OSR1;AXIN1
positive regulation of aspartic-type peptidase activity (GO:1905247)	3/6	0.182423	0.940308	0	0	1.93723	3.29606	EFNA1;ROCK2;PICALM
SRP-dependent cotranslational protein targeting to membrane, translocation (GO:0006616)	3/6	0.182423	0.939359	0	0	1.93723	3.29606	SRP19;SRP72;SRP9
viral release from host cell (GO:0019076)	3/6	0.182423	0.938413	0	0	1.93723	3.29606	VPS4B;PPIA;PPID
peripheral nervous system neuron development (GO:0048935)	3/6	0.182423	0.937467	0	0	1.93723	3.29606	ISL2;ETV1;POU4F1
negative regulation of stress-activated protein kinase signaling cascade (GO:0070303)	3/6	0.182423	0.936524	0	0	1.93723	3.29606	IGBP1;MYC;FOXM1
response to DNA damage checkpoint signaling (GO:0072423)	3/6	0.182423	0.935583	0	0	1.93723	3.29606	EME1;APAF1;SMC1A
rRNA transport (GO:0051029)	3/6	0.182423	0.934644	0	0	1.93723	3.29606	NPM1;PNPT1;MRPL18
exit from host cell (GO:0035891)	3/6	0.182423	0.933706	0	0	1.93723	3.29606	VPS4B;PPIA;PPID
regulation of wound healing, spreading of epidermal cells (GO:1903689)	3/6	0.182423	0.932771	0	0	1.93723	3.29606	PTEN;PHLDB2;CLASP1
regulation of epithelial to mesenchymal transition involved in endocardial cushion formation (GO:1905005)	3/6	0.182423	0.931837	0	0	1.93723	3.29606	ACVR1;TGFB2;TGFBR1
queuosine metabolic process (GO:0046116)	3/6	0.182423	0.930905	0	0	1.93723	3.29606	PDCL3;TXNDC9;PDCL
transcription initiation from RNA polymerase III promoter (GO:0006384)	3/6	0.182423	0.929975	0	0	1.93723	3.29606	GTF3C4;CRCP;BDP1
regulation of ribonucleoprotein complex localization (GO:2000197)	3/6	0.182423	0.929047	0	0	1.93723	3.29606	SETD2;SUPT6H;IWS1
negative regulation of cell size (GO:0045792)	3/6	0.182423	0.928121	0	0	1.93723	3.29606	RDX;PTEN;RHOA
lens fiber cell development (GO:0070307)	3/6	0.182423	0.927196	0	0	1.93723	3.29606	WNT7B;WNT7A;EPHA2
pronephros development (GO:0048793)	3/6	0.182423	0.926274	0	0	1.93723	3.29606	PAX8;OSR1;CEP290
interphase microtubule nucleation by interphase microtubule organizing center (GO:0051415)	3/6	0.182423	0.925353	0	0	1.93723	3.29606	TUBGCP5;TUBGCP3;MZT1
regulation of interferon-alpha secretion (GO:1902739)	3/6	0.182423	0.924434	0	0	1.93723	3.29606	CHUK;DHX9;DHX36
regulation of response to wounding (GO:1903034)	3/6	0.182423	0.923517	0	0	1.93723	3.29606	STK24;TNFRSF12A;PLAU
corticosteroid receptor signaling pathway (GO:0031958)	3/6	0.182423	0.922602	0	0	1.93723	3.29606	NEDD4;CALR;YWHAH
regulation of mitotic spindle checkpoint (GO:1903504)	3/6	0.182423	0.921688	0	0	1.93723	3.29606	CCNB1;USP44;CDK5RAP2
regulation of transforming growth factor beta2 production (GO:0032909)	3/6	0.182423	0.920777	0	0	1.93723	3.29606	TGFB2;SMAD3;HIF1A
ribonucleoside biosynthetic process (GO:0042455)	3/6	0.182423	0.919867	0	0	1.93723	3.29606	PDCL3;TXNDC9;PDCL
plus-end-directed organelle transport along microtubule (GO:0072386)	3/6	0.182423	0.918959	0	0	1.93723	3.29606	KIF3B;KIF3A;KIFAP3
ventricular compact myocardium morphogenesis (GO:0003223)	3/6	0.182423	0.918052	0	0	1.93723	3.29606	DSP;TGFBR1;BMPR1A
positive regulation of clathrin-dependent endocytosis (GO:2000370)	3/6	0.182423	0.917148	0	0	1.93723	3.29606	WASL;SCYL2;PICALM
positive regulation of interferon-alpha secretion (GO:1902741)	3/6	0.182423	0.916245	0	0	1.93723	3.29606	CHUK;DHX9;DHX36
negative regulation of DNA repair (GO:0045738)	3/6	0.182423	0.915344	0	0	1.93723	3.29606	UBR5;RPS3;TRIP12
queuosine biosynthetic process (GO:0008616)	3/6	0.182423	0.914445	0	0	1.93723	3.29606	PDCL3;TXNDC9;PDCL
endosome to lysosome transport via multivesicular body sorting pathway (GO:0032510)	3/6	0.182423	0.913548	0	0	1.93723	3.29606	VCP;VPS4B;CHMP2B
regulation of mRNA export from nucleus (GO:0010793)	3/6	0.182423	0.912652	0	0	1.93723	3.29606	SETD2;SUPT6H;IWS1
positive regulation of fibroblast apoptotic process (GO:2000271)	3/6	0.182423	0.911758	0	0	1.93723	3.29606	BCL2L11;BTG1;STK17B
glucocorticoid receptor signaling pathway (GO:0042921)	3/6	0.182423	0.910866	0	0	1.93723	3.29606	NEDD4;CALR;YWHAH
endoplasmic reticulum membrane organization (GO:0090158)	3/6	0.182423	0.909976	0	0	1.93723	3.29606	ARL6IP1;ATL2;RTN4
positive regulation of aspartic-type endopeptidase activity involved in amyloid precursor protein catabolic process (GO:1902961)	3/6	0.182423	0.909087	0	0	1.93723	3.29606	EFNA1;ROCK2;PICALM
positive regulation of protein glycosylation (GO:0060050)	3/6	0.182423	0.9082	0	0	1.93723	3.29606	ARFGEF1;CHORDC1;ALG10B
regulation of fat cell proliferation (GO:0070344)	3/6	0.182423	0.907315	0	0	1.93723	3.29606	TFDP1;E2F1;E2F3
polyamine biosynthetic process (GO:0006596)	3/6	0.182423	0.906432	0	0	1.93723	3.29606	SMOX;SMS;SAT1
regulation of non-motile cilium assembly (GO:1902855)	3/6	0.182423	0.90555	0	0	1.93723	3.29606	CEP135;SEPT7;HAP1
SCF complex assembly (GO:0010265)	3/6	0.182423	0.90467	0	0	1.93723	3.29606	CAND1;CUL1;RBX1
regulation of translational initiation in response to stress (GO:0043558)	3/6	0.182423	0.903791	0	0	1.93723	3.29606	PPP1R15A;EIF2S1;ATF4
snRNA modification (GO:0040031)	3/6	0.182423	0.902915	0	0	1.93723	3.29606	MRPL1;DKC1;NHP2
positive regulation of extrinsic apoptotic signaling pathway via death domain receptors (GO:1902043)	3/6	0.182423	0.90204	0	0	1.93723	3.29606	PTEN;THBS1;ATF3
nucleobase metabolic process (GO:0009112)	3/6	0.182423	0.901167	0	0	1.93723	3.29606	PRPS1;UCK2;UPRT
cellular protein modification process (GO:0006464)	271/1001	0.183832	0.907246	0	0	1.04893	1.77661	GMFB;CCNF;DMP1;PPP2R2A;PSMD9;RPS6KA3;PSMD6;NUB1;RPS6KA6;PSMD7;PPP4R1;TBK1;LGALS1;RPS6KA5;PPP4R2;PSMD5;PSMD2;OGFOD1;CHEK2;AKT3;CHEK1;PSMD1;SEPHS1;SKP2;PRKACB;ACVR1;PRKCI;WSB1;CSNK2A1;FBXO2;ALG5;COG3;CSNK1D;PRKCA;PASK;PSME4;PSME1;PSME2;PADI4;ALG10B;LIPT1;MTMR2;PRKDC;SDC2;FUT10;DCUN1D1;HIF1A;NUAK1;ST3GAL4;STK38L;ATG5;CDK17;PLK4;SRPK2;CDK19;YES1;PLK2;FUCA2;PLK1;EIF2AK2;WDYHV1;CP;SRPK1;CALU;ATM;CDK12;…
regulation of proteasomal protein catabolic process (GO:0061136)	13/39	0.184554	0.90993	0	0	1.29149	2.18238	USP14;GABARAPL2;TMF1;PSMD14;FBXW7;FMR1;GLMN;TMTC3;COMMD1;RAD23B;UCHL5;PSME1;PSME2
ERBB2 signaling pathway (GO:0038128)	13/39	0.184554	0.909052	0	0	1.29149	2.18238	HSP90AA1;CUL5;NRG1;PRKCA;PTPN12;NRAS;PIK3CA;CDC37;CPNE3;KRAS;RPS27A;SOS1;HBEGF
regulation of plasma membrane bounded cell projection assembly (GO:0120032)	13/39	0.184554	0.908175	0	0	1.29149	2.18238	FMR1;RDX;TWF1;CDC42;DYNC2LI1;CYLD;SH3YL1;IFT88;FER;TCTEX1D2;RAB5A;ATG5;EPHA2
Golgi to plasma membrane transport (GO:0006893)	13/39	0.184554	0.9073	0	0	1.29149	2.18238	GOLPH3L;COMMD1;RAB10;GOLGA4;RAB31;EXOC4;GOPC;EXOC5;GOLGA7;STEAP2;BLZF1;OPTN;EXOC1
regulation of DNA biosynthetic process (GO:2000278)	8/22	0.184782	0.907548	0	0	1.4089	2.37903	BMPR2;PARP4;TNKS;MYC;PINX1;ANKRD1;ATM;TERF2
DNA catabolic process, endonucleolytic (GO:0000737)	8/22	0.184782	0.906675	0	0	1.4089	2.37903	H1F0;CASP3;HMGB2;DICER1;HMGB1;EXOG;KPNB1;KPNA1
negative regulation of myeloid cell differentiation (GO:0045638)	8/22	0.184782	0.905804	0	0	1.4089	2.37903	HSPA9;CDK6;PRMT1;CTR9;LEO1;WDR61;CDC73;HOXA5
histone lysine methylation (GO:0034968)	8/22	0.184782	0.904935	0	0	1.4089	2.37903	SETD3;RBBP5;SETD6;SETDB2;WDR5;DPY30;ASH2L;EZH2
viral genome replication (GO:0019079)	8/22	0.184782	0.904067	0	0	1.4089	2.37903	CDC42;EEA1;VCP;ROCK2;PCBP2;DEK;HTATSF1;RAB5A
positive regulation of proteolysis involved in cellular protein catabolic process (GO:1903052)	8/22	0.184782	0.903201	0	0	1.4089	2.37903	RNF139;FBXW7;FMR1;ATPIF1;TMTC3;AXIN1;PTEN;PTK2
positive regulation of protein binding (GO:0032092)	19/60	0.185187	0.904317	0	0	1.22691	2.06905	GSK3B;CSF3;BDNF;USP33;AKTIP;RPL11;NMD3;PARK7;PSEN1;TANK;TIRAP;STK3;FKBP1A;TIAM1;PPP2CB;GNL3L;TRIB3;RAN;TAF1
Golgi organization (GO:0007030)	36/121	0.185827	0.906572	0	0	1.15273	1.93998	USP6NL;PI4K2B;STX17;ATL3;UBXN2A;ATL2;ARL1;GCC2;CDC42;ARHGAP21;LMAN1;GOLGA5;BAG5;PDCD10;MYO18A;TMED7;TMED5;CLASP1;DYNC2H1;ARFGEF1;PRMT5;TMED9;HACE1;CSNK1A1;COG3;GOLPH3L;VRK1;CSNK1D;TRAPPC8;YWHAZ;NSFL1C;GOLGB1;CDK1;VAMP4;OPTN;BLZF1
regulation of cellular component movement (GO:0051270)	15/46	0.186056	0.906825	0	0	1.26341	2.12469	IGBP1;ROCK1;ROCK2;ACTN1;ARHGAP18;NRG1;MEMO1;RHOA;TGFBR1;CDK6;RPS19;INPP5F;ABL2;PKN2;HBEGF
protein methylation (GO:0006479)	15/46	0.186056	0.905959	0	0	1.26341	2.12469	HSPA8;PRMT5;VCP;PRMT7;PRMT1;GSPT1;EEF1A1;PCMT1;KIN;ETF1;FAM98B;SNRPD3;RPS2;FAM98A;EZH2
positive regulation of programmed cell death (GO:0043068)	73/257	0.187404	0.911651	0	0	1.10053	1.84283	TOP2A;ITGB1;DDX3X;FAF1;PDCD5;HMGB1;UBE2Z;IFIT2;ING5;ING3;AIFM1;FAM162A;ANKRD1;DNM1L;HOXA5;MAP3K5;BOK;UNC13B;VAV3;BNIP3L;TNFRSF12A;APAF1;RPS6;ARHGEF16;PAWR;SIRT1;TIAM2;LATS1;TIAM1;MELK;SHQ1;ITGA6;ARHGEF2;EEF1E1;SOS1;ATF6;SQSTM1;SOS2;ARHGEF5;PPID;ITGB3BP;ATF4;USP27X;DDX20;HTRA2;BCL10;PSEN1;FGD1;STK3;HSPD1;FGD3;FGD4;BCLAF1;BCL2L11;E2F1;RIPK1;RPS27A;BID;ECT2;BARD1;MOAP1;GADD45B;GADD45A;HMGA2;RRP1B;DN…
regulation of keratinocyte differentiation (GO:0045616)	10/29	0.193428	0.940061	0	0	1.33602	2.19488	ERRFI1;CYP27B1;MBD4;FOXC1;ROCK1;CBFB;ROCK2;CTSL;NME2;GRHL2
tube closure (GO:0060606)	10/29	0.193428	0.939166	0	0	1.33602	2.19488	TGFB2;STIL;MTHFD1L;MTHFD1;DVL2;COBL;BCL10;GRHL2;BBS4;PHACTR4
cellular response to starvation (GO:0009267)	32/107	0.193541	0.938821	0	0	1.15872	1.90292	BECN1;PRKAA1;SEH1L;BMPR2;USP33;RRP8;WRN;LARS;LAMP2;MAPK1;FNIP1;HNRNPA1;MAP3K5;ATG5;SH3GLB1;GABARAPL2;HSPA8;HSPA5;MIOS;EIF2AK2;ASNS;EIF2S1;SIRT1;RRAGA;RRAGC;STK24;MYBBP1A;MARS;PICK1;FAS;PIK3C3;ATF4
mRNA catabolic process (GO:0006402)	12/36	0.197364	0.956457	0	0	1.29149	2.09571	SUPV3L1;DDX5;EXOSC10;PNPT1;XRN1;DIS3;THRAP3;EXOSC9;MRTO4;RC3H1;LSM5;DCP2
histone deacetylation (GO:0016575)	12/36	0.197364	0.95555	0	0	1.29149	2.09571	MORF4L1;HDAC2;HDAC1;TBL1XR1;MORF4L2;BRMS1L;MIER1;SMARCAD1;MSL3;TBL1X;SIRT1;RCOR1
regulation of cellular component organization (GO:0051128)	41/140	0.197483	0.95522	0	0	1.13467	1.84054	OGFR;CAMK2D;HJURP;KIF14;STON1;SNX12;PARK7;TMEM97;EFNA5;CAMSAP1;RAP1B;RAB21;ZMYM1;BAG5;RAP1A;ZMYM2;ZMYM4;ZMYM6;PACSIN2;STK38L;ABL2;PDZD8;SH3D19;HSPA8;HSP90AA1;PTPN11;LARP4;CDK11B;LATS1;ITCH;ZFYVE16;FMNL2;NEDD4;RUFY2;PHIP;SGK3;ANKRA2;RAB5A;EBAG9;BLZF1;PICALM
vesicle transport along microtubule (GO:0047496)	7/19	0.197574	0.954752	0	0	1.42744	2.31479	KIF3B;KIF3A;NDE1;KIF5B;HAP1;KIFAP3;PAFAH1B1
endothelial cell development (GO:0001885)	7/19	0.197574	0.953849	0	0	1.42744	2.31479	RAP1B;RAP1A;MARVELD2;RDX;MSN;EZR;MET
Rac protein signal transduction (GO:0016601)	7/19	0.197574	0.952947	0	0	1.42744	2.31479	EPS8;CYFIP1;NCKAP1;TIAM1;HACE1;ABI2;WASF1
positive regulation of oxidoreductase activity (GO:0051353)	7/19	0.197574	0.952048	0	0	1.42744	2.31479	CYP27B1;EDN1;GDNF;COX17;ABL2;PARK7;FXN
nucleosome disassembly (GO:0006337)	7/19	0.197574	0.951149	0	0	1.42744	2.31479	SMARCE1;SMARCC1;SUPT16H;PBRM1;SET;GRWD1;HMGA1
chromatin disassembly (GO:0031498)	7/19	0.197574	0.950253	0	0	1.42744	2.31479	SMARCE1;SMARCC1;SUPT16H;PBRM1;SET;GRWD1;HMGA1
extrinsic apoptotic signaling pathway in absence of ligand (GO:0097192)	7/19	0.197574	0.949358	0	0	1.42744	2.31479	GSK3B;MOAP1;CASP3;BCL2;ITGAV;BOK;APPL1
protein heterotetramerization (GO:0051290)	7/19	0.197574	0.948465	0	0	1.42744	2.31479	CPSF7;XRCC6;CPSF6;RCC1;FARSA;FARSB;S100A10
positive regulation of neuron apoptotic process (GO:0043525)	7/19	0.197574	0.947574	0	0	1.42744	2.31479	SRPK2;PRNP;TGFB2;FBXW7;DDIT3;CTNNB1;ATF4
transmembrane receptor protein tyrosine kinase signaling pathway (GO:0007169)	110/396	0.198098	0.949195	0	0	1.07624	1.74243	CYFIP1;NCKAP1;CSF1;ACTG1;IGF1R;BAIAP2L1;STMN1;ATP6V1G1;EPHA8;CD3EAP;FRS2;GTF2F1;GTF2F2;TIAM1;KIF16B;PHIP;EPHA1;EPHA2;ATP6V1A;SDC2;PSEN1;EFNA5;GIGYF2;EFNB2;SDCBP;FLRT3;FLRT1;PDGFC;ABL2;ATP6V1H;ATP6V1D;ATP6V1C1;NUS1;TIA1;YES1;BDNF;PTK2;SETX;FGF17;EFNA1;HNRNPM;AHI1;FER;ARPC3;HNRNPF;CEP57;TRIM71;BMPR2;PIK3CB;IDE;WASL;PIK3C2A;PTBP1;SPRED1;CASP3;BDKRB2;ITGAV;AP3S1;JAK2;APPL1;NCK1;ACTR3;VAV3;ACTR2;FGFBP…
nucleobase-containing compound catabolic process (GO:0034655)	14/43	0.198655	0.950974	0	0	1.26145	2.03874	RNASEH2B;RNASEH2A;PNPT1;DIS3;PABPC4;NUDT1;NUDT5;EXOSC7;SUPV3L1;TATDN1;PPP1R8;XRN2;HNRNPD;SKIV2L2
RNA catabolic process (GO:0006401)	14/43	0.198655	0.950083	0	0	1.26145	2.03874	FEN1;RNASEH2B;RNASEH2A;PNPT1;DIS3;PABPC4;EXOSC7;SUPV3L1;PPP1R8;XRN2;HNRNPD;DNA2;DCP2;SKIV2L2
protein transmembrane import into intracellular organelle (GO:0044743)	14/43	0.198655	0.949193	0	0	1.26145	2.03874	HSP90AA1;HSPA4;TIMM9;TIMM22;TOMM20;HSPD1;TOMM22;CHCHD4;SAMM50;GRPEL1;GRPEL2;TIMM17A;TOMM7;RAB8B
regulation of actin cytoskeleton organization (GO:0032956)	23/75	0.201175	0.960334	0	0	1.18817	1.90532	ROCK1;ROCK2;RDX;RHOBTB3;TWF1;ARHGAP18;SEMA3E;F11R;RHOC;EFNA5;RND3;RHOD;RHOA;RND1;EPS8;CDC42;CCDC88A;TAOK1;ABL2;RHOU;RICTOR;CRK;ARHGEF5
endosomal transport (GO:0016197)	65/229	0.205147	0.978377	0	0	1.09974	1.74202	VPS29;DENND1B;ZFYVE9;CLTC;DPY30;GCC2;PTPN23;EEA1;VPS35;VPS36;SCYL2;STX8;AKTIP;VPS13A;VPS37A;ARL4C;ZFYVE16;VAMP7;KIF16B;CHMP4C;PIK3C3;TBC1D23;SQSTM1;STAM2;CHMP5;TMEM87A;BECN1;TSG101;VPS4B;ARL1;RHOBTB3;VPS26A;MTM1;SNX4;SNX1;SNX2;HMGXB4;SNX27;MICALL2;VPS54;SNX9;RPS27A;EPS15;ANKRD50;RAB6B;EVI5;SNX5;SNX6;SPAG9;ANKRD27;SNF8;STAM;HOOK3;KLHL20;RAB10;SNX16;HOOK2;HOOK1;RAB12;ALMS1;CHMP2B;VPS41;CHMP2A;RAB5A…
peptidyl-serine modification (GO:0018209)	49/170	0.206547	0.984134	0	0	1.11676	1.76138	GSK3B;RPS6KA3;TBK1;CHEK2;AKT3;TLK2;PDK3;CSNK1G3;MORC3;PRKCI;CHUK;PARP1;PARP2;VRK1;CSNK1D;PRKCA;VRK2;MASTL;TGFBR1;LATS1;SGK3;TOP1;CSNK1G1;CAMK2D;PRKDC;TNKS;ROCK2;STK39;TTBK2;STK38L;MAPK1;RICTOR;CLSPN;PAK2;GALNT7;GALNT4;GALNT3;CSNK1A1;PLK2;GALNT1;PLK1;CDC7;MAPK13;CDK2;CDK1;ATM;PKN2;ATR;TAF1
protein targeting to mitochondrion (GO:0006626)	17/54	0.209809	0.998743	0	0	1.21974	1.9047	HSP90AA1;HSPA4;TIMM9;TIMM22;MFF;TOMM20;TOMM22;HSPD1;CHCHD4;IMMP1L;SAMM50;PITRM1;GRPEL1;GRPEL2;TIMM17A;TOMM7;TOMM5
cellular response to glucose starvation (GO:0042149)	11/33	0.211432	1	0	0	1.29149	2.00678	SH3GLB1;BECN1;PRKAA1;HSPA5;MYBBP1A;ASNS;PICK1;PIK3C3;HNRNPA1;RRP8;ATF4
protein transport along microtubule (GO:0098840)	6/16	0.211543	1	0	0	1.45293	2.25687	TTC26;IFT74;TRAF3IP1;IFT81;IFT46;IFT57
regulation of cell cycle phase transition (GO:1901987)	6/16	0.211543	1	0	0	1.45293	2.25687	DDB1;FBXW7;PLK1;XPC;GTSE1;TAF1
regulation of bicellular tight junction assembly (GO:2000810)	6/16	0.211543	1	0	0	1.45293	2.25687	TJP1;OCLN;ROCK1;CBFB;ROCK2;NPHP1
regulation of stem cell proliferation (GO:0072091)	6/16	0.211543	1	0	0	1.45293	2.25687	YAP1;EPCAM;HMGB2;EIF2AK2;HNRNPU;HMGA2
positive regulation of response to endoplasmic reticulum stress (GO:1905898)	6/16	0.211543	1	0	0	1.45293	2.25687	PPP1R15A;ATXN3;BCL2L11;DDIT3;BOK;NCK1
negative regulation of NF-kappaB import into nucleus (GO:0042347)	6/16	0.211543	1	0	0	1.45293	2.25687	PSMD10;PPM1A;CYLD;PPM1B;FAF1;G3BP2
activation of NF-kappaB-inducing kinase activity (GO:0007250)	6/16	0.211543	0.999541	0	0	1.45293	2.25687	CARD10;TNFRSF10B;ZFP91;TANK;TIRAP;TLR3
guanosine-containing compound metabolic process (GO:1901068)	6/16	0.211543	0.998617	0	0	1.45293	2.25687	OPA1;RAB23;GNAI3;MFN1;AK4;RAN
negative regulation of I-kappaB kinase/NF-kappaB signaling (GO:0043124)	15/47	0.211641	0.998156	0	0	1.23653	1.92017	PSMD10;USP10;FAF1;OTUD7B;TNFAIP3;TANK;SIRT1;PPM1A;CYLD;PPM1B;CASP8;G3BP2;RIPK1;TRIM59;ZMYND11
androgen receptor signaling pathway (GO:0030521)	13/40	0.212411	1	0	0	1.2592	1.9508	MBD4;KDM3A;DDX5;NCOA4;FHL2;BRCA1;MED4;MED17;MED13;THRAP3;NRIP1;CTNNB1;RAN
regulation of protein dephosphorylation (GO:0035304)	13/40	0.212411	0.999937	0	0	1.2592	1.9508	PPP1R15A;ANKLE2;PPP1R14B;CDCA2;PPP1R11;YWHAB;ARPP19;HSP90B1;PPP1R7;ENSA;PPP1R8;TIPRL;CALM2
cell-cell junction organization (GO:0045216)	22/72	0.213259	1	0	0	1.18386	1.82936	DSP;PRKCI;TGFB2;CXADR;SMAD3;CTNND1;F2R;PVR;GJC1;TJP1;PARD6B;OCLN;MARVELD2;CDH1;CDH10;PERP;TRPV4;MARVELD3;CTNNA1;CDH24;DSG2;RAB8B
regulation of cell division (GO:0051302)	20/65	0.217014	1	0	0	1.19214	1.82135	SH3GLB1;BECN1;AHCTF1;SETD2;BLM;CETN2;PLK1;PRPF40A;AURKB;RAB11A;AURKA;ORC6;KIF18B;PRC1;CSPP1;MYC;PIK3C3;KIF20A;CALM2;BBS4
chromatin assembly (GO:0031497)	20/65	0.217014	1	0	0	1.19214	1.82135	BRD2;NPM1;ATRX;H3F3A;HMGB2;SMARCA5;HMGA2;RSF1;CTCF;SPTY2D1;CENPA;CHAF1B;CHAF1A;SART3;RBBP4;GRWD1;ANP32E;PADI4;ANP32B;ASF1A
negative regulation of extrinsic apoptotic signaling pathway (GO:2001237)	23/76	0.221716	1	0	0	1.17254	1.76626	ACVR1;CSF2;EYA1;UNC5B;TNFAIP3;TNFRSF10B;PARK7;BRCA1;TANK;THBS1;SH3RF1;TGFBR1;IL1A;CASP8;GDNF;BCL2;FAS;ITGAV;ITGA6;PHIP;RIPK1;ARHGEF2;ZMYND11
metanephros development (GO:0001656)	8/23	0.222922	1	0	0	1.34764	2.02272	NIPBL;PAX8;GDNF;SIX4;BASP1;OSR1;WNT7B;PKD2
histone H3-K4 methylation (GO:0051568)	8/23	0.222922	1	0	0	1.34764	2.02272	SETD3;RBBP5;CTR9;WDR5;BEND3;DPY30;ASH2L;WDR61
regulation of cell size (GO:0008361)	8/23	0.222922	1	0	0	1.34764	2.02272	VAV3;MTPN;EDN1;LARS;RDX;PTEN;MSN;RHOA
viral budding (GO:0046755)	8/23	0.222922	1	0	0	1.34764	2.02272	TSG101;VPS4B;CHMP1B;CHMP2B;CHMP4C;CHMP2A;VPS37A;CHMP5
TOR signaling (GO:0031929)	8/23	0.222922	1	0	0	1.34764	2.02272	CCDC88A;LARP1;RPS6KB1;MAPKAP1;RPS6;TIPRL;RHEBL1;FNIP1
negative regulation of cellular macromolecule biosynthetic process (GO:2000113)	140/512	0.224925	1	0	0	1.05942	1.58065	CSF2;KDM1A;NAB1;FMR1;GMNN;EIF4A3;ARID4A;EPRS;RBPJ;PHB2;ELK3;RPS6KA5;BASP1;SCMH1;CIR1;SFMBT1;ZBTB38;ZBTB33;PASK;GTPBP4;EID1;ILF3;PSPC1;DDIT3;NCL;TIMELESS;TRIB3;KHDRBS1;SET;SHMT1;PDS5A;GIGYF2;FXR1;LARP1;ZBED6;S100A11;SNX6;SMAD2;HSPA8;XRCC6;UBE2I;CBX5;SMURF2;XRCC5;CBX3;NONO;SETDB2;HMGA1;EIF2AK2;HMGA2;NR1D2;CDC6;PA2G4;MEX3C;DHFR;MEX3A;CNOT7;SNW1;CNOT1;CNOT2;COPS2;CAPRIN1;SP3;MDM2;RAD17;CALR;RCOR1;EZH…
regulation of focal adhesion assembly (GO:0051893)	14/44	0.226119	1	0	0	1.23279	1.83278	COL16A1;ROCK1;ROCK2;RCC2;PTEN;EFNA5;THBS1;RHOA;PTK2;SLK;PHLDB2;CLASP1;S100A10;LIMS1
regulation of plasma membrane bounded cell projection organization (GO:0120035)	5/13	0.226791	1	0	0	1.49018	2.21102	CCDC88A;NCS1;TCTEX1D2;PTEN;VPS35
negative regulation of epidermal growth factor-activated receptor activity (GO:0007175)	5/13	0.226791	1	0	0	1.49018	2.21102	ERRFI1;TSG101;GPRC5A;SOCS4;SNX6
regulation of necrotic cell death (GO:0010939)	5/13	0.226791	1	0	0	1.49018	2.21102	HEBP2;CASP8;RIPK1;RPS27A;TANK
regulation of retinoic acid receptor signaling pathway (GO:0048385)	5/13	0.226791	1	0	0	1.49018	2.21102	ASXL1;SNW1;CNOT1;CALR;EZH2
regulation of transcription initiation from RNA polymerase II promoter (GO:0060260)	5/13	0.226791	1	0	0	1.49018	2.21102	GTF2B;SUB1;TAF7;GTF2F2;TAF1
glomerular visceral epithelial cell differentiation (GO:0072112)	5/13	0.226791	1	0	0	1.49018	2.21102	NUP93;MYO1E;JAG1;BASP1;IQGAP1
negative regulation of mRNA splicing, via spliceosome (GO:0048025)	5/13	0.226791	1	0	0	1.49018	2.21102	PTBP1;RNPS1;SRSF7;SRSF10;SRSF12
endoplasmic reticulum tubular network organization (GO:0071786)	5/13	0.226791	1	0	0	1.49018	2.21102	RAB10;ARL6IP1;ATL2;RAB18;RTN4
positive regulation of actin nucleation (GO:0051127)	5/13	0.226791	1	0	0	1.49018	2.21102	CYFIP1;NCKAP1;ABI2;WASL;WASF1
activation of JUN kinase activity (GO:0007257)	10/30	0.226966	1	0	0	1.29149	1.91522	SPAG9;MAP3K2;MAP2K4;MDFIC;TAOK1;AXIN1;RIPK1;MAP3K9;MAP4K5;MAP3K5
regulation of cell adhesion mediated by integrin (GO:0033628)	10/30	0.226966	1	0	0	1.29149	1.91522	EFNA1;FOXC2;TGFB2;PLAU;EPHA8;ADAM9;PTPN11;PTK2;ADA;EPHA2
nuclear envelope organization (GO:0006998)	10/30	0.226966	1	0	0	1.29149	1.91522	NUP93;NSFL1C;SPAST;NUP155;UBXN2A;REEP3;PLK1;CHMP2A;TOR1AIP2;LEMD3
epithelial to mesenchymal transition (GO:0001837)	12/37	0.227491	1	0	0	1.25658	1.86055	GSK3B;DDX5;TGFB2;DLG5;HMGA2;CTNNB1;S100A4;RBPJ;FAM83D;HIF1A;HNRNPAB;TGFBR1
positive regulation of receptor activity (GO:2000273)	12/37	0.227491	1	0	0	1.25658	1.86055	ITGB1;MBD4;FBXW7;GSTO1;BUD31;TGFA;PARK7;HAP1;PKD2;ALG10B;CALM2;TAF1
regulation of endoplasmic reticulum stress-induced intrinsic apoptotic signaling pathway (GO:1902235)	7/20	0.240287	1	0	0	1.35606	1.93364	BCL2L11;OPA1;DDIT3;TXNDC12;PARK7;BOK;NCK1
viral budding via host ESCRT complex (GO:0039702)	7/20	0.240287	1	0	0	1.35606	1.93364	TSG101;VPS4B;CHMP1B;CHMP2B;CHMP2A;CHMP4C;VPS37A
purine nucleotide metabolic process (GO:0006163)	7/20	0.240287	1	0	0	1.35606	1.93364	PRPS1;NT5E;MTHFD1;PPAT;NUDT1;NT5C2;ITPA
covalent chromatin modification (GO:0016569)	7/20	0.240287	1	0	0	1.35606	1.93364	SETD5;HELLS;HDAC1;MBD2;SIRT1;CHD1;AURKB
melanosome localization (GO:0032400)	7/20	0.240287	1	0	0	1.35606	1.93364	ARL6;SHROOM2;MYO5A;BBS7;BBS5;RAB11A;BBS4
vesicle cytoskeletal trafficking (GO:0099518)	7/20	0.240287	1	0	0	1.35606	1.93364	NDE1;KIF5B;MYO5A;WASL;HAP1;FNBP1L;PAFAH1B1
mesenchymal cell differentiation (GO:0048762)	13/41	0.241941	1	0	0	1.22849	1.7433	GSK3B;DDX5;FOXC1;TGFB2;HMGA2;RBPJ;HIF1A;HNRNPAB;TGFBR1;DLG5;CTNNB1;S100A4;FAM83D
regulation of stress-activated MAPK cascade (GO:0032872)	13/41	0.241941	1	0	0	1.22849	1.7433	IGBP1;TGFB2;EIF2AK2;FOXM1;IGF1R;COPS5;PDCD10;MYC;TAOK1;NBR1;MAPK1;FAS;MAP4K4
mitotic spindle midzone assembly (GO:0051256)	4/10	0.243302	1	0	0	1.54979	2.19055	RACGAP1;KIF23;AURKB;CDC14B
negative regulation of oxidative stress-induced neuron death (GO:1903204)	4/10	0.243302	1	0	0	1.54979	2.19055	NONO;PARK7;HIF1A;ATF4
protein K11-linked deubiquitination (GO:0035871)	4/10	0.243302	1	0	0	1.54979	2.19055	VCPIP1;USP37;OTUD7B;TNFAIP3
glycine metabolic process (GO:0006544)	4/10	0.243302	1	0	0	1.54979	2.19055	GCSH;SHMT2;SHMT1;SLC25A32
I-kappaB phosphorylation (GO:0007252)	4/10	0.243302	1	0	0	1.54979	2.19055	PRDX4;CHUK;TLR4;TLR3
negative regulation of autophagosome assembly (GO:1902902)	4/10	0.243302	1	0	0	1.54979	2.19055	SCFD1;PHF23;FEZ2;SEC22B
Rap protein signal transduction (GO:0032486)	4/10	0.243302	1	0	0	1.54979	2.19055	RAP2C;RAP1B;RAP1A;PLK2
protein-cofactor linkage (GO:0018065)	4/10	0.243302	1	0	0	1.54979	2.19055	GCSH;LIPT1;SDHAF2;LIAS
protein deneddylation (GO:0000338)	4/10	0.243302	1	0	0	1.54979	2.19055	COPS4;COPS3;COPS5;COPS2
regulation of gene expression by genetic imprinting (GO:0006349)	4/10	0.243302	1	0	0	1.54979	2.19055	PRMT7;ZFP57;PCGF5;PCGF3
negative regulation of intracellular estrogen receptor signaling pathway (GO:0033147)	4/10	0.243302	1	0	0	1.54979	2.19055	CNOT1;CNOT2;BRCA1;STRN3
negative regulation of sodium ion transmembrane transporter activity (GO:2000650)	4/10	0.243302	1	0	0	1.54979	2.19055	CAMK2D;NEDD4;OSR1;STK39
negative regulation of embryonic development (GO:0045992)	4/10	0.243302	1	0	0	1.54979	2.19055	RPS6KA6;FZD3;GPR161;CTNNB1
dicarboxylic acid biosynthetic process (GO:0043650)	4/10	0.243302	1	0	0	1.54979	2.19055	MTHFD1L;MTHFD1;GLS2;GLS
negative regulation of endoplasmic reticulum unfolded protein response (GO:1900102)	4/10	0.243302	1	0	0	1.54979	2.19055	PPP1R15A;HSPA5;DNAJB9;NCK1
medium-chain fatty acid metabolic process (GO:0051791)	4/10	0.243302	1	0	0	1.54979	2.19055	ACOT7;ABHD2;ACAD9;CROT
protein deglycosylation (GO:0006517)	4/10	0.243302	1	0	0	1.54979	2.19055	MGEA5;MAN2A1;PARK7;AGA
peptidyl-serine dephosphorylation (GO:0070262)	4/10	0.243302	1	0	0	1.54979	2.19055	PPP2CB;PPP2R2D;PPP2R2A;NCK1
amino sugar metabolic process (GO:0006040)	4/10	0.243302	1	0	0	1.54979	2.19055	CSGALNACT1;EXTL2;SLC35A3;GFPT1
regulation of transforming growth factor beta production (GO:0071634)	4/10	0.243302	1	0	0	1.54979	2.19055	TGFB2;SMAD3;PTGS2;HIF1A
apoptotic mitochondrial changes (GO:0008637)	11/34	0.244105	1	0	0	1.2535	1.76764	GGCT;BCL2;THEM4;VPS35;NDUFS1;MFF;BID;DNM1L;HSPD1;IFIT2;BOK
regulation of JUN kinase activity (GO:0043506)	11/34	0.244105	1	0	0	1.2535	1.76764	DNAJA1;PAK1;EDN1;DUSP19;DVL2;RPS3;PDCD4;AIDA;TANK;ARHGEF5;MAP3K5
positive regulation of DNA binding (GO:0043388)	11/34	0.244105	1	0	0	1.2535	1.76764	FOXC1;NIPBL;PINX1;CEBPG;HMGB2;PLAUR;HMGA2;PARK7;HMGB1;POU4F1;NME1
regulation of interferon-beta production (GO:0032648)	11/34	0.244105	1	0	0	1.2535	1.76764	PPM1B;DDX3X;TBK1;POLR3A;POLR3B;POLR3D;POLR3F;POLR3G;TLR4;TIRAP;TLR3
positive regulation of exocytosis (GO:0045921)	11/34	0.244105	1	0	0	1.2535	1.76764	SDCBP;TSG101;SDC4;VPS4B;CHMP2A;STXBP5;STAM;SNF8;RAB5A;CLASP1;EXPH5
extrinsic apoptotic signaling pathway via death domain receptors (GO:0008625)	9/27	0.244237	1	0	0	1.29149	1.8205	CASP8AP2;MOAP1;DDX3X;CASP8;DDX47;BLOC1S2;BCL2;TNFRSF10B;BID
protein targeting to vacuole (GO:0006623)	9/27	0.244237	1	0	0	1.29149	1.8205	AP3M1;ZFYVE16;SNX16;LARS;NEDD4;NCOA4;VPS41;VPS13A;GCC2
negative regulation of organelle assembly (GO:1902116)	9/27	0.244237	1	0	0	1.29149	1.8205	SCFD1;PHF23;FEZ2;TRIM37;BRCA1;CEP97;SEC22B;CDK5RAP2;MDM1
negative regulation of microtubule polymerization or depolymerization (GO:0031111)	9/27	0.244237	1	0	0	1.29149	1.8205	NAV3;APC;STMN1;ARHGEF2;FKBP4;MAPRE1;CAMSAP1;CLASP1;TTBK2
vascular endothelial growth factor receptor signaling pathway (GO:0048010)	21/70	0.248994	1	0	0	1.16234	1.61603	VAV3;CYFIP1;NCKAP1;HSP90AA1;BMPR2;ROCK1;ROCK2;VEGFC;PIK3CB;RHOA;PTK2;ACTG1;MAPK13;CDC42;PIK3CA;AXL;ABI1;ITGAV;CRK;PAK2;NCK1
positive regulation of proteasomal ubiquitin-dependent protein catabolic process (GO:0032436)	21/70	0.248994	1	0	0	1.16234	1.61603	PSMD10;GSK3B;VCP;ANKIB1;CSNK1A1;PLK1;CSNK1D;RBX1;NUB1;SUMO1;RNF138;RFWD2;RNF19A;SUMO2;RNF217;MDM2;TRIB3;BBS7;ARIH1;LONRF1;TAF1
regulation of DNA binding (GO:0051101)	16/52	0.250254	1	0	0	1.19214	1.65145	CDT1;FOXC1;KDM1A;CDCA5;CEBPG;HJURP;HMGB2;PLAUR;HMGA2;RSF1;HMGB1;NME1;SUMO1;SUMO3;E2F1;JAK2
negative regulation of dephosphorylation (GO:0035305)	19/63	0.25494	1	0	0	1.16849	1.59701	PPP1R15A;FARP1;RBM26;PPP1R12A;PPP1R11;YWHAB;ZCCHC9;GPATCH2;RRP1B;ARPP19;SPRED1;DLG3;CHORDC1;ENSA;PPP1R8;CD2BP2;MPHOSPH10;CEP192;PPP1R12B
negative regulation of protein modification process (GO:0031400)	19/63	0.25494	1	0	0	1.16849	1.59701	PPP1R15A;PRNP;WARS;PPP1R11;YWHAB;TRAF3IP1;PRKDC;PTEN;FAM129A;PARK7;SIRT1;ARPP19;IBTK;CHORDC1;ENSA;PPP1R8;DNAJC10;TARDBP;CDK5RAP3
cytosolic transport (GO:0016482)	34/118	0.257196	1	0	0	1.11637	1.51594	VPS29;TMEM87A;BECN1;CLTC;ARL1;RHOBTB3;GCC2;VPS26A;PTPN23;EEA1;SNX1;SNX2;VPS54;VPS35;EVI5;RAB6B;EPS15;SNX5;SNX6;SPAG9;ANKRD27;STX8;AKTIP;VPS13A;SNF8;HOOK3;KLHL20;HOOK2;SNX16;KIF16B;HOOK1;PIK3C3;TBC1D23;RAB5A
positive regulation of protein metabolic process (GO:0051247)	28/96	0.258693	1	0	0	1.13005	1.52796	GSK3B;MTPN;VCP;CDKN1B;CSF1;ROCK2;UHRF1;TNFAIP3;IDE;PSEN1;BARD1;CSNK2A1;SMURF2;PRMT1;TIPARP;PLK2;AXIN1;WNT7A;CNPY2;INHBA;SNF8;DDB1;ITCH;HNRNPK;APC;NEDD4;SEC22B;DTL
positive regulation of neuron death (GO:1901216)	12/38	0.259303	1	0	0	1.22352	1.65145	EFNB2;SRPK2;GSK3B;PRNP;TGFB2;DDIT3;CTNNB1;EIF2S1;TLR4;MAP3K5;PICALM;ATF4
pigment granule transport (GO:0051904)	6/17	0.259948	1	0	0	1.36746	1.84234	ARL6;MYO5A;BBS7;BBS5;RAB11A;BBS4
N-glycan processing (GO:0006491)	6/17	0.259948	1	0	0	1.36746	1.84234	EDEM3;FUT8;MAN1A2;MAN2A1;MGAT4B;MAN1B1
positive regulation of stem cell proliferation (GO:2000648)	6/17	0.259948	1	0	0	1.36746	1.84234	FZD3;EPCAM;HNRNPU;HMGA2;CTNNB1;N4BP2L2
regulation of synaptic vesicle exocytosis (GO:2000300)	6/17	0.259948	1	0	0	1.36746	1.84234	RIMS2;NAPB;PREPL;FMR1;RAB5A;RAB3GAP1
positive regulation by host of viral transcription (GO:0043923)	6/17	0.259948	1	0	0	1.36746	1.84234	SNW1;GTF2B;TAF11;NUCKS1;RRP1B;CHD1
regulation of establishment or maintenance of cell polarity (GO:0032878)	6/17	0.259948	1	0	0	1.36746	1.84234	ARFGEF1;RAP1B;ROCK1;ROCK2;KRIT1;KIF20B
melanosome transport (GO:0032402)	6/17	0.259948	1	0	0	1.36746	1.84234	ARL6;MYO5A;BBS7;BBS5;RAB11A;BBS4
regulation of cellular protein catabolic process (GO:1903362)	6/17	0.259948	1	0	0	1.36746	1.84234	HSP90AA1;RDX;MSN;VPS35;EZR;CDK5RAP3
protein localization to basolateral plasma membrane (GO:1903361)	3/7	0.260561	1	0	0	1.66049	2.23321	RAB10;PDZD11;LIN7C
negative regulation of keratinocyte proliferation (GO:0010839)	3/7	0.260561	1	0	0	1.66049	2.23321	MBD4;CASK;PTPRK
regulation of ER to Golgi vesicle-mediated transport (GO:0060628)	3/7	0.260561	1	0	0	1.66049	2.23321	RINT1;SCFD1;RNF139
cytoplasmic sequestering of NF-kappaB (GO:0007253)	3/7	0.260561	1	0	0	1.66049	2.23321	PSMD10;FAF1;G3BP2
death-inducing signaling complex assembly (GO:0071550)	3/7	0.260561	1	0	0	1.66049	2.23321	CASP8;RIPK1;TANK
negative regulation of dendrite morphogenesis (GO:0050774)	3/7	0.260561	1	0	0	1.66049	2.23321	EFNA1;PTEN;YWHAH
strand invasion (GO:0042148)	3/7	0.260561	1	0	0	1.66049	2.23321	RAD51C;RAD51;XRCC2
regulation of isotype switching (GO:0045191)	3/7	0.260561	1	0	0	1.66049	2.23321	INSL6;TFRC;SUPT6H
formation of translation preinitiation complex (GO:0001731)	3/7	0.260561	1	0	0	1.66049	2.23321	MCTS1;DENR;EIF4B
positive regulation of macrophage migration (GO:1905523)	3/7	0.260561	1	0	0	1.66049	2.23321	CSF1;KARS;THBS1
regulation of low-density lipoprotein particle receptor biosynthetic process (GO:0045714)	3/7	0.260561	1	0	0	1.66049	2.23321	HNRNPK;CNPY2;ITGAV
regulation of transcription from RNA polymerase II promoter involved in heart development (GO:1901213)	3/7	0.260561	1	0	0	1.66049	2.23321	ACVR1;RBPJ;BMPR1A
protection from non-homologous end joining at telomere (GO:0031848)	3/7	0.260561	1	0	0	1.66049	2.23321	DCLRE1B;DCLRE1A;TERF2
V(D)J recombination (GO:0033151)	3/7	0.260561	1	0	0	1.66049	2.23321	HMGB2;LIG4;HMGB1
pharyngeal arch artery morphogenesis (GO:0061626)	3/7	0.260561	1	0	0	1.66049	2.23321	TGFB2;BMPR2;BMPR1A
pentose metabolic process (GO:0019321)	3/7	0.260561	1	0	0	1.66049	2.23321	RPIA;RPE;XYLB
positive regulation of macrophage chemotaxis (GO:0010759)	3/7	0.260561	1	0	0	1.66049	2.23321	CSF1;KARS;THBS1
response to increased oxygen levels (GO:0036296)	3/7	0.260561	1	0	0	1.66049	2.23321	ATP6V1A;TMEM199;ATP6V1G1
kidney epithelium development (GO:0072073)	3/7	0.260561	1	0	0	1.66049	2.23321	PAX8;OSR1;WNT7B
negative regulation of retinoic acid receptor signaling pathway (GO:0048387)	3/7	0.260561	1	0	0	1.66049	2.23321	CNOT1;CALR;EZH2
membrane invagination (GO:0010324)	3/7	0.260561	1	0	0	1.66049	2.23321	FCHO2;CHMP2A;FNBP1L
negative regulation of cyclin-dependent protein serine/threonine kinase activity involved in G1/S transition of mitotic cell cycle (GO:0031658)	3/7	0.260561	1	0	0	1.66049	2.23321	CDK6;CDK4;PTEN
regulation of cyclic nucleotide metabolic process (GO:0030799)	3/7	0.260561	1	0	0	1.66049	2.23321	PKD2;THBS1;CALM2
cardiac muscle cell-cardiac muscle cell adhesion (GO:0086042)	3/7	0.260561	1	0	0	1.66049	2.23321	DSP;CXADR;DSG2
regulation of entry of bacterium into host cell (GO:2000535)	3/7	0.260561	1	0	0	1.66049	2.23321	FUCA2;ITGAV;EXOC2
progesterone receptor signaling pathway (GO:0050847)	3/7	0.260561	1	0	0	1.66049	2.23321	YAP1;NEDD4;UBR5
regulation of chromatin assembly or disassembly (GO:0001672)	3/7	0.260561	1	0	0	1.66049	2.23321	TLK2;TLK1;SPTY2D1
mitochondrial DNA metabolic process (GO:0032042)	3/7	0.260561	1	0	0	1.66049	2.23321	PARP1;LONP1;DNA2
vesicle transport along actin filament (GO:0030050)	3/7	0.260561	1	0	0	1.66049	2.23321	MYO5A;WASL;FNBP1L
posttranslational protein targeting to endoplasmic reticulum membrane (GO:0006620)	3/7	0.260561	1	0	0	1.66049	2.23321	HYOU1;SEC62;SEC63
left/right pattern formation (GO:0060972)	3/7	0.260561	1	0	0	1.66049	2.23321	AHI1;CITED2;SETDB2
retrograde axonal transport (GO:0008090)	3/7	0.260561	1	0	0	1.66049	2.23321	DST;HAP1;PAFAH1B1
pteridine-containing compound biosynthetic process (GO:0042559)	3/7	0.260561	1	0	0	1.66049	2.23321	DHFR;SPR;ATPIF1
protein targeting (GO:0006605)	38/133	0.261039	1	0	0	1.10699	1.48678	ARL6;ZDHHC20;FUT10;TIMM9;RPL11;AP4E1;ZDHHC23;ZDHHC6;CHM;ZDHHC21;SRP14;MFF;TOMM20;ZDHHC2;TOMM22;SDCBP;PITRM1;SEC61G;LAMP2;TIMM17A;AP1S3;GOLGA7;SEC63;PRKCI;VPS13A;TIMM22;SRP68;SPCS3;SPCS2;PARD3;CDC37;VPS41;ATG4C;EXOC4;TOMM7;HAP1;OPTN;TOMM5
organelle transport along microtubule (GO:0072384)	10/31	0.262517	1	0	0	1.24983	1.67157	CDC42;ARHGAP21;RHOT1;KIF5B;NDE1;COPG2;HAP1;BICD1;LRPPRC;PAFAH1B1
negative regulation of G1/S transition of mitotic cell cycle (GO:2000134)	8/24	0.263604	1	0	0	1.29149	1.72195	RBL1;GPNMB;PRKDC;PTEN;PKD2;BRD7;CDC73;E2F7
receptor catabolic process (GO:0032801)	8/24	0.263604	1	0	0	1.29149	1.72195	SH3GLB1;BECN1;ZNRF3;KIF16B;SNX25;NEDD4;CLTC;AP2B1
protein alpha-1,2-demannosylation (GO:0036508)	8/24	0.263604	1	0	0	1.29149	1.72195	EDEM3;RNF139;MAN1A2;DERL2;MAN1B1;MARCH6;RPS27A;UGGT1
Golgi to plasma membrane protein transport (GO:0043001)	8/24	0.263604	1	0	0	1.29149	1.72195	RAB10;GOLGA4;RAB31;KRT18;GOLPH3L;GOLGA7;BLZF1;OPTN
protein heterooligomerization (GO:0051291)	15/49	0.267006	1	0	0	1.18606	1.56617	SEPT11;CPSF7;XRCC6;CPSF6;WIZ;IKZF5;SEPT7;MAT2A;TRPS1;CHMP2A;RCC1;RIPK1;FARSA;S100A10;FARSB
regulation of cell growth (GO:0001558)	56/201	0.275912	1	0	0	1.07945	1.38998	OGFR;BTG1;CDKN1B;BMPR2;DDX3X;KIF14;TMEM97;ING1;NPPB;RPS6KA3;GJA1;USP47;CSNK2A1;NCBP1;SPHK1;ADAM10;SIRT1;TGFBR1;ST7L;SUPV3L1;NME6;SGK3;FXN;BLZF1;PSMD10;MTPN;CAMK2D;EI24;TAF9;DERL2;CDKN2AIP;RTN4;CDC42;CYP27B1;SDCBP;SERTAD2;CCDC85B;EXOSC9;SH3BP4;APBB2;RBBP7;EXOSC2;TGFB2;SMAD3;H3F3A;OSGIN2;INHBA;CDK11B;ESR2;DCBLD2;ITCH;BCL2;FGFR1OP;CRLF3;EBAG9;EIF4G2
regulation of phosphoprotein phosphatase activity (GO:0043666)	11/35	0.27845	1	0	0	1.21769	1.55684	PPP1R15A;FKBP1A;GSK3B;NUAK1;HSP90AB1;PPP1R12A;PPP1R11;TIPRL;MASTL;CALM2;HSP90B1
positive regulation of DNA replication (GO:0045740)	11/35	0.27845	1	0	0	1.21769	1.55684	CDT1;KITLG;PCNA;CSF2;NPM2;DBF4;DHX9;PDGFC;DNA2;CALR;IGF1R
mitotic cell cycle arrest (GO:0071850)	5/14	0.282565	1	0	0	1.38374	1.74883	CDKN1B;PNPT1;GADD45A;CDC14B;MCPH1
positive regulation of response to cytokine stimulus (GO:0060760)	5/14	0.282565	1	0	0	1.38374	1.74883	TSLP;DHX9;IL7;AXL;TAF9
negative regulation of hemopoiesis (GO:1903707)	5/14	0.282565	1	0	0	1.38374	1.74883	CDK6;CTR9;LEO1;WDR61;CDC73
cellular response to osmotic stress (GO:0071470)	5/14	0.282565	1	0	0	1.38374	1.74883	DDX3X;TRPV4;STK39;ARHGEF2;PKD2
epiboly involved in wound healing (GO:0090505)	5/14	0.282565	1	0	0	1.38374	1.74883	PDCD10;RHOC;RHOA;CYR61;CD44
regulation of transferase activity (GO:0051338)	5/14	0.282565	1	0	0	1.38374	1.74883	ZYG11B;PARP4;BAG5;FEM1B;PINX1
regulation of synapse organization (GO:0050807)	5/14	0.282565	1	0	0	1.38374	1.74883	FXR1;FMR1;NEDD4;VPS35;PDLIM5
cellular response to nitrogen compound (GO:1901699)	5/14	0.282565	1	0	0	1.38374	1.74883	BLM;FMR1;DDX11;ATRX;TIMELESS
purine nucleotide catabolic process (GO:0006195)	5/14	0.282565	1	0	0	1.38374	1.74883	NT5E;HINT1;NUDT1;NT5C2;ITPA
positive regulation of muscle hypertrophy (GO:0014742)	5/14	0.282565	1	0	0	1.38374	1.74883	MTPN;CAMK2D;EDN1;PARP1;PRKCA
regulation of protein modification by small protein conjugation or removal (GO:1903320)	5/14	0.282565	1	0	0	1.38374	1.74883	HSP90AA1;ITCH;HSP90AB1;RNF139;TGFBR1
regulation of mRNA catabolic process (GO:0061013)	5/14	0.282565	1	0	0	1.38374	1.74883	PNPT1;CNOT7;CNOT1;FMR1;RC3H1
clathrin coat assembly (GO:0048268)	5/14	0.282565	1	0	0	1.38374	1.74883	CLTC;FCHO2;PIK3C2A;EPS15;PICALM
lipid particle organization (GO:0034389)	5/14	0.282565	1	0	0	1.38374	1.74883	FAF2;RAB18;PPIA;RAB3GAP1;PPID
regulation of nucleocytoplasmic transport (GO:0046822)	5/14	0.282565	1	0	0	1.38374	1.74883	KHDRBS1;XPO1;NEDD4;XPO5;NUDT4
negative regulation of response to DNA damage stimulus (GO:2001021)	9/28	0.283069	1	0	0	1.24536	1.57173	PSMD10;RTEL1;KDM1A;RPS3;THOC1;MDM2;THOC5;SIRT1;CD44
negative regulation of JNK cascade (GO:0046329)	9/28	0.283069	1	0	0	1.24536	1.57173	DNAJA1;ITCH;MECOM;MARVELD3;DUSP19;PDCD4;AIDA;ZMYND11;FKTN
neuron projection extension (GO:1990138)	9/28	0.283069	1	0	0	1.24536	1.57173	CYFIP1;PPP3CB;FLRT3;USP9X;FLRT1;CTNNB1;PLXNB1;IQGAP1;LLPH
positive regulation of cellular process (GO:0048522)	140/519	0.284696	1	0	0	1.04514	1.31304	CSF3;CSF1;FMR1;RTKN2;SCX;SMC5;SMC6;CTGF;CCAR1;IGF1R;RPS6KA3;HMGN5;RPS19;CCND1;CSPP1;MYC;CHEK1;RPS9;TIPIN;CSNK2A1;RPL23;F2R;ADAM10;DICER1;ACSL3;TIAM1;RRAGA;EID3;PARD3;PHIP;KIF20B;EPHA1;EZR;PSMD10;DLX1;MTMR2;CUL3;EIF5A2;COX17;NOP2;TGFA;HTRA2;CDKN2AIP;EFNB2;SDCBP;PDCD10;PDGFC;SSR1;MCTS1;SRPK2;TGFB2;TSLP;RDX;H3F3A;LIF;MSN;HMGA2;CDC7;CDC6;PA2G4;UBE2A;PTK2;FOSL1;CNOT6;FER;CNOT7;GDNF;CDK4;IL7;CDK2;ACER3…
regulation of fibroblast proliferation (GO:0048145)	14/46	0.285225	1	0	0	1.17919	1.47926	MORC3;DHX9;SPHK1;LIG4;BMI1;CDC73;CDK6;CDK4;MYC;PDGFC;E2F1;S100A6;CTNNB1;DDR2
regulation of G1/S transition of mitotic cell cycle (GO:2000045)	14/46	0.285225	1	0	0	1.17919	1.47926	DDX3X;RDX;KIF14;PTEN;PKD2;CDC73;CDC45;RBL1;GPNMB;E2F1;PSME1;PSME2;BRD7;E2F7
histone lysine demethylation (GO:0070076)	7/21	0.285562	1	0	0	1.29149	1.61862	KDM5A;KDM3A;KDM4C;KDM3B;KDM1A;KDM4D;JMJD1C
negative regulation of cyclin-dependent protein kinase activity (GO:1904030)	7/21	0.285562	1	0	0	1.29149	1.61862	LATS1;CDKN1B;APC;PLK1;CDK5RAP1;IPO7;IPO5
positive regulation of receptor internalization (GO:0002092)	7/21	0.285562	1	0	0	1.29149	1.61862	ATAD1;CD63;AHI1;FMR1;PICK1;SCYL2;APLN
epidermal growth factor receptor signaling pathway (GO:0007173)	17/57	0.288145	1	0	0	1.15554	1.43783	STYK1;TGFA;PTPN11;IQGAP1;PIK3C2A;PTK2;EPS8;NRAS;RPS6KA5;PIK3CA;KIF16B;ABL2;KRAS;SOS1;EPS15;FAM83B;HBEGF
activation of cysteine-type endopeptidase activity involved in apoptotic process (GO:0006919)	23/79	0.28849	1	0	0	1.12801	1.40222	CASP8AP2;VCP;SMAD3;APAF1;F2R;RPS27L;TNFRSF10B;HSPE1;TANK;HSPD1;CASP8;CASP12;AIFM1;FAM162A;CASP3;CASP1;FAS;CYCS;RIPK1;ANP32B;IFT57;JAK2;BOK
negative regulation of phosphatase activity (GO:0010923)	20/68	0.28895	1	0	0	1.13955	1.41475	PPP1R15A;GSK3B;FARP1;TGFB2;RBM26;PPP1R12A;PPP1R11;ZCCHC9;GPATCH2;RRP1B;MASTL;FKBP1A;SPRED1;DLG3;CHORDC1;TIPRL;CD2BP2;MPHOSPH10;CEP192;PPP1R12B
positive regulation of protein kinase activity (GO:0045860)	48/172	0.290027	1	0	0	1.08125	1.33835	DDX3X;CSF1;STK39;KIF14;DUSP19;IQGAP1;LRP8;CYR61;STK3;PAK1;SLK;RAP1A;PDCD10;NEK1;SNX9;CLSPN;ECT2;PAK3;MAP4K5;PAK2;MAP4K3;MAP4K4;MAP3K2;MAP2K4;PRNP;TGFB2;XRCC6;NEK4;XRCC5;AXIN1;OXSR1;PTK2;RHOA;TOM1L1;EFNA1;TPX2;CENPE;ETAA1;DLG3;STK24;ALS2;IL23A;TAOK1;SPDYA;TAB2;CALM2;EZH2;DDR2
cellular response to amino acid starvation (GO:0034198)	12/39	0.292525	1	0	0	1.19214	1.46539	SH3GLB1;RRAGA;SEH1L;MIOS;RRAGC;LARS;MAPK1;EIF2AK2;FAS;EIF2S1;MAP3K5;ATF4
neurogenesis (GO:0022008)	15/50	0.296431	1	0	0	1.16234	1.41333	NOM1;TGFB2;RYK;THOC2;CIT;METTL14;CDK6;SIX4;CDH1;KIF3A;BTBD3;COPS2;CHAC1;HAP1;CDK5RAP2
negative regulation of cell cycle (GO:0045786)	21/72	0.297145	1	0	0	1.13005	1.37136	BTG4;BTG3;FOXC1;BTG1;CDKN1B;SMAD3;GMNN;PLK1;HTRA2;PTPRK;INHBA;IPO7;IPO5;LATS1;DLG1;CDK6;APC;CDK5RAP1;PDCD4;HECA;MAD2L1
positive regulation of cysteine-type endopeptidase activity involved in apoptotic process (GO:0043280)	31/109	0.297336	1	0	0	1.10191	1.3365	VCP;DDX3X;PDCD5;HTRA2;RPS27L;HMGB1;TANK;HSPD1;CASP8;CASP12;AIFM1;FAM162A;MYC;CASP3;CASP1;RPS3;RIPK1;IFT57;JAK2;MAP3K5;BOK;CASP8AP2;SMAD3;APAF1;F2R;TNFRSF10B;HSPE1;SIRT1;CYCS;FAS;ANP32B
substrate adhesion-dependent cell spreading (GO:0034446)	10/32	0.299687	1	0	0	1.21077	1.459	EFNA1;FER;KIF14;MICALL2;TYRO3;ITGAV;LAMB1;PARVA;SRGAP2;EPHA1
protein deacetylation (GO:0006476)	10/32	0.299687	1	0	0	1.21077	1.459	MORF4L1;HDAC2;HDAC1;TBL1XR1;MORF4L2;BRMS1L;MIER1;MSL3;TBL1X;SIRT1
intrinsic apoptotic signaling pathway by p53 class mediator (GO:0072332)	13/43	0.3051	1	0	0	1.17135	1.39053	DDX5;RPS27L;KRCC1;SIRT1;POU4F1;RRP8;HINT1;ZMAT1;SNW1;MSH2;MYBBP1A;JMY;BOK
response to hydrogen peroxide (GO:0042542)	13/43	0.3051	1	0	0	1.17135	1.39053	PLEKHA1;TNFAIP3;PARK7;SIRT1;MAPK13;SETX;STK24;PDCD10;RPS3;ADAM9;ECT2;FXN;MAP3K5
protein import into nucleus, translocation (GO:0000060)	8/25	0.306219	1	0	0	1.23983	1.46728	CEP57;TNPO1;RANBP6;PHB2;KPNB1;RAN;IPO5;RBM22
regulation of apoptotic signaling pathway (GO:2001233)	8/25	0.306219	1	0	0	1.23983	1.46728	NR4A2;CYLD;TRIM39;RPS3;BCL2;FAS;TPD52L1;TGFBR1
positive regulation of nitric oxide biosynthetic process (GO:0045429)	8/25	0.306219	1	0	0	1.23983	1.46728	EDN1;HSP90AA1;HSP90AB1;SMAD3;DDAH1;PKD2;PTGS2;TLR4
positive regulation of nitric oxide metabolic process (GO:1904407)	8/25	0.306219	1	0	0	1.23983	1.46728	EDN1;HSP90AA1;HSP90AB1;SMAD3;DDAH1;PKD2;PTGS2;TLR4
regulation of myeloid cell differentiation (GO:0045637)	19/65	0.306346	1	0	0	1.13254	1.33983	HSPA9;CSF3;CSF2;CBFB;PRMT1;HDAC1;CTR9;SETD1A;H3F3A;DPY30;ASH2L;WDR61;THBS1;CDC73;CDK6;RBBP5;WDR5;LEO1;HOXA5
negative regulation of apoptotic signaling pathway (GO:2001234)	19/65	0.306346	1	0	0	1.13254	1.33983	ACVR1;PSMD10;DDX3X;MPV17L;PLAUR;PARK7;TRIAP1;THBS1;SH3RF1;TGFBR1;NR4A2;OPA1;BCL2;ITGAV;ITGA6;PHIP;RIPK1;ZMYND11;FXN
positive regulation of response to stimulus (GO:0048584)	16/54	0.306706	1	0	0	1.14799	1.35677	DDX5;TGFB2;HOMER1;DHX9;FMR1;TAF9;HMGA1;HMGA2;SIRT1;CDKN2AIP;PPP3CB;BCLAF1;NSMCE4A;EID3;MYC;EEF1E1
Golgi vesicle transport (GO:0048193)	74/271	0.306774	1	0	0	1.05797	1.25015	PITPNB;GCC2;MIA3;KIF11;IER3IP1;KIF15;GOLGA3;GOLGA5;MYO18A;BCAP29;KIFAP3;TMED7;TMED5;RAB8B;GABARAPL2;TMED9;COG3;GOLPH3L;KIF23;KIF22;DYNLL1;DYNC1LI1;RINT1;DYNC1LI2;VAMP7;CTAGE5;KIF2A;PICK1;KIF2C;EXOC5;SEC22B;ERGIC2;DCTN6;DYNC1I2;COPB2;COPA;SEC23A;STX17;CUL3;COPB1;ARL3;USO1;TGFA;KLHL12;KLC1;LMAN1;SNX1;SCFD1;SNX2;SPAST;RACGAP1;KIF3B;KIF3A;BNIP1;KIF3C;RAB6B;TRAPPC2;TRAPPC3;MYO5A;TRAPPC8;ARCN1;CENPE;KI…
atrial septum morphogenesis (GO:0060413)	4/11	0.309193	1	0	0	1.4089	1.65375	ACVR1;TGFB2;BMPR2;GATA4
negative regulation of defense response to virus (GO:0050687)	4/11	0.309193	1	0	0	1.4089	1.65375	PPM1B;ITCH;TRAF3IP1;PCBP2
replicative senescence (GO:0090399)	4/11	0.309193	1	0	0	1.4089	1.65375	CHEK2;CHEK1;ATM;ATR
intracellular protein transmembrane transport (GO:0065002)	4/11	0.309193	1	0	0	1.4089	1.65375	SRP19;SRP72;HYOU1;SRP9
positive regulation by host of viral process (GO:0044794)	4/11	0.309193	1	0	0	1.4089	1.65375	YTHDC2;NUCKS1;PPIB;SMC3
negative regulation of JUN kinase activity (GO:0043508)	4/11	0.309193	1	0	0	1.4089	1.65375	DNAJA1;PDCD4;DUSP19;AIDA
positive regulation of nuclear-transcribed mRNA poly(A) tail shortening (GO:0060213)	4/11	0.309193	1	0	0	1.4089	1.65375	CNOT7;CNOT1;POLR2G;PABPC1
positive regulation of protein deacetylation (GO:0090312)	4/11	0.309193	1	0	0	1.4089	1.65375	NIPBL;ING2;FNTA;AKAP8
negative regulation of amyloid precursor protein catabolic process (GO:1902992)	4/11	0.309193	1	0	0	1.4089	1.65375	PRNP;ROCK1;HAP1;PICALM
negative regulation of histone acetylation (GO:0035067)	4/11	0.309193	1	0	0	1.4089	1.65375	SET;TAF7;BRCA1;SIRT1
regulation of nuclear-transcribed mRNA poly(A) tail shortening (GO:0060211)	4/11	0.309193	1	0	0	1.4089	1.65375	CNOT7;CNOT1;POLR2G;PABPC1
negative regulation of protein localization to cell surface (GO:2000009)	4/11	0.309193	1	0	0	1.4089	1.65375	LEPROTL1;GOPC;COMMD1;PICALM
cytoplasmic mRNA processing body assembly (GO:0033962)	4/11	0.309193	1	0	0	1.4089	1.65375	DDX6;RC3H1;LSM14A;LSM3
metanephric mesenchyme development (GO:0072075)	4/11	0.309193	1	0	0	1.4089	1.65375	SIX4;BASP1;OSR1;PKD2
cellular response to increased oxygen levels (GO:0036295)	4/11	0.309193	1	0	0	1.4089	1.65375	ATP6V1A;TMEM199;ATP6V1G1;FAS
methylation-dependent chromatin silencing (GO:0006346)	4/11	0.309193	1	0	0	1.4089	1.65375	HELLS;HDAC1;MBD2;SIRT1
regulation of stem cell population maintenance (GO:2000036)	4/11	0.309193	1	0	0	1.4089	1.65375	CNOT1;CNOT2;HMGA2;ELAVL1
regulation of hippo signaling (GO:0035330)	4/11	0.309193	1	0	0	1.4089	1.65375	WWC1;DLG5;WWC2;MARK3
regulation of histone deacetylation (GO:0031063)	4/11	0.309193	1	0	0	1.4089	1.65375	CAMK2D;NIPBL;ING2;AKAP8
morphogenesis of an epithelial sheet (GO:0002011)	4/11	0.309193	1	0	0	1.4089	1.65375	MPP5;LIN7C;ARHGAP12;PHACTR4
negative regulation of nuclear division (GO:0051784)	4/11	0.309193	1	0	0	1.4089	1.65375	TOM1L1;NME6;CHEK1;FBXO5
regulation of amyloid-beta formation (GO:1902003)	6/18	0.310829	1	0	0	1.29149	1.50912	EFNA1;PRNP;ROCK1;ROCK2;HAP1;PICALM
regulation of chemokine production (GO:0032642)	6/18	0.310829	1	0	0	1.29149	1.50912	TSLP;IL7;EIF2AK2;HIF1A;TLR4;TLR3
negative regulation of microtubule depolymerization (GO:0007026)	6/18	0.310829	1	0	0	1.29149	1.50912	NAV3;APC;ARHGEF2;CAMSAP1;CLASP1;TTBK2
heart trabecula morphogenesis (GO:0061384)	6/18	0.310829	1	0	0	1.29149	1.50912	FKBP1A;TGFB2;NRG1;RBPJ;TGFBR1;BMPR1A
negative regulation of oxidative stress-induced intrinsic apoptotic signaling pathway (GO:1902176)	6/18	0.310829	1	0	0	1.29149	1.50912	BAG5;NONO;HTRA2;PARK7;SIRT1;HIF1A
DNA methylation (GO:0006306)	6/18	0.310829	1	0	0	1.29149	1.50912	DNMT1;MTRR;ZFP57;ATRX;BEND3;PICK1
regulation of microtubule polymerization or depolymerization (GO:0031110)	6/18	0.310829	1	0	0	1.29149	1.50912	STMN1;SKA3;FKBP4;SKA1;CAMSAP1;CLASP1
cell-substrate adherens junction assembly (GO:0007045)	6/18	0.310829	1	0	0	1.29149	1.50912	CTTN;ACTN1;RCC2;PIP5K1A;PTPRK;RHOD
mRNA destabilization (GO:0061157)	6/18	0.310829	1	0	0	1.29149	1.50912	TRIM71;METTL14;YTHDF2;YTHDF3;RC3H1;GIGYF2
focal adhesion assembly (GO:0048041)	6/18	0.310829	1	0	0	1.29149	1.50912	CTTN;ACTN1;RCC2;PIP5K1A;PTPRK;RHOD
membrane protein ectodomain proteolysis (GO:0006509)	6/18	0.310829	1	0	0	1.29149	1.50912	BACE1;ERAP1;ADAM10;MYH9;ADAM9;PSEN1
iron-sulfur cluster assembly (GO:0016226)	6/18	0.310829	1	0	0	1.29149	1.50912	HSPA9;GLRX3;NUBPL;FAM96B;CIAPIN1;FXN
regulation of cellular response to transforming growth factor beta stimulus (GO:1903844)	6/18	0.310829	1	0	0	1.29149	1.50912	SMAD2;DLX1;SMAD3;SMURF2;ITGA3;TRIM33
release of cytochrome c from mitochondria (GO:0001836)	6/18	0.310829	1	0	0	1.29149	1.50912	GGCT;BCL2;MFF;BID;DNM1L;BOK
endoplasmic reticulum calcium ion homeostasis (GO:0032469)	6/18	0.310829	1	0	0	1.29149	1.50912	CAMK2D;RAP1GDS1;BCL2;ATP2A2;THADA;PSEN1
maintenance of protein localization in organelle (GO:0072595)	6/18	0.310829	1	0	0	1.29149	1.50912	MORC3;HSPA5;HNRNPU;TAF3;TOPORS;BBS4
post-Golgi vesicle-mediated transport (GO:0006892)	17/58	0.31618	1	0	0	1.13562	1.3076	ARL3;VPS13A;MYO5A;COMMD1;KLHL20;RAB10;SCFD1;MYO1B;VAMP7;KIF16B;EXOC4;VPS54;GOPC;EXOC5;STEAP2;EPS15;EXOC1
phosphorylation (GO:0016310)	104/386	0.322006	1	0	0	1.0439	1.18293	GMFB;RPS6KA3;RPS6KA6;PPP4R1;TBK1;RPS6KA5;CHEK2;AKT3;CHEK1;NEK1;NEK2;MAP3K9;NEK3;PRKACB;XYLB;MAP3K5;CDKL2;ACVR1;PRKCI;MORC3;CDKL5;CSNK2A1;ADAM10;PRKCA;VRK1;PRPF4B;CSNK1D;VRK2;PASK;ILF3;MELK;UQCRB;PRKDC;STK39;STK3;NUAK1;PGK1;STK38L;CDK17;PLK4;SRPK2;CDK19;TGFB2;NEK4;PLK2;PLK1;NEK7;EIF2AK2;SRPK1;FER;CDK6;STK24;CDK4;CDK2;CDK1;ATM;CDK12;CDK14;BMPR1A;GSK3B;DYRK3;ADK;PIK3CB;PPP3CB;TLK2;PRKG2;TLK1;JAK2;CH…
regulation of embryonic development (GO:0045995)	9/29	0.323408	1	0	0	1.20242	1.35734	RPS6KA6;NIPBL;SEPT7;RACGAP1;RBM19;CDK1;TRIP12;PHLDB2;CLASP1
positive regulation of transcription from RNA polymerase II promoter in response to stress (GO:0036003)	9/29	0.323408	1	0	0	1.20242	1.35734	HSPA5;HSF2;DDIT3;RBPJ;HIF1A;ATF6;MBTPS2;ATF3;ATF4
coenzyme biosynthetic process (GO:0009108)	9/29	0.323408	1	0	0	1.20242	1.35734	DHFR;ACOT7;MAT2A;SPR;PANK1;ATPIF1;MAT2B;LIAS;MMADHC
positive regulation of catabolic process (GO:0009896)	18/62	0.324963	1	0	0	1.12485	1.26437	BARD1;GSK3B;VCP;CDKN1B;CSNK2A1;SMURF2;TIPARP;PLK2;AXIN1;TNFAIP3;IDE;SNF8;DDB1;ITCH;APC;NEDD4;SEC22B;DTL
negative regulation of epidermal growth factor receptor signaling pathway (GO:0042059)	12/40	0.32686	1	0	0	1.16234	1.29976	CDC42;ERRFI1;RNF115;TSG101;GPRC5A;STAM;RPS27A;EPS15;STAM2;SOCS4;PTPN2;SNX6
regulation of release of cytochrome c from mitochondria (GO:0090199)	12/40	0.32686	1	0	0	1.16234	1.29976	PSMD10;MOAP1;BCL2L11;OPA1;FAM162A;PDCD5;PLAUR;TRIAP1;MFF;BID;DNM1L;FXN
Fc-epsilon receptor signaling pathway (GO:0038095)	50/182	0.329735	1	0	0	1.06441	1.18093	UBE2D2;PIK3CB;PSMD9;PPP3CA;PSMD6;PPP3CB;PSMD7;PSMD5;PSMD2;PSMD1;IKBKG;VAV3;MAP2K4;CHUK;PSMA5;PSMA6;PSMA3;PSMA4;PIK3CA;PSMA1;PSMA2;PSME4;PSME1;PSME2;SOS1;PSMD10;PSMD12;PSMD11;PSMD14;CUL1;BCL10;PSMA7;NRAS;PAK1;PSMB1;PLCG2;MAPK1;RPS27A;PAK2;MAPK10;FER;PSMC5;PSMC6;PSMC3;PSMC1;PSMC2;UBE2N;TAB3;TAB2;KRAS
positive regulation of protein autophosphorylation (GO:0031954)	7/22	0.332593	1	0	0	1.23279	1.35709	RAP2C;TOM1L1;RAD50;GPNMB;ARTN;PDGFC;CALM2
protein localization to cilium (GO:0061512)	7/22	0.332593	1	0	0	1.23279	1.35709	ARL6;TTC21B;SNX10;CSNK1D;WDR35;ATP6V1D;BBS4
negative regulation of response to endoplasmic reticulum stress (GO:1903573)	7/22	0.332593	1	0	0	1.23279	1.35709	DNAJC3;USP25;UBXN1;OPA1;TXNDC12;PARK7;NCK1
negative regulation of cell cycle G1/S phase transition (GO:1902807)	7/22	0.332593	1	0	0	1.23279	1.35709	RBL1;GPNMB;PTEN;PKD2;BRD7;CDC73;E2F7
sulfur amino acid metabolic process (GO:0000096)	7/22	0.332593	1	0	0	1.23279	1.35709	AHCY;MTRR;MTHFD1;CTH;SMS;MTR;MUT
regulation of microtubule depolymerization (GO:0031114)	7/22	0.332593	1	0	0	1.23279	1.35709	NAV3;APC;TRPV4;ARHGEF2;CAMSAP1;CLASP1;TTBK2
intracellular steroid hormone receptor signaling pathway (GO:0030518)	19/66	0.333143	1	0	0	1.11538	1.226	YAP1;MBD4;KDM3A;DDX5;NCOA4;FHL2;TRIP4;BRCA1;MED4;SAFB;ESR2;MED17;MED13;THRAP3;NEDD4;UBR5;NRIP1;CTNNB1;RAN
positive regulation of protein targeting to mitochondrion (GO:1903955)	23/81	0.336425	1	0	0	1.10016	1.19849	SH3GLB1;CDKL2;USP36;FBXW7;GLS2;PDCD5;UBE2D3;CSNK2A2;NKAP;WDR75;HTRA2;NRG1;WBP11;WDR46;NPEPPS;UBL5;CYB5R1;RUVBL1;MICALL2;TOMM7;PLAGL2;RHOU;SAE1
entry into host cell (GO:0030260)	10/33	0.338059	1	0	0	1.17408	1.27333	ITCH;CDH1;AXL;CTNND1;CTNNB1;ITGAV;RPS27A;EPS15;PPIA;MET
neural tube closure (GO:0001843)	10/33	0.338059	1	0	0	1.17408	1.27333	TGFB2;STIL;MTHFD1L;MTHFD1;DVL2;COBL;BCL10;GRHL2;BBS4;PHACTR4
intra-Golgi vesicle-mediated transport (GO:0006891)	10/33	0.338059	1	0	0	1.17408	1.27333	COPB2;GOLGA3;TRAPPC3;GABARAPL2;COPA;GOLGA5;COPB1;COG3;COPG2;RAB6B
positive regulation of intrinsic apoptotic signaling pathway (GO:2001244)	10/33	0.338059	1	0	0	1.17408	1.27333	BCLAF1;BCL2L11;RPS7;DDIT3;RPS3;BCL2;BID;DNM1L;BOK;NCK1
establishment or maintenance of epithelial cell apical/basal polarity (GO:0045197)	10/33	0.338059	1	0	0	1.17408	1.27333	CDC42;PRKCI;DLG1;DLG3;PDZD11;PARD3;MSN;LIN7C;MYO9A;RHOA
positive regulation of organelle organization (GO:0010638)	10/33	0.338059	1	0	0	1.17408	1.27333	GSK3B;LMAN1;TMED9;ANXA1;ATL3;CALCOCO2;HTRA2;LIG4;PFDN2;RAB3GAP1
activation of MAPKK activity (GO:0000186)	10/33	0.338059	1	0	0	1.17408	1.27333	RAP1A;TAOK1;F2R;EIF2AK2;ADAM9;FRS2;CRK;TGFBR1;STK3;MAP3K5
stem cell differentiation (GO:0048863)	10/33	0.338059	1	0	0	1.17408	1.27333	SETD2;TGFB2;PSMD11;EPCAM;SETD6;OSR1;MTF2;WNT7A;HMGA2;SOX21
positive regulation of macroautophagy (GO:0016239)	13/44	0.338221	1	0	0	1.14473	1.24095	SH3GLB1;BNIP3L;SCOC;CALCOCO2;GNAI3;SIRT1;LARP1;TBK1;SPTLC2;IKBKG;RAB3GAP1;OPTN;PAFAH1B2
positive regulation of nucleic acid-templated transcription (GO:1903508)	134/502	0.339835	1	0	0	1.03422	1.11623	SCX;YEATS4;PSMD9;HMGN5;CDH1;MYC;CHEK2;SMARCAD1;CDK5RAP2;MAP3K5;ACVR1;SMARCC1;ANKRD49;F2R;MED4;ILF2;ILF3;NIF3L1;KARS;TBL1XR1;DDIT3;TFAM;PHIP;ATF4;BLM;ENY2;DDX5;GATA4;BCL10;PSEN1;HIF1A;NPAT;NUP85;DVL2;TASP1;BPTF;IVNS1ABP;SMAD2;XRCC6;SMAD3;NEK4;HMGA1;TRIP4;HMGA2;NR1D2;INHBA;FOXN2;ESR2;FUBP3;SP3;HNRNPD;TCF4;PHF19;PICALM;KDM5A;SETD3;CITED2;FHL2;HMGB2;RSF1;CTCF;BRCA1;FOXM1;BRCA2;GLI3;MED17;CKS1B;ING5;I…
positive regulation of peptidyl-lysine acetylation (GO:2000758)	5/15	0.340501	1	0	0	1.29149	1.39137	RPS6KA5;TADA2A;RUVBL2;BRCA1;BRD7
vitamin D metabolic process (GO:0042359)	5/15	0.340501	1	0	0	1.29149	1.39137	CUBN;CYP27B1;UBE2I;CYP24A1;SUMO2
maintenance of protein location in nucleus (GO:0051457)	5/15	0.340501	1	0	0	1.29149	1.39137	MORC3;HNRNPU;TAF3;TOPORS;BBS4
pyrimidine nucleoside biosynthetic process (GO:0046134)	5/15	0.340501	1	0	0	1.29149	1.39137	UCK2;UPRT;TK1;UMPS;DCK
substrate-dependent cell migration (GO:0006929)	5/15	0.340501	1	0	0	1.29149	1.39137	SDCBP;EPHA8;ITGA2;VEGFC;CD2AP
negative regulation of interleukin-2 production (GO:0032703)	5/15	0.340501	1	0	0	1.29149	1.39137	PRNP;NAV3;TNFAIP3;EZR;GBP1
cellular biogenic amine biosynthetic process (GO:0042401)	5/15	0.340501	1	0	0	1.29149	1.39137	MOXD1;TPH2;SMOX;SMS;SAT1
neural crest cell differentiation (GO:0014033)	5/15	0.340501	1	0	0	1.29149	1.39137	TCOF1;NOLC1;KLHL12;NRG1;KBTBD8
negative regulation of signal transduction by p53 class mediator (GO:1901797)	5/15	0.340501	1	0	0	1.29149	1.39137	PSMD10;KDM1A;MDM2;SIRT1;CD44
positive regulation of NF-kappaB import into nucleus (GO:0042346)	5/15	0.340501	1	0	0	1.29149	1.39137	IL23A;SPHK1;TLR4;RHOA;TLR3
negative regulation of RNA metabolic process (GO:0051253)	5/15	0.340501	1	0	0	1.29149	1.39137	RPS26;PTBP1;SHQ1;PTBP2;RPS13
embryonic cranial skeleton morphogenesis (GO:0048701)	5/15	0.340501	1	0	0	1.29149	1.39137	NIPBL;MTHFD1L;MTHFD1;EIF4A3;TGFBR1
cytoplasmic sequestering of protein (GO:0051220)	5/15	0.340501	1	0	0	1.29149	1.39137	LATS1;YWHAB;MXI1;GOPC;PKD2
negative regulation of anoikis (GO:2000811)	5/15	0.340501	1	0	0	1.29149	1.39137	ITGB1;PIK3CA;PTRH2;BCL2;PTK2
regulation of cell junction assembly (GO:1901888)	5/15	0.340501	1	0	0	1.29149	1.39137	TJP1;RAP1B;OCLN;RAP1A;CBFB
atrioventricular valve morphogenesis (GO:0003181)	5/15	0.340501	1	0	0	1.29149	1.39137	ACVR1;EFNA1;TGFB2;BMPR2;BMPR1A
negative regulation of adherens junction organization (GO:1903392)	5/15	0.340501	1	0	0	1.29149	1.39137	RCC2;RDX;PTEN;THBS1;PHLDB2
regulation of DNA methylation (GO:0044030)	3/8	0.341727	1	0	0	1.45293	1.56007	MECP2;MPHOSPH8;GRHL2
peptidyl-cysteine modification (GO:0018198)	3/8	0.341727	1	0	0	1.45293	1.56007	CHCHD4;TMX3;PARK7
regulation of establishment of protein localization to mitochondrion (GO:1903747)	3/8	0.341727	1	0	0	1.45293	1.56007	DNAJA1;HAX1;ATPIF1
DNA recombinase assembly (GO:0000730)	3/8	0.341727	1	0	0	1.45293	1.56007	RAD51C;RAD51;XRCC2
phenol-containing compound biosynthetic process (GO:0046189)	3/8	0.341727	1	0	0	1.45293	1.56007	MOXD1;TRPC1;TYRP1
DNA repair complex assembly (GO:0090735)	3/8	0.341727	1	0	0	1.45293	1.56007	RAD51C;RAD51;XRCC2
isoprenoid metabolic process (GO:0006720)	3/8	0.341727	1	0	0	1.45293	1.56007	GGPS1;PDSS1;HMGCR
plasma membrane to endosome transport (GO:0048227)	3/8	0.341727	1	0	0	1.45293	1.56007	USP6NL;COMMD1;RAB11A
deadenylation-dependent decapping of nuclear-transcribed mRNA (GO:0000290)	3/8	0.341727	1	0	0	1.45293	1.56007	LSM1;DCPS;DCP2
lung epithelium development (GO:0060428)	3/8	0.341727	1	0	0	1.45293	1.56007	ERRFI1;WNT7B;GRHL2
negative regulation of establishment of protein localization (GO:1904950)	3/8	0.341727	1	0	0	1.45293	1.56007	DNAJA1;SNX12;TERF1
protein localization to endosome (GO:0036010)	3/8	0.341727	1	0	0	1.45293	1.56007	ACAP2;TMEM30A;PACSIN2
regulation of aspartic-type endopeptidase activity involved in amyloid precursor protein catabolic process (GO:1902959)	3/8	0.341727	1	0	0	1.45293	1.56007	EFNA1;ROCK2;PICALM
negative regulation of mRNA polyadenylation (GO:1900364)	3/8	0.341727	1	0	0	1.45293	1.56007	RNF20;CTR9;ZC3H14
late endosome to vacuole transport via multivesicular body sorting pathway (GO:0032511)	3/8	0.341727	1	0	0	1.45293	1.56007	LEPROTL1;SNF8;VPS36
double-strand break repair via synthesis-dependent strand annealing (GO:0045003)	3/8	0.341727	1	0	0	1.45293	1.56007	RAD51C;RAD51;XRCC2
heterochromatin assembly (GO:0031507)	3/8	0.341727	1	0	0	1.45293	1.56007	HELLS;HMGA1;HMGA2
monocyte activation (GO:0042117)	3/8	0.341727	1	0	0	1.45293	1.56007	CSF1;ADAM9;ADAM10
asymmetric protein localization (GO:0008105)	3/8	0.341727	1	0	0	1.45293	1.56007	PARD3;SHROOM2;GOPC
regulation of ERAD pathway (GO:1904292)	3/8	0.341727	1	0	0	1.45293	1.56007	USP25;ATXN3;UBXN1
positive regulation of TORC1 signaling (GO:1904263)	3/8	0.341727	1	0	0	1.45293	1.56007	RRAGA;SEH1L;LARS
ribosome disassembly (GO:0032790)	3/8	0.341727	1	0	0	1.45293	1.56007	MCTS1;MTIF2;DENR
depyrimidination (GO:0045008)	3/8	0.341727	1	0	0	1.45293	1.56007	MBD4;TDG;UNG
negative regulation of telomerase activity (GO:0051974)	3/8	0.341727	1	0	0	1.45293	1.56007	PIF1;PINX1;TERF1
response to vitamin D (GO:0033280)	3/8	0.341727	1	0	0	1.45293	1.56007	CYP27B1;CYP24A1;SPP1
polyol biosynthetic process (GO:0046173)	3/8	0.341727	1	0	0	1.45293	1.56007	CYP27B1;PPIP5K2;ACER3
regulation of cardiac muscle cell action potential involved in regulation of contraction (GO:0098909)	3/8	0.341727	1	0	0	1.45293	1.56007	CAMK2D;AKAP9;ATP2A2
negative regulation of double-strand break repair via homologous recombination (GO:2000042)	3/8	0.341727	1	0	0	1.45293	1.56007	INSL6;HELB;POLK
regulation of stress-activated protein kinase signaling cascade (GO:0070302)	3/8	0.341727	1	0	0	1.45293	1.56007	NBR1;FAS;MAPK1
positive regulation of extracellular matrix assembly (GO:1901203)	3/8	0.341727	1	0	0	1.45293	1.56007	SMAD3;PHLDB2;CLASP1
sulfur amino acid catabolic process (GO:0000098)	3/8	0.341727	1	0	0	1.45293	1.56007	MTRR;CTH;BLMH
protein lipoylation (GO:0009249)	3/8	0.341727	1	0	0	1.45293	1.56007	GCSH;LIPT1;LIAS
amyloid fibril formation (GO:1990000)	3/8	0.341727	1	0	0	1.45293	1.56007	FKBP1A;MDM2;RIPK1
positive regulation of transforming growth factor beta production (GO:0071636)	3/8	0.341727	1	0	0	1.45293	1.56007	ATP6AP2;PTGS2;THBS1
positive regulation of DNA recombination (GO:0045911)	3/8	0.341727	1	0	0	1.45293	1.56007	INSL6;WRN;TFRC
regulation of muscle organ development (GO:0048634)	3/8	0.341727	1	0	0	1.45293	1.56007	MTPN;CENPF;SFMBT1
DNA damage induced protein phosphorylation (GO:0006975)	3/8	0.341727	1	0	0	1.45293	1.56007	CHEK2;CHEK1;ATM
Fc receptor signaling pathway (GO:0038093)	50/183	0.345998	1	0	0	1.0586	1.12351	UBE2D2;PIK3CB;PSMD9;PPP3CA;PSMD6;PPP3CB;PSMD7;PSMD5;PSMD2;PSMD1;IKBKG;VAV3;MAP2K4;CHUK;PSMA5;PSMA6;PSMA3;PSMA4;PIK3CA;PSMA1;PSMA2;PSME4;PSME1;PSME2;SOS1;PSMD10;PSMD12;PSMD11;PSMD14;CUL1;BCL10;PSMA7;NRAS;PAK1;PSMB1;PLCG2;MAPK1;RPS27A;PAK2;MAPK10;FER;PSMC5;PSMC6;PSMC3;PSMC1;PSMC2;UBE2N;TAB3;TAB2;KRAS
glycoprotein metabolic process (GO:0009100)	14/48	0.348462	1	0	0	1.13005	1.19133	EDEM3;MGEA5;MANBA;FBXO2;PARK7;HIF1A;ERP44;FUT8;MAN1A2;MAN2A1;MGAT4B;ST3GAL4;AGA;MAN1B1
regulation of NF-kappaB import into nucleus (GO:0042345)	8/26	0.350134	1	0	0	1.19214	1.25108	PPM1A;CYLD;PPM1B;IL23A;SPHK1;TLR4;RHOA;TLR3
positive regulation of release of cytochrome c from mitochondria (GO:0090200)	8/26	0.350134	1	0	0	1.19214	1.25108	MOAP1;BCL2L11;FAM162A;PDCD5;PLAUR;MFF;BID;DNM1L
positive regulation of hydrolase activity (GO:0051345)	47/172	0.351776	1	0	0	1.05872	1.10611	USP6NL;ITGB1;GSK3B;VCP;RGS16;RAP1GDS1;HMGB2;TOR1AIP2;SNX13;DNAJC24;F11R;ARHGAP21;WRN;RAP1A;FNTA;LARS;RPS3;SNX9;SRGAP2;ECT2;EVI5;S100A10;GABARAPL2;CDKL5;CCL20;F2R;RHOC;MUT;RHOA;MSH6;MSH2;ALS2;MSH3;TNNT2;DNAJB11;DNAJC10;RGN;PLXNB1;ITGA6;DNAJC9;SSBP1;CALM2;RAPGEF6;RAB3GAP1;PICALM;EZH2;LIMS1
activation of protein kinase activity (GO:0032147)	63/233	0.357163	1	0	0	1.0476	1.07857	KIF14;PARK7;PIK3CB;SLK;NEK1;IKBKG;JAK2;PRKACB;MAP3K5;MAP2K4;CARD10;F2R;AXIN1;ZFP91;FRS2;NRG1;OXSR1;DUSP9;TIRAP;TGFBR1;TOM1L1;KARS;ADAM9;TLR4;CRK;TLR3;PRKAA1;MAPKAP1;STK39;TGFA;TANK;THBS1;STK3;PAK1;RAP1A;PRKAR2A;MAPK1;RICTOR;CLSPN;RPS27A;MAP4K5;PAK3;ECT2;PAK2;PIBF1;MAP4K3;MAP4K4;MAP3K2;OSBPL8;TGFB2;GADD45B;NEK4;GADD45A;EIF2AK2;TNFRSF10B;TPX2;CCDC88A;STK24;TAOK1;UBE2N;CDK1;TAB3;TAB2
regulation of anatomical structure morphogenesis (GO:0022603)	23/82	0.361124	1	0	0	1.08674	1.10688	WARS;VASH2;TNFAIP3;RC3H1;EFNA5;LARP4;MARCH5;CAMSAP1;ZMYM1;ZMYM2;FMNL2;GPNMB;GDNF;ZMYM4;ZMYM6;CTNNB1;PHIP;PHLDB2;PDZD8;CLASP1;HTATIP2;SH3D19;EPHA2
positive regulation of transforming growth factor beta receptor signaling pathway (GO:0030511)	6/19	0.3631	1	0	0	1.22352	1.23952	SDCBP;ING2;HSP90AB1;SNW1;CITED2;THBS1
protein import into mitochondrial matrix (GO:0030150)	6/19	0.3631	1	0	0	1.22352	1.23952	GRPEL1;GRPEL2;TIMM17A;TOMM7;TOMM20;TOMM22
protein ADP-ribosylation (GO:0006471)	6/19	0.3631	1	0	0	1.22352	1.23952	PARP4;PARP1;TNKS2;PARP2;TNKS;PARP9
negative regulation of phosphate metabolic process (GO:0045936)	6/19	0.3631	1	0	0	1.22352	1.23952	ANKLE2;CDKN1B;PRKRIP1;INHBA;DYNLL1;SIRT1
endoplasmic reticulum mannose trimming (GO:1904380)	6/19	0.3631	1	0	0	1.22352	1.23952	RNF139;DERL2;MAN1B1;MARCH6;RPS27A;UGGT1
positive regulation of pri-miRNA transcription from RNA polymerase II promoter (GO:1902895)	6/19	0.3631	1	0	0	1.22352	1.23952	TGFB2;SMAD3;HIF1A;TEAD1;GNL3;APLN
positive regulation of transcription regulatory region DNA binding (GO:2000679)	6/19	0.3631	1	0	0	1.22352	1.23952	FOXC1;GTF2B;HMGA2;CTNNB1;PARK7;POU4F1
positive regulation of cellular response to transforming growth factor beta stimulus (GO:1903846)	6/19	0.3631	1	0	0	1.22352	1.23952	SDCBP;ING2;HSP90AB1;SNW1;CITED2;THBS1
activin receptor signaling pathway (GO:0032924)	6/19	0.3631	1	0	0	1.22352	1.23952	ACVR1;SMAD2;SMAD3;INHBA;TGFBR1;ACVR2A
histone methylation (GO:0016571)	6/19	0.3631	1	0	0	1.22352	1.23952	PRMT5;FBL;PRMT7;PRMT1;SETD6;EZH2
negative regulation of cell junction assembly (GO:1901889)	6/19	0.3631	1	0	0	1.22352	1.23952	ROCK1;ROCK2;RCC2;PTEN;THBS1;PHLDB2
negative regulation of double-strand break repair (GO:2000780)	6/19	0.3631	1	0	0	1.22352	1.23952	INSL6;HELB;UBR5;HMGA2;TRIP12;POLK
protein localization to lysosome (GO:0061462)	9/30	0.36474	1	0	0	1.16234	1.1723	AP3M1;ZFYVE16;RNF128;SNX16;LARS;NEDD4;NCOA4;SH3BP4;GCC2
regulation of cell migration involved in sprouting angiogenesis (GO:0090049)	9/30	0.36474	1	0	0	1.16234	1.1723	FOXC2;CARD10;ANXA1;PDCD10;AKT3;PIK3C2A;PTGS2;THBS1;RHOA
negative regulation of transferase activity (GO:0051348)	9/30	0.36474	1	0	0	1.16234	1.1723	EIF4A2;GSK3B;PIF1;CDKN1B;BAG5;PINX1;HNRNPU;PARK7;TERF1
protein polymerization (GO:0051258)	13/45	0.372013	1	0	0	1.11929	1.10679	GPX4;ARL6;UBE2C;COBL;CKAP5;UBE2S;TRPV4;CENPJ;MICALL2;CHMP2A;WASF1;JAK2;UBE2K
regulation of double-strand break repair via nonhomologous end joining (GO:2001032)	4/12	0.376415	1	0	0	1.29149	1.26187	INSL6;KDM4D;HMGA2;PARP9
establishment of apical/basal cell polarity (GO:0035089)	4/12	0.376415	1	0	0	1.29149	1.26187	CDC42;MSN;MYO9A;RHOA
pyrimidine nucleoside salvage (GO:0043097)	4/12	0.376415	1	0	0	1.29149	1.26187	UCK2;UPRT;TK1;DCK
positive regulation of keratinocyte differentiation (GO:0045618)	4/12	0.376415	1	0	0	1.29149	1.26187	MBD4;CYP27B1;FOXC1;NME2
negative regulation of substrate adhesion-dependent cell spreading (GO:1900025)	4/12	0.376415	1	0	0	1.29149	1.26187	RCC2;AP1AR;EFNA5;GBP1
polyamine metabolic process (GO:0006595)	4/12	0.376415	1	0	0	1.29149	1.26187	SMOX;ODC1;SMS;SAT1
histone H3 deacetylation (GO:0070932)	4/12	0.376415	1	0	0	1.29149	1.26187	HDAC2;HDAC1;SMARCAD1;SIRT1
regulation of protein localization to cell periphery (GO:1904375)	4/12	0.376415	1	0	0	1.29149	1.26187	STX8;STX7;GBP1;APPL1
positive regulation of peptidase activity (GO:0010952)	4/12	0.376415	1	0	0	1.29149	1.26187	KARS;PSME1;PSME2;TANK
pyrimidine-containing compound salvage (GO:0008655)	4/12	0.376415	1	0	0	1.29149	1.26187	UCK2;UPRT;TK1;DCK
endosome transport via multivesicular body sorting pathway (GO:0032509)	4/12	0.376415	1	0	0	1.29149	1.26187	VCP;VPS4B;LEPROTL1;SNF8
positive regulation of mRNA metabolic process (GO:1903313)	4/12	0.376415	1	0	0	1.29149	1.26187	PNPT1;CNOT7;CNOT1;RC3H1
protein kinase C-activating G-protein coupled receptor signaling pathway (GO:0007205)	4/12	0.376415	1	0	0	1.29149	1.26187	PRKD3;PARD3;F2R;PICK1
positive regulation of neuron migration (GO:2001224)	4/12	0.376415	1	0	0	1.29149	1.26187	NIPBL;PLAA;ARHGEF2;KIF20B
negative regulation of fatty acid metabolic process (GO:0045922)	4/12	0.376415	1	0	0	1.29149	1.26187	ERLIN1;TRIB3;ERLIN2;BRCA1
microtubule anchoring (GO:0034453)	4/12	0.376415	1	0	0	1.29149	1.26187	BCCIP;GCC2;BICD1;CLASP1
positive regulation of SMAD protein import into nucleus (GO:0060391)	4/12	0.376415	1	0	0	1.29149	1.26187	NUP93;SMAD3;TGFBR1;BMPR1A
cardiac right ventricle morphogenesis (GO:0003215)	4/12	0.376415	1	0	0	1.29149	1.26187	TGFB2;JAG1;GATA4;BMPR1A
regulation of transcription of nuclear large rRNA transcript from RNA polymerase I promoter (GO:1901836)	4/12	0.376415	1	0	0	1.29149	1.26187	DDX11;NCL;MARS;NOL11
regulation of protein glycosylation (GO:0060049)	4/12	0.376415	1	0	0	1.29149	1.26187	WARS;CHORDC1;ALG10B;FKTN
regulation of IRE1-mediated unfolded protein response (GO:1903894)	4/12	0.376415	1	0	0	1.29149	1.26187	COPS5;BCL2L11;HSPA5;DNAJB9
endochondral bone morphogenesis (GO:0060350)	4/12	0.376415	1	0	0	1.29149	1.26187	FOXC1;BMPR2;TRPV4;SCX
histone arginine methylation (GO:0034969)	4/12	0.376415	1	0	0	1.29149	1.26187	PRMT5;PRMT7;PRDM4;PRMT1
regulation of actomyosin structure organization (GO:0110020)	4/12	0.376415	1	0	0	1.29149	1.26187	CDC42;ROCK1;ROCK2;ALMS1
cellular macromolecular complex assembly (GO:0034622)	10/34	0.377206	1	0	0	1.13955	1.11102	SHQ1;CTAGE5;AXIN1;MIA3;RPL38;SNX9;DNAJB14;TCF4;TANK;PICALM
positive regulation of mitochondrion organization (GO:0010822)	35/128	0.377879	1	0	0	1.05942	1.03101	USP36;GSK3B;GLS2;PDCD5;UBE2D3;NKAP;HTRA2;PARK7;MFF;WDR46;NPEPPS;CYB5R1;UBL5;BCL2L11;FAM162A;RUVBL1;MICALL2;PLAGL2;VPS35;DNM1L;BID;BOK;SH3GLB1;CDKL2;MOAP1;FBXW7;CSNK2A2;PLAUR;WDR75;NRG1;WBP11;MARCH5;TOMM7;RHOU;SAE1
positive regulation of cell cycle G1/S phase transition (GO:1902808)	7/23	0.380575	1	0	0	1.17919	1.13918	DDX3X;CDC45;STXBP4;RDX;FAM83D;PHB2;CDC73
rRNA methylation (GO:0031167)	7/23	0.380575	1	0	0	1.17919	1.13918	FBL;EMG1;DIMT1;NOP2;TFB2M;TFB1M;FTSJ3
protein localization to Golgi apparatus (GO:0034067)	7/23	0.380575	1	0	0	1.17919	1.13918	ARL5B;ARL1;VPS13A;GCC2;CSNK1D;ARL5A;OPTN
autophagosome maturation (GO:0097352)	7/23	0.380575	1	0	0	1.17919	1.13918	GABARAPL2;VCP;TSG101;STX17;SNX14;LAMP2;SNAP29
regulation of monooxygenase activity (GO:0032768)	7/23	0.380575	1	0	0	1.17919	1.13918	LYPLA1;HSP90AA1;SPR;GDNF;DDAH1;ZDHHC21;WASL
negative regulation of transcription factor import into nucleus (GO:0042992)	7/23	0.380575	1	0	0	1.17919	1.13918	GSK3B;PPM1A;CYLD;PPM1B;RAB23;MXI1;PKD2
establishment of protein localization to membrane (GO:0090150)	23/83	0.386169	1	0	0	1.07365	1.02155	PRKCI;ZDHHC20;ARL6;GOLPH3L;ZDHHC23;CHM;ZDHHC6;ZDHHC21;ZDHHC2;RAB11A;RAB10;SDCBP;GOLGA4;RAB31;PARD3;ATG4C;EXOC4;BID;GOLGA7;OPTN;BLZF1;RAB3GAP1;SEC63
positive regulation of innate immune response (GO:0045089)	11/38	0.388051	1	0	0	1.12156	1.06169	PLSCR1;RPS19;POLR3B;DHX9;POLR3D;POLR3F;POLR3G;DDX60;UBE2K;TLR3;PUM2
regulation of ossification (GO:0030278)	11/38	0.388051	1	0	0	1.12156	1.06169	ACVR1;CYP27B1;DDX5;TGFB2;BMPR2;CHSY1;NBR1;TXLNG;RBPJ;PTK2;DDR2
negative regulation of cysteine-type endopeptidase activity involved in apoptotic process (GO:0043154)	19/68	0.388219	1	0	0	1.08257	1.02431	YWHAE;IGBP1;USP47;DDX3X;ARL6IP1;CSNK2A1;PLAUR;XIAP;TNFRSF10B;PARK7;TRIAP1;THBS1;SH3RF1;RPS6KA3;DNAJB6;BIRC5;FNIP1;PAK2;CD44
T cell receptor signaling pathway (GO:0050852)	44/163	0.393517	1	0	0	1.04587	0.975408	PSMD10;DENND1B;PSMD12;PSMD11;PSMD14;UBE2D2;CUL1;BCL10;PIK3CB;PSMA7;PSMD9;PSMD6;PAK1;PSMD7;PSMD5;PSMD2;PSMB1;PLCG2;PSMD1;IKBKG;PAK3;RPS27A;PAK2;CD276;NCK1;EIF2B3;CHUK;PSMA5;PSMA6;PSMA3;PSMC5;PSMA4;PSMC6;PIK3CA;PSMA1;PSMC3;PSMA2;PSMC1;PSME4;PSMC2;PSME1;UBE2N;PSME2;TAB2
negative regulation of small GTPase mediated signal transduction (GO:0051058)	8/27	0.394722	1	0	0	1.14799	1.06714	TGFB2;MAPKAP1;RASA1;RASA2;RASAL2;CGNL1;ARHGAP12;CD2AP
regulation of extrinsic apoptotic signaling pathway in absence of ligand (GO:2001239)	8/27	0.394722	1	0	0	1.14799	1.06714	IL1A;CSF2;EYA1;GDNF;UNC5B;BCL2;HTRA2;INHBA
negative regulation of cell-matrix adhesion (GO:0001953)	8/27	0.394722	1	0	0	1.14799	1.06714	JAG1;RCC2;RASA1;PTEN;CASK;SEMA3E;THBS1;PHLDB2
regulation of protein transport (GO:0051223)	8/27	0.394722	1	0	0	1.14799	1.06714	DNAJA1;HSPA8;SCFD1;CHORDC1;SNX12;STXBP5;ARFIP1;GAPVD1
regulation of vascular endothelial growth factor production (GO:0010574)	8/27	0.394722	1	0	0	1.14799	1.06714	CCBE1;IL1A;SARS;GATA4;BRCA1;PTGS2;HIF1A;ATF4
regulation of protein localization to cell surface (GO:2000008)	8/27	0.394722	1	0	0	1.14799	1.06714	HSP90AB1;BDNF;LEPROTL1;CTNNB1;GOPC;STX3;COMMD1;PICALM
regulation of cilium assembly (GO:1902017)	8/27	0.394722	1	0	0	1.14799	1.06714	DYNC2LI1;CYLD;CCDC88A;IFT88;TCTEX1D2;CEP97;BBS4;ATG5
mitochondrion organization (GO:0007005)	45/167	0.396952	1	0	0	1.04402	0.96461	PIF1;TIMM9;PARK7;TFB1M;MFF;TOMM20;PHB2;TOMM22;IFIT2;MTM1;HSPD1;RHOT1;SAMM50;PITRM1;OPA1;AKT3;LONP1;TIMM17A;MFN1;MYH14;DNM1L;BID;GABPA;BNIP3L;CXADR;PNPT1;PARP1;NUBPL;TIMM22;TFB2M;PPRC1;SUPV3L1;IMMP1L;DNAJA3;TOMM7;YME1L1;TFAM;CYCS;MTFR1;NDUFS1;HAP1;SSBP1;FXN;SLC25A36;TOMM5
peptidyl-threonine dephosphorylation (GO:0035970)	5/16	0.399119	1	0	0	1.21077	1.11209	PPP2CB;PPM1A;PPM1B;DUSP18;PPM1G
embryonic digit morphogenesis (GO:0042733)	5/16	0.399119	1	0	0	1.21077	1.11209	HDAC2;HDAC1;OSR1;WNT7A;GLI3
cytoplasmic sequestering of transcription factor (GO:0042994)	5/16	0.399119	1	0	0	1.21077	1.11209	PSMD10;FAF1;MXI1;G3BP2;PKD2
positive regulation of cardiac muscle hypertrophy (GO:0010613)	5/16	0.399119	1	0	0	1.21077	1.11209	MTPN;CAMK2D;EDN1;PARP1;PRKCA
neuron apoptotic process (GO:0051402)	5/16	0.399119	1	0	0	1.21077	1.11209	BCL2;LIG4;NAE1;BID;CIT
peptidyl-lysine methylation (GO:0018022)	5/16	0.399119	1	0	0	1.21077	1.11209	SETD2;SETD3;SETD6;SETD7;SMYD2
dendritic spine morphogenesis (GO:0060997)	5/16	0.399119	1	0	0	1.21077	1.11209	CDC42;PTEN;WNT7A;WASL;PAK3
positive regulation of cilium assembly (GO:0045724)	5/16	0.399119	1	0	0	1.21077	1.11209	CCDC88A;CEP135;SEPT7;HAP1;BBS4
mRNA transcription from RNA polymerase II promoter (GO:0042789)	5/16	0.399119	1	0	0	1.21077	1.11209	MBD4;DDIT3;SUPT6H;HIF1A;ATF4
positive regulation of cell migration involved in sprouting angiogenesis (GO:0090050)	5/16	0.399119	1	0	0	1.21077	1.11209	FOXC2;ANXA1;AKT3;PIK3C2A;PTGS2
cardiac epithelial to mesenchymal transition (GO:0060317)	5/16	0.399119	1	0	0	1.21077	1.11209	TGFB2;PDCD4;HAS2;RBPJ;TGFBR1
regulation of necroptotic process (GO:0060544)	5/16	0.399119	1	0	0	1.21077	1.11209	CASP8;RIPK1;ARHGEF2;RPS27A;TANK
positive regulation of leukocyte activation (GO:0002696)	5/16	0.399119	1	0	0	1.21077	1.11209	TSLP;KARS;THBS1;TLR4;HSPD1
myoblast differentiation (GO:0045445)	5/16	0.399119	1	0	0	1.21077	1.11209	DDX5;JAG1;SOX15;ANKRD1;NRG1
mesenchyme development (GO:0060485)	5/16	0.399119	1	0	0	1.21077	1.11209	BMPR2;HMGA2;GATA4;PKD2;TGFBR1
neural tube development (GO:0021915)	5/16	0.399119	1	0	0	1.21077	1.11209	TRIM71;STIL;ARL13B;PKD2;GRHL2
positive regulation of JNK cascade (GO:0046330)	21/76	0.400525	1	0	0	1.07058	0.979555	EDN1;GADD45B;GADD45A;WNT7B;DUSP19;AXIN1;WNT7A;HMGB1;TPD52L1;TANK;TIRAP;CTGF;IL1A;SDCBP;PAK1;TAOK1;DVL2;RPS3;RIPK1;ARHGEF5;MAP3K5
actin cytoskeleton reorganization (GO:0031532)	17/61	0.403744	1	0	0	1.07977	0.979324	RALA;ANXA1;CXADR;PARVA;CDC42BPA;RHOA;MKLN1;PAK1;FER;CTTN;PTK7;TRPV4;MICALL2;MYH9;PIP5K1A;RICTOR;EZR
positive regulation of cell proliferation (GO:0008284)	112/424	0.405215	1	0	0	1.02344	0.924515	CSF3;CSF1;RTKN2;SCX;HNRNPU;RBPJ;CCAR1;IGF1R;HMGN5;SOX15;MYC;PRKCI;RPS9;TIPIN;CSNK2A1;RPL23;OSR1;F2R;ADAM10;LIG4;TIAM1;S100A6;PHIP;KIF20B;EPHA1;DHX9;CUL3;EIF5A2;COX17;NOP2;TGFA;EFNB2;SDCBP;PDCD10;PDGFC;SSR1;MCTS1;SRPK2;TGFB2;TSLP;LIF;HMGA2;CDC7;UBE2A;PTK2;FOSL1;CNOT6;FER;CNOT7;CDK6;GDNF;CDK4;IL7;CDK2;ACER3;MDM2;SPDYA;FGFR1OP;CALR;NES;BMPR1A;BNC1;CDCA7L;PTEN;KIF14;ASH2L;LAMC2;FOXM1;BMI1;CYR61;CXCL5…
protein complex disassembly (GO:0043241)	13/46	0.406202	1	0	0	1.09496	0.986453	GSK3B;GABARAPL2;VCP;TSG101;STX17;CSNK1A1;AXIN1;APC;SNX14;LAMP2;DVL2;CTNNB1;SNAP29
positive regulation of protein localization to cell periphery (GO:1904377)	13/46	0.406202	1	0	0	1.09496	0.986453	ITGB1;GPSM2;PRKCI;ITGA3;ARHGEF16;EFCAB7;DLG1;CNPY4;KIF5B;STX3;SQSTM1;PLS1;EPHA2
negative regulation of extrinsic apoptotic signaling pathway via death domain receptors (GO:1902042)	9/31	0.406559	1	0	0	1.12485	1.01239	CASP8;TNFAIP3;TNFRSF10B;FAS;RIPK1;PARK7;BRCA1;ARHGEF2;TANK
regulation of protein autophosphorylation (GO:0031952)	9/31	0.406559	1	0	0	1.12485	1.01239	RAP2C;TOM1L1;ERRFI1;RAD50;GPNMB;ARTN;PDGFC;CHORDC1;CALM2
liver development (GO:0001889)	9/31	0.406559	1	0	0	1.12485	1.01239	CCDC39;CITED2;CEBPG;COBL;PKD2;MET;E2F7;AURKA;E2F8
gene silencing by miRNA (GO:0035195)	9/31	0.406559	1	0	0	1.12485	1.01239	TRIM71;CNOT6;CNOT7;ZC3H7A;CNOT1;XPO5;DICER1;RAN;PUM2
positive regulation of protein modification by small protein conjugation or removal (GO:1903322)	18/65	0.410193	1	0	0	1.07293	0.956117	PSMD10;FANCI;RWDD3;WDR48;FBXW7;PHF23;SPHK1;CUL3;AXIN1;XIAP;BRCA1;COMMD1;BCL10;SENP2;TANK;GNL3;FKBP1A;CDK5RAP3
cellular response to reactive oxygen species (GO:0034614)	18/65	0.410193	1	0	0	1.07293	0.956117	CHUK;PLEKHA1;MPV17L;TNFAIP3;MTR;PARK7;PTPRK;PKD2;SIRT1;MAPK13;SETX;FER;CDK2;RPS3;MAPK1;ECT2;FXN;MAP3K5
cytoskeleton organization (GO:0007010)	34/126	0.414674	1	0	0	1.04549	0.920308	RTKN2;RHOBTB3;CAMSAP1;FGD1;FGD3;CDC42;FGD4;ZMYM1;ZMYM2;FGD6;ZMYM4;PPP2R3C;ZMYM6;PACSIN2;FLNB;PDZD8;SH3D19;PRKCI;DST;KRT13;PRPF40A;LARP4;PTK2;KLHL20;ANLN;ARHGAP10;FMNL2;ABI2;KRT16;PFDN1;PHIP;RHOU;EZR;BRWD3
positive regulation of dendritic spine development (GO:0060999)	6/20	0.415734	1	0	0	1.16234	1.0202	FMR1;CAPRIN1;DLG5;PSEN1;LLPH;LRP8
regulation of anoikis (GO:2000209)	6/20	0.415734	1	0	0	1.16234	1.0202	ITGB1;MYBBP1A;PIK3CA;PTRH2;BCL2;PTK2
regulation of cell development (GO:0060284)	6/20	0.415734	1	0	0	1.16234	1.0202	YAP1;RPS19;RHEB;DOCK7;HMGB2;CTNNB1
negative regulation of protein depolymerization (GO:1901880)	6/20	0.415734	1	0	0	1.16234	1.0202	NAV3;APC;ARHGEF2;CAMSAP1;CLASP1;TTBK2
steroid hormone mediated signaling pathway (GO:0043401)	6/20	0.415734	1	0	0	1.16234	1.0202	MBD4;MED13;THRAP3;ABHD2;MED4;MED17
mitochondrial RNA metabolic process (GO:0000959)	6/20	0.415734	1	0	0	1.16234	1.0202	SUPV3L1;PNPT1;FASTKD1;FASTKD5;TFAM;TFB2M
cell projection assembly (GO:0030031)	6/20	0.415734	1	0	0	1.16234	1.0202	CDC42;CYFIP1;NCKAP1;RHOBTB3;PARVA;RHOU
autophagy of nucleus (GO:0044804)	6/20	0.415734	1	0	0	1.16234	1.0202	BECN1;ATG9B;ATG4C;TRAPPC8;ATG2B;ATG5
regulation of protein targeting to mitochondrion (GO:1903214)	24/88	0.416493	1	0	0	1.05667	0.925525	SH3GLB1;CDKL2;USP36;FBXW7;GLS2;UBE2D3;ATPIF1;CSNK2A2;NKAP;WDR75;HTRA2;NRG1;WBP11;WDR46;NPEPPS;UBL5;CYB5R1;HAX1;RUVBL1;MICALL2;TOMM7;PLAGL2;RHOU;SAE1
negative regulation of cell-substrate adhesion (GO:0010812)	10/35	0.416708	1	0	0	1.10699	0.969025	JAG1;RCC2;RASA1;CASK;SEMA3E;AP1AR;EFNA5;THBS1;GBP1;RHOA
protein kinase B signaling (GO:0043491)	10/35	0.416708	1	0	0	1.10699	0.969025	SETX;CDKN1B;CREB1;CHUK;MKRN1;PTEN;TYRO3;MDM2;THEM4;EPHA2
positive regulation of NIK/NF-kappaB signaling (GO:1901224)	10/35	0.416708	1	0	0	1.10699	0.969025	CARD10;RPS3;PDCD4;EIF2AK2;TNFRSF10B;ZFP91;TANK;TIRAP;TLR3;LIMS1
regulation of protein binding (GO:0043393)	30/111	0.42006	1	0	0	1.04715	0.908256	GSK3B;CSF3;KDM1A;ROCK1;USP33;RPL11;NMD3;PARK7;PSEN1;AURKB;IFIT2;STK3;AURKA;PRMT7;DDX11;AKTIP;PLK1;NRG1;FKBP1A;TIAM1;GNL3L;BCL2;TRIB3;MITD1;AIDA;NES;CRK;GAS8;RAN;TAF1
cell morphogenesis involved in differentiation (GO:0000904)	15/54	0.421013	1	0	0	1.07624	0.931047	YTHDF2;ACTN1;KIF14;LAMB1;PARVA;GRHL2;EFNA1;FER;ARL13B;TYRO3;MICALL2;ITGAV;EPHA1;SRGAP2;EPHA2
membrane fusion (GO:0061025)	15/54	0.421013	1	0	0	1.07624	0.931047	NAPB;HACE1;GCA;UBXN2A;USO1;VASH2;MFF;NSFL1C;RABEP1;OPA1;CHORDC1;VPS41;MFN1;DNM1L;SNAP29
canonical Wnt signaling pathway (GO:0060070)	20/73	0.421841	1	0	0	1.0615	0.916207	GSK3B;WNT10A;FZD3;UBE2B;RYK;CSNK1A1;WNT7B;FZD6;PTEN;AXIN1;WNT7A;PSEN1;NR4A2;APC;PTK7;MYC;DVL2;CTNNB1;RAB5A;SCYL2
L-fucose metabolic process (GO:0042354)	3/9	0.422021	1	0	0	1.29149	1.11417	FUT8;FUT10;FUT1
neuron maturation (GO:0042551)	3/9	0.422021	1	0	0	1.29149	1.11417	EPHA8;PICK1;RND1
positive regulation of coagulation (GO:0050820)	3/9	0.422021	1	0	0	1.29149	1.11417	F2R;ENPP4;THBS1
regulation of microtubule-based movement (GO:0060632)	3/9	0.422021	1	0	0	1.29149	1.11417	IGBP1;TCTEX1D2;HAP1
embryonic forelimb morphogenesis (GO:0035115)	3/9	0.422021	1	0	0	1.29149	1.11417	NIPBL;OSR1;WNT7A
nuclear migration (GO:0007097)	3/9	0.422021	1	0	0	1.29149	1.11417	DOCK7;HOOK3;PAFAH1B1
Cdc42 protein signal transduction (GO:0032488)	3/9	0.422021	1	0	0	1.29149	1.11417	CDC42;RHOBTB3;RHOU
negative regulation of tyrosine phosphorylation of STAT protein (GO:0042532)	3/9	0.422021	1	0	0	1.29149	1.11417	INPP5F;PIBF1;PTPN2
maintenance of protein localization in endoplasmic reticulum (GO:0035437)	3/9	0.422021	1	0	0	1.29149	1.11417	PDIA3;PDIA2;HSPA5
response to dopamine (GO:1903350)	3/9	0.422021	1	0	0	1.29149	1.11417	MAPK1;GABPA;ATF4
response to leucine (GO:0043201)	3/9	0.422021	1	0	0	1.29149	1.11417	LARS;UBR2;UBR1
heterochromatin organization (GO:0070828)	3/9	0.422021	1	0	0	1.29149	1.11417	HP1BP3;SETD7;HMGA2
positive regulation of phosphorylation of RNA polymerase II C-terminal domain (GO:1901409)	3/9	0.422021	1	0	0	1.29149	1.11417	CCNK;CCNH;CCNC
protein localization to vacuole (GO:0072665)	3/9	0.422021	1	0	0	1.29149	1.11417	SH3GLB1;RNF128;SH3BP4
regulation of striated muscle tissue development (GO:0016202)	3/9	0.422021	1	0	0	1.29149	1.11417	MTPN;CENPF;SOX15
peptidyl-arginine methylation (GO:0018216)	3/9	0.422021	1	0	0	1.29149	1.11417	PRMT5;PRMT7;PRMT1
negative regulation of protein sumoylation (GO:0033234)	3/9	0.422021	1	0	0	1.29149	1.11417	GNL3L;CTNNB1;PARK7
negative regulation of alcohol biosynthetic process (GO:1902931)	3/9	0.422021	1	0	0	1.29149	1.11417	CYP27B1;ERLIN1;ERLIN2
positive regulation of hemostasis (GO:1900048)	3/9	0.422021	1	0	0	1.29149	1.11417	F2R;ENPP4;THBS1
toll-like receptor 3 signaling pathway (GO:0034138)	3/9	0.422021	1	0	0	1.29149	1.11417	CASP8;RIPK1;TLR3
fucose catabolic process (GO:0019317)	3/9	0.422021	1	0	0	1.29149	1.11417	FUT8;FUT10;FUT1
protein autoprocessing (GO:0016540)	3/9	0.422021	1	0	0	1.29149	1.11417	CASP1;HTRA2;FXN
protein hexamerization (GO:0034214)	3/9	0.422021	1	0	0	1.29149	1.11417	SPAST;MAT2A;YME1L1
mRNA methylation (GO:0080009)	3/9	0.422021	1	0	0	1.29149	1.11417	METTL14;WTAP;TRMT6
negative regulation of chromatin silencing (GO:0031936)	3/9	0.422021	1	0	0	1.29149	1.11417	ATAD2;HMGA1;ASF1A
cellular response to leucine (GO:0071233)	3/9	0.422021	1	0	0	1.29149	1.11417	LARS;UBR2;UBR1
negative regulation of amyloid-beta formation (GO:1902430)	3/9	0.422021	1	0	0	1.29149	1.11417	PRNP;ROCK1;HAP1
positive regulation of protein homooligomerization (GO:0032464)	3/9	0.422021	1	0	0	1.29149	1.11417	BCL2L11;BID;RHOC
positive regulation of vascular endothelial cell proliferation (GO:1905564)	3/9	0.422021	1	0	0	1.29149	1.11417	AKT3;HMGB1;APLN
neuron projection organization (GO:0106027)	3/9	0.422021	1	0	0	1.29149	1.11417	PRNP;PICK1;PSEN1
mitochondrial fragmentation involved in apoptotic process (GO:0043653)	3/9	0.422021	1	0	0	1.29149	1.11417	VPS35;MFF;DNM1L
histone H3-K4 trimethylation (GO:0080182)	3/9	0.422021	1	0	0	1.29149	1.11417	CTR9;BEND3;WDR61
response to vitamin (GO:0033273)	3/9	0.422021	1	0	0	1.29149	1.11417	CYP27B1;CYP24A1;SPP1
ornithine metabolic process (GO:0006591)	3/9	0.422021	1	0	0	1.29149	1.11417	ODC1;ALDH18A1;AZIN1
response to UV-C (GO:0010225)	3/9	0.422021	1	0	0	1.29149	1.11417	WRN;ERCC5;POLH
positive regulation of protein sumoylation (GO:0033235)	3/9	0.422021	1	0	0	1.29149	1.11417	RWDD3;UBE2I;GNL3
negative regulation of mitotic nuclear division (GO:0045839)	3/9	0.422021	1	0	0	1.29149	1.11417	TOM1L1;NME6;CHEK1
cellular response to dopamine (GO:1903351)	3/9	0.422021	1	0	0	1.29149	1.11417	MAPK1;GABPA;ATF4
L-fucose catabolic process (GO:0042355)	3/9	0.422021	1	0	0	1.29149	1.11417	FUT8;FUT10;FUT1
regulation of transcription from RNA polymerase II promoter (GO:0006357)	385/1478	0.424207	1	0	0	1.00925	0.865465	ATF1;ATF2;SCX;HNRNPU;RBPJ;GABPB1;SOX21;ELK3;TBK1;SOX15;MYC;HOXA5;IER2;RPL23;MED8;DICER1;MED4;MED6;MED7;EID1;ZFYVE16;RFX7;DDIT3;TBPL1;ATF6;ATF3;CGGBP1;ATF4;PRKDC;GATA4;WDR61;HIF1A;MTDH;RAD21;MYO6;JAG1;PLK1;NR1D2;SNF8;FOSL2;SETX;FOSL1;HNRNPK;TADA2A;GTF2IRD1;CDK12;EZH2;GMEB1;SETD3;MED19;TCF20;CTCF;EFCAB7;PHF6;MED18;GLI3;MED17;MECP2;TAF7L;NIPBL;MED13;MECOM;NKRF;MED10;IKBKG;TEAD1;TCF19;TEAD4;BRD3;BRD2…
purine ribonucleoside monophosphate biosynthetic process (GO:0009168)	11/39	0.425579	1	0	0	1.0928	0.933583	ATIC;PPAT;IMPDH2;GMPS;ATP5H;ATP5O;PFAS;ADSS;PAICS;GART;SLC25A13
response to light stimulus (GO:0009416)	16/58	0.427503	1	0	0	1.06882	0.908275	ZRANB3;UBE2B;REV1;UBE4B;UBE2A;GTF2H2;MSH6;MAPK10;COPS3;USP1;ERCC8;ERCC5;ERCC6;DTL;MAP4K3;RAD18
regulation of epidermal growth factor-activated receptor activity (GO:0007176)	7/24	0.428739	1	0	0	1.13005	0.95705	ERRFI1;TSG101;GPRC5A;FBXW7;TGFA;SOCS4;SNX6
positive regulation of vascular endothelial growth factor production (GO:0010575)	7/24	0.428739	1	0	0	1.13005	0.95705	CCBE1;IL1A;GATA4;BRCA1;PTGS2;HIF1A;ATF4
regulation of cardiac muscle cell action potential (GO:0098901)	7/24	0.428739	1	0	0	1.13005	0.95705	DSP;CAMK2D;DLG1;CXADR;AKAP9;ATP2A2;DSG2
positive regulation of protein localization to plasma membrane (GO:1903078)	12/43	0.43345	1	0	0	1.08125	0.903899	ITGB1;PRKCI;DLG1;CNPY4;ITGA3;KIF5B;ARHGEF16;STX3;ACSL3;SQSTM1;PLS1;EPHA2
negative regulation of ERBB signaling pathway (GO:1901185)	12/43	0.43345	1	0	0	1.08125	0.903899	CDC42;ERRFI1;RNF115;TSG101;NRG1;STAM;PTPN12;RPS27A;EPS15;STAM2;PTPN2;HBEGF
regulation of actin filament-based process (GO:0032970)	17/62	0.433505	1	0	0	1.06235	0.88797	ROCK1;ROCK2;RHOBTB3;ARHGAP18;RHOC;EFNA5;RND3;RHOD;RHOA;RND1;CDC42;CCDC88A;TAOK1;RHOU;RICTOR;CRK;ARHGEF5
cellular protein catabolic process (GO:0044257)	17/62	0.433505	1	0	0	1.06235	0.88797	BNIP3L;CLTC;HTRA2;UBE2G1;IDE;AP2B1;CLPX;SCPEP1;PSMA6;CASP8;CTSL;CHEK2;RAB12;LONP1;MDM2;YME1L1;RIPK1
Ras protein signal transduction (GO:0007265)	59/223	0.437595	1	0	0	1.02508	0.847192	CYFIP1;NCKAP1;GPSM2;ARHGDIG;PARK7;ARHGAP5;RND3;RAB22A;RND1;EPS8;RASSF1;RAB8B;PHACTR4;USP8;RHOC;RHOD;RHOA;RAP2C;CCNA2;TIAM1;RAB31;CNKSR3;CDC42EP3;RABL3;RHOU;SOS1;RAPGEF6;KPNB1;DNMT1;ROCK1;RHOBTB3;RAP1B;RAB21;CDC42;NRAS;PAK1;RHOT1;RAP1A;RAB23;G3BP1;G3BP2;SHOC2;RAB28;PAK3;WASF1;PAK2;RAB6B;CTNNAL1;HACE1;SETDB1;PLK2;RAB11A;RAB10;ABI2;RAB12;CDK2;RAB18;KRAS;RAB5A
JNK cascade (GO:0007254)	18/66	0.439087	1	0	0	1.05667	0.869703	MAP3K2;SPAG9;MAP2K4;AXIN1;DUSP9;MAPK10;MDFIC;TAOK1;UBE2N;TAB3;RIPK1;TAB2;MAP3K9;IKBKG;RPS27A;MAP4K5;MAP4K3;MAP3K5
regulation of receptor internalization (GO:0002090)	8/28	0.439383	1	0	0	1.10699	0.91037	ATAD1;CD63;SDCBP;AHI1;MTMR2;FMR1;PICK1;SCYL2
regulation of granulocyte chemotaxis (GO:0071622)	4/13	0.442914	1	0	0	1.19214	0.970858	CSF1;KARS;KIF20B;THBS1
positive regulation of T cell mediated cytotoxicity (GO:0001916)	4/13	0.442914	1	0	0	1.19214	0.970858	FAM49B;IL23A;STX7;PVR
placenta development (GO:0001890)	4/13	0.442914	1	0	0	1.19214	0.970858	PLAC1;PTK2;E2F7;E2F8
pathway-restricted SMAD protein phosphorylation (GO:0060389)	4/13	0.442914	1	0	0	1.19214	0.970858	ACVR1;USP15;TGFB2;TGFBR1
poly(A)+ mRNA export from nucleus (GO:0016973)	4/13	0.442914	1	0	0	1.19214	0.970858	NUP93;ENY2;ZC3H11A;THOC2
protein localization to endoplasmic reticulum (GO:0070972)	4/13	0.442914	1	0	0	1.19214	0.970858	PPP1R15A;HSPA5;CTAGE5;BCAP29
mammary gland epithelium development (GO:0061180)	4/13	0.442914	1	0	0	1.19214	0.970858	LATS1;WNT7B;IRF6;JAK2
pre-miRNA processing (GO:0031054)	4/13	0.442914	1	0	0	1.19214	0.970858	ZCCHC11;DROSHA;DICER1;MRPL44
Notch receptor processing, ligand-dependent (GO:0035333)	4/13	0.442914	1	0	0	1.19214	0.970858	JAG1;ADAM10;YBX1;PSEN1
regulation of DNA-templated transcription in response to stress (GO:0043620)	4/13	0.442914	1	0	0	1.19214	0.970858	RPS6KA3;BCLAF1;HSF2;DDIT3
regulation of biomineral tissue development (GO:0070167)	4/13	0.442914	1	0	0	1.19214	0.970858	CYP27B1;NBR1;TXLNG;DDR2
regulation of macromolecule biosynthetic process (GO:0010556)	4/13	0.442914	1	0	0	1.19214	0.970858	MBD4;MTPN;IGF2BP1;IGF2BP2
DNA damage response, signal transduction by p53 class mediator resulting in transcription of p21 class mediator (GO:0006978)	4/13	0.442914	1	0	0	1.19214	0.970858	RPS6KA6;RPS27L;BRCA1;FOXM1
regulation of macroautophagy (GO:0016241)	31/116	0.445933	1	0	0	1.03542	0.836189	ATP6V1A;SCOC;PRKAA1;GNAI3;VPS26A;TBK1;LARP1;CASP3;RB1CC1;ATP6V1H;VPS35;TBC1D12;IKBKG;ATP6V1D;ATP6V1C1;SNX5;SNX6;SH3GLB1;BNIP3L;ATP6V1G1;SIRT1;RRAGA;IFT88;RRAGC;PIK3CA;RHEB;NEDD4;EXOC4;RAB5A;PAFAH1B2;EXOC1
protein complex assembly (GO:0006461)	50/189	0.447057	1	0	0	1.02499	0.825189	GSK3B;COL16A1;TNFAIP3;ASH2L;CDC73;CASP8;OPA1;MYC;RUVBL1;DNM1L;BOK;SH3GLB1;AXIN1;CSNK1D;DDIT3;SEC22B;CRK;KHDRBS1;BLM;CDC123;CAMK2D;SEC23A;NUFIP1;AHNAK;HDAC1;CUL3;USO1;TGFA;KLHL12;BCL10;TANK;LMAN1;SCFD1;SNX2;RBBP5;ZNHIT6;TRA2B;LEO1;RIPK1;ANKRD28;TRAPPC2;TRAPPC3;NPM1;ST13;CSNK1A1;APC;COL7A1;NBR1;CTNNB1;BET1
negative regulation of fat cell differentiation (GO:0045599)	9/32	0.448378	1	0	0	1.08969	0.874063	ASXL1;ANKRD26;SMAD3;CCDC85B;BBS12;E2F1;AXIN1;TRIB3;SIRT1
regulation of erythrocyte differentiation (GO:0045646)	9/32	0.448378	1	0	0	1.08969	0.874063	HSPA9;MBD4;CDK6;PRMT1;HMGB2;INHBA;HIF1A;HOXA5;ACVR2A
actin filament organization (GO:0007015)	32/120	0.449499	1	0	0	1.03319	0.826162	RHOBTB3;WASL;PPP1R9A;RND3;ARHGAP12;RND1;EPS8;CDC42;BAIAP2L1;PLS3;CGNL1;PLS1;TPM4;TPM3;ACTN1;TMOD3;SHROOM2;DSTN;COBL;RHOC;RHOD;RHOA;SHROOM4;CD2AP;DLG1;MYO1B;ABI2;TRPV4;ABI1;FAT1;RHOU;ARHGEF2
actin polymerization or depolymerization (GO:0008154)	10/36	0.456162	1	0	0	1.07624	0.844748	ABI2;CFL2;ABI1;MICALL2;TWF1;DSTN;COBL;WASL;WASF1;JAK2
regulation of nitric-oxide synthase activity (GO:0050999)	10/36	0.456162	1	0	0	1.07624	0.844748	DHFR;NUS1;LYPLA1;HSP90AA1;SPR;DDAH1;ZDHHC21;WASL;HIF1A;TERF2
regulation of protein sumoylation (GO:0033233)	5/17	0.457106	1	0	0	1.13955	0.892084	RWDD3;GNL3L;CTNNB1;PARK7;GNL3
negative regulation of B cell activation (GO:0050869)	5/17	0.457106	1	0	0	1.13955	0.892084	RC3H1;TNFAIP3;ATM;INHBA;SAMSN1
negative regulation of lipid biosynthetic process (GO:0051055)	5/17	0.457106	1	0	0	1.13955	0.892084	FBXW7;ERLIN1;TRIB3;ERLIN2;BRCA1
negative regulation of cell development (GO:0010721)	5/17	0.457106	1	0	0	1.13955	0.892084	GSK3B;FBXW7;WNT7A;PAX6;HOOK3
pharyngeal system development (GO:0060037)	5/17	0.457106	1	0	0	1.13955	0.892084	TGFB2;BMPR2;SIX4;TGFBR1;BMPR1A
regulation of protein localization to membrane (GO:1905475)	5/17	0.457106	1	0	0	1.13955	0.892084	STX8;STX7;CRIPT;GBP1;APPL1
embryo development ending in birth or egg hatching (GO:0009792)	5/17	0.457106	1	0	0	1.13955	0.892084	TGFB2;USP22;CELF4;RICTOR;BRCA1
virion assembly (GO:0019068)	5/17	0.457106	1	0	0	1.13955	0.892084	USP6NL;TSG101;RPS27A;PPIA;CHMP5
nucleotide catabolic process (GO:0009166)	5/17	0.457106	1	0	0	1.13955	0.892084	VCP;NT5E;NUDT1;NT5C2;ITPA
regulation of lamellipodium organization (GO:1902743)	5/17	0.457106	1	0	0	1.13955	0.892084	CDC42;FER;TWF1;CD44;EPHA2
nucleobase-containing compound biosynthetic process (GO:0034654)	5/17	0.457106	1	0	0	1.13955	0.892084	ADK;TYMS;DCK;ADA;APRT
DNA catabolic process (GO:0006308)	5/17	0.457106	1	0	0	1.13955	0.892084	TATDN1;ERI1;ERI2;XRN2;EXOG
preassembly of GPI anchor in ER membrane (GO:0016254)	5/17	0.457106	1	0	0	1.13955	0.892084	PIGN;PIGA;PIGW;PIGG;PIGF
cell junction assembly (GO:0034329)	16/59	0.458237	1	0	0	1.0507	0.819936	GRHL2;MYO9A;RHOA;ACTG1;GJC1;CDC42;TJP1;PARD6B;CDH1;CDH10;TRPV4;CAPZA1;CDH24;CTNNB1;ITGA6;LIMS1
regulation of protein metabolic process (GO:0051246)	16/59	0.458237	1	0	0	1.0507	0.819936	MTPN;ROCK2;FAF1;ODC1;PLAUR;KLHL11;SNF8;FKBP1A;CHEK2;BTBD3;IGF2BP1;MDM2;SPOPL;VPS35;IGF2BP2;FAM83D
negative regulation of gene expression (GO:0010629)	161/618	0.460235	1	0	0	1.00937	0.783287	CSF2;KDM1A;NAB1;FMR1;GMNN;EIF4A3;ARID4A;PARK7;EPRS;RBPJ;PHB2;ELK3;RPS6KA5;BASP1;SCMH1;CIR1;RPS13;SFMBT1;ZBTB38;SFMBT2;CNPY2;ZBTB33;EID1;ILF3;SHQ1;PSPC1;DDIT3;NCL;TIMELESS;TRIB3;KHDRBS1;DNMT1;SET;SHMT1;HIF1A;GIGYF2;FXR1;LARP1;PDCD10;ZBED6;SNX6;SMAD2;HSPA8;XRCC6;TGFB2;PNPT1;UBE2I;CBX5;SMURF2;TIPARP;XRCC5;CBX3;NONO;H3F3A;SETDB2;HMGA1;EIF2AK2;HMGA2;NR1D2;PA2G4;MEX3C;DHFR;RPS26;MEX3A;CNOT7;SNW1;CNOT1;…
cognition (GO:0050890)	11/40	0.463024	1	0	0	1.06548	0.820394	CYFIP1;NIPBL;TTC8;TUSC3;CHMP2B;ST3GAL4;SLC1A4;MAGT1;TMPRSS11E;BBS4;SHROOM4
sensory organ development (GO:0007423)	11/40	0.463024	1	0	0	1.06548	0.820394	AHI1;FOXC1;SMCHD1;TGFB2;WNT10A;SIX4;PAX8;SHROOM2;RAB18;PAX6;ATF6
regulation of ATPase activity (GO:0043462)	11/40	0.463024	1	0	0	1.06548	0.820394	GABARAPL2;TNNC1;TNNT2;VMA21;ATPIF1;DNAJC10;DNAJB11;RGN;TOR1AIP2;DNAJC24;DNAJC9
negative regulation of neuron apoptotic process (GO:0043524)	17/63	0.463267	1	0	0	1.04549	0.804454	PRKCI;SET;UNC5B;BDNF;NONO;F2R;KIF14;LIG4;PARK7;HIF1A;POU4F1;SIX4;MSH2;GDNF;RASA1;TYRO3;BCL2
regulation of organelle organization (GO:0033043)	30/113	0.464432	1	0	0	1.02862	0.788891	USP6NL;CLIC4;RABGAP1;NEXN;MFF;MTM1;LMAN1;RHOT1;STMN1;TCTEX1D2;MAPK1;VPS35;TBC1D12;DNM1L;EVI5;TBC1D15;TBC1D8B;CDT1;RABGAP1L;TMED9;RDX;MSN;PTK2;TBC1D1;TAOK1;AKAP9;PLXNB1;EZR;SQSTM1;ARHGEF5
vesicle-mediated transport (GO:0016192)	107/410	0.465656	1	0	0	1.01114	0.772824	USP6NL;VPS29;ZFYVE9;GCC2;FNBP1L;GOLGA4;GOLGA5;VPS35;CPNE3;CSNK1G3;PRKCI;STX8;STX7;VRK1;CSNK1D;VRK2;ACAP2;CTAGE5;KIF16B;KIF20A;TBC1D23;STEAP2;CSNK1G1;TMEM87A;ARL1;RHOBTB3;VPS26A;MTM1;SNX4;SNX1;HMGXB4;SNX2;MYO6;ATP6V1H;SNX9;EVI5;RAB6B;SNX5;S100A10;EXPH5;SNX6;SYT4;HSPA8;CCZ1;MYO5A;SNF8;HOOK3;SYT8;AHI1;HOOK2;HOOK1;SPIRE2;SPIRE1;RAB5A;LRP12;MON1B;PICALM;DENND1B;CLTC;SNX10;MIA3;PTPN23;WASL;PIK3C2A;RAB2…
regulation of JNK cascade (GO:0046328)	24/90	0.466257	1	0	0	1.03319	0.788344	GADD45B;GADD45A;WNT7B;DUSP19;AXIN1;WNT7A;HMGB1;TPD52L1;TIRAP;CTGF;IGF1R;IL1A;SDCBP;ITCH;COPS5;MECOM;TAOK1;MARVELD3;RIPK1;AIDA;ZMYND11;MAP3K5;FKTN;MAP4K4
mRNA transcription (GO:0009299)	6/21	0.467803	1	0	0	1.10699	0.84099	MBD4;DDX5;DDIT3;SUPT6H;HIF1A;ATF4
cortical actin cytoskeleton organization (GO:0030866)	6/21	0.467803	1	0	0	1.10699	0.84099	NCKAP1;DLG1;FMNL2;ROCK1;ROCK2;WASL
regulation of cardiac muscle hypertrophy (GO:0010611)	6/21	0.467803	1	0	0	1.10699	0.84099	MTPN;CAMK2D;EDN1;PARP1;GLRX3;PRKCA
positive regulation of histone acetylation (GO:0035066)	6/21	0.467803	1	0	0	1.10699	0.84099	RPS6KA5;TADA2A;RUVBL2;LIF;BRCA1;BRD7
negative regulation of G-protein coupled receptor protein signaling pathway (GO:0045744)	6/21	0.467803	1	0	0	1.10699	0.84099	YWHAB;STMN1;RPGRIP1L;BICD1;MET;ADA
embryonic skeletal system morphogenesis (GO:0048704)	6/21	0.467803	1	0	0	1.10699	0.84099	COL2A1;WDR60;OSR1;EIF4A3;AXIN1;TGFBR1
vesicle docking (GO:0048278)	6/21	0.467803	1	0	0	1.10699	0.84099	STX12;STX17;STX8;USO1;STX7;STX3
regulation of interleukin-2 production (GO:0032663)	6/21	0.467803	1	0	0	1.10699	0.84099	PRNP;ANXA1;NAV3;RPS3;TNFAIP3;TANK
hepaticobiliary system development (GO:0061008)	6/21	0.467803	1	0	0	1.10699	0.84099	NIPBL;CITED2;CEBPG;COBL;PKD2;MET
negative regulation of ion transmembrane transporter activity (GO:0032413)	6/21	0.467803	1	0	0	1.10699	0.84099	YWHAE;CAMK2D;OSR1;NEDD4;STK39;GOPC
insulin receptor signaling pathway (GO:0008286)	18/67	0.467962	1	0	0	1.0409	0.790427	ATP6V1A;FOXC2;ATP6V1G1;IDE;PIK3C2A;IGF1R;FER;BAIAP2L1;PIK3CA;APC;ATP6V1H;PHIP;AP3S1;SOS1;ATP6V1D;ATP6V1C1;PTPN2;APPL1
phosphatidylinositol biosynthetic process (GO:0006661)	26/98	0.473605	1	0	0	1.02792	0.768248	PI4K2B;MTMR2;PIGN;PTEN;CWH43;PIK3CB;PIK3C2A;PIGW;MTM1;INPP5F;IMPA1;PLCG2;PIP5K1A;PLEKHA1;PLEKHA2;SACM1L;OCRL;PLEKHA3;SYNJ2;FIG4;PIK3CA;PIGA;PIK3C3;PIGG;RAB5A;PIGF
positive regulation of intracellular protein transport (GO:0090316)	40/152	0.474175	1	0	0	1.0196	0.760801	YWHAE;USP36;GSK3B;GLS2;UBE2D3;NKAP;HTRA2;EFCAB7;MFF;WDR46;IPO5;NPEPPS;CYB5R1;UBL5;XPO4;PDCD10;RUVBL1;CHORDC1;TPR;MICALL2;PLAGL2;ECT2;GTSE1;CEP290;SH3GLB1;CDKL2;PRNP;TMEM30A;FBXW7;CSNK2A2;WDR75;NRG1;PDZK1;WBP11;TOMM7;RHOU;ANP32B;KIF20B;SAE1;RBM22
cellular response to mechanical stimulus (GO:0071260)	13/48	0.474715	1	0	0	1.04933	0.781796	MAP3K2;CASP8AP2;MAP2K4;GADD45A;TNFRSF10B;BCL10;CASP8;CHEK1;ANKRD1;CASP1;FAS;TLR4;TLR3
endosome to lysosome transport (GO:0008333)	13/48	0.474715	1	0	0	1.04933	0.781796	VCP;VPS4B;AKTIP;HOOK3;MTM1;HMGXB4;VAMP7;HOOK2;SNX16;HOOK1;RAB12;VPS41;SCYL2
positive regulation of nuclear division (GO:0051785)	7/25	0.476386	1	0	0	1.08485	0.804447	IL1A;EDN1;NPM2;NUSAP1;TGFA;PHIP;AURKA
cellular response to epidermal growth factor stimulus (GO:0071364)	7/25	0.476386	1	0	0	1.08485	0.804447	EEF1A1;MBD4;FOXC1;MARS;PTPN11;IQGAP1;PTPN12
regulation of viral release from host cell (GO:1902186)	7/25	0.476386	1	0	0	1.08485	0.804447	DDB1;TSG101;VPS4B;CHMP2B;CHMP4C;CHMP2A;TRIM25
long-chain fatty-acyl-CoA metabolic process (GO:0035336)	7/25	0.476386	1	0	0	1.08485	0.804447	ACOT7;THEM4;ACSL5;ACSL4;FAR1;ACSL3;ELOVL7
regulation of nervous system development (GO:0051960)	7/25	0.476386	1	0	0	1.08485	0.804447	YAP1;DOCK7;KIF14;HMGB2;CTNNB1;PDLIM5;RTN4
positive regulation of embryonic development (GO:0040019)	7/25	0.476386	1	0	0	1.08485	0.804447	SIX4;GDNF;OSR1;RBM19;SCX;PHLDB2;CLASP1
misfolded or incompletely synthesized protein catabolic process (GO:0006515)	7/25	0.476386	1	0	0	1.08485	0.804447	ATXN3;UBE2W;VCP;CUL3;LONP1;YME1L1;UGGT1
plasma membrane bounded cell projection morphogenesis (GO:0120039)	14/52	0.479792	1	0	0	1.04313	0.766073	NCKAP1;ANKRD27;BDNF;DICER1;PAK1;SNX1;SNX2;CTTN;ALS2;STK24;PLXNB1;KIF20B;SRGAP2;MAP4K4
positive regulation of myeloid cell differentiation (GO:0045639)	8/29	0.483565	1	0	0	1.06882	0.776572	MBD4;CSF3;PRMT1;HMGB2;INHBA;HIF1A;HOXA5;ACVR2A
carbohydrate derivative biosynthetic process (GO:1901137)	8/29	0.483565	1	0	0	1.06882	0.776572	RRM1;RRM2;SCCPDH;ALG6;RRM2B;ST3GAL4;ALG11;DDR2
negative regulation of neuron death (GO:1901215)	22/83	0.484149	1	0	0	1.02697	0.744923	GSK3B;PRKCI;SET;UNC5B;BDNF;F2R;KIF14;LIG4;HTRA2;PARK7;TANK;POU4F1;SIX4;MSH2;GPNMB;GDNF;RASA1;TYRO3;BCL2;VPS35;IKBKG;ATF4
protein localization to non-motile cilium (GO:0097499)	2/6	0.485194	1	0	0	1.29149	0.934013	BBIP1;SPATA7
hindlimb morphogenesis (GO:0035137)	2/6	0.485194	1	0	0	1.29149	0.934013	OSR1;WNT7A
response to chemokine (GO:1990868)	2/6	0.485194	1	0	0	1.29149	0.934013	FOXC1;RHOA
neuron projection maintenance (GO:1990535)	2/6	0.485194	1	0	0	1.29149	0.934013	PRNP;PSEN1
determination of liver left/right asymmetry (GO:0071910)	2/6	0.485194	1	0	0	1.29149	0.934013	CCDC39;PKD2
positive regulation of myelination (GO:0031643)	2/6	0.485194	1	0	0	1.29149	0.934013	PARD3;DICER1
chromatin silencing at telomere (GO:0006348)	2/6	0.485194	1	0	0	1.29149	0.934013	INSL6;DPY30
positive regulation of activin receptor signaling pathway (GO:0032927)	2/6	0.485194	1	0	0	1.29149	0.934013	SMAD2;ACVR2A
negative regulation of type I interferon-mediated signaling pathway (GO:0060339)	2/6	0.485194	1	0	0	1.29149	0.934013	CNOT7;PTPN2
bundle of His cell-Purkinje myocyte adhesion involved in cell communication (GO:0086073)	2/6	0.485194	1	0	0	1.29149	0.934013	DSP;DSG2
negative regulation of endoplasmic reticulum calcium ion concentration (GO:0032471)	2/6	0.485194	1	0	0	1.29149	0.934013	RAP1GDS1;THADA
protein deubiquitination involved in ubiquitin-dependent protein catabolic process (GO:0071947)	2/6	0.485194	1	0	0	1.29149	0.934013	OTUD7B;TNFAIP3
vesicle fusion with endoplasmic reticulum-Golgi intermediate compartment (ERGIC) membrane (GO:1990668)	2/6	0.485194	1	0	0	1.29149	0.934013	CALR;SEC22B
cardiolipin acyl-chain remodeling (GO:0035965)	2/6	0.485194	1	0	0	1.29149	0.934013	PLA2G4A;LCLAT1
iron ion import (GO:0097286)	2/6	0.485194	1	0	0	1.29149	0.934013	TFRC;PICALM
protein localization to endoplasmic reticulum exit site (GO:0070973)	2/6	0.485194	1	0	0	1.29149	0.934013	CTAGE5;BCAP29
iron ion import across plasma membrane (GO:0098711)	2/6	0.485194	1	0	0	1.29149	0.934013	STEAP2;PICALM
monoamine transport (GO:0015844)	2/6	0.485194	1	0	0	1.29149	0.934013	PICK1;SLC18A2
phosphorylation of RNA polymerase II C-terminal domain (GO:0070816)	2/6	0.485194	1	0	0	1.29149	0.934013	GTF2H1;CDK12
oxygen homeostasis (GO:0032364)	2/6	0.485194	1	0	0	1.29149	0.934013	WNT7B;HIF1A
platelet dense granule organization (GO:0060155)	2/6	0.485194	1	0	0	1.29149	0.934013	BLOC1S2;F2R
spermine metabolic process (GO:0008215)	2/6	0.485194	1	0	0	1.29149	0.934013	SMS;SAT1
regulation of histone deacetylase activity (GO:1901725)	2/6	0.485194	1	0	0	1.29149	0.934013	KDM5A;CAMK2D
negative regulation of dendritic spine development (GO:0061000)	2/6	0.485194	1	0	0	1.29149	0.934013	EFNA1;PTEN
gap junction assembly (GO:0016264)	2/6	0.485194	1	0	0	1.29149	0.934013	GJC1;GJA1
glandular epithelial cell development (GO:0002068)	2/6	0.485194	1	0	0	1.29149	0.934013	CDK6;PAX6
citrulline metabolic process (GO:0000052)	2/6	0.485194	1	0	0	1.29149	0.934013	DDAH1;ALDH18A1
regulation of glial cell apoptotic process (GO:0034350)	2/6	0.485194	1	0	0	1.29149	0.934013	PRKCI;PRKCA
regulation of NK T cell activation (GO:0051133)	2/6	0.485194	1	0	0	1.29149	0.934013	HSPH1;IL23A
forebrain regionalization (GO:0021871)	2/6	0.485194	1	0	0	1.29149	0.934013	WNT7B;AXIN1
negative regulation of vasculature development (GO:1901343)	2/6	0.485194	1	0	0	1.29149	0.934013	FOXC1;PDCD4
regulation of chemokine-mediated signaling pathway (GO:0070099)	2/6	0.485194	1	0	0	1.29149	0.934013	EDN1;HIF1A
Golgi disassembly (GO:0090166)	2/6	0.485194	1	0	0	1.29149	0.934013	CDK1;VRK1
response to UV-A (GO:0070141)	2/6	0.485194	1	0	0	1.29149	0.934013	CCND1;PPID
negative regulation of amino acid transport (GO:0051956)	2/6	0.485194	1	0	0	1.29149	0.934013	OSR1;STK39
positive regulation of microtubule motor activity (GO:2000576)	2/6	0.485194	1	0	0	1.29149	0.934013	DYNC1I2;DYNLL1
macrophage derived foam cell differentiation (GO:0010742)	2/6	0.485194	1	0	0	1.29149	0.934013	SOAT1;SOAT2
positive regulation of mitophagy in response to mitochondrial depolarization (GO:0098779)	2/6	0.485194	1	0	0	1.29149	0.934013	TOMM7;OPTN
positive regulation of protein import into nucleus, translocation (GO:0033160)	2/6	0.485194	1	0	0	1.29149	0.934013	UBR5;PSEN1
protein insertion into mitochondrial membrane involved in apoptotic signaling pathway (GO:0001844)	2/6	0.485194	1	0	0	1.29149	0.934013	MOAP1;BCL2L11
positive regulation of histone phosphorylation (GO:0033129)	2/6	0.485194	1	0	0	1.29149	0.934013	RPS6KA5;FMR1
gland morphogenesis (GO:0022612)	2/6	0.485194	1	0	0	1.29149	0.934013	TGFB2;MSN
retrograde transport, vesicle recycling within Golgi (GO:0000301)	2/6	0.485194	1	0	0	1.29149	0.934013	GOLGA5;OPTN
negative regulation of calcium ion-dependent exocytosis (GO:0045955)	2/6	0.485194	1	0	0	1.29149	0.934013	SYT4;FMR1
folic acid-containing compound biosynthetic process (GO:0009396)	2/6	0.485194	1	0	0	1.29149	0.934013	DHFR;ATPIF1
negative regulation of erythrocyte differentiation (GO:0045647)	2/6	0.485194	1	0	0	1.29149	0.934013	HSPA9;HOXA5
NADH metabolic process (GO:0006734)	2/6	0.485194	1	0	0	1.29149	0.934013	VCP;NUDT12
negative regulation of T cell differentiation in thymus (GO:0033085)	2/6	0.485194	1	0	0	1.29149	0.934013	ZC3H8;PTPN2
heparan sulfate proteoglycan biosynthetic process, enzymatic modification (GO:0015015)	2/6	0.485194	1	0	0	1.29149	0.934013	HS6ST1;HS2ST1
SREBP signaling pathway (GO:0032933)	2/6	0.485194	1	0	0	1.29149	0.934013	ERLIN1;ERLIN2
aggrephagy (GO:0035973)	2/6	0.485194	1	0	0	1.29149	0.934013	SQSTM1;ATG5
regulation of anion channel activity (GO:0010359)	2/6	0.485194	1	0	0	1.29149	0.934013	PRNP;GOPC
enteric nervous system development (GO:0048484)	2/6	0.485194	1	0	0	1.29149	0.934013	GDNF;PHACTR4
positive regulation of centrosome cycle (GO:0046607)	2/6	0.485194	1	0	0	1.29149	0.934013	RANBP2;RANBP1
positive regulation of oxidative stress-induced cell death (GO:1903209)	2/6	0.485194	1	0	0	1.29149	0.934013	RIPK1;TLR4
mitochondrial RNA processing (GO:0000963)	2/6	0.485194	1	0	0	1.29149	0.934013	PNPT1;FASTKD5
positive regulation of intracellular estrogen receptor signaling pathway (GO:0033148)	2/6	0.485194	1	0	0	1.29149	0.934013	YAP1;PAK1
peptidyl-serine autophosphorylation (GO:0036289)	2/6	0.485194	1	0	0	1.29149	0.934013	ATM;RIPK1
nucleoside phosphate catabolic process (GO:1901292)	2/6	0.485194	1	0	0	1.29149	0.934013	DCTPP1;ITPA
long term synaptic depression (GO:0060292)	2/6	0.485194	1	0	0	1.29149	0.934013	PLK2;PICK1
snRNA transcription from RNA polymerase III promoter (GO:0042796)	2/6	0.485194	1	0	0	1.29149	0.934013	SNAPC1;ZC3H8
foam cell differentiation (GO:0090077)	2/6	0.485194	1	0	0	1.29149	0.934013	SOAT1;SOAT2
negative regulation of glycogen biosynthetic process (GO:0045719)	2/6	0.485194	1	0	0	1.29149	0.934013	GSK3B;PASK
neuron remodeling (GO:0016322)	2/6	0.485194	1	0	0	1.29149	0.934013	EPHA8;RND1
vitamin A metabolic process (GO:0006776)	2/6	0.485194	1	0	0	1.29149	0.934013	RBP2;ARID4A
pyrimidine-containing compound biosynthetic process (GO:0072528)	2/6	0.485194	1	0	0	1.29149	0.934013	PRPS1;UMPS
negative regulation of mRNA catabolic process (GO:1902373)	2/6	0.485194	1	0	0	1.29149	0.934013	FMR1;PABPC1
regulation of endothelial cell development (GO:1901550)	2/6	0.485194	1	0	0	1.29149	0.934013	ROCK1;ROCK2
cellular response to chemokine (GO:1990869)	2/6	0.485194	1	0	0	1.29149	0.934013	FOXC1;RHOA
positive regulation of hormone metabolic process (GO:0032352)	2/6	0.485194	1	0	0	1.29149	0.934013	PAX8;HIF1A
negative regulation of translation in response to stress (GO:0032055)	2/6	0.485194	1	0	0	1.29149	0.934013	EIF2S1;ATF4
dopamine catabolic process (GO:0042420)	2/6	0.485194	1	0	0	1.29149	0.934013	MOXD1;MAOA
regulation of intrinsic apoptotic signaling pathway by p53 class mediator (GO:1902253)	2/6	0.485194	1	0	0	1.29149	0.934013	RPS7;MDM2
protein retention in ER lumen (GO:0006621)	2/6	0.485194	1	0	0	1.29149	0.934013	PDIA3;PDIA2
establishment of mitochondrion localization, microtubule-mediated (GO:0034643)	2/6	0.485194	1	0	0	1.29149	0.934013	RHOT1;LRPPRC
negative regulation of cellular response to hypoxia (GO:1900038)	2/6	0.485194	1	0	0	1.29149	0.934013	DDAH1;HYOU1
positive regulation of amyloid-beta clearance (GO:1900223)	2/6	0.485194	1	0	0	1.29149	0.934013	ROCK1;PICALM
heparan sulfate proteoglycan biosynthetic process, polysaccharide chain biosynthetic process (GO:0015014)	2/6	0.485194	1	0	0	1.29149	0.934013	CSGALNACT1;HS2ST1
positive regulation of podosome assembly (GO:0071803)	2/6	0.485194	1	0	0	1.29149	0.934013	CSF2;ASAP1
regulation of cardiac muscle cell apoptotic process (GO:0010665)	2/6	0.485194	1	0	0	1.29149	0.934013	CAMK2D;LTK
positive regulation of fibroblast migration (GO:0010763)	2/6	0.485194	1	0	0	1.29149	0.934013	THBS1;DDR2
regulation of protein targeting (GO:1903533)	2/6	0.485194	1	0	0	1.29149	0.934013	HAX1;ATPIF1
ear development (GO:0043583)	2/6	0.485194	1	0	0	1.29149	0.934013	NIPBL;SHROOM2
positive regulation of cell-matrix adhesion (GO:0001954)	9/33	0.489748	1	0	0	1.05667	0.754321	GSK3B;COL16A1;CDK6;ROCK1;CSF1;PLEKHA2;EPHA1;S100A10;LIMS1
regulation of autophagosome assembly (GO:2000785)	9/33	0.489748	1	0	0	1.05667	0.754321	SH3GLB1;SCFD1;IFT88;PHF23;FEZ2;TBC1D12;SEC22B;RAB5A;RAB3GAP1
positive regulation of cytokine-mediated signaling pathway (GO:0001961)	9/33	0.489748	1	0	0	1.05667	0.754321	EDN1;CSF1;TSLP;IL7;AXL;CASP1;PARP9;HIF1A;UBE2K
positive regulation of protein polymerization (GO:0032273)	17/64	0.492866	1	0	0	1.02916	0.728146	NCKAP1;CSF3;SLAIN2;CLIP1;PAK1;FER;BAIAP2L1;NAV3;CTTN;AKAP9;CDC42EP3;RPS3;MAPRE1;MET;CLASP1;CDK5RAP2;NCK1
positive regulation of amyloid-beta formation (GO:1902004)	3/10	0.498615	1	0	0	1.16234	0.808897	EFNA1;ROCK2;PICALM
mesoderm morphogenesis (GO:0048332)	3/10	0.498615	1	0	0	1.16234	0.808897	SMAD2;BMPR2;SCX
glutamine metabolic process (GO:0006541)	3/10	0.498615	1	0	0	1.16234	0.808897	GLS2;NIT2;GLS
base-excision repair, AP site formation (GO:0006285)	3/10	0.498615	1	0	0	1.16234	0.808897	MBD4;TDG;UNG
DNA dealkylation involved in DNA repair (GO:0006307)	3/10	0.498615	1	0	0	1.16234	0.808897	ALKBH1;ASCC2;ASCC3
glycoprotein catabolic process (GO:0006516)	3/10	0.498615	1	0	0	1.16234	0.808897	MGEA5;MANBA;FBXO2
actin filament depolymerization (GO:0030042)	3/10	0.498615	1	0	0	1.16234	0.808897	CFL2;DSTN;TWF1
regulation of histone phosphorylation (GO:0033127)	3/10	0.498615	1	0	0	1.16234	0.808897	RPS6KA5;FMR1;AKAP8
DNA dealkylation (GO:0035510)	3/10	0.498615	1	0	0	1.16234	0.808897	ALKBH1;ASCC2;ASCC3
negative regulation of protein maturation (GO:1903318)	3/10	0.498615	1	0	0	1.16234	0.808897	PRNP;SNX12;CHAC1
negative regulation of stem cell differentiation (GO:2000737)	3/10	0.498615	1	0	0	1.16234	0.808897	JAG1;HNRNPU;N4BP2L2
actin filament-based transport (GO:0099515)	3/10	0.498615	1	0	0	1.16234	0.808897	MYO5A;WASL;FNBP1L
very-low-density lipoprotein particle assembly (GO:0034379)	3/10	0.498615	1	0	0	1.16234	0.808897	SOAT1;SOAT2;ACSL3
endothelial tube morphogenesis (GO:0061154)	3/10	0.498615	1	0	0	1.16234	0.808897	CTNNB1;RBPJ;RHOA
forelimb morphogenesis (GO:0035136)	3/10	0.498615	1	0	0	1.16234	0.808897	NIPBL;OSR1;WNT7A
cellular response to thyroid hormone stimulus (GO:0097067)	3/10	0.498615	1	0	0	1.16234	0.808897	MBD4;CTSL;RDX
cellular biogenic amine metabolic process (GO:0006576)	3/10	0.498615	1	0	0	1.16234	0.808897	MAOA;ODC1;SMS
odontogenesis (GO:0042476)	11/41	0.500066	1	0	0	1.03949	0.720383	FOXC1;HDAC2;WNT10A;TGFB2;HDAC1;TUFT1;ANKRD11;OSR1;LAMB1;INHBA;BCOR
regulation of substrate adhesion-dependent cell spreading (GO:1900024)	11/41	0.500066	1	0	0	1.03949	0.720383	CDC42;DOCK5;RCC2;AP1AR;CALR;EFNA5;GBP1;CRK;PTK2;S100A10;LIMS1
regulation of protein localization (GO:0032880)	11/41	0.500066	1	0	0	1.03949	0.720383	FKBP1A;RSL1D1;RABGAP1L;KDM1A;SUMO1;DNAJB6;PARP1;FBXW7;CEP290;TMEM231;PICALM
positive regulation of receptor-mediated endocytosis (GO:0048260)	11/41	0.500066	1	0	0	1.03949	0.720383	RAB21;ATAD1;CD63;AHI1;HNRNPK;FMR1;PICK1;WASL;BICD1;SCYL2;PICALM
lysosomal transport (GO:0007041)	19/72	0.500256	1	0	0	1.02243	0.708171	AKTIP;NCOA4;GCC2;HOOK3;MTM1;AP3M1;ZFYVE16;VAMP7;HMGXB4;HOOK2;SNX16;LARS;HOOK1;RAB12;NEDD4;VPS41;VPS54;VPS35;SCYL2
Rho protein signal transduction (GO:0007266)	19/72	0.500256	1	0	0	1.02243	0.708171	ROCK1;ARHGDIG;RHOBTB3;ARHGAP5;RHOC;RND3;RHOD;RHOA;RND1;EPS8;CDC42;PAK1;RHOT1;CDC42EP3;RHOU;PAK3;PAK2;CTNNAL1;PHACTR4
apoptotic process (GO:0006915)	60/231	0.502537	1	0	0	1.00636	0.692459	NCKAP1;CSE1L;NUDT2;BRCA1;IFIT2;CASP12;CASP8;AIFM1;MYC;CASP3;CHEK1;DPF1;CASP1;IKBKG;JAK2;PHLDA2;DNM1L;IFT57;IER3;BOK;EIF5A;PARP1;APAF1;MAGI3;THOC1;PAWR;LIG4;CIT;TRAIP;IL1A;PLSCR1;MELK;RRAGC;PIK3CA;ESPL1;NDUFS1;MCM2;PPP1R15A;PLAG1;EI24;RTN4;STK3;HSPD1;FXR1;BCLAF1;BCL2L11;BNIP1;PLAGL2;BNIP2;RIPK1;NAE1;BID;YARS;GADD45A;FEM1B;TNFRSF10B;CDK11B;BCL2;PDCD4;FAS
transforming growth factor beta receptor signaling pathway (GO:0007179)	20/76	0.503649	1	0	0	1.0196	0.699316	ACVR1;SMAD2;USP15;TGFB2;SMAD3;ZFYVE9;USP9X;PTPRK;CGN;F11R;SIRT1;RHOA;TGFBR1;PTK2;FKBP1A;FNTA;PARD3;ADAM9;RPS27A;BMPR1A
nucleoside salvage (GO:0043174)	4/14	0.507053	1	0	0	1.10699	0.7518	UCK2;UPRT;TK1;DCK
negative regulation of focal adhesion assembly (GO:0051895)	4/14	0.507053	1	0	0	1.10699	0.7518	RCC2;PTEN;THBS1;PHLDB2
cell surface receptor signaling pathway involved in heart development (GO:0061311)	4/14	0.507053	1	0	0	1.10699	0.7518	ACVR1;JAG1;RBPJ;BMPR1A
positive regulation of mitochondrial fission (GO:0090141)	4/14	0.507053	1	0	0	1.10699	0.7518	VPS35;MFF;DNM1L;MARCH5
purine-containing compound salvage (GO:0043101)	4/14	0.507053	1	0	0	1.10699	0.7518	ADK;DCK;ADA;APRT
smooth muscle contraction (GO:0006939)	4/14	0.507053	1	0	0	1.10699	0.7518	ROCK1;ROCK2;BDKRB2;PIK3C2A
regulation of cyclin-dependent protein serine/threonine kinase activity involved in G1/S transition of mitotic cell cycle (GO:0031657)	4/14	0.507053	1	0	0	1.10699	0.7518	CDK6;CDK4;PTEN;PKD2
metallo-sulfur cluster assembly (GO:0031163)	4/14	0.507053	1	0	0	1.10699	0.7518	HSPA9;NUBPL;FAM96B;CIAPIN1
DNA damage response, signal transduction resulting in transcription (GO:0042772)	4/14	0.507053	1	0	0	1.10699	0.7518	RPS6KA6;RPS27L;BRCA1;FOXM1
negative regulation of cell migration involved in sprouting angiogenesis (GO:0090051)	4/14	0.507053	1	0	0	1.10699	0.7518	CARD10;PDCD10;THBS1;RHOA
DNA modification (GO:0006304)	4/14	0.507053	1	0	0	1.10699	0.7518	MBD4;TDG;EXOSC3;UNG
adaptive immune response based on somatic recombination of immune receptors built from immunoglobulin superfamily domains (GO:0002460)	4/14	0.507053	1	0	0	1.10699	0.7518	JAG1;MSH2;GNL1;TLR4
regulation of gastrulation (GO:0010470)	4/14	0.507053	1	0	0	1.10699	0.7518	OSR1;SCX;PHLDB2;CLASP1
regulation of histone modification (GO:0031056)	4/14	0.507053	1	0	0	1.10699	0.7518	SETD5;PARG;AKAP8;UBE2N
nucleoside triphosphate metabolic process (GO:0009141)	4/14	0.507053	1	0	0	1.10699	0.7518	NME2;AK4;DCTPP1;ITPA
interleukin-6-mediated signaling pathway (GO:0070102)	4/14	0.507053	1	0	0	1.10699	0.7518	FER;CTR9;PTPN11;JAK2
regulation of interferon-gamma biosynthetic process (GO:0045072)	4/14	0.507053	1	0	0	1.10699	0.7518	CEBPG;INHBA;TLR3;CD276
negative regulation of T cell receptor signaling pathway (GO:0050860)	4/14	0.507053	1	0	0	1.10699	0.7518	PRNP;EZR;GBP1;PTPN2
purine-containing compound catabolic process (GO:0072523)	4/14	0.507053	1	0	0	1.10699	0.7518	NT5E;NUDT1;NT5C2;ITPA
ncRNA transcription (GO:0098781)	4/14	0.507053	1	0	0	1.10699	0.7518	MARS;SPIN1;CD3EAP;RPAP2
gliogenesis (GO:0042063)	4/14	0.507053	1	0	0	1.10699	0.7518	TGFB2;METTL14;CDK6;NFIB
regulation of activin receptor signaling pathway (GO:0032925)	4/14	0.507053	1	0	0	1.10699	0.7518	ACVR1;FKBP1A;LEMD3;ACVR2A
negative regulation of Rho protein signal transduction (GO:0035024)	4/14	0.507053	1	0	0	1.10699	0.7518	CUL3;STMN1;MET;SCAI
establishment of protein localization to mitochondrion (GO:0072655)	13/49	0.508541	1	0	0	1.02792	0.695089	TIMM9;TIMM22;MFF;TOMM20;TOMM22;HSPD1;CHCHD4;PITRM1;GRPEL1;GRPEL2;TIMM17A;TOMM7;TOMM5
positive regulation of protein import into nucleus (GO:0042307)	14/53	0.512291	1	0	0	1.02344	0.684544	CSF3;SMAD3;F2R;PSEN1;EFCAB7;TGFBR1;IPO5;NUP93;CDH1;UBR5;TPR;ECT2;RBM22;BMPR1A
regulation of spindle organization (GO:0090224)	5/18	0.513367	1	0	0	1.07624	0.7176	SENP6;GPSM2;TPX2;CLTC;TACC3
establishment or maintenance of apical/basal cell polarity (GO:0035088)	5/18	0.513367	1	0	0	1.07624	0.7176	PRKCI;CLIC4;DLG1;DLG3;PARD3
retrograde protein transport, ER to cytosol (GO:0030970)	5/18	0.513367	1	0	0	1.07624	0.7176	VCP;RHBDD1;FAF2;DERL2;HSP90B1
positive regulation of morphogenesis of an epithelium (GO:1905332)	5/18	0.513367	1	0	0	1.07624	0.7176	AHI1;PAX8;GDNF;SIX4;LIF
negative regulation of calcium-mediated signaling (GO:0050849)	5/18	0.513367	1	0	0	1.07624	0.7176	PRNP;GSTO1;CHORDC1;PKD2;CALM2
membrane lipid metabolic process (GO:0006643)	5/18	0.513367	1	0	0	1.07624	0.7176	KDELC1;KDELC2;SERINC1;SMPDL3B;B4GALT4
IRE1-mediated unfolded protein response (GO:0036498)	15/57	0.515784	1	0	0	1.0196	0.675041	HSPA5;DDX11;GFPT1;PDIA6;PDIA5;DNAJC3;EXTL2;SEC61G;DNAJB11;SSR1;DNAJB9;HYOU1;HDGF;SEC62;SEC63
regulation of neurogenesis (GO:0050767)	15/57	0.515784	1	0	0	1.0196	0.675041	YAP1;ROCK1;BDNF;DOCK7;HMGB2;LIG4;WNT7A;PAX6;HOOK3;SNW1;CDK5RAP1;CTNNB1;CDK5RAP3;YWHAH;CDK5RAP2
peptidyl-S-diacylglycerol-L-cysteine biosynthetic process from peptidyl-cysteine (GO:0018231)	6/22	0.518506	1	0	0	1.05667	0.694026	ZDHHC20;ZDHHC23;ZDHHC6;ZDHHC21;ZDHHC2;GOLGA7
peptidyl-L-cysteine S-palmitoylation (GO:0018230)	6/22	0.518506	1	0	0	1.05667	0.694026	ZDHHC20;ZDHHC23;ZDHHC6;ZDHHC21;ZDHHC2;GOLGA7
positive regulation of interleukin-10 production (GO:0032733)	6/22	0.518506	1	0	0	1.05667	0.694026	TSLP;IL23A;HMGB1;PIBF1;TLR4;HSPD1
positive regulation of erythrocyte differentiation (GO:0045648)	6/22	0.518506	1	0	0	1.05667	0.694026	MBD4;PRMT1;HMGB2;INHBA;HIF1A;ACVR2A
beta-catenin destruction complex disassembly (GO:1904886)	6/22	0.518506	1	0	0	1.05667	0.694026	GSK3B;APC;CSNK1A1;AXIN1;DVL2;CTNNB1
negative regulation of GTPase activity (GO:0034260)	6/22	0.518506	1	0	0	1.05667	0.694026	ARFGEF1;RCC2;RDX;SH3BP4;RRP1B;F11R
regulation of interferon-gamma-mediated signaling pathway (GO:0060334)	6/22	0.518506	1	0	0	1.05667	0.694026	HSP90AB1;SUMO1;CDC37;PARP9;JAK2;PTPN2
cellular response to transforming growth factor beta stimulus (GO:0071560)	26/100	0.520985	1	0	0	1.00736	0.656834	DLX1;USP15;ZFYVE9;PDCD5;PTPRK;F11R;FNTA;ANKRD1;RPS27A;ACVR1;SMAD2;TGFB2;WNT10A;SMAD3;USP9X;WNT7A;CGN;SIRT1;PTK2;RHOA;TGFBR1;FKBP1A;PARD3;ADAM9;BMPR1A;LIMS1
negative regulation of blood vessel morphogenesis (GO:2000181)	17/65	0.522146	1	0	0	1.01332	0.658465	ATF2;FOXC1;TGFB2;ROCK1;ROCK2;SARS;SEMA3E;SYNJ2BP;THBS1;MECP2;NPPB;SPRED1;PGK1;KRIT1;CTNNB1;HOXA5;GTF2I
positive regulation of cyclin-dependent protein kinase activity (GO:1904031)	7/26	0.5229	1	0	0	1.04313	0.676327	PSMD10;CCNK;CCND1;CCNH;CKS2;CCNC;CKS1B
regulation of pri-miRNA transcription from RNA polymerase II promoter (GO:1902893)	7/26	0.5229	1	0	0	1.04313	0.676327	TGFB2;SMAD3;NFIB;HIF1A;TEAD1;GNL3;APLN
positive regulation of wound healing (GO:0090303)	7/26	0.5229	1	0	0	1.04313	0.676327	ARFGEF1;FOXC2;ANXA1;F2R;ENPP4;THBS1;HBEGF
fat-soluble vitamin metabolic process (GO:0006775)	7/26	0.5229	1	0	0	1.04313	0.676327	CYP27B1;CUBN;UBE2I;CYP24A1;RBP2;SUMO2;ARID4A
snRNA 3'-end processing (GO:0034472)	7/26	0.5229	1	0	0	1.04313	0.676327	EXOSC7;EXOSC9;EXOSC8;INTS2;INTS6;EXOSC3;EXOSC2
snRNA processing (GO:0016180)	7/26	0.5229	1	0	0	1.04313	0.676327	INTS12;INTS3;INTS10;INTS2;TUT1;INTS6;INTS8
smoothened signaling pathway (GO:0007224)	8/30	0.526773	1	0	0	1.03319	0.66226	TTC26;STIL;ARL13B;CC2D2A;GLI3;SEPT2;TTBK2;TMEM231
beta-catenin-TCF complex assembly (GO:1904837)	8/30	0.526773	1	0	0	1.03319	0.66226	HDAC1;RBBP5;MYC;RUVBL1;LEO1;CTNNB1;ASH2L;CDC73
phosphatidylinositol 3-kinase signaling (GO:0014065)	8/30	0.526773	1	0	0	1.03319	0.66226	LTK;EDN1;PLEKHA1;PIK3CA;TYRO3;PIK3CB;PIK3C2A;IGF1R
negative regulation of cell morphogenesis involved in differentiation (GO:0010771)	8/30	0.526773	1	0	0	1.03319	0.66226	RCC2;PTEN;AP1AR;EFNA5;GBP1;RTN4;RHOA;YWHAH
positive regulation of reactive oxygen species biosynthetic process (GO:1903428)	8/30	0.526773	1	0	0	1.03319	0.66226	EDN1;HSP90AA1;HSP90AB1;SMAD3;DDAH1;PKD2;PTGS2;TLR4
positive regulation of cyclin-dependent protein serine/threonine kinase activity (GO:0045737)	8/30	0.526773	1	0	0	1.03319	0.66226	PSMD10;CCNK;CCND1;CCNH;CKS2;CCNC;PKD2;CKS1B
regulation of wound healing (GO:0061041)	9/34	0.530263	1	0	0	1.02559	0.650618	ARFGEF1;ANXA1;TNFRSF12A;PLAU;F2R;TNFAIP3;CASK;CRK;HBEGF
ventricular cardiac muscle tissue morphogenesis (GO:0055010)	9/34	0.530263	1	0	0	1.02559	0.650618	DSP;FKBP1A;TGFB2;TNNC1;TNNT2;NRG1;RBPJ;TGFBR1;BMPR1A
macromolecule catabolic process (GO:0009057)	9/34	0.530263	1	0	0	1.02559	0.650618	SH3GLB1;BACE1;BECN1;KIF16B;SNX25;NEDD4;PRSS16;UCHL3;CLPX
ncRNA metabolic process (GO:0034660)	9/34	0.530263	1	0	0	1.02559	0.650618	TRIM71;ZCCHC11;XPO5;PARN;DROSHA;DGCR8;DICER1;DTD1;RAN
cellular response to radiation (GO:0071478)	11/42	0.536414	1	0	0	1.01474	0.632031	RAD51AP1;BLM;RAD51;KDM4D;GADD45A;EEF1D;FIGNL1;HUS1;ECT2;TANK;SIRT1
regulation of protein modification process (GO:0031399)	11/42	0.536414	1	0	0	1.01474	0.632031	CCDC88A;SPRED1;PPP1R14B;FER;PARG;KDM4D;PHIP;FNIP1;FNIP2;PTK2;FKTN
regulation of cysteine-type endopeptidase activity involved in apoptotic process (GO:0043281)	24/93	0.540052	1	0	0	0.999863	0.616006	YWHAE;IGBP1;USP47;DDX3X;ARL6IP1;CSNK2A1;PDCD5;F2R;XIAP;HTRA2;TNFRSF10B;HMGB1;TRIAP1;SIRT1;THBS1;SH3RF1;RPS6KA3;DNAJB6;MYC;CASP1;CYCS;FNIP1;CD44;MAP3K5
positive regulation of transcription, DNA-templated (GO:0045893)	288/1120	0.542005	1	0	0	0.996292	0.610208	ATF1;ATF2;CCNK;CCNH;SCX;HNRNPU;CCNC;RBPJ;GABPB1;ELK3;PSMD9;RPS6KA3;TBK1;RPS6KA5;SOX15;MYC;CHEK2;CHEK1;HOXA5;IER2;CDK5RAP2;ACVR1;SMARCC1;RPL23;WDR75;MED4;MED6;NIF3L1;KARS;DDIT3;TBPL1;TFAM;ATF6;ATF3;ASF1A;ATF4;DHX9;PRKDC;CTR9;SUPT4H1;GATA4;WDR61;RTF1;BCL10;HIF1A;NUP85;MYO6;DHX36;XRCC6;JAG1;LIF;TRIP4;NR1D2;FOSL2;SETX;FOSL1;SNW1;HNRNPK;FUBP3;HNRNPD;CDK12;SETD3;CITED2;MED19;TCF20;RSF1;CTCF;BRCA1;EFCAB…
regulation of cell motility (GO:2000145)	28/109	0.548351	1	0	0	0.995276	0.598002	ROCK1;ROCK2;KIF14;ARHGAP18;NEXN;SPINT2;RND3;TTBK2;RND1;PARD6B;SLK;INPP5F;ABL2;HACE1;RCC2;MEMO1;NRG1;RHOC;RHOD;RHOA;CDK6;KIF2A;AMOTL2;PLXNB1;SGK3;PKN2;CRK;HBEGF
negative regulation of transcription from RNA polymerase II promoter (GO:0000122)	145/565	0.548564	1	0	0	0.994332	0.597049	TCERG1;KDM1A;WWC1;UBE2D3;WWC2;HNRNPU;RBPJ;IKZF5;RPS14;CCND1;SOX15;MYC;RPL23;OSR1;SARS;DICER1;THAP1;EID1;TBL1XR1;DDIT3;TRIB3;EZR;ATF3;CGGBP1;PPID;PSMD10;DLX1;DDX5;DLX4;MAX;CTR9;GLIS3;SUPT4H1;RTF1;PSEN1;MTDH;TPR;ORC2;SMYD2;SKIL;LYAR;BPTF;SMAD2;CBX8;DR1;UBE2I;SMAD3;CBX5;SMURF2;CBX2;PLK1;HMGA2;NR1D2;ESR2;DRAP1;NR4A2;EFNA1;DLG1;CNOT7;SNW1;CNOT1;CNOT2;MDM2;CALR;EZH2;SUV39H2;CITED2;SUV39H1;FHL2;OTUD7B;C…
negative regulation of epithelial cell proliferation (GO:0050680)	17/66	0.550963	1	0	0	0.997969	0.594878	MBD4;TGFB2;FBXW7;ATPIF1;TINF2;CASK;PTPRK;BRCA2;SYNJ2BP;THBS1;CDC73;AIMP1;CDK6;NFIB;MARVELD3;KRIT1;STRAP
purine ribonucleotide metabolic process (GO:0009150)	17/66	0.550963	1	0	0	0.997969	0.594878	HSPA8;OLA1;GNAI3;AK4;CROT;NT5C2;CLPX;HINT1;OPA1;IMPAD1;RAB23;FIGNL1;MFN1;NDUFS1;ADSS;RAN;EPHA2
protein dephosphorylation (GO:0006470)	32/125	0.555744	1	0	0	0.991864	0.582668	PPP1R15A;MTMR2;PTEN;PTPN21;PPP2R2A;PTPRK;DUSP18;RPAP2;CDC14B;MTM1;DUSP14;PPM1G;PPP1CB;PPP1CC;PPP3CA;PPP2CB;PPP3CB;PPP4R2;RPRD1A;NCK1;PPP1R12A;EYA1;PTPN11;PTPN12;DUSP9;CTTNBP2NL;PPM1A;PPM1B;UBLCP1;SDHAF2;PPP2R2D;PTPN2
protein tetramerization (GO:0051262)	23/90	0.562357	1	0	0	0.990142	0.569943	CPSF7;XRCC6;USP16;CPSF6;SHMT2;UXS1;SHMT1;ATPIF1;CBY1;HMGCR;PKD2;GLS;THG1L;IGF1R;CRYZ;RPS19;CTH;RCC1;TK1;DNM1L;FARSA;S100A10;FARSB
regulation of GTPase activity (GO:0043087)	48/188	0.562875	1	0	0	0.989226	0.568505	USP6NL;ITGB1;GSK3B;ARHGAP8;RABGAP1;RGS16;RAP1GDS1;SNX13;F11R;EFNA5;FGD1;SYDE2;FGD3;ARHGAP21;FGD4;RAP1A;FGD6;RACGAP1;LARS;SH3BP4;SNX9;SRGAP2;ECT2;EVI5;TBC1D15;S100A10;VAV3;ARFGEF1;CDKL5;CCL20;RCC2;F2R;RDX;OCRL;RRP1B;MUT;PTK2;ALS2;PLXNB1;ITGA6;EPHA1;RAPGEF6;CRK;ARHGEF5;RAB3GAP1;PICALM;EZH2;LIMS1
endocardial cushion development (GO:0003197)	5/19	0.567033	1	0	0	1.0196	0.578455	ACVR1;TGFB2;BMPR2;GATA4;BMPR1A
cellular polysaccharide biosynthetic process (GO:0033692)	5/19	0.567033	1	0	0	1.0196	0.578455	CSGALNACT1;CSGALNACT2;HAS2;B3GNT2;HS2ST1
regulation of neuron migration (GO:2001222)	5/19	0.567033	1	0	0	1.0196	0.578455	NIPBL;PLAA;ARHGEF2;KIF20B;SRGAP2
positive regulation of adherens junction organization (GO:1903393)	5/19	0.567033	1	0	0	1.0196	0.578455	COL16A1;ROCK1;PTPN23;S100A10;LIMS1
protein exit from endoplasmic reticulum (GO:0032527)	5/19	0.567033	1	0	0	1.0196	0.578455	VCP;CTAGE5;FAF2;DERL2;HSP90B1
negative regulation of signal transduction in absence of ligand (GO:1901099)	6/23	0.567188	1	0	0	1.01073	0.573149	IL1A;CSF2;EYA1;GDNF;UNC5B;BCL2
negative regulation of extrinsic apoptotic signaling pathway in absence of ligand (GO:2001240)	6/23	0.567188	1	0	0	1.01073	0.573149	IL1A;CSF2;EYA1;GDNF;UNC5B;BCL2
positive regulation of monooxygenase activity (GO:0032770)	6/23	0.567188	1	0	0	1.01073	0.573149	DHFR;NUS1;GDNF;PARK7;TERF2;HIF1A
regulation of androgen receptor signaling pathway (GO:0060765)	6/23	0.567188	1	0	0	1.01073	0.573149	DDX5;HDAC1;SAFB2;RNF6;PARK7;SIRT1
positive regulation of protein oligomerization (GO:0032461)	6/23	0.567188	1	0	0	1.01073	0.573149	SH3GLB1;BCL2L11;SNX9;IDE;RHOC;BID
positive regulation of mesonephros development (GO:0061213)	4/15	0.567618	1	0	0	1.03319	0.585103	PAX8;GDNF;SIX4;BASP1
L-alpha-amino acid transmembrane transport (GO:1902475)	4/15	0.567618	1	0	0	1.03319	0.585103	SLC7A5;SLC3A2;SLC7A1;SLC25A13
anterograde synaptic vesicle transport (GO:0048490)	4/15	0.567618	1	0	0	1.03319	0.585103	AP3M1;BLOC1S2;AP3B1;AP3S1
mesenchyme morphogenesis (GO:0072132)	4/15	0.567618	1	0	0	1.03319	0.585103	ACVR1;SMAD2;TGFB2;BMPR1A
negative regulation of release of cytochrome c from mitochondria (GO:0090201)	4/15	0.567618	1	0	0	1.03319	0.585103	PSMD10;OPA1;TRIAP1;FXN
positive regulation of phosphoprotein phosphatase activity (GO:0032516)	4/15	0.567618	1	0	0	1.03319	0.585103	PPP1R15A;PPP1R12A;HSP90AB1;CALM2
vasculature development (GO:0001944)	4/15	0.567618	1	0	0	1.03319	0.585103	ERRFI1;BMPR2;PIK3CA;FBXW7
regulation of protein complex disassembly (GO:0043244)	4/15	0.567618	1	0	0	1.03319	0.585103	MTRF1;OGFOD1;ETF1;IGF1R
negative regulation of protein processing (GO:0010955)	4/15	0.567618	1	0	0	1.03319	0.585103	PRNP;SNX12;CHAC1;THBS1
synaptic vesicle transport along microtubule (GO:0099517)	4/15	0.567618	1	0	0	1.03319	0.585103	AP3M1;BLOC1S2;AP3B1;AP3S1
regulation of cartilage development (GO:0061035)	4/15	0.567618	1	0	0	1.03319	0.585103	BMPR2;BMP1;TRPS1;SCX
cellular response to corticosteroid stimulus (GO:0071384)	4/15	0.567618	1	0	0	1.03319	0.585103	ANXA1;BCL2L11;HNRNPU;SSTR2
positive regulation of alpha-beta T cell activation (GO:0046635)	4/15	0.567618	1	0	0	1.03319	0.585103	HSPH1;IL23A;NKAP;GLI3
heparan sulfate proteoglycan biosynthetic process (GO:0015012)	4/15	0.567618	1	0	0	1.03319	0.585103	CSGALNACT1;GLCE;HS6ST1;HS2ST1
embryonic axis specification (GO:0000578)	4/15	0.567618	1	0	0	1.03319	0.585103	SMAD2;STIL;WNT7A;COBL
positive regulation of stress-activated protein kinase signaling cascade (GO:0070304)	4/15	0.567618	1	0	0	1.03319	0.585103	TGFB2;PDCD10;TAOK1;EIF2AK2
phosphatidylinositol phosphorylation (GO:0046854)	7/27	0.567762	1	0	0	1.00449	0.568596	PI4K2B;EFR3A;PIK3CA;PIK3C3;PIK3CB;PIK3C2A;FAM126A
endocytic recycling (GO:0032456)	7/27	0.567762	1	0	0	1.00449	0.568596	ARL4C;DENND1B;SNX4;MICALL2;PTPN23;SNF8;EPS15
protein destabilization (GO:0031648)	8/31	0.568587	1	0	0	0.999863	0.564523	PRNP;RNF139;CUL3;PLK1;MDM2;SENP2;SIRT1;CDC73
positive regulation of cellular component organization (GO:0051130)	27/106	0.568936	1	0	0	0.986893	0.556595	PPP1R15A;GSK3B;CD63;VCP;FAF1;CLSTN1;ASAP1;IL1RAP;PTPN23;IGF1R;CDC20;LMAN1;SUMO1;RPS3;FNIP1;FNIP2;SH3GLB1;CDT1;TGFB2;TMED9;WARS;BDNF;WNT7A;TGFBR1;DLG5;ATM;ATR
negative regulation of ryanodine-sensitive calcium-release channel activity (GO:0060315)	3/11	0.569648	1	0	0	1.05667	0.594628	GSTO1;PKD2;CALM2
positive regulation of extracellular matrix organization (GO:1903055)	3/11	0.569648	1	0	0	1.05667	0.594628	SMAD3;CLASP1;DDR2
calcineurin-NFAT signaling cascade (GO:0033173)	3/11	0.569648	1	0	0	1.05667	0.594628	PPP3CA;NFAT5;PPP3CB
brain morphogenesis (GO:0048854)	3/11	0.569648	1	0	0	1.05667	0.594628	PTEN;BBS4;PAFAH1B1
positive regulation of histone deacetylation (GO:0031065)	3/11	0.569648	1	0	0	1.05667	0.594628	NIPBL;ING2;AKAP8
calcium ion regulated exocytosis (GO:0017156)	3/11	0.569648	1	0	0	1.05667	0.594628	RIMS2;PPP3CB;VAMP7
regulation of hemopoiesis (GO:1903706)	3/11	0.569648	1	0	0	1.05667	0.594628	CSF2;CBFB;EIF2AK2
mitochondrion distribution (GO:0048311)	3/11	0.569648	1	0	0	1.05667	0.594628	HAP1;DNM1L;MTM1
lymphocyte mediated immunity (GO:0002449)	3/11	0.569648	1	0	0	1.05667	0.594628	JAG1;MSH2;GNL1
response to axon injury (GO:0048678)	3/11	0.569648	1	0	0	1.05667	0.594628	DHFR;FLRT3;MTR
stress granule assembly (GO:0034063)	3/11	0.569648	1	0	0	1.05667	0.594628	DDX3X;OGFOD1;BICD1
positive regulation of glycoprotein biosynthetic process (GO:0010560)	3/11	0.569648	1	0	0	1.05667	0.594628	SOAT1;CHORDC1;ALG10B
cellular response to interferon-beta (GO:0035458)	3/11	0.569648	1	0	0	1.05667	0.594628	PNPT1;HTRA2;UBE2K
regulation of synaptic vesicle cycle (GO:0098693)	3/11	0.569648	1	0	0	1.05667	0.594628	RIMS2;PREPL;RAB5A
negative regulation of release of sequestered calcium ion into cytosol (GO:0051280)	3/11	0.569648	1	0	0	1.05667	0.594628	GSTO1;PKD2;CALM2
response to thyroid hormone (GO:0097066)	3/11	0.569648	1	0	0	1.05667	0.594628	MBD4;CTSL;RDX
carbohydrate derivative catabolic process (GO:1901136)	3/11	0.569648	1	0	0	1.05667	0.594628	MGEA5;MANBA;FBXO2
glutathione biosynthetic process (GO:0006750)	3/11	0.569648	1	0	0	1.05667	0.594628	GGCT;CHAC2;CHAC1
midbrain dopaminergic neuron differentiation (GO:1904948)	3/11	0.569648	1	0	0	1.05667	0.594628	NR4A2;RYK;CTNNB1
regulation of mRNA polyadenylation (GO:1900363)	3/11	0.569648	1	0	0	1.05667	0.594628	RNF20;CTR9;ZC3H14
positive regulation of interferon-gamma biosynthetic process (GO:0045078)	3/11	0.569648	1	0	0	1.05667	0.594628	CEBPG;TLR3;CD276
positive regulation of endothelial cell apoptotic process (GO:2000353)	3/11	0.569648	1	0	0	1.05667	0.594628	PRKCI;PDCD4;THBS1
negative regulation of morphogenesis of an epithelium (GO:1905331)	3/11	0.569648	1	0	0	1.05667	0.594628	PTEN;PHLDB2;CLASP1
regulation of hydrogen peroxide-induced cell death (GO:1903205)	3/11	0.569648	1	0	0	1.05667	0.594628	NUP93;RIPK1;PARK7
protein localization to pre-autophagosomal structure (GO:0034497)	3/11	0.569648	1	0	0	1.05667	0.594628	STX17;ATG9B;TRAPPC8
intrinsic apoptotic signaling pathway in response to oxidative stress (GO:0008631)	3/11	0.569648	1	0	0	1.05667	0.594628	STK24;PDCD10;MAP3K5
regulation of non-canonical Wnt signaling pathway (GO:2000050)	3/11	0.569648	1	0	0	1.05667	0.594628	TIAM1;ZNRF3;CSNK1D
regulation of ventricular cardiac muscle cell action potential (GO:0098911)	3/11	0.569648	1	0	0	1.05667	0.594628	DSP;DLG1;DSG2
cellular response to insulin stimulus (GO:0032869)	28/110	0.570486	1	0	0	0.986228	0.553538	ATP6V1A;FOXC2;PRKDC;IDE;PIK3C2A;IGF1R;BAIAP2L1;ATP6V1H;AP3S1;ATP6V1D;ATP6V1C1;APPL1;RAB8B;PRKCI;ATP6V1G1;PARP1;DENND4C;MYO5A;RAB10;FER;RAB31;APC;RPS6KB1;MARS;PHIP;TRIB3;SOS1;PTPN2
inositol lipid-mediated signaling (GO:0048017)	10/39	0.570656	1	0	0	0.993453	0.557296	INPP5F;RPS6KB1;PIK3CA;PIK3C3;PIK3CB;PIK3C2A;EZR;RHOA;IGF1R;EXOC1
regulation of extrinsic apoptotic signaling pathway via death domain receptors (GO:1902041)	10/39	0.570656	1	0	0	0.993453	0.557296	CASP8;FEM1B;TNFAIP3;TNFRSF10B;FAS;RIPK1;BRCA1;ARHGEF2;THBS1;TANK
substantia nigra development (GO:0021762)	11/43	0.571807	1	0	0	0.991143	0.554002	YWHAE;CDC42;YWHAQ;HSPA5;BASP1;MAPKAP1;CCDC14;DYNLL1;CALM2;RHOA;YWHAH
regulation of multicellular organismal development (GO:2000026)	11/43	0.571807	1	0	0	0.991143	0.554002	TIAM1;NIPBL;RACGAP1;CDK1;SCX;TRIP12;HMGB1;SUPT6H;PHLDB2;CLASP1;TGFBR1
male gonad development (GO:0008584)	11/43	0.571807	1	0	0	0.991143	0.554002	ING2;TGFB2;KITLG;SIX4;MSH2;SOX15;CSDE1;NCOA4;GATA4;INHBA;MEA1
ATP hydrolysis coupled proton transport (GO:0015991)	2/7	0.575047	1	0	0	1.10699	0.612501	ATP6V1H;ATP1A1
phosphate ion transmembrane transport (GO:0035435)	2/7	0.575047	1	0	0	1.10699	0.612501	SLC20A1;XPR1
cellular response to interferon-alpha (GO:0035457)	2/7	0.575047	1	0	0	1.10699	0.612501	AXL;TPR
response to misfolded protein (GO:0051788)	2/7	0.575047	1	0	0	1.10699	0.612501	UBE2W;ATXN3
positive regulation of transmembrane transport (GO:0034764)	2/7	0.575047	1	0	0	1.10699	0.612501	PDCD5;AZIN1
negative regulation of interleukin-8 secretion (GO:2000483)	2/7	0.575047	1	0	0	1.10699	0.612501	ANXA1;ANXA4
ornithine transport (GO:0015822)	2/7	0.575047	1	0	0	1.10699	0.612501	SLC25A15;SLC7A1
regulation of mitochondrial membrane permeability involved in apoptotic process (GO:1902108)	2/7	0.575047	1	0	0	1.10699	0.612501	ATF2;THEM4
pri-miRNA transcription from RNA polymerase II promoter (GO:0061614)	2/7	0.575047	1	0	0	1.10699	0.612501	FOSL1;DDX5
translational readthrough (GO:0006451)	2/7	0.575047	1	0	0	1.10699	0.612501	SECISBP2L;TRNAU1AP
cellular response to sterol depletion (GO:0071501)	2/7	0.575047	1	0	0	1.10699	0.612501	ERLIN1;ERLIN2
protein import into mitochondrial inner membrane (GO:0045039)	2/7	0.575047	1	0	0	1.10699	0.612501	TIMM9;TIMM22
AMP metabolic process (GO:0046033)	2/7	0.575047	1	0	0	1.10699	0.612501	AK4;ADSS
tRNA 3'-end processing (GO:0042780)	2/7	0.575047	1	0	0	1.10699	0.612501	SSB;TRNT1
gas homeostasis (GO:0033483)	2/7	0.575047	1	0	0	1.10699	0.612501	WNT7B;HIF1A
activation of MAPKKK activity (GO:0000185)	2/7	0.575047	1	0	0	1.10699	0.612501	GADD45B;GADD45A
negative regulation of platelet-derived growth factor receptor-beta signaling pathway (GO:2000587)	2/7	0.575047	1	0	0	1.10699	0.612501	PTPN12;PTPN2
carnitine transport (GO:0015879)	2/7	0.575047	1	0	0	1.10699	0.612501	SLC25A15;PDZK1
amino-acid betaine transport (GO:0015838)	2/7	0.575047	1	0	0	1.10699	0.612501	SLC25A15;PDZK1
phosphorylated carbohydrate dephosphorylation (GO:0046838)	2/7	0.575047	1	0	0	1.10699	0.612501	IMPA1;PTEN
L-cysteine metabolic process (GO:0046439)	2/7	0.575047	1	0	0	1.10699	0.612501	AHCY;MTRR
negative regulation of protein kinase activity by regulation of protein phosphorylation (GO:0044387)	2/7	0.575047	1	0	0	1.10699	0.612501	NPM1;CDK5RAP3
vascular endothelial growth factor signaling pathway (GO:0038084)	2/7	0.575047	1	0	0	1.10699	0.612501	NUS1;FOXC1
regulation of histone H3-K9 acetylation (GO:2000615)	2/7	0.575047	1	0	0	1.10699	0.612501	CHEK1;BRCA1
attachment of GPI anchor to protein (GO:0016255)	2/7	0.575047	1	0	0	1.10699	0.612501	PIGK;PLAUR
positive regulation of NK T cell activation (GO:0051135)	2/7	0.575047	1	0	0	1.10699	0.612501	HSPH1;IL23A
regulation of interleukin-23 production (GO:0032667)	2/7	0.575047	1	0	0	1.10699	0.612501	CSF2;TLR4
inositol phosphate dephosphorylation (GO:0046855)	2/7	0.575047	1	0	0	1.10699	0.612501	IMPA1;PTEN
positive regulation of urine volume (GO:0035810)	2/7	0.575047	1	0	0	1.10699	0.612501	NPPB;HAS2
peroxisome proliferator activated receptor signaling pathway (GO:0035357)	2/7	0.575047	1	0	0	1.10699	0.612501	FAM120B;PDK3
zinc II ion transmembrane import (GO:0071578)	2/7	0.575047	1	0	0	1.10699	0.612501	SLC39A6;SLC39A14
regulation of alpha-beta T cell differentiation (GO:0046637)	2/7	0.575047	1	0	0	1.10699	0.612501	NKAP;GLI3
regulation by virus of viral protein levels in host cell (GO:0046719)	2/7	0.575047	1	0	0	1.10699	0.612501	DDB1;STAU1
regulation of RNA biosynthetic process (GO:2001141)	2/7	0.575047	1	0	0	1.10699	0.612501	MBD4;NMD3
regulation of meiotic nuclear division (GO:0040020)	2/7	0.575047	1	0	0	1.10699	0.612501	NPM2;FBXO5
positive regulation of RIG-I signaling pathway (GO:1900246)	2/7	0.575047	1	0	0	1.10699	0.612501	DDX60;PUM2
negative regulation of receptor internalization (GO:0002091)	2/7	0.575047	1	0	0	1.10699	0.612501	SDCBP;MTMR2
positive regulation of neuroblast proliferation (GO:0002052)	2/7	0.575047	1	0	0	1.10699	0.612501	FZD3;CTNNB1
negative regulation of B cell apoptotic process (GO:0002903)	2/7	0.575047	1	0	0	1.10699	0.612501	BCL10;AURKB
regulation of toll-like receptor 3 signaling pathway (GO:0034139)	2/7	0.575047	1	0	0	1.10699	0.612501	TNFAIP3;TIRAP
dorsal aorta morphogenesis (GO:0035912)	2/7	0.575047	1	0	0	1.10699	0.612501	RBPJ;BMPR1A
vascular smooth muscle contraction (GO:0014829)	2/7	0.575047	1	0	0	1.10699	0.612501	EDN1;PIK3C2A
negative regulation of glycogen metabolic process (GO:0070874)	2/7	0.575047	1	0	0	1.10699	0.612501	GSK3B;PASK
copper ion import (GO:0015677)	2/7	0.575047	1	0	0	1.10699	0.612501	STEAP1;STEAP2
xenobiotic catabolic process (GO:0042178)	2/7	0.575047	1	0	0	1.10699	0.612501	GSTO1;CRYZ
lens fiber cell differentiation (GO:0070306)	2/7	0.575047	1	0	0	1.10699	0.612501	WNT7B;WNT7A
cellular response to platelet-derived growth factor stimulus (GO:0036120)	2/7	0.575047	1	0	0	1.10699	0.612501	MARS;HAS2
regulation of RNA polymerase II regulatory region sequence-specific DNA binding (GO:1903025)	2/7	0.575047	1	0	0	1.10699	0.612501	DDIT3;TAF1
positive regulation of myeloid cell apoptotic process (GO:0033034)	2/7	0.575047	1	0	0	1.10699	0.612501	PIK3CB;SIRT1
sensory organ morphogenesis (GO:0090596)	2/7	0.575047	1	0	0	1.10699	0.612501	NIPBL;GLI3
regulation of protein heterodimerization activity (GO:0043497)	2/7	0.575047	1	0	0	1.10699	0.612501	BCL2;NRG1
T-helper 1 type immune response (GO:0042088)	2/7	0.575047	1	0	0	1.10699	0.612501	HMGB1;TLR4
selenocysteine incorporation (GO:0001514)	2/7	0.575047	1	0	0	1.10699	0.612501	SECISBP2L;TRNAU1AP
hyperosmotic response (GO:0006972)	2/7	0.575047	1	0	0	1.10699	0.612501	ARHGEF2;TLR3
regulation of cellular response to insulin stimulus (GO:1900076)	2/7	0.575047	1	0	0	1.10699	0.612501	VWA2;NUCKS1
positive regulation of neurological system process (GO:0031646)	2/7	0.575047	1	0	0	1.10699	0.612501	PARD3;DICER1
positive regulation of gastrulation (GO:2000543)	2/7	0.575047	1	0	0	1.10699	0.612501	OSR1;SCX
chondroitin sulfate proteoglycan metabolic process (GO:0050654)	2/7	0.575047	1	0	0	1.10699	0.612501	CSGALNACT1;CSGALNACT2
substrate-dependent cell migration, cell extension (GO:0006930)	2/7	0.575047	1	0	0	1.10699	0.612501	SDCBP;CD2AP
histone H3-K4 demethylation (GO:0034720)	2/7	0.575047	1	0	0	1.10699	0.612501	KDM5A;KDM1A
axon regeneration (GO:0031103)	2/7	0.575047	1	0	0	1.10699	0.612501	DHFR;MTR
positive regulation of dendritic spine morphogenesis (GO:0061003)	2/7	0.575047	1	0	0	1.10699	0.612501	CAPRIN1;LRP8
venous blood vessel development (GO:0060841)	2/7	0.575047	1	0	0	1.10699	0.612501	CCBE1;BMPR2
erythrocyte development (GO:0048821)	2/7	0.575047	1	0	0	1.10699	0.612501	MBD4;LYAR
ATP hydrolysis coupled cation transmembrane transport (GO:0099132)	2/7	0.575047	1	0	0	1.10699	0.612501	ATP6V1H;ATP1A1
positive regulation of lipid transport (GO:0032370)	2/7	0.575047	1	0	0	1.10699	0.612501	SPP1;TRIAP1
negative regulation of MyD88-independent toll-like receptor signaling pathway (GO:0034128)	2/7	0.575047	1	0	0	1.10699	0.612501	TLR4;TLR3
negative regulation of glial cell apoptotic process (GO:0034351)	2/7	0.575047	1	0	0	1.10699	0.612501	PRKCI;PRKCA
regulation of dendritic spine maintenance (GO:1902950)	2/7	0.575047	1	0	0	1.10699	0.612501	PRNP;VPS35
positive regulation of histone H3-K9 methylation (GO:0051574)	2/7	0.575047	1	0	0	1.10699	0.612501	INSL6;SIRT1
dorsal aorta development (GO:0035907)	2/7	0.575047	1	0	0	1.10699	0.612501	RBPJ;BMPR1A
positive regulation of mast cell degranulation (GO:0043306)	2/7	0.575047	1	0	0	1.10699	0.612501	SNX4;VAMP7
regulation of lymphocyte migration (GO:2000401)	2/7	0.575047	1	0	0	1.10699	0.612501	MSN;WASL
positive regulation of epithelial cell differentiation involved in kidney development (GO:2000698)	2/7	0.575047	1	0	0	1.10699	0.612501	PAX8;LIF
positive regulation of extracellular matrix disassembly (GO:0090091)	2/7	0.575047	1	0	0	1.10699	0.612501	CLASP1;DDR2
regulation of low-density lipoprotein particle clearance (GO:0010988)	2/7	0.575047	1	0	0	1.10699	0.612501	HNRNPK;CNPY2
nucleic acid transport (GO:0050657)	2/7	0.575047	1	0	0	1.10699	0.612501	HNRNPA2B1;CKAP5
nuclear body organization (GO:0030575)	2/7	0.575047	1	0	0	1.10699	0.612501	SRPK2;USPL1
negative regulation of osteoblast proliferation (GO:0033689)	2/7	0.575047	1	0	0	1.10699	0.612501	EIF2AK2;PLXNB1
positive regulation of autophagy of mitochondrion (GO:1903599)	2/7	0.575047	1	0	0	1.10699	0.612501	ATPIF1;PARK7
negative regulation of protein binding (GO:0032091)	17/67	0.579183	1	0	0	0.983074	0.536893	GSK3B;KDM1A;ROCK1;HSPA5;USP33;DDX11;PARK7;GTPBP4;AURKB;IFIT2;AURKA;TTBK2;GNL3L;MITD1;MAPRE1;GTSE1;NES
positive regulation of autophagy (GO:0010508)	17/67	0.579183	1	0	0	0.983074	0.536893	SH3GLB1;BNIP3L;SCOC;PRKAA1;ROCK1;PLK2;GNAI3;PIK3CB;PARK7;SIRT1;MTDH;TBK1;LARP1;SH3BP4;IKBKG;OPTN;PAFAH1B2
regulation of protein localization to plasma membrane (GO:1903076)	17/67	0.579183	1	0	0	0.983074	0.536893	ITGB1;PRKCI;ITGA3;STX8;CLTC;STX7;ARHGEF16;DLG1;CNPY4;KIF5B;STX3;SQSTM1;GBP1;PLS1;APPL1;EPHA2;PICALM
negative regulation of phosphorylation (GO:0042326)	19/75	0.581649	1	0	0	0.981532	0.53188	PRNP;ANKLE2;CDKN1B;WARS;TRAF3IP1;PRKDC;PRKRIP1;PTEN;FAM129A;HNRNPU;PARK7;INHBA;DYNLL1;SIRT1;IBTK;CHORDC1;DNAJC10;TARDBP;CDK5RAP3
regulation of transforming growth factor beta receptor signaling pathway (GO:0017015)	20/79	0.58287	1	0	0	0.980878	0.529469	SMAD2;HSP90AB1;SMAD3;SMURF2;CITED2;ITGA3;LEMD3;SIRT1;THBS1;TGFBR1;PPM1A;SDCBP;ING2;SNW1;SNX25;STRAP;RPS27A;SKIL;TRIM33;SNX6
positive regulation of cell migration (GO:0030335)	56/221	0.589559	1	0	0	0.981765	0.518745	DOCK5;BMPR2;CSF1;MIA3;LAMC2;CYR61;CCAR1;IGF1R;NIPBL;CAPN7;PLAU;FAM110C;CPNE3;GTSE1;ACVR1;EDN1;SPHK1;F2R;ADAM10;PRKCA;RHOD;TGFBR1;PTP4A1;TIAM1;PLAA;ITGA6;ARHGEF2;KIF20B;EPHA1;MAPRE1;DDR2;HBEGF;SEMA3E;HIF1A;THBS1;RTN4;FAM83H;SDCBP;PAK1;GPNMB;PDCD10;PDGFC;HAS2;CLASP1;SPAG9;TGFB2;HSPA5;SMURF2;RDX;ELP3;LAMB1;PTK2;RAB11A;FER;APC;FGFR1OP
cellular protein localization (GO:0034613)	83/327	0.591914	1	0	0	0.983427	0.515704	USP6NL;VPS29;ZFYVE9;CLTC;SNX13;PTPRK;BICD1;RAB22A;SEPT8;NIPBL;SEPT7;CEP250;TLK1;ARFIP1;VPS35;TMED7;TMED5;BBS4;WLS;RAB8B;YWHAH;TMED9;MIOS;ATG9B;STX8;COG3;STX7;AP3B1;SEPT2;TBC1D1;RRAGA;ZFYVE16;RAB31;RRAGC;CTTN;RABL3;PIGK;PICK1;ARHGEF2;EZR;SLU7;GAS8;STX12;CD63;NAPB;COPB2;COPA;SEH1L;RABGAP1;STX17;USO1;VPS26A;RAB21;SNX1;SNX27;RAB23;MYO6;SNX9;STX3;TBC1D12;RAB28;RAB6B;EVI5;TBC1D15;SNX6;TBC1D8B;SEPT10;RA…
mitochondrial transport (GO:0006839)	34/135	0.598806	1	0	0	0.975792	0.500404	TIMM9;ATP5H;ATP5O;MFF;TOMM20;TOMM22;HSPD1;CHCHD4;SLC25A27;SLC25A48;SAMM50;GRPEL1;PITRM1;GRPEL2;TIMM17A;SLC25A40;SLC25A43;VPS35;SLC25A24;HSP90AA1;PNPT1;HSPA4;MTX2;TIMM22;SLC25A15;SLC25A37;BCL2;SLC25A30;TOMM7;SLC25A32;SLC25A14;SLC25A36;TOMM5;SLC25A13
positive regulation of cell-substrate adhesion (GO:0010811)	13/52	0.605696	1	0	0	0.968617	0.485642	GSK3B;DOCK5;CSF1;PLEKHA2;NPNT;CDC42;CDK6;CALR;JAK2;EPHA1;CRK;S100A10;LIMS1
positive regulation of proteolysis (GO:0045862)	13/52	0.605696	1	0	0	0.968617	0.485642	CCBE1;HDAC2;WDR48;RHBDD1;ATPIF1;PLK1;TANK;CASP8;ASPH;PERP;ADAM9;SNX9;SH3D19
regulation of epithelial cell migration (GO:0010632)	12/48	0.605763	1	0	0	0.968617	0.485536	DOCK5;TGFB2;BMPR2;CAPN7;MARVELD3;STRAP;PTPN23;HIF1A;RTN4;CLASP1;RAB11A;PTK2
phosphatidylinositol-mediated signaling (GO:0048015)	14/56	0.605783	1	0	0	0.968617	0.485503	EDN1;LTK;PLEKHA1;PIK3CB;PIK3C2A;RHOA;IGF1R;PIK3CA;INPP5F;RPS6KB1;TYRO3;PIK3C3;EZR;EXOC1
regulation of stress fiber assembly (GO:0051492)	15/60	0.605992	1	0	0	0.968617	0.485169	ROCK1;ROCK2;RHOA;TGFBR1;CTGF;CDC42;PAK1;STMN1;ALMS1;EPHA1;PHLDB2;MET;ARHGEF5;CLASP1;S100A10
negative regulation of type I interferon production (GO:0032480)	11/44	0.606023	1	0	0	0.968617	0.485119	CYLD;ITCH;PPM1B;TBK1;TRAF3IP1;PCBP2;TAX1BP1;TNFAIP3;TRIM25;ISG15;RPS27A
protein N-linked glycosylation via asparagine (GO:0018279)	11/44	0.606023	1	0	0	0.968617	0.485119	LMAN1;VCP;FUT8;TUSC3;OSTC;ALG5;ST3GAL4;STT3A;MAGT1;UGGT1;UBE2J1
carboxylic acid biosynthetic process (GO:0046394)	11/44	0.606023	1	0	0	0.968617	0.485119	NANP;UGDH;UGP2;GLS2;GOT2;ATPIF1;RGN;HAS2;ASNS;ALDH18A1;GLS
myeloid cell differentiation (GO:0030099)	11/44	0.606023	1	0	0	0.968617	0.485119	HSPA9;RPS14;DYRK3;CSF3;RPS19;CASP3;ATPIF1;INHBA;JAK2;TIRAP;PTPN2
regulation of cellular localization (GO:0060341)	10/40	0.606534	1	0	0	0.968617	0.484303	CAMK2D;PARD6B;KDM1A;PARP1;SPAG5;STXBP4;FMR1;WWC1;EFNA5;MAD1L1
negative regulation of ERK1 and ERK2 cascade (GO:0070373)	10/40	0.606534	1	0	0	0.968617	0.484303	RPS6KA6;DLG1;CNKSR3;PTEN;RANBP9;SYNJ2BP;EZR;GBP1;TLR4;PTPN2
regulation of cholesterol biosynthetic process (GO:0045540)	10/40	0.606534	1	0	0	0.968617	0.484303	SQLE;PRKAA1;GGPS1;NFYB;ERLIN1;HMGCR;ERLIN2;MBTPS2;KPNB1;RAN
embryonic heart tube morphogenesis (GO:0003143)	10/40	0.606534	1	0	0	0.968617	0.484303	ACVR1;CCDC39;AHI1;STIL;SETDB2;GATA4;BBS7;PKD2;BBS5;BBS4
positive regulation of epithelial to mesenchymal transition (GO:0010718)	10/40	0.606534	1	0	0	0.968617	0.484303	ACVR1;SMAD2;SDCBP;TIAM1;FOXC1;TGFB2;SMAD3;CTNNB1;TGFBR1;EZH2
heart looping (GO:0001947)	9/36	0.607374	1	0	0	0.968617	0.482963	CCDC39;AHI1;STIL;SETDB2;GATA4;BBS7;PKD2;BBS5;BBS4
positive regulation of stress-activated MAPK cascade (GO:0032874)	20/80	0.608203	1	0	0	0.968617	0.481642	TGFB2;GADD45B;PRMT1;GADD45A;WNT7B;DUSP19;AXIN1;EIF2AK2;WNT7A;HMGB1;TPD52L1;TIRAP;CTGF;IL1A;SDCBP;KARS;PDCD10;TAOK1;RIPK1;MAP3K5
dendrite morphogenesis (GO:0048813)	8/32	0.608657	1	0	0	0.968617	0.480919	CDC42;FARP1;SDC2;BTBD3;PTEN;WNT7A;WASL;PAK3
microtubule bundle formation (GO:0001578)	8/32	0.608657	1	0	0	0.968617	0.480919	LRGUK;CLIP1;SPAST;CHORDC1;PLK1;KIF20A;CLASP1;CDK5RAP2
negative regulation of receptor activity (GO:2000272)	8/32	0.608657	1	0	0	0.968617	0.480919	ERRFI1;TSG101;GPRC5A;GSTO1;PKD2;CALM2;SOCS4;SNX6
GPI anchor biosynthetic process (GO:0006506)	8/32	0.608657	1	0	0	0.968617	0.480919	PIGN;PIGA;PLAUR;PIGK;CWH43;PIGW;PIGG;PIGF
positive regulation of TOR signaling (GO:0032008)	8/32	0.608657	1	0	0	0.968617	0.480919	RRAGA;SEH1L;MIOS;PIK3CA;RRAGC;LARS;RHEB;RICTOR
regulation of cell-cell adhesion (GO:0022407)	8/32	0.608657	1	0	0	0.968617	0.480919	JAG1;CITED2;CDH1;SPINT2;EFNA5;GTPBP4;PTK2;ADA
positive regulation of transcription factor import into nucleus (GO:0042993)	8/32	0.608657	1	0	0	0.968617	0.480919	CSF3;SMAD3;CDH1;IL23A;SPHK1;TLR4;RHOA;TLR3
regulation of nitric oxide biosynthetic process (GO:0045428)	8/32	0.608657	1	0	0	0.968617	0.480919	EDN1;HSP90AA1;HSP90AB1;SMAD3;DDAH1;PKD2;PTGS2;TLR4
positive regulation of myeloid leukocyte differentiation (GO:0002763)	8/32	0.608657	1	0	0	0.968617	0.480919	CASP8;HAX1;CSF1;IL23A;LIF;RIPK1;PRKCA;POU4F1
positive regulation of dendrite development (GO:1900006)	8/32	0.608657	1	0	0	0.968617	0.480919	CDKL5;FMR1;CAPRIN1;DLG5;COBL;PSEN1;LLPH;LRP8
positive regulation of supramolecular fiber organization (GO:1902905)	21/84	0.608794	1	0	0	0.968617	0.480701	NCKAP1;CSF3;EDN1;SLAIN2;PSEN1;CLIP1;PAK1;FER;BAIAP2L1;NAV3;CTTN;CFL2;TRPV4;AKAP9;CDC42EP3;RPS3;MAPRE1;MET;CLASP1;CDK5RAP2;NCK1
negative regulation of intracellular steroid hormone receptor signaling pathway (GO:0033144)	7/28	0.610554	1	0	0	0.968617	0.477904	HDAC1;CNOT1;CNOT2;BRCA1;CALR;SIRT1;STRN3
cellular response to alcohol (GO:0097306)	7/28	0.610554	1	0	0	0.968617	0.477904	BLM;LARP1;RAD51;CDH1;CTNNA1;CTNNB1;BRCA1
negative regulation of homeostatic process (GO:0032845)	7/28	0.610554	1	0	0	0.968617	0.477904	HSPA9;ERCC1;BCL2;TNFAIP3;BCL10;TERF2;HOXA5
regulation of transmembrane receptor protein serine/threonine kinase signaling pathway (GO:0090092)	7/28	0.610554	1	0	0	0.968617	0.477904	SMAD2;FKBP1A;SMAD3;SMURF2;ITGA3;XIAP;TRIM33
positive regulation of cell communication (GO:0010647)	7/28	0.610554	1	0	0	0.968617	0.477904	RIMS2;EDN1;HOMER1;CLSTN1;PTPN23;CDKN2AIP;WLS
regulation of defense response to virus by virus (GO:0050690)	7/28	0.610554	1	0	0	0.968617	0.477904	AP1S2;AP1S1;ATP6V1H;EIF2AK2;AP1S3;AP2B1;PAK2
positive regulation of phosphate metabolic process (GO:0045937)	7/28	0.610554	1	0	0	0.968617	0.477904	SDCBP;PTGES3;GLMN;ITGA6;BCL10;PSEN1;THBS1
cellular modified amino acid biosynthetic process (GO:0042398)	6/24	0.613338	1	0	0	0.968617	0.473498	GGCT;PLSCR1;ATPIF1;PLOD2;CHAC2;CHAC1
macromolecule modification (GO:0043412)	6/24	0.613338	1	0	0	0.968617	0.473498	SETD5;PARP1;PARN;ST3GAL4;CHD1;LRPPRC
negative regulation of oxidative stress-induced cell death (GO:1903202)	6/24	0.613338	1	0	0	0.968617	0.473498	NUP93;BAG5;HTRA2;PARK7;SIRT1;ATF4
negative regulation of T cell proliferation (GO:0042130)	6/24	0.613338	1	0	0	0.968617	0.473498	PRNP;SDC4;GPNMB;DLG5;GLMN;RC3H1
negative regulation of intrinsic apoptotic signaling pathway in response to DNA damage (GO:1902230)	6/24	0.613338	1	0	0	0.968617	0.473498	ING2;KDM1A;TAF9;TRIAP1;SIRT1;CD44
membrane protein intracellular domain proteolysis (GO:0031293)	6/24	0.613338	1	0	0	0.968617	0.473498	JAG1;RHBDD1;ADAM10;YBX1;PSEN1;MBTPS2
negative regulation of innate immune response (GO:0045824)	5/20	0.617466	1	0	0	0.968617	0.467	CNOT7;RPS19;TYRO3;TNFAIP3;PTPN2
Golgi to endosome transport (GO:0006895)	5/20	0.617466	1	0	0	0.968617	0.467	KIF16B;VPS13A;AP1AR;EPS15;KLHL20
regulation of epidermal cell differentiation (GO:0045604)	5/20	0.617466	1	0	0	0.968617	0.467	ERRFI1;ROCK1;CBFB;ROCK2;CTSL
positive regulation of gene silencing by miRNA (GO:2000637)	5/20	0.617466	1	0	0	0.968617	0.467	FXR1;DDX5;DHX9;FMR1;PUM2
branching involved in ureteric bud morphogenesis (GO:0001658)	5/20	0.617466	1	0	0	0.968617	0.467	PAX8;GDNF;MYC;NPNT;PKD2
inositol phosphate-mediated signaling (GO:0048016)	5/20	0.617466	1	0	0	0.968617	0.467	NFAT5;PPP3CA;EDN1;PPP3CB;DHX8
negative regulation of interferon-gamma production (GO:0032689)	5/20	0.617466	1	0	0	0.968617	0.467	PRNP;AXL;INHBA;HMGB1;TLR4
cellular response to estradiol stimulus (GO:0071392)	5/20	0.617466	1	0	0	0.968617	0.467	H2AFZ;RUVBL2;NRIP1;SSTR2;POU4F1
regulation of transport (GO:0051049)	5/20	0.617466	1	0	0	0.968617	0.467	YRDC;WWC1;MYO6;TRIB3;RAB11A
positive regulation of interleukin-2 production (GO:0032743)	5/20	0.617466	1	0	0	0.968617	0.467	IL1A;ANXA1;GLMN;RPS3;TANK
negative regulation of intracellular protein transport (GO:0090317)	5/20	0.617466	1	0	0	0.968617	0.467	BARD1;MDFIC;CHORDC1;PARK7;RANGAP1
ureteric bud morphogenesis (GO:0060675)	5/20	0.617466	1	0	0	0.968617	0.467	PAX8;GDNF;MYC;NPNT;PKD2
wound healing, spreading of cells (GO:0044319)	5/20	0.617466	1	0	0	0.968617	0.467	PDCD10;RHOC;RHOA;CYR61;CD44
MAPK cascade (GO:0000165)	70/278	0.618247	1	0	0	0.975585	0.469127	YWHAE;CSF2;YWHAB;PSMD9;PSMD6;SPRED1;PSMD7;PSMD5;MYC;PSMD2;PSMD1;ITGAV;IKBKG;JAK2;MAP3K5;CHUK;FRS2;NRG1;DUSP9;RBX1;PSMA5;PSMA6;PSMA3;PSMA4;KARS;PSMA1;PSMA2;RASA1;AKAP9;PSME4;RASA2;PSME1;PSME2;SOS1;MET;HBEGF;PSMD10;PSMD12;CAMK2D;PSMD11;PSMD14;CUL3;CUL1;RASAL2;PSMA7;NRAS;PSMB1;TPR;MAPK1;RPS27A;MAP4K5;MARK3;MAP4K3;MAP4K4;MBD4;RANBP9;PTK2;MAPK13;SETX;FGF17;PSMC5;KITLG;PSMC6;PSMC3;STK24;GDNF;ARTN;PSMC1…
positive regulation of nuclear-transcribed mRNA catabolic process, deadenylation-dependent decay (GO:1900153)	4/16	0.623784	1	0	0	0.968617	0.45714	CNOT7;CNOT1;POLR2G;PABPC1
Notch receptor processing (GO:0007220)	4/16	0.623784	1	0	0	0.968617	0.45714	JAG1;ADAM10;YBX1;PSEN1
DNA methylation or demethylation (GO:0044728)	4/16	0.623784	1	0	0	0.968617	0.45714	DNMT1;MTRR;ATRX;BEND3
regulation of osteoblast proliferation (GO:0033688)	4/16	0.623784	1	0	0	0.968617	0.45714	EIF2AK2;PLXNB1;RHOA;CYR61
regulation of SMAD protein import into nucleus (GO:0060390)	4/16	0.623784	1	0	0	0.968617	0.45714	NUP93;SMAD3;TGFBR1;BMPR1A
positive regulation of nitric-oxide synthase activity (GO:0051000)	4/16	0.623784	1	0	0	0.968617	0.45714	DHFR;NUS1;TERF2;HIF1A
odontogenesis of dentin-containing tooth (GO:0042475)	4/16	0.623784	1	0	0	0.968617	0.45714	FOXC1;HDAC2;HDAC1;ANKRD11
positive regulation of G1/S transition of mitotic cell cycle (GO:1900087)	4/16	0.623784	1	0	0	0.968617	0.45714	DDX3X;CDC45;RDX;CDC6
protein localization to chromatin (GO:0071168)	4/16	0.623784	1	0	0	0.968617	0.45714	NIPBL;RAD21;RUVBL2;PLK1
endoplasmic reticulum to cytosol transport (GO:1903513)	4/16	0.623784	1	0	0	0.968617	0.45714	VCP;FAF2;DERL2;HSP90B1
regulation of interferon-alpha production (GO:0032647)	4/16	0.623784	1	0	0	0.968617	0.45714	SETD2;TBK1;TLR4;HSPD1
[truncated: 2,528 more rows]

## Sheet: up KEGG
Table S7: Gene set and pathway enrichment in differentially expressed genes of 4T1 cells for upregulated and downregulated genes in GO gene sets and KEGG pathways, respectively (sheets are labelled “up GO”, “up KEGG”, “down GO” and “down KEGG”, respectively).
Term	Overlap	P-value	Adjusted P-value	Old P-value	Old Adjusted P-value	Odds Ratio	Combined Score	Genes
Cell cycle	81/123	1.07095e-20	3.24499e-18	0	0	2.55148	117.325	YWHAE;GSK3B;CDKN1B;MCM7;CCNH;YWHAB;BUB1B;SMC3;CDC14B;CDC20;CDC23;CCND1;PTTG1;YWHAQ;CHEK2;MYC;CHEK1;CDC27;SKP2;SKP1A;YWHAH;CDC25C;SMC1A;YWHAZ;CDC25A;RBX1;CCNA2;TFDP1;RBL1;DBF4;CCNE2;TFDP2;ESPL1;MCM3;ANAPC4;MCM4;MCM5;MCM6;MAD1L1;ANAPC1;MCM2;HDAC2;PCNA;PRKDC;HDAC1;CUL1;TTK;ANAPC10;ORC5;CCNB2;ORC4;CCNB1;ORC6;CDC45;ORC1;RAD21;ORC3;ORC2;E2F1;E2F3;BUB1;SMAD2;TGFB2;SMAD3;GADD45B;GADD45A;PLK1;CDC7;CDC6;ST…
RNA transport	100/167	1.16311e-20	1.76211e-18	0	0	2.32004	106.491	EIF4A2;CYFIP1;EIF4A1;NUP107;POP1;FMR1;RPP30;EIF4A3;PHAX;PNN;MAGOH;RPP38;EIF1AX;THOC1;THOC3;THOC2;TRNT1;THOC5;THOC7;SRRM1;NUP93;EEF1A1;CLNS1A;GEMIN4;GEMIN5;GEMIN6;NUP98;EIF1A;GEMIN8;KPNB1;NUP205;POM121;SEH1L;RBM8A;NMD3;NUP160;FXR1;NUP85;TPR;NUP88;EIF2S3X;SMN1;EIF2B3;UBE2I;NUP155;RPP40;UPF3B;UPF3A;NUP153;EIF2S2;MAGOHB;EIF2S1;SNUPN;EIF1;EIF5;RNPS1;EIF4G2;NXT1;NXT2;XPO1;SUMO1;SUMO3;SUMO2;XPO5;UPF2;EI…
Spliceosome	84/132	5.67054e-20	5.72724e-18	0	0	2.46557	109.265	ISY1;TCERG1;RBM25;DDX46;EIF4A3;DDX42;HNRNPU;USP39;EFTUD2;SART1;SNRPD2;SNRPD1;MAGOH;DHX15;SNRPD3;BCAS2;RBM17;AQR;NCBP1;NCBP2;BUD31;THOC1;THOC3;PRPF40A;THOC2;PLRG1;WBP11;CRNKL1;CDC40;PRPF4;PRPF6;PRPF18;SYF2;PRPF3;SNRPG;SRSF3;SNRNP27;PPIE;PPIH;SNRPE;SNRPA1;SNRPF;SRSF5;SNRNP200;SRSF7;SLU7;RBM22;DDX5;SF3B2;SF3B3;DHX8;RBM8A;SRSF1;DDX23;U2AF1;PRPF8;ZMAT2;TRA2B;TRA2A;DHX38;SNRPB2;HNRNPA1;SF3B1;SRSF10;SMN…
Ribosome	95/170	6.84301e-17	5.18358e-15	0	0	2.16514	80.5882	RPL4;MRPS17;RPL5;RPL30;RPL3;RPL32;RPL31;MRPS14;RPL34;MRPS11;RPLP0;MRPS10;RPL8;RPL9;RPL6;MRPL32;RPL7;MRPL33;RPS15;RPS4X;RPS14;MRPL3;RPL7A;RPS17;RPS16;MRPL1;RPS19;RPL36AL;RPS18;RPL35;RPLP2;RPL38;RPL37;MRPL9;RPS11;RPL39;RPS10;RPS13;RPS12;RPS9;RPL21;RPS7;RPS8;RPL23;RPL22;RPS6;MRPS18A;RPL13A;MRPS21;MRPS7;MRPS18C;MRPS9;RPL37A;RPL24;RPL27;RPL26;RPL29;RPL28;RPL10;MRPL18;RPL12;MRPL19;RPL11;MRPL16;RPL36A;R…
DNA replication	30/35	1.64872e-13	9.99127e-12	0	0	3.32097	97.7482	PRIM2;FEN1;RNASEH2B;RNASEH2A;PCNA;MCM7;PRIM1;POLD3;POLE;RFC5;RFC3;RFC4;LIG1;RFC1;RFC2;RPA1;RPA2;POLE4;POLA1;POLA2;RPA3;POLE2;POLE3;MCM3;MCM4;MCM5;MCM6;SSBP1;DNA2;MCM2
Nucleotide excision repair	31/43	2.71072e-10	1.36892e-08	0	0	2.79322	61.5308	PCNA;CCNH;CETN2;XPC;POLD3;POLE;RFC5;RFC3;RFC4;LIG1;RFC1;RFC2;RPA1;RPA2;GTF2H1;GTF2H2;RAD23B;GTF2H5;RBX1;CUL4A;DDB1;POLE4;RPA3;ERCC1;POLE2;POLE3;ERCC8;ERCC5;ERCC6;MNAT1;CUL4B
Mismatch repair	19/22	4.32226e-09	1.87092e-07	0	0	3.34613	64.4448	RFC5;RFC3;PCNA;RFC4;LIG1;RFC1;RFC2;RPA1;RPA2;MLH1;MLH3;POLD3;MSH6;MSH2;EXO1;MSH3;RPA3;PMS2;SSBP1
Basal transcription factors	27/43	3.52599e-07	1.33547e-05	0	0	2.43281	36.1465	GTF2A2;CCNH;GTF2B;TAF9;GTF2E1;GTF2E2;TAF5L;TAF7L;GTF2I;TBP;TAF15;TAF12;TAF13;TAF11;GTF2H1;GTF2H2;GTF2F1;GTF2F2;GTF2H5;TBPL1;TAF7;GTF2IRD1;TAF5;MNAT1;TAF3;TAF2;TAF1
Fanconi anemia pathway	30/51	6.13144e-07	2.06425e-05	0	0	2.2791	32.6017	BLM;WDR48;BRCA1;BRCA2;BRIP1;EME1;REV3L;USP1;POLI;PMS2;POLK;POLH;FANCI;FANCM;RMI1;FANCL;REV1;FANCA;RPA1;RPA2;FANCB;MLH1;PALB2;RAD51C;RAD51;FANCD2;UBE2T;RPA3;ERCC1;ATR
Homologous recombination	25/41	2.10706e-06	6.38438e-05	0	0	2.36248	30.8781	BLM;BRCC3;BRCA1;BRCA2;RAD54B;POLD3;BRIP1;EME1;UIMC1;RBBP8;RAD54L;NBN;TOPBP1;BARD1;XRCC2;RPA1;RPA2;MRE11A;PALB2;RAD50;RAD51C;RAD51;RPA3;ATM;SSBP1
RNA polymerase	18/28	2.05273e-05	0.000565435	0	0	2.49073	26.8843	POLR3A;POLR2A;POLR3B;POLR2B;POLR1A;POLR3D;POLR1B;TWISTNB;POLR1C;POLR3F;POLR1D;POLR2F;POLR1E;POLR3G;POLR2G;POLR2H;POLR2J;POLR3K
Ribosome biogenesis in eukaryotes	50/115	2.82546e-05	0.000713428	0	0	1.68455	17.6444	RBM28;NXT1;POP1;NVL;RPP30;WDR3;FCF1;PWP2;NXT2;WDR43;FBL;XPO1;NOB1;RIOK2;RIOK1;UTP14A;RPP38;UTP14B;UTP15;WDR36;CSNK2A1;CSNK2A2;WDR75;GNL2;UTP18;GTPBP4;GNL3;LSG1;XRN1;DKC1;XRN2;SBDS;NHP2;HEATR1;NMD3;SPATA5;EMG1;TCOF1;BMS1;GAR1;DROSHA;MDN1;NOP56;NOP58;UTP6;RPP40;RCL1;GNL3L;MPHOSPH10;RAN
RNA degradation	38/83	6.49463e-05	0.00151375	0	0	1.77385	17.1034	BTG4;BTG3;DDX6;BTG1;PARN;WDR61;ENO4;HSPD1;EXOSC7;EXOSC10;EXOSC9;EXOSC8;DHX36;EXOSC3;EXOSC2;DCPS;EXOSC1;HSPA9;TTC37;CNOT6L;PNPT1;DIS3;PABPC4;LSM1;LSM5;LSM3;CNOT6;CNOT7;LSM6;XRN1;CNOT1;CNOT2;XRN2;C1D;PABPC2;PABPC1;DCP2;MPHOSPH6
Protein export	17/28	0.000100187	0.00216834	0	0	2.35236	21.6616	SRP19;HSPA5;SRPR;SRP68;SRP14;SRP9;IMMP1L;SPCS3;SPCS2;SRP72;SEC61G;SRP54B;SRP54C;SEC62;SEC11A;SEC63;SEC11C
mRNA surveillance pathway	42/96	0.000100535	0.00203082	0	0	1.69508	15.6032	HBS1L;NXT1;RBM8A;RNMT;CSTF3;EIF4A3;CSTF2;CSTF2T;PPP2R2A;NXT2;GSPT1;PPP1CB;PNN;PPP1CC;PPP2CB;FIP1L1;PPP2R5E;PCF11;PPP2R3C;PAPOLG;MAGOH;PAPOLA;UPF2;CPSF7;CPSF6;RNGTT;NCBP1;NCBP2;PABPC4;CPSF3;CPSF2;UPF3B;UPF3A;PPP2R5C;MAGOHB;SRRM1;WDR33;PPP2R2D;PABPC2;ETF1;RNPS1;PABPC1
Ubiquitin mediated proteolysis	56/138	0.000101381	0.00191989	0	0	1.57225	14.4594	UBE3C;UBE2D3;BRCA1;UBE2Z;CDC20;HERC4;CDC23;UBE2Q1;UBE2Q2;CDC27;SKP2;SKP1A;FBXW7;FBXO2;UBE2E1;UBE4A;UBE2QL1;UBE4B;SIAH1B;RBX1;DDB1;ANAPC4;ANAPC1;CUL5;UBA6;CUL3;CUL2;CUL1;XIAP;RNF7;ANAPC10;UBE2J1;UBR5;UBE2I;UBE2B;SMURF2;UBE2C;FANCL;UBE2G1;UBE2A;CUL4A;UBE2W;ITCH;UBE2S;NEDD4;CDC16;UBE2N;UBA3;MDM2;UBA2;ERCC8;TRIM37;TRIP12;SAE1;UBE2K;CUL4B
Proteasome	24/46	0.000118048	0.00210404	0	0	2.02146	18.2829	PSMD12;PSMD11;PSMD14;POMP;PSMA7;PSMA5;PSMA6;PSMD6;PSMC5;PSMA3;PSMD7;PSMC6;PSMA4;PSMC3;PSMA1;PSMA2;PSMD2;PSMC1;PSMB1;PSMC2;PSME4;PSME1;PSMD1;PSME2
Oocyte meiosis	48/116	0.000176974	0.00297906	0	0	1.60323	13.8511	YWHAE;CAMK2D;YWHAB;CUL1;SMC3;ANAPC10;IGF1R;AURKA;CDC20;PPP1CB;PPP1CC;RPS6KA3;CCNB2;PPP3CA;PPP2CB;RPS6KA6;CCNB1;PPP3CB;SLK;CDC23;PTTG1;YWHAQ;PPP2R5E;CDC27;MAPK1;FBXO5;SKP1A;PRKACB;BUB1;YWHAH;PLK1;PPP2R5C;CDC25C;SMC1A;YWHAZ;RBX1;SGO1;CCNE2;ESPL1;CDC16;CDK2;SPDYA;CDK1;ANAPC4;CALM2;MAD1L1;ANAPC1;MAD2L1
Protein processing in endoplasmic reticulum	63/163	0.000205963	0.00328456	0	0	1.49749	12.7104	TRAM1;HSP90AB1;TUSC3;PRKCSH;UBE2D3;ERO1L;CASP12;MAN1A2;SEC61G;SEC62;SKP1A;MAP3K5;SEC63;PDIA3;HSP90AA1;FBXO2;SSR3;UBE4B;PDIA6;RAD23B;RBX1;PDIA4;DNAJC3;DDIT3;DNAJB11;CANX;PLAA;MAN1B1;ATF6;ATF4;PPP1R15A;VCP;SEC23A;HSPA4L;CUL1;DERL2;HSP90B1;UBE2J1;ATXN3;LMAN1;GANAB;HSPH1;BAG2;SSR1;SEC23B;UGGT1;EDEM3;HSPA8;HSPA5;EIF2AK2;UBE2G1;MARCH6;EIF2S1;MAPK10;DNAJA1;NSFL1C;DNAJC10;DNAJA2;STT3A;BCL2;HYOU1;CALR;MBT…
Base excision repair	19/35	0.000307733	0.00466215	0	0	2.10328	17.0077	MBD4;FEN1;PCNA;PARP4;LIG1;PARP1;PARP2;LIG3;HMGB1;UNG;POLB;POLD3;POLE4;NEIL3;TDG;POLE2;APEX1;POLE3;POLE
p53 signaling pathway	32/71	0.000338948	0.00489053	0	0	1.74624	13.9519	GORAB;EI24;PTEN;THBS1;CCNB2;CCNB1;CASP8;CCND1;CHEK2;CASP3;PERP;CHEK1;BID;GTSE1;RRM2;APAF1;GADD45B;SIVA1;GADD45A;SIAH1B;CDK6;RRM2B;CCNE2;CDK4;CDK2;BCL2;CDK1;MDM2;FAS;CYCS;ATM;ATR
Mitophagy	28/63	0.0010187	0.0140303	0	0	1.72199	11.8632	BECN1;USP15;CITED2;CALCOCO2;HIF1A;NRAS;TBK1;RHOT1;FUNDC1;E2F1;MFN1;TBC1D15;ATG5;USP8;GABARAPL2;BNIP3L;CSNK2A1;ATG9B;CSNK2A2;MAPK10;NBR1;TAX1BP1;TOMM7;PGAM5;KRAS;SQSTM1;OPTN;ATF4
Colorectal cancer	36/88	0.00138041	0.0181854	0	0	1.58501	10.4379	GSK3B;RALA;TGFA;PIK3CB;NRAS;BCL2L11;CCND1;MYC;CASP3;AKT3;MAPK1;POLK;APPL1;SMAD2;TGFB2;SMAD3;GADD45B;GADD45A;AXIN1;MLH1;RHOA;TGFBR1;MSH6;MAPK10;MSH2;PIK3CA;APC;RPS6KB1;MSH3;BCL2;BIRC5;CYCS;CTNNB1;KRAS;SOS1;SOS2
Small cell lung cancer	37/92	0.00172015	0.0217168	0	0	1.55821	9.91854	ITGB1;CDKN1B;MAX;PTEN;XIAP;LAMC2;PIK3CB;PTGS2;CKS1B;CCND1;MYC;CASP3;AKT3;E2F1;ITGAV;E2F3;POLK;IKBKG;SKP2;APAF1;CHUK;GADD45B;ITGA3;GADD45A;ITGA2;LAMB1;PTK2;CDK6;PIK3CA;CCNE2;CDK4;CDK2;CKS2;BCL2;COL4A5;CYCS;ITGA6
One carbon pool by folate	11/19	0.00299932	0.0363517	0	0	2.24311	13.0311	DHFR;ATIC;MTHFD1L;MTHFD1;SHMT2;MTHFD2;SHMT1;MTR;TYMS;ALDH1L2;GART
Non-homologous end-joining	8/13	0.00694878	0.0809801	0	0	2.38429	11.848	FEN1;XRCC6;RAD50;XRCC4;XRCC5;PRKDC;MRE11A;LIG4
Progesterone-mediated oocyte maturation	34/90	0.00817809	0.0917763	0	0	1.46369	7.03492	HSP90AB1;GNAI3;PIK3CB;ANAPC10;IGF1R;AURKA;RPS6KA3;CCNB2;RPS6KA6;CCNB1;CDC23;AKT3;CDC27;MAPK1;PRKACB;BUB1;HSP90AA1;PLK1;KIF22;CDC25C;CDC25A;MAPK13;CCNA2;MAPK10;PIK3CA;CDC16;CDK2;CDK1;SPDYA;ANAPC4;KRAS;ANAPC1;MAD1L1;MAD2L1
Proteoglycans in cancer	68/203	0.00862178	0.0933	0	0	1.29785	6.16929	ITGB1;PIK3CB;ACTG1;IGF1R;PPP1CB;PPP1CC;CCND1;CTSL;PLAU;MYC;CASP3;AKT3;ITGAV;PRKACB;PPP1R12A;ITGA2;RPS6;PLAUR;FRS2;PRKCA;RHOA;TIAM1;CTTN;PIK3CA;EZR;PPP1R12B;SOS1;TLR4;SOS2;MET;CD44;HBEGF;CD63;DDX5;CAMK2D;SDC4;ROCK1;ROCK2;SDC2;IQGAP1;HIF1A;THBS1;CDC42;NRAS;PAK1;PLCG2;DROSHA;MAPK1;FLNB;EIF4B;SMAD2;WNT10A;FZD3;TGFB2;WNT7B;FZD6;RDX;WNT7A;MSN;PTPN11;PTK2;MAPK13;RPS6KB1;MDM2;PDCD4;CTNNB1;FAS;KRAS
Herpes simplex virus 1 infection	134/433	0.0087283	0.0911957	0	0	1.19903	5.68481	ZFP568;ZFP964;ZFP566;H2-BL;ZFP961;ZFP605;ZFP119A;ZFP119B;PPP1CB;PPP1CC;TBK1;ZFP160;ZFP30;AKT3;GM10324;ZFP560;ZFP960;ZFP442;ZFP458;ZFP612;PDIA3;D3ERTD254E;ZFP334;ZFP455;ZFP459;ZFP617;ZFP40;SRSF3;ZFP7;SRSF5;ZFP9;SRSF7;ZFP623;ZFP345;ZFP748;ZFP869;ZFP868;ZFP229;ZFP867;ZFP866;ZFP61;ZFP60;ZFP58;ZFP57;ZFP52;ZFP51;ZFP54;ZFP53;ZFP184;ZFP189;ZFP101;ZFP599;EIF2B3;GM14434;EIF2AK2;2610008E11RIK;2810021J22RIK;…
Tight junction	57/167	0.0100738	0.101746	0	0	1.32242	6.08026	ITGB1;PPP2R2A;WASL;F11R;ACTG1;CCND1;PRKACB;CGNL1;MAP3K5;RAB8B;MAGI1;ACTR3;ACTR2;PRKCI;ACTN1;RHOA;RAP2C;TIAM1;CTTN;CLDN9;PARD3;CLDN7;MYH9;ARHGEF2;EZR;RAPGEF6;PRKAA1;PCNA;ROCK1;ROCK2;GATA4;CDC42;PPP2CB;PARD6B;RAP1A;MARVELD2;MARVELD3;MICALL2;MYH14;MYH10;MPDZ;HSPA4;RDX;MSN;CGN;MPP5;TJAP1;MAPK10;TJP1;OCLN;DLG1;DLG3;CDK4;NEDD4;PPP2R2D;AMOTL2;TJP2
Cellular senescence	62/185	0.0115713	0.113101	0	0	1.29847	5.79017	LIN54;H2-BL;PTEN;PIK3CB;FOXM1;PPP1CB;PPP1CC;PPP3CA;PPP3CB;CCND1;CHEK2;MYC;CHEK1;AKT3;MYBL2;NBN;HUS1;SIRT1;CDC25A;TGFBR1;CCNA2;IL1A;RBL1;CCNE2;PIK3CA;VDAC3;VDAC2;SQSTM1;PPID;GATA4;H2-Q2;LIN9;GM8909;CCNB2;CCNB1;NRAS;RBBP4;E2F1;MAPK1;TRPM7;E2F3;SMAD2;TGFB2;SMAD3;GADD45B;GADD45A;MRE11A;MAPK13;RAD50;CDK6;RHEB;CDK4;TRPV4;CDK2;MDM2;CDK1;GM11127;ATM;KRAS;RAD1;CALM2;ATR
Chronic myeloid leukemia	29/76	0.0119184	0.112852	0	0	1.47842	6.54889	HDAC2;CDKN1B;HDAC1;PIK3CB;NRAS;MECOM;CCND1;MYC;AKT3;E2F1;MAPK1;E2F3;POLK;IKBKG;TGFB2;SMAD3;CHUK;GADD45B;GADD45A;PTPN11;TGFBR1;CDK6;PIK3CA;CDK4;MDM2;KRAS;SOS1;SOS2;CRK
Aminoacyl-tRNA biosynthesis	25/66	0.0205563	0.188744	0	0	1.4676	5.70103	CARS;TARSL2;TARS;EPRS;NARS;LARS;RARS;NARS2;HARS;YARS;DARS;WARS;GATC;SARS;DARS2;WARS2;LARS2;KARS;MARS;GARS;TARS2;IARS;FARSA;AARS;FARSB
Pyrimidine metabolism	22/58	0.0281782	0.251118	0	0	1.46963	5.2454	DTYMK;DUT;RRM1;RRM2;NME2;NUDT2;CTPS;TYMS;NT5C2;DCK;NT5C3;NME1;DCTD;NT5E;UCK2;NME6;RRM2B;NME7;UPRT;TK1;UMPS;DCTPP1
Adherens junction	26/72	0.0341748	0.295856	0	0	1.39911	4.72378	CTNND1;WASL;IQGAP1;ACTG1;IGF1R;CDC42;CDH1;CTNNA1;MAPK1;WASF1;ACP1;SMAD2;YES1;SMAD3;CSNK2A1;ACTN1;CSNK2A2;LMO7;RHOA;TGFBR1;TJP1;FER;PARD3;CTNNB1;MET;SSX2IP
Ferroptosis	16/40	0.0346172	0.291361	0	0	1.54979	5.21256	PRNP;TFRC;GPX4;NCOA4;ACSL5;SLC3A2;ACSL4;SLC7A11;ACSL3;SAT1;SLC39A14;CP;PCBP2;VDAC3;VDAC2;ATG5
Hedgehog signaling pathway	17/44	0.0419958	0.343912	0	0	1.49695	4.74562	GSK3B;CSNK1G3;SMURF2;CSNK1A1;HHIP;CUL3;CUL1;CSNK1D;KIF7;GLI3;CCND1;KIF3A;GPR161;BCL2;SPOPL;PRKACB;CSNK1G1
Endometrial cancer	21/58	0.0517908	0.412963	0	0	1.40282	4.15312	GSK3B;GADD45B;GADD45A;PTEN;AXIN1;PIK3CB;MLH1;NRAS;CCND1;PIK3CA;APC;CDH1;MYC;AKT3;CTNNA1;MAPK1;CTNNB1;KRAS;POLK;SOS1;SOS2
Pancreatic cancer	26/75	0.0553202	0.429796	0	0	1.34315	3.8879	RALA;TGFA;PIK3CB;BRCA2;CDC42;CCND1;AKT3;E2F1;MAPK1;E2F3;POLK;IKBKG;SMAD2;TGFB2;SMAD3;CHUK;GADD45B;GADD45A;TGFBR1;MAPK10;CDK6;RAD51;PIK3CA;RPS6KB1;CDK4;KRAS
TNF signaling pathway	36/110	0.0627333	0.475205	0	0	1.26801	3.51094	ATF2;CSF2;CSF1;TNFAIP3;CXCL1;PIK3CB;CXCL3;PTGS2;RPS6KA5;CASP8;CASP3;AKT3;MAPK1;RIPK1;IKBKG;DNM1L;MAP3K5;MAP2K4;EDN1;VCAM1;JAG1;MLKL;CHUK;CCL20;LIF;IFI47;MAPK13;MAPK10;ITCH;CREB1;PIK3CA;TAB3;FAS;TAB2;PGAM5;ATF4
Thyroid cancer	14/37	0.0724987	0.535783	0	0	1.46601	3.8471	GADD45B;TPM3;GADD45A;NCOA4;NRAS;CCND1;PAX8;CDH1;MYC;TPR;MAPK1;CTNNB1;KRAS;POLK
Hippo signaling pathway	49/159	0.0889745	0.641887	0	0	1.19402	2.88881	YWHAE;GSK3B;BMPR2;YWHAB;WWC1;PPP2R2A;ACTG1;PPP1CB;PPP1CC;RASSF1;CCND1;YWHAQ;CDH1;MYC;RASSF6;TEAD1;YWHAH;TEAD4;PRKCI;AXIN1;CSNK1D;YWHAZ;TGFBR1;LATS1;PARD3;BIRC5;YAP1;STK3;PPP2CB;PARD6B;PAK1;DVL2;CTNNA1;TRP53BP2;SMAD2;TGFB2;WNT10A;FZD3;SMAD3;WNT7B;FZD6;WNT7A;MPP5;DLG1;DLG3;APC;PPP2R2D;CTNNB1;BMPR1A
Prostate cancer	31/97	0.103586	0.729917	0	0	1.23823	2.80751	GSK3B;CDKN1B;HSP90AB1;PTEN;TGFA;PIK3CB;IGF1R;HSP90B1;NRAS;CCND1;PLAU;AKT3;PDGFC;E2F1;MAPK1;E2F3;IKBKG;HSP90AA1;CHUK;CREB1;SPINT1;CCNE2;PIK3CA;CDK2;MDM2;BCL2;CTNNB1;KRAS;SOS1;SOS2;ATF4
ErbB signaling pathway	27/84	0.115669	0.796537	0	0	1.24536	2.68628	GSK3B;CAMK2D;CDKN1B;TGFA;PIK3CB;NRAS;PAK1;MYC;AKT3;PLCG2;ABL2;MAPK1;PAK3;PAK2;NCK1;MAP2K4;NRG1;PRKCA;PTK2;MAPK10;PIK3CA;RPS6KB1;KRAS;SOS1;SOS2;CRK;HBEGF
Hepatitis B	49/163	0.124756	0.840025	0	0	1.16472	2.42424	ATF2;DDX3X;YWHAB;PIK3CB;TBK1;CASP8;CASP12;YWHAQ;MYC;CASP3;AKT3;IKBKG;JAK2;MAP2K4;APAF1;CHUK;PRKCA;YWHAZ;TIRAP;TGFBR1;CCNA2;DDB1;CREB1;CCNE2;PIK3CA;VDAC3;BIRC5;SOS1;SOS2;TLR4;TLR3;ATF4;PCNA;NRAS;E2F1;MAPK1;E2F3;BID;SMAD2;TGFB2;SMAD3;MAPK13;MAPK10;CDK2;BCL2;CYCS;FAS;TAB2;KRAS
Renal cell carcinoma	22/68	0.137176	0.903571	0	0	1.2535	2.49008	TGFB2;CUL2;TGFA;PTPN11;PIK3CB;HIF1A;RBX1;RAP1B;CDC42;NRAS;PAK1;RAP1A;PIK3CA;AKT3;MAPK1;KRAS;SOS1;PAK3;SOS2;MET;CRK;PAK2
Glioma	24/75	0.137391	0.885734	0	0	1.23983	2.46097	CAMK2D;GADD45B;GADD45A;PTEN;TGFA;PRKCA;PIK3CB;IGF1R;NRAS;CDK6;CCND1;PIK3CA;CDK4;AKT3;E2F1;PLCG2;MDM2;MAPK1;E2F3;KRAS;POLK;SOS1;SOS2;CALM2
mTOR signaling pathway	46/154	0.144114	0.909722	0	0	1.15731	2.24188	ATP6V1A;GSK3B;PRKAA1;SEH1L;MAPKAP1;PTEN;SLC3A2;PIK3CB;IGF1R;RPS6KA3;RPS6KA6;NRAS;AKT3;DVL2;ATP6V1H;MAPK1;RICTOR;SKP2;FNIP1;ATP6V1D;FNIP2;EIF4E;ATP6V1C1;EIF4B;ATP6V1G1;WNT10A;FZD3;MIOS;CHUK;WNT7B;RPS6;FZD6;WNT7A;PRKCA;RHOA;SLC7A5;RRAGA;CLIP1;RRAGC;PIK3CA;RPS6KB1;RHEB;KRAS;EIF4E2;SOS1;SOS2
Bladder cancer	14/41	0.148808	0.920181	0	0	1.32299	2.52042	THBS1;NRAS;RASSF1;RPS6KA5;CCND1;CDH1;CDK4;MYC;E2F1;MDM2;MAPK1;E2F3;KRAS;HBEGF
Non-small cell lung cancer	21/66	0.164006	0.993877	0	0	1.23279	2.22869	GADD45B;GADD45A;TGFA;PRKCA;PIK3CB;EML4;RASSF1;NRAS;CDK6;CCND1;PIK3CA;CDK4;AKT3;E2F1;PLCG2;MAPK1;E2F3;KRAS;POLK;SOS1;SOS2
IL-17 signaling pathway	28/91	0.167189	0.993301	0	0	1.19214	2.1323	GSK3B;CSF3;CSF2;HSP90AB1;SRSF1;TNFAIP3;CXCL1;CXCL3;PTGS2;ELAVL1;CXCL5;HSP90B1;CASP8;TBK1;CASP3;MAPK1;IKBKG;MAPK6;USP25;HSP90AA1;CHUK;CCL20;MAPK13;MAPK10;FOSL1;FOSB;TAB3;TAB2
Amino sugar and nucleotide sugar metabolism	16/49	0.174476	1	0	0	1.26513	2.20888	CMAS;UXS1;GFPT1;UAP1;CMAH;NANP;UGDH;CYB5R1;CYB5R4;UGP2;GMDS;GNPDA2;PGM3;GNPNAT1;NANS;PGM1
FoxO signaling pathway	39/132	0.187317	1	0	0	1.14473	1.91737	PRKAA1;CDKN1B;SETD7;PTEN;PIK3CB;IGF1R;CCNB2;CCNB1;NRAS;BCL2L11;CCND1;AKT3;MAPK1;SKP2;PLK4;SMAD2;GABARAPL2;USP7;TGFB2;SMAD3;HOMER1;GADD45B;CHUK;GADD45A;PRMT1;PLK2;PLK1;SIRT1;TGFBR1;MAPK13;MAPK10;PIK3CA;CDK2;MDM2;ATM;SGK3;KRAS;SOS1;SOS2
Salmonella infection	24/78	0.189874	1	0	0	1.19214	1.98062	DYNC2H1;DYNC1I2;CSF2;ROCK1;ROCK2;CXCL1;WASL;CXCL3;KLC1;ACTG1;MAPK13;CDC42;MAPK10;TJP1;IL1A;DYNC1LI1;DYNC1LI2;ARPC3;CASP1;MAPK1;FLNB;PKN2;WASF1;TLR4
Epstein-Barr virus infection	65/229	0.205147	1	0	0	1.09974	1.74202	H2-BL;CDKN1B;TNFAIP3;PIK3CB;RBPJ;PSMD6;PSMD7;TBK1;CASP8;CCND1;MYC;PSMD2;CASP3;AKT3;PSMD1;CIR1;IKBKG;POLK;SKP2;PDIA3;MAP2K4;USP7;APAF1;CHUK;SAP30;CCNA2;CCNE2;PIK3CA;CD44;PSMD12;HDAC2;PSMD11;PSMD14;HDAC1;H2-Q2;GM8909;BCL2L11;PLCG2;E2F1;RIPK1;E2F3;BID;GADD45B;GADD45A;EIF2AK2;ISG15;MAPK13;MAPK10;PSMC5;SNW1;PSMC6;CDK6;PSMC3;CDK4;PSMC1;NEDD4;PSMC2;CDK2;MDM2;BCL2;GM11127;FAS;CYCS;TAB2;CALR
Hepatocellular carcinoma	49/171	0.220121	1	0	0	1.11023	1.68041	GSK3B;PTEN;PIK3CB;ACTG1;IGF1R;CCND1;MYC;AKT3;DPF1;POLK;SMARCC1;PBRM1;GSTO1;ACTL6A;AXIN1;PRKCA;TGFBR1;PIK3CA;SOS1;SOS2;MET;TGFA;NRAS;PLCG2;DVL2;E2F1;MAPK1;E2F3;BRD7;SMAD2;SMARCE1;TGFB2;WNT10A;FZD3;SMAD3;GADD45B;PHF10;GADD45A;CSNK1A1;TXNRD1;WNT7B;FZD6;WNT7A;CDK6;APC;RPS6KB1;CDK4;CTNNB1;KRAS
TGF-beta signaling pathway	27/91	0.231954	1	0	0	1.14957	1.67977	BMPR2;ROCK1;ZFYVE9;CUL1;THBS1;LTBP1;PPP2CB;MYC;MAPK1;SKP1A;NEO1;ACVR1;TGIF1;SMAD2;TGFB2;SMAD3;SMURF2;INHBA;RHOA;TGFBR1;ACVR2A;RBX1;RBL1;ZFYVE16;TFDP1;RPS6KB1;BMPR1A
Bacterial invasion of epithelial cells	22/74	0.257444	1	0	0	1.15187	1.56303	ITGB1;SEPT11;CLTC;PIK3CB;WASL;RHOA;SEPT2;PTK2;ACTG1;CD2AP;SEPT8;CDC42;ARHGAP10;PIK3CA;CTTN;CDH1;ARPC3;CTNNA1;CTNNB1;WASF1;MET;CRK
Selenocompound metabolism	6/17	0.259948	1	0	0	1.36746	1.84234	TXNRD1;CTH;MARS;MTR;SEPHS1;PAPSS1
Signaling pathways regulating pluripotency of stem cells	39/137	0.266071	1	0	0	1.10295	1.4603	GSK3B;BMPR2;RIF1;PIK3CB;BMI1;IGF1R;NRAS;MYC;AKT3;DVL2;SMARCAD1;MAPK1;OTX1;JAK2;SKIL;ACVR1;SMAD2;WNT10A;FZD3;PCGF6;SMAD3;SETDB1;PCGF5;WNT7B;FZD6;PCGF3;LIF;AXIN1;WNT7A;PAX6;INHBA;DUSP9;ACVR2A;MAPK13;PIK3CA;APC;CTNNB1;KRAS;BMPR1A
Melanoma	21/72	0.297145	1	0	0	1.13005	1.37136	GADD45B;GADD45A;PTEN;PIK3CB;IGF1R;FGF17;NRAS;CDK6;CCND1;PIK3CA;CDH1;CDK4;AKT3;PDGFC;E2F1;MDM2;MAPK1;E2F3;KRAS;POLK;MET
Viral carcinogenesis	63/229	0.300026	1	0	0	1.0659	1.28322	YWHAE;ATF2;H2-BL;CDKN1B;DDX3X;YWHAB;GTF2B;CHD4;PIK3CB;RBPJ;CDC20;POLB;CASP8;CCND1;YWHAQ;CASP3;CHEK1;IKBKG;SKP2;PRKACB;YWHAH;USP7;TBP;ACTN1;YWHAZ;RHOA;DDB1;CCNA2;CREB1;RBL1;CCNE2;PIK3CA;RASA2;VDAC3;TBPL1;MAD1L1;ATF4;GTF2A2;HDAC2;HDAC1;H2-Q2;GTF2E1;GTF2E2;GM8909;CDC42;NRAS;MAPK1;RANBP1;EIF2AK2;GTF2H1;GTF2H2;DLG1;HNRNPK;SNW1;CDK6;CDK4;PSMC1;DNAJA3;CDK2;MDM2;CDK1;GM11127;KRAS
VEGF signaling pathway	17/58	0.31618	1	0	0	1.13562	1.3076	SPHK1;PLA2G4C;PLA2G4A;PRKCA;PIK3CB;PTGS2;PTK2;MAPK13;CDC42;PPP3CA;PPP3CB;NRAS;PIK3CA;AKT3;PLCG2;MAPK1;KRAS
Endocytosis	73/269	0.330086	1	0	0	1.05144	1.16541	VPS29;H2-BL;TFRC;ZFYVE9;CLTC;SNX12;WASL;RAB22A;IGF1R;EEA1;CHMP1B;KIF5B;VPS35;VPS36;SH3GLB1;USP8;PRKCI;ARAP2;VPS37A;RHOA;TGFBR1;ACAP2;ZFYVE16;RAB31;RABEP1;PARD3;CHMP4C;STAM2;CHMP5;TSG101;VPS4B;VPS26A;ASAP1;H2-Q2;ASAP2;GM8909;CDC42;SNX4;CYTH2;SNX1;PARD6B;RAB11FIP1;SNX2;PIP5K1A;RAB11FIP2;EPS15;SNX5;SNX6;SMAD2;ARFGEF1;HSPA8;SMAD3;SMURF2;STAM;SNF8;AP2B1;RAB11A;IGF2R;RAB10;ITCH;2610002M06RIK;ARPC3;NEDD…
Apoptosis	39/141	0.337342	1	0	0	1.07166	1.16453	BECN1;HTRA2;XIAP;PIK3CB;ACTG1;LMNB1;NRAS;BCL2L11;CASP8;CASP12;AIFM1;CTSL;CASP3;AKT3;MAPK1;RIPK1;IKBKG;BID;MAP3K5;BOK;PARP4;GADD45B;APAF1;CHUK;PARP1;GADD45A;PARP2;TNFRSF10B;EIF2S1;MAPK10;PIK3CA;DDIT3;BCL2;CYCS;BIRC5;FAS;ATM;KRAS;ATF4
SNARE interactions in vesicular transport	10/33	0.338059	1	0	0	1.17408	1.27333	VAMP7;STX17;STX8;STX7;BNIP1;STX3;SEC22B;VAMP4;SNAP29;BET1
Gastric cancer	41/150	0.364154	1	0	0	1.05902	1.0698	GSK3B;CDKN1B;PIK3CB;NRAS;CCND1;CDH1;MYC;AKT3;DVL2;E2F1;CTNNA1;MAPK1;E2F3;POLK;ABCB1B;SMAD2;TGFB2;WNT10A;FZD3;SMAD3;GADD45B;GADD45A;CSNK1A1;WNT7B;FZD6;AXIN1;WNT7A;MLH1;TGFBR1;FGF17;CCNE2;PIK3CA;APC;RPS6KB1;CDK2;BCL2;CTNNB1;KRAS;SOS1;SOS2;MET
Human T-cell leukemia virus 1 infection	66/245	0.365806	1	0	0	1.04373	1.04963	ATF2;H2-BL;CSF2;PTEN;BUB1B;PIK3CB;CDC20;POLB;PPP3CA;PPP3CB;CDC23;XPO1;CCND1;PTTG1;CHEK2;MYC;CHEK1;AKT3;CDC27;IKBKG;PRKACB;MAP2K4;TBP;CHUK;MSX3;TGFBR1;CCNA2;CREB1;CCNE2;PIK3CA;ESPL1;CANX;VDAC3;TBPL1;VDAC2;ANAPC4;MAD1L1;ANAPC1;ATF4;XIAP;H2-Q2;ANAPC10;GM8909;CCNB2;NRAS;E2F1;MAPK1;E2F3;SMAD2;RANBP1;TGFB2;SMAD3;NFYB;FOSL1;MAPK10;DLG1;CDK4;CDC16;CDK2;GM11127;ATM;KRAS;CALR;RAN;ATR;MAD2L1
Neurotrophin signaling pathway	33/121	0.389771	1	0	0	1.05667	0.995592	YWHAE;GSK3B;CAMK2D;PRDM4;ARHGDIG;PSEN1;PIK3CB;RAP1B;CDC42;RPS6KA3;RPS6KA6;NRAS;RPS6KA5;RAP1A;AKT3;PLCG2;MAPK1;MAP3K5;BDNF;FRS2;PTPN11;RHOA;MAPK13;MAPK10;PIK3CA;BCL2;KRAS;SOS1;CALM2;SOS2;CRK;ATF4;ZFP110
Autophagy	35/130	0.418487	1	0	0	1.04313	0.908676	BECN1;PRKAA1;STX17;PTEN;PIK3CB;HMGB1;HIF1A;IGF1R;PPP2CB;NRAS;CTSL;RB1CC1;LAMP2;AKT3;MAPK1;NRBF2;PRKACB;SNAP29;ATG5;SH3GLB1;IGBP1;GABARAPL2;ATG9B;EIF2S1;MAPK10;RRAGA;RRAGC;PIK3CA;RPS6KB1;RHEB;BCL2;ATG4C;PIK3C3;KRAS;ATG2B
Vasopressin-regulated water reabsorption	12/43	0.43345	1	0	0	1.08125	0.903899	DCTN6;DYNC2LI1;DYNC2H1;DYNC1I2;DYNC1LI1;DYNC1LI2;CREB1;ARHGDIG;DYNLL1;PRKACB;RAB5A;RAB11A
Fluid shear stress and atherosclerosis	38/143	0.448874	1	0	0	1.02958	0.824705	TXN1;PRKAA1;BMPR2;HSP90AB1;SDC4;SDC2;PIK3CB;ACTG1;HSP90B1;SUMO1;CTSL;SUMO3;AKT3;SUMO2;ITGAV;IKBKG;MAP3K5;ACVR1;MAP2K4;EDN1;HSP90AA1;VCAM1;CHUK;GSTO1;PTK2;RHOA;ACVR2A;MAPK13;MAPK10;IL1A;PIK3CA;TRPV4;BCL2;CTNNB1;ARHGEF2;SQSTM1;CALM2;BMPR1A
AGE-RAGE signaling pathway in diabetic complications	27/101	0.453638	1	0	0	1.03575	0.818714	CDKN1B;PIK3CB;CDC42;NRAS;CCND1;CASP3;AKT3;PLCG2;MAPK1;JAK2;SMAD2;TGFB2;EDN1;VCAM1;SMAD3;VEGFC;PRKCA;TGFBR1;MAPK13;MAPK10;IL1A;PLCB4;PIK3CA;CDK4;BCL2;COL4A5;KRAS
Long-term potentiation	18/67	0.467962	1	0	0	1.0409	0.790427	CAMK2D;PRKCA;PPP1CB;RAP1B;PPP3CA;PPP1CC;RPS6KA3;PPP3CB;RPS6KA6;NRAS;PLCB4;RAP1A;GNAQ;MAPK1;KRAS;PRKACB;CALM2;ATF4
Hepatitis C	42/160	0.4795	1	0	0	1.01705	0.747542	YWHAE;GSK3B;YWHAB;PPP2R2A;PIK3CB;PPP2CB;NRAS;TBK1;CASP8;CCND1;YWHAQ;MYC;CASP3;AKT3;E2F1;MAPK1;RIPK1;E2F3;IKBKG;BID;YWHAH;APAF1;CHUK;EIF2AK2;EIF2S1;YWHAZ;OCLN;CDK6;PIK3CA;CLDN9;CDK4;CLDN7;CDK2;PPP2R2D;CYCS;FAS;CTNNB1;KRAS;EIF3E;SOS1;SOS2;TLR3
Phosphonate and phosphinate metabolism	2/6	0.485194	1	0	0	1.29149	0.934013	PCYT1B;CEPT1
Axon guidance	47/180	0.49171	1	0	0	1.01167	0.718147	ITGB1;GSK3B;CAMK2D;BMPR2;ROCK1;ROCK2;GNAI3;SEMA3E;PIK3CB;EFNA5;RND1;EFNB2;CDC42;PPP3CA;PPP3CB;NRAS;PARD6B;PAK1;CFL2;PLCG2;MAPK1;SRGAP3;SRGAP2;PAK3;NEO1;PAK2;NCK1;FZD3;EPHA8;UNC5B;RYK;TRPC1;PRKCA;PTPN11;RHOD;PTK2;RHOA;EFNA1;ENAH;PIK3CA;PARD3;RASA1;PLXNB1;KRAS;EPHA1;MET;EPHA2
Human papillomavirus infection	93/360	0.516391	1	0	0	1.0009	0.661488	ITGB1;GSK3B;H2-BL;CDKN1B;PTEN;PPP2R2A;LAMC2;CHD4;PIK3CB;RBPJ;TBK1;CASP8;CCND1;PPP2R5E;CASP3;AKT3;ITGAV;IKBKG;PRKACB;OASL2;MAGI1;PRKCI;ATP6V1G1;TBP;CHUK;ITGA3;ITGA2;AXIN1;PPP2R5C;TUBG1;CCNA2;COL2A1;CREB1;RBL1;CCNE2;PIK3CA;NFX1;PARD3;TBPL1;COL4A5;ITGA6;SOS1;SOS2;TLR3;ATP6V1A;HDAC2;HDAC1;H2-Q2;PSEN1;PTGS2;THBS1;GM8909;CDC42;PPP2CB;NRAS;PARD6B;PPP2R3C;SPP1;DVL2;E2F1;ATP6V1H;MAPK1;ATP6V1D;ATP6V1C1;WNT…
Cytosolic DNA-sensing pathway	16/61	0.51906	1	0	0	1.01625	0.666395	CHUK;IFI202B;TBK1;POLR3A;POLR3B;POLR3D;POLR1C;CASP1;POLR1D;POLR3F;POLR2F;POLR3G;RIPK1;IKBKG;POLR2H;POLR3K
Purine metabolism	35/136	0.540897	1	0	0	0.997106	0.612747	PRPS2;PRPS1;GMPS;ADK;NUDT2;AK4;NUDT5;NT5C2;PFAS;NT5C3;PAPSS1;NT5E;ATIC;PPAT;PDE6D;ENPP4;ADSS;PGM1;PRPS1L3;RRM1;RRM2;NME2;HPRT;PAICS;DCK;NME1;APRT;NME6;RRM2B;NME7;IMPDH2;PDE7A;GART;ITPA;ADA
N-Glycan biosynthesis	13/50	0.541776	1	0	0	1.00736	0.617414	ALG6;TUSC3;ALG5;ALG11;FUT8;GANAB;MAN1A2;MAN2A1;MGAT4B;STT3A;MAN1B1;MGAT2;ALG10B
Legionellosis	15/58	0.54658	1	0	0	1.00202	0.605293	HBS1L;HSPA8;VCP;APAF1;CXCL1;CXCL3;HSPD1;EEF1A1;EEF1G;CASP8;CASP3;CASP1;CYCS;SEC22B;TLR4
Steroid biosynthesis	5/19	0.567033	1	0	0	1.0196	0.578455	SQLE;CYP27B1;CYP24A1;SOAT1;SOAT2
Terpenoid backbone biosynthesis	6/23	0.567188	1	0	0	1.01073	0.573149	NUS1;GGPS1;FNTA;PDSS1;HMGCR;ZMPSTE24
Basal cell carcinoma	16/63	0.577941	1	0	0	0.983992	0.539506	GSK3B;WNT10A;FZD3;GADD45B;GADD45A;HHIP;WNT7B;FZD6;AXIN1;WNT7A;KIF7;GLI3;APC;DVL2;CTNNB1;POLK
Leukocyte transendothelial migration	29/115	0.593369	1	0	0	0.97704	0.509954	ITGB1;ROCK1;ROCK2;CTNND1;GNAI3;PIK3CB;F11R;ARHGAP5;ACTG1;RAP1B;CDC42;RAP1A;PLCG2;CTNNA1;VAV3;VCAM1;ACTN1;MSN;PRKCA;PTPN11;PTK2;RHOA;MAPK13;OCLN;PIK3CA;CLDN9;CLDN7;CTNNB1;EZR
Amyotrophic lateral sclerosis (ALS)	13/52	0.605696	1	0	0	0.968617	0.485642	APAF1;MAPK13;PPP3CA;PPP3CB;CASP12;ALS2;CASP3;CASP1;BCL2;CYCS;BID;RAB5A;MAP3K5
Fc epsilon RI signaling pathway	17/68	0.606687	1	0	0	0.968617	0.484059	VAV3;MAP2K4;CSF2;PLA2G4C;PLA2G4A;PRKCA;PIK3CB;MAPK13;MAPK10;NRAS;PIK3CA;AKT3;PLCG2;MAPK1;KRAS;SOS1;SOS2
Human immunodeficiency virus 1 infection	60/238	0.608862	1	0	0	0.976756	0.48463	H2-BL;PIK3CB;PPP3CA;PPP3CB;TBK1;CASP8;CFL2;CASP3;CHEK1;AKT3;AP1S2;AP1S1;AP1S3;IKBKG;SKP1A;PDIA3;CHUK;PRKCA;CDC25C;RBX1;DDB1;PIK3CA;TLR4;CRK;CUL5;GNAI3;CUL1;H2-Q2;RNF7;GM8909;CCNB2;GNG10;NRAS;PAK1;CCNB1;PLCG2;MAPK1;RIPK1;BID;PAK3;PAK2;PTK2;MAPK13;MAPK10;CUL4A;WEE1;RPS6KB1;GNAQ;BCL2;CDK1;GM11127;FAS;CYCS;ATM;TAB2;KRAS;CALR;CALM2;ATR;CUL4B
Focal adhesion	50/199	0.614568	1	0	0	0.973484	0.473926	ITGB1;GSK3B;PTEN;LAMC2;PIK3CB;ARHGAP5;ACTG1;IGF1R;PPP1CB;PPP1CC;CCND1;AKT3;ITGAV;VAV3;PPP1R12A;ITGA3;ACTN1;ITGA2;PRKCA;RHOA;COL2A1;PIK3CA;COL4A5;ITGA6;PPP1R12B;SOS1;SOS2;MET;CRK;ROCK1;ROCK2;XIAP;THBS1;RAP1B;CDC42;PAK1;RAP1A;PDGFC;SPP1;MAPK1;FLNB;PAK3;PAK2;VEGFC;PARVA;LAMB1;PTK2;MAPK10;BCL2;CTNNB1
Sphingolipid signaling pathway	31/124	0.615823	1	0	0	0.968617	0.469581	ASAH1;ROCK1;ROCK2;PTEN;GNAI3;PPP2R2A;PIK3CB;SGMS2;PPP2CB;NRAS;SPTLC2;PPP2R5E;PPP2R3C;AKT3;BDKRB2;MAPK1;BID;MAP3K5;SPHK1;PRKCA;PPP2R5C;RHOA;MAPK13;MAPK10;PLCB4;PIK3CA;GNAQ;PPP2R2D;BCL2;DEGS1;KRAS
Wnt signaling pathway	40/160	0.622725	1	0	0	0.968617	0.458785	INVS;GSK3B;CAMK2D;ROCK2;CUL1;PSEN1;PPP3CA;PPP3CB;ZNRF3;CCND1;MYC;RUVBL1;DVL2;TBL1X;SKP1A;PRKACB;WNT10A;FZD3;SMAD3;CSNK2A1;RYK;CSNK1A1;WNT7B;CSNK2A2;FZD6;AXIN1;WNT7A;PRKCA;CACYBP;SIAH1B;SENP2;RHOA;RBX1;FOSL1;MAPK10;PLCB4;DAAM1;APC;TBL1XR1;CTNNB1
Necroptosis	44/176	0.625796	1	0	0	0.968617	0.454021	CAMK2D;HSP90AB1;FAF1;VPS4B;TNFAIP3;XIAP;HMGB1;CASP8;AIFM1;CHMP1B;CASP1;TRPM7;RIPK1;DNM1L;JAK2;BID;HSP90AA1;PARP4;MLKL;PARP1;H2AFZ;PARP2;PLA2G4C;TNFRSF10B;EIF2AK2;PLA2G4A;MAPK10;CYLD;IL1A;2610002M06RIK;CHMP2B;CHMP4C;VDAC3;CHMP2A;BCL2;VDAC2;FAS;PGAM5;PPIA;SQSTM1;TLR4;PPID;TLR3;CHMP5
Inositol phosphate metabolism	18/73	0.633092	1	0	0	0.955348	0.436728	PI4K2B;MTMR2;SACM1L;PTEN;OCRL;PIK3CB;SYNJ2;PIK3C2A;MTM1;FIG4;PLCB4;IMPA1;PIK3CA;INPP5F;IMPAD1;PLCG2;PIP5K1A;PIK3C3
Thyroid hormone synthesis	18/73	0.633092	1	0	0	0.955348	0.436728	ATF2;HSPA5;GSR;GPX8;PRKCA;TTF2;ATP1A1;TTF1;PDIA4;HSP90B1;CREB1;PLCB4;PAX8;GNAQ;CANX;PRKACB;TSHB;ATF4
T cell receptor signaling pathway	25/101	0.6335	1	0	0	0.959027	0.437792	GSK3B;CSF2;BCL10;PIK3CB;CDC42;PPP3CA;PPP3CB;NRAS;PAK1;AKT3;MAPK1;IKBKG;PAK3;PAK2;NCK1;VAV3;CHUK;RHOA;MAPK13;DLG1;PIK3CA;CDK4;KRAS;SOS1;SOS2
Glycosylphosphatidylinositol (GPI)-anchor biosynthesis	6/25	0.656586	1	0	0	0.929872	0.391199	PIGN;PIGA;PIGK;PIGW;PIGG;PIGF
Breast cancer	36/147	0.673491	1	0	0	0.948849	0.375062	GSK3B;PTEN;PIK3CB;BRCA1;BRCA2;IGF1R;NRAS;CCND1;MYC;AKT3;DVL2;E2F1;MAPK1;E2F3;POLK;WNT10A;FZD3;JAG1;GADD45B;GADD45A;CSNK1A1;WNT7B;FZD6;AXIN1;WNT7A;ESR2;FGF17;CDK6;PIK3CA;APC;RPS6KB1;CDK4;CTNNB1;KRAS;SOS1;SOS2
Thyroid hormone signaling pathway	28/115	0.674528	1	0	0	0.943349	0.371436	GSK3B;HDAC2;HDAC1;ATP2A2;GATA4;PIK3CB;ATP1A1;HIF1A;ACTG1;MED17;NRAS;MED13;CCND1;MYC;AKT3;PLCG2;MAPK1;ITGAV;PRKACB;MED1;PRKCA;MED4;PLCB4;PIK3CA;RHEB;MDM2;CTNNB1;KRAS
Nitrogen metabolism	4/17	0.67507	1	0	0	0.911639	0.358219	CAR13;CAR9;CAR12;CAR6
Fc gamma R-mediated phagocytosis	21/87	0.678765	1	0	0	0.935216	0.362378	VAV3;MARCKSL1;SPHK1;PLA2G4A;PRKCA;ASAP1;PIK3CB;WASL;ASAP2;CDC42;PAK1;PIK3CA;RPS6KB1;ARPC3;CFL2;AKT3;PLCG2;PIP5K1A;MAPK1;WASF1;CRK
Regulation of actin cytoskeleton	53/217	0.704814	1	0	0	0.946298	0.331035	ITGB1;CYFIP1;NCKAP1;WASL;PIK3CB;ACTG1;PPP1CB;PPP1CC;CFL2;BDKRB2;ITGAV;VAV3;PPP1R12A;ITGA3;ACTN1;ITGA2;F2R;RHOA;ENAH;TIAM1;PIK3CA;MYH9;ITGA6;EZR;PPP1R12B;SOS1;SOS2;CRK;ROCK1;ROCK2;IQGAP1;IQGAP3;FGD1;FGD3;CDC42;NRAS;PAK1;PDGFC;PIP5K1A;MYH14;MAPK1;PAK3;WASF1;PAK2;MYH10;RDX;MSN;PTK2;FGF17;ABI2;APC;ARPC3;KRAS
Amphetamine addiction	16/68	0.710038	1	0	0	0.911639	0.312178	ATF2;CAMK2D;MAOA;HDAC1;PRKCA;SIRT1;PPP1CB;PPP3CA;PPP1CC;PPP3CB;CREB1;FOSB;PRKACB;CALM2;SLC18A2;ATF4
Sulfur metabolism	2/9	0.718763	1	0	0	0.860993	0.28432	IMPAD1;PAPSS1
Vitamin B6 metabolism	2/9	0.718763	1	0	0	0.860993	0.28432	PHOSPHO2;PSAT1
Glycine, serine and threonine metabolism	9/40	0.739566	1	0	0	0.871755	0.263001	GCSH;MAOA;SHMT2;PSAT1;SHMT1;CTH;PHGDH;DLD;PSPH
Fatty acid biosynthesis	3/14	0.74168	1	0	0	0.830243	0.248107	ACSL5;ACSL4;ACSL3
Chagas disease (American trypanosomiasis)	24/103	0.753845	1	0	0	0.902788	0.2551	SMAD2;MAP2K4;TGFB2;SMAD3;CHUK;GNAI3;PPP2R2A;PIK3CB;TGFBR1;MAPK13;MAPK10;PPP2CB;CASP8;PLCB4;PIK3CA;GNAQ;AKT3;PPP2R2D;BDKRB2;MAPK1;FAS;CALR;IKBKG;TLR4
Pentose phosphate pathway	7/32	0.756047	1	0	0	0.84754	0.237016	PRPS2;RPIA;PRPS1;RPE;RGN;PGM1;PRPS1L3
Arginine biosynthesis	4/19	0.7624	1	0	0	0.815677	0.22128	ACY1;GLS2;GOT2;GLS
Alanine, aspartate and glutamate metabolism	8/37	0.775628	1	0	0	0.837723	0.21285	GLS2;PPAT;GFPT1;GOT2;ASNS;ADSS;NIT2;GLS
Thiamine metabolism	3/15	0.785196	1	0	0	0.774893	0.187386	THTPA;AK4;ACP1
Lysine degradation	13/59	0.789392	1	0	0	0.853696	0.201892	SUV39H2;SETD2;SETD3;SETDB1;SUV39H1;SETD7;SETD1A;SETDB2;PRDM2;PLOD2;ASH1L;DLD;EZH2
B cell receptor signaling pathway	16/72	0.795314	1	0	0	0.860993	0.197183	VAV3;GSK3B;CHUK;PIK3CB;BCL10;PPP3CA;PPP3CB;NRAS;PIK3CA;AKT3;PLCG2;MAPK1;KRAS;IKBKG;SOS1;SOS2
Prolactin signaling pathway	16/72	0.795314	1	0	0	0.860993	0.197183	GSK3B;PIK3CB;ESR2;MAPK13;MAPK10;NRAS;CCND1;PIK3CA;AKT3;MAPK1;KRAS;JAK2;SOS1;SOCS6;SOS2;SOCS4
Glutathione metabolism	14/64	0.80446	1	0	0	0.84754	0.184411	RRM1;RRM2;GPX4;GSTO1;ODC1;GSR;GPX8;TXNDC12;GGCT;RRM2B;SMS;CHAC2;CHAC1;LAP3
NF-kappa B signaling pathway	23/102	0.806064	1	0	0	0.873654	0.188352	CARD10;UBE2I;VCAM1;CSNK2A1;GADD45B;CHUK;PARP1;CSNK2A2;TNFAIP3;XIAP;BCL10;PTGS2;TIRAP;PLAU;PLCG2;BCL2;TRIM25;TAB3;RIPK1;TAB2;ATM;IKBKG;TLR4
Prion diseases	7/34	0.812174	1	0	0	0.797684	0.165951	STIP1;PRNP;IL1A;CASP12;HSPA5;MAPK1;PRKACB
GnRH signaling pathway	20/90	0.815061	1	0	0	0.860993	0.176067	MAP3K2;MAP2K4;CAMK2D;PLA2G4C;PLA2G4A;PRKCA;MAPK13;CDC42;MAPK10;NRAS;PLCB4;GNAQ;MAPK1;KRAS;SOS1;PRKACB;SOS2;CALM2;HBEGF;ATF4
Choline metabolism in cancer	22/99	0.824002	1	0	0	0.860993	0.166672	PCYT1B;LYPLA1;CHKA;PLA2G4C;PLA2G4A;PRKCA;PIK3CB;WASL;HIF1A;MAPK10;NRAS;PIK3CA;RPS6KB1;RHEB;AKT3;PDGFC;PIP5K1A;MAPK1;KRAS;SOS1;WASF1;SOS2
Circadian rhythm	6/30	0.824507	1	0	0	0.774893	0.149531	PRKAA1;CREB1;CUL1;CSNK1D;SKP1A;RBX1
Caffeine metabolism	1/6	0.83329	1	0	0	0.645745	0.117767	NAT2
Melanogenesis	22/100	0.838261	1	0	0	0.852383	0.150382	GSK3B;WNT10A;FZD3;EDN1;CAMK2D;WNT7B;FZD6;TYRP1;GNAI3;WNT7A;PRKCA;NRAS;CREB1;PLCB4;KITL;GNAQ;DVL2;MAPK1;CTNNB1;KRAS;PRKACB;CALM2
Folate biosynthesis	5/26	0.839369	1	0	0	0.74509	0.130468	DHFR;TPH2;SPR;AKR1B8;AKR1B7
Estrogen signaling pathway	30/134	0.843248	1	0	0	0.867418	0.14789	ATF2;HSP90AB1;GNAI3;TGFA;PIK3CB;HSP90B1;NRAS;AKT3;MAPK1;PRKACB;HSPA8;HSP90AA1;KRT13;ESR2;CREB1;PLCB4;KRT18;PIK3CA;KRT16;GNAQ;BCL2;KRAS;FKBP4;SOS1;CALM2;SOS2;EBAG9;FKBP5;ATF4;HBEGF
Glyoxylate and dicarboxylate metabolism	6/31	0.848675	1	0	0	0.749897	0.123042	GCSH;SHMT2;SHMT1;HAO1;MUT;DLD
Measles	32/144	0.861304	1	0	0	0.860993	0.128553	RAB9;GSK3B;CDKN1B;TNFAIP3;PIK3CB;TBK1;CASP8;CCND1;CASP3;AKT3;IKBKG;BID;HSPA8;CSNK2A1;APAF1;CHUK;CSNK2A2;MSN;EIF2AK2;EIF2S1;MAPK10;IL1A;CDK6;CCNE2;PIK3CA;CDK4;CDK2;BCL2;CYCS;FAS;TAB2;TLR4
Longevity regulating pathway	22/102	0.864184	1	0	0	0.835669	0.121983	ATF2;HSPA8;PRKAA1;HDAC2;HDAC1;PIK3CB;SIRT1;IGF1R;NRAS;CREB1;PIK3CA;RPS6KB1;RHEB;RB1CC1;AKT3;KRAS;EIF4E2;PRKACB;EIF4E;ATF4;ATG5;APPL1
Arginine and proline metabolism	10/50	0.866337	1	0	0	0.774893	0.111182	AMD2;P4HA1;MAOA;SMOX;ODC1;GOT2;SMS;LAP3;ALDH18A1;SAT1
Cysteine and methionine metabolism	10/50	0.866337	1	0	0	0.774893	0.111182	MTAP;DNMT1;AHCY;AMD2;MAT2A;CTH;GOT2;SMS;MTR;MAT2B
RIG-I-like receptor signaling pathway	14/68	0.871174	1	0	0	0.797684	0.110011	DDX3X;CHUK;ISG15;TANK;MAPK13;MAPK10;CYLD;CASP8;TBK1;TRIM25;RIPK1;IKBKG;AZI2;ATG5
Central carbon metabolism in cancer	13/64	0.876777	1	0	0	0.787001	0.103492	GLS2;PTEN;PIK3CB;HIF1A;GLS;SLC7A5;NRAS;PIK3CA;MYC;AKT3;MAPK1;KRAS;MET
Gap junction	18/86	0.878631	1	0	0	0.810935	0.104927	MAP3K2;GNAI3;CSNK1D;PRKCA;TJP1;GJA1;NRAS;TUBB5;PLCB4;GNAQ;PDGFC;CDK1;PRKG2;MAPK1;KRAS;SOS1;PRKACB;SOS2
Other glycan degradation	3/18	0.880576	1	0	0	0.645745	0.0821252	MANBA;FUCA2;AGA
C-type lectin receptor signaling pathway	24/112	0.880701	1	0	0	0.830243	0.105472	CHUK;PTPN11;BCL10;PIK3CB;PTGS2;RHOA;MAPK13;MAPK10;CYLD;PPP3CA;PPP3CB;NRAS;PAK1;CASP8;PIK3CA;IL23A;AKT3;PLCG2;MDM2;CASP1;MAPK1;KRAS;IKBKG;CALM2
PI3K-Akt signaling pathway	83/357	0.881138	1	0	0	0.900787	0.113987	YWHAE;ITGB1;ATF2;GSK3B;CSF3;CDKN1B;HSP90AB1;CSF1;YWHAB;PTEN;PPP2R2A;LAMC2;BRCA1;PIK3CB;IGF1R;CCND1;YWHAQ;PPP2R5E;MYC;AKT3;ITGAV;IKBKG;JAK2;YWHAH;MAGI1;HSP90AA1;CHUK;ITGA3;ITGA2;RPS6;F2R;PRKCA;PPP2R5C;YWHAZ;COL2A1;CREB1;CCNE2;PIK3CA;CDC37;COL4A5;SGK3;ITGA6;EIF4E2;SOS1;TLR4;SOS2;MET;EPHA2;ATF4;PRKAA1;TGFA;EFNA5;THBS1;HSP90B1;PPP2CB;GNG10;NRAS;BCL2L11;PPP2R3C;PDGFC;SPP1;THEM4;MAPK1;EIF4E;EIF4B;BDNF;…
Platelet activation	27/125	0.882807	1	0	0	0.836885	0.104316	ITGB1;ROCK1;ROCK2;GNAI3;PIK3CB;ACTG1;PPP1CB;RAP1B;PPP1CC;RAP1A;AKT3;PLCG2;PRKG2;MAPK1;PRKACB;PRKCI;PPP1R12A;ITGA2;F2R;PLA2G4C;PLA2G4A;RHOA;MAPK13;APBB1IP;PLCB4;PIK3CA;GNAQ
Cushing syndrome	35/159	0.884252	1	0	0	0.85287	0.104914	ATF2;GSK3B;CAMK2D;CDKN1B;GNAI3;ASH2L;RAP1B;RAP1A;CCND1;RBBP5;DVL2;WDR5;E2F1;MAPK1;E2F3;PRKACB;USP8;WNT10A;FZD3;WNT7B;FZD6;AXIN1;WNT7A;NCEH1;CDK6;CREB1;PLCB4;CCNE2;APC;CDK4;GNAQ;CDK2;CTNNB1;AIPL1;ATF4
Mucin type O-glycan biosynthesis	5/28	0.884371	1	0	0	0.691869	0.085016	GALNT7;GALNT4;GALNT3;GALNT1;C1GALT1
Acute myeloid leukemia	14/69	0.884674	1	0	0	0.786124	0.0963281	CSF2;CHUK;PIK3CB;NRAS;CCND1;PIK3CA;RPS6KB1;MYC;AKT3;MAPK1;KRAS;IKBKG;SOS1;SOS2
HIF-1 signaling pathway	22/104	0.886799	1	0	0	0.819599	0.0984645	EDN1;CAMK2D;CDKN1B;TFRC;RPS6;CUL2;PRKCA;PIK3CB;HIF1A;ENO4;IGF1R;RBX1;PIK3CA;RPS6KB1;AKT3;PLCG2;PGK1;BCL2;MAPK1;EIF4E2;TLR4;EIF4E
Long-term depression	12/61	0.89611	1	0	0	0.76219	0.0836062	PPP2CB;NRAS;PLCB4;GNAQ;PLA2G4C;GNAI3;PRKG2;PLA2G4A;MAPK1;PRKCA;KRAS;IGF1R
Pathways in cancer	126/535	0.897069	1	0	0	0.912491	0.0991173	HHIP;IGF1R;RASSF1;RPS6KA5;CCND1;CDH1;MYC;AKT3;SKP2;PRKACB;IL13RA1;TPM3;F2R;PRKCA;RBX1;EML4;MSH6;MSH2;CCNE2;MSH3;IL23A;COL4A5;MAX;CUL2;CUL1;TGFA;HIF1A;HSP90B1;GNG10;BCL2L11;TPR;PLCG2;DVL2;SMAD2;WNT10A;FZD3;TGFB2;JAG1;SMAD3;GADD45B;GADD45A;FZD6;PTK2;ESR2;FGF17;CDK6;KITL;CDK4;IL7;GNAQ;CDK2;MDM2;BCL2;CYCS;CALM2;ITGB1;GSK3B;CDKN1B;HSP90AB1;PTEN;LAMC2;PIK3CB;BRCA2;GLI3;CKS1B;CASP8;MECOM;CASP3;BDKRB2;IT…
MAPK signaling pathway	67/294	0.897318	1	0	0	0.882957	0.0956639	ATF2;CSF1;IL1RAP;IGF1R;RPS6KA3;PPP3CA;RPS6KA6;PPP3CB;RPS6KA5;MECOM;MYC;CASP3;AKT3;STMN1;IKBKG;PRKACB;MAP3K5;MAP2K4;CHUK;PLA2G4C;PLA2G4A;PRKCA;DUSP9;TGFBR1;IL1A;PPM1A;PPM1B;DDIT3;RASA1;RASA2;SOS1;SOS2;MET;CRK;EPHA2;ATF4;MAX;TGFA;EFNA5;STK3;RAP1B;CDC42;NRAS;PAK1;RAP1A;PDGFC;MAPK1;FLNB;PAK2;MAP4K3;MAP4K4;MAP3K2;HSPA8;TGFB2;GADD45B;GADD45A;BDNF;VEGFC;MAPK13;FGF17;EFNA1;MAPK10;KITL;TAOK1;FAS;TAB2;KRAS
Cocaine addiction	9/48	0.904264	1	0	0	0.726463	0.0731065	ATF2;CREB1;MAOA;BDNF;GNAI3;FOSB;PRKACB;SLC18A2;ATF4
Pentose and glucuronate interconversions	6/34	0.905273	1	0	0	0.68373	0.0680438	UGDH;UGP2;RPE;AKR1B8;XYLB;AKR1B7
Phenylalanine, tyrosine and tryptophan biosynthesis	1/8	0.90826	1	0	0	0.484308	0.0466022	GOT2
Riboflavin metabolism	1/8	0.90826	1	0	0	0.484308	0.0466022	ACP1
Glycosaminoglycan biosynthesis	10/53	0.909347	1	0	0	0.731032	0.0694691	CSGALNACT1;EXTL2;FUT8;CHSY1;GLCE;CSGALNACT2;B3GNT2;HS6ST1;B4GALT4;HS2ST1
Mineral absorption	8/44	0.912702	1	0	0	0.704449	0.0643484	TRPM7;MT2;ATP1A1;ATP2B1;SLC26A9;STEAP1;TRPM6;STEAP2
Phosphatidylinositol signaling system	20/98	0.912806	1	0	0	0.790708	0.0721374	PI4K2B;MTMR2;SACM1L;PTEN;OCRL;PRKCA;SYNJ2;PIK3CB;PIK3C2A;MTM1;PLCB4;INPP5F;IMPA1;PIK3CA;PPIP5K2;IMPAD1;PLCG2;PIP5K1A;PIK3C3;CALM2
Pertussis	15/76	0.913732	1	0	0	0.764697	0.0689897	ITGB1;GNAI3;CXCL5;RHOA;TIRAP;MAPK13;MAPK10;IL1A;IL23A;CFL2;CASP3;CASP1;MAPK1;TLR4;CALM2
Toxoplasmosis	22/108	0.923041	1	0	0	0.789243	0.0632043	ITGB1;HSPA8;TGFB2;CHUK;GNAI3;IRGM1;XIAP;LAMC2;LAMB1;MAPK13;MAPK10;CASP8;CASP3;AKT3;BCL2;CYCS;MAPK1;TAB2;ITGA6;IKBKG;JAK2;TLR4
Dopaminergic synapse	28/135	0.929118	1	0	0	0.803593	0.0590799	ATF2;GSK3B;CAMK2D;MAOA;GNAI3;PPP2R2A;PPP1CB;PPP1CC;PPP3CA;PPP2CB;GNG10;PPP3CB;PPP2R5E;PPP2R3C;KIF5B;AKT3;PRKACB;SLC18A2;PRKCA;PPP2R5C;MAPK13;MAPK10;CREB1;PLCB4;GNAQ;PPP2R2D;CALM2;ATF4
Endocrine and other factor-regulated calcium reabsorption	10/55	0.931009	1	0	0	0.704449	0.0503585	PLCB4;GNAQ;CLTC;BDKRB2;PRKCA;ATP1A1;AP2B1;ATP2B1;PRKACB;RAB11A
Rap1 signaling pathway	45/209	0.935519	1	0	0	0.834215	0.0556036	ITGB1;RALA;CSF1;CTNND1;GNAI3;PIK3CB;EFNA5;THBS1;ACTG1;IGF1R;RAP1B;CDC42;NRAS;PARD6B;RAP1A;CDH1;AKT3;PDGFC;KRIT1;MAPK1;MAGI1;PRKCI;MAGI3;F2R;VEGFC;PRKCA;RHOA;MAPK13;APBB1IP;FGF17;EFNA1;TIAM1;PLCB4;PIK3CA;PRKD3;KITL;PARD3;GNAQ;CTNNB1;KRAS;CALM2;RAPGEF6;MET;CRK;EPHA2
Amoebiasis	21/106	0.939961	1	0	0	0.767583	0.0475266	TGFB2;CSF2;ACTN1;PRKCA;LAMC2;LAMB1;PIK3CB;PTK2;PLCB4;SERPINB6A;PIK3CA;SERPINB9E;GNAQ;CASP3;SERPINB9F;SERPINB9G;COL4A5;SERPINB9C;PRKACB;RAB5A;TLR4
Collecting duct acid secretion	4/27	0.944536	1	0	0	0.573995	0.0327533	ATP6V1A;ATP6V1G1;ATP6V1D;ATP6V1C1
Ras signaling pathway	50/233	0.947676	1	0	0	0.831431	0.044683	CSF1;PIK3CB;IGF1R;RASSF1;TBK1;AKT3;IKBKG;PRKACB;CHUK;PLA2G4C;PLA2G4A;PRKCA;RHOA;TIAM1;PIK3CA;RASA1;RASA2;RIN1;SOS1;SOS2;MET;EXOC2;EPHA2;RALA;TGFA;RASAL2;EFNA5;RAP1B;CDC42;GNG10;NRAS;PAK1;RAP1A;PDGFC;PLCG2;ABL2;MAPK1;SHOC2;PAK3;PAK2;BDNF;VEGFC;PTPN11;FGF17;EFNA1;MAPK10;KITL;KRAS;CALM2;RAB5A
Kaposi sarcoma-associated herpesvirus infection	46/216	0.947834	1	0	0	0.825118	0.0442062	GSK3B;BECN1;H2-BL;CSF2;CXCL1;H2-Q2;PIK3CB;PTGS2;CXCL3;HIF1A;GM8909;PPP3CA;GNG10;PPP3CB;NRAS;TBK1;CASP8;CCND1;MYC;CASP3;AKT3;PLCG2;E2F1;MAPK1;E2F3;IKBKG;JAK2;BID;GABARAPL2;MAP2K4;CHUK;EIF2AK2;MAPK13;MAPK10;CDK6;CREB1;PIK3CA;CDK4;CTNNB1;GM11127;FAS;CYCS;PIK3C3;KRAS;CALM2;TLR3
Proximal tubule bicarbonate reclamation	3/22	0.948659	1	0	0	0.528336	0.0278463	GLS2;ATP1A1;GLS
Aldosterone-regulated sodium reabsorption	6/38	0.951709	1	0	0	0.611758	0.0302798	PIK3CA;MAPK1;PRKCA;KRAS;PIK3CB;ATP1A1
[truncated: 131 more rows]

## Sheet: down GO
Table S7: Gene set and pathway enrichment in differentially expressed genes of 4T1 cells for upregulated and downregulated genes in GO gene sets and KEGG pathways, respectively (sheets are labelled “up GO”, “up KEGG”, “down GO” and “down KEGG”, respectively).
[truncated: 4,786 more rows]

[truncated: 1 more sheets: down KEGG]
